# Supplementary material for: Random or Stochastic Monoallelic Expressed Genes Are Enriched for Neurodevelopmental Disorder Candidate Genes
Source: PLoS One. 2013 Dec 27;8(12):e85093. doi: 10.1371/journal.pone.0085093 (PMC3874034; doi:10.1371/journal.pone.0085093)
Supplement: File S1 — Allelic expression gene lists and CNV coordinates and their associated genes used in the study. (XLSX) [file pone.0085093.s003.xlsx]

## Sheet: dbVAR
Merged.CNV.ID	CNV.Chr	CNV.Start	CNV.End	CNV.Size	TX.Chr	TX.Start	TX.End	TX.Length	Accession	GeneSymbol
1	chr13	43357571	43930563	572992	chr13	43787699	44203613	415914	NM_001127615	ENOX1
1	chr13	43357571	43930563	572992	chr13	43597361	43683306	85945	NM_013238	DNAJC15
1	chr13	43357571	43930563	572992	chr13	43460523	43566407	105884	NM_033255	EPSTI1
1	chr13	43357571	43930563	572992	chr13	43355685	43365685	10000	NM_182508	FAM216B
1	chr13	43357571	43930563	572992	chr13	43460523	43566407	105884	NM_001002264	EPSTI1
1	chr13	43357571	43930563	572992	chr13	43787665	44361116	573451	NM_017993	ENOX1
1	chr13	43357571	43930563	572992	chr13	43787665	44361116	573451	NM_001242863	ENOX1
2	chr13	57706198	57825861	119663	chr13	57715051	57718073	3022	NM_001130406	PRR20D
2	chr13	57706198	57825861	119663	chr13	57715051	57718073	3022	NM_001130405	PRR20C
2	chr13	57706198	57825861	119663	chr13	57715051	57718073	3022	NM_001130404	PRR20B
2	chr13	57706198	57825861	119663	chr13	57741330	57744352	3022	NM_001130406	PRR20D
2	chr13	57706198	57825861	119663	chr13	57734765	57737787	3022	NM_001130404	PRR20B
2	chr13	57706198	57825861	119663	chr13	57721621	57724643	3022	NM_001130405	PRR20C
2	chr13	57706198	57825861	119663	chr13	57715051	57718073	3022	NM_198441	PRR20A
2	chr13	57706198	57825861	119663	chr13	57715051	57718073	3022	NM_001130407	PRR20E
2	chr13	57706198	57825861	119663	chr13	57721621	57724643	3022	NM_001130406	PRR20D
2	chr13	57706198	57825861	119663	chr13	57721621	57724643	3022	NM_198441	PRR20A
2	chr13	57706198	57825861	119663	chr13	57728194	57731216	3022	NM_198441	PRR20A
2	chr13	57706198	57825861	119663	chr13	57721621	57724643	3022	NM_001130407	PRR20E
2	chr13	57706198	57825861	119663	chr13	57721621	57724643	3022	NM_001130404	PRR20B
2	chr13	57706198	57825861	119663	chr13	57734765	57737787	3022	NM_001130405	PRR20C
2	chr13	57706198	57825861	119663	chr13	57728194	57731216	3022	NM_001130405	PRR20C
2	chr13	57706198	57825861	119663	chr13	57734765	57737787	3022	NM_001130406	PRR20D
2	chr13	57706198	57825861	119663	chr13	57728194	57731216	3022	NM_001130404	PRR20B
2	chr13	57706198	57825861	119663	chr13	57728194	57731216	3022	NM_001130407	PRR20E
2	chr13	57706198	57825861	119663	chr13	57728194	57731216	3022	NM_001130406	PRR20D
2	chr13	57706198	57825861	119663	chr13	57734765	57737787	3022	NM_198441	PRR20A
2	chr13	57706198	57825861	119663	chr13	57734765	57737787	3022	NM_001130407	PRR20E
2	chr13	57706198	57825861	119663	chr13	57741330	57744352	3022	NM_001130405	PRR20C
2	chr13	57706198	57825861	119663	chr13	57741330	57744352	3022	NM_198441	PRR20A
2	chr13	57706198	57825861	119663	chr13	57741330	57744352	3022	NM_001130404	PRR20B
2	chr13	57706198	57825861	119663	chr13	57741330	57744352	3022	NM_001130407	PRR20E
3	chr13	90688393	90849153	160760	chr13	90712500	90771971	59471	NR_047489	LINC00559
4	chr13	100560696	100680283	119587	chr13	100615274	100624178	8904	NM_033132	ZIC5
4	chr13	100560696	100680283	119587	chr13	100634025	100639019	4994	NM_007129	ZIC2
5	chr13	112692697	112795607	102910	chr13	112721912	112726020	4108	NM_005986	SOX1
6	chr13	114456136	114578049	121913	chr13	114523521	114536714	13193	NM_001143946	GAS6
6	chr13	114456136	114578049	121913	chr13	114523521	114539017	15496	NM_001143945	GAS6
6	chr13	114456136	114578049	121913	chr13	114518582	114545814	27232	NR_044995	GAS6-AS1
6	chr13	114456136	114578049	121913	chr13	114462215	114514899	52684	NM_182614	TMEM255B
6	chr13	114456136	114578049	121913	chr13	114523521	114567046	43525	NM_000820	GAS6
6	chr13	114456136	114578049	121913	chr13	114567149	114569805	2656	NR_044993	LOC100506394
7	chr13	114740081	114931732	191651	chr13	114747193	114898095	150902	NM_007368	RASA3
8	chr13	114965694	115109840	144146	chr13	115079964	115092803	12839	NM_032436	CHAMP1
8	chr13	114965694	115109840	144146	chr13	115000361	115038150	37789	NM_001078645	CDC16
8	chr13	114965694	115109840	144146	chr13	115000361	115038150	37789	NM_003903	CDC16
8	chr13	114965694	115109840	144146	chr13	115047058	115071291	24233	NM_080687	UPF3A
8	chr13	114965694	115109840	144146	chr13	115047058	115071291	24233	NM_023011	UPF3A
8	chr13	114965694	115109840	144146	chr13	115079964	115092803	12839	NM_001164144	CHAMP1
8	chr13	114965694	115109840	144146	chr13	115079964	115092803	12839	NM_001164145	CHAMP1
9	chr12	1614395	1759431	145036	chr12	1675158	1703331	28173	NM_152441	FBXL14
9	chr12	1614395	1759431	145036	chr12	1738411	1756378	17967	NM_032642	WNT5B
9	chr12	1614395	1759431	145036	chr12	1726221	1756377	30156	NM_030775	WNT5B
10	chr12	2147469	2257818	110349	chr12	2162415	2807115	644700	NM_001129833	CACNA1C
10	chr12	2147469	2257818	110349	chr12	2162415	2807115	644700	NM_001129840	CACNA1C
10	chr12	2147469	2257818	110349	chr12	2162415	2807115	644700	NM_001129844	CACNA1C
10	chr12	2147469	2257818	110349	chr12	2162415	2807115	644700	NM_001129843	CACNA1C
10	chr12	2147469	2257818	110349	chr12	2162415	2807115	644700	NM_199460	CACNA1C
10	chr12	2147469	2257818	110349	chr12	2162415	2807115	644700	NM_001167624	CACNA1C
10	chr12	2147469	2257818	110349	chr12	2162415	2807115	644700	NM_001167625	CACNA1C
10	chr12	2147469	2257818	110349	chr12	2162415	2807115	644700	NM_001129838	CACNA1C
10	chr12	2147469	2257818	110349	chr12	2162415	2807115	644700	NM_001129829	CACNA1C
10	chr12	2147469	2257818	110349	chr12	2162415	2807115	644700	NM_000719	CACNA1C
10	chr12	2147469	2257818	110349	chr12	2162415	2807115	644700	NM_001129835	CACNA1C
10	chr12	2147469	2257818	110349	chr12	2162415	2807115	644700	NM_001167623	CACNA1C
10	chr12	2147469	2257818	110349	chr12	2162415	2807115	644700	NM_001129834	CACNA1C
10	chr12	2147469	2257818	110349	chr12	2162415	2807115	644700	NM_001129841	CACNA1C
10	chr12	2147469	2257818	110349	chr12	2162415	2807115	644700	NM_001129830	CACNA1C
10	chr12	2147469	2257818	110349	chr12	2162415	2807115	644700	NM_001129842	CACNA1C
10	chr12	2147469	2257818	110349	chr12	2162415	2807115	644700	NM_001129839	CACNA1C
10	chr12	2147469	2257818	110349	chr12	2162415	2807115	644700	NM_001129827	CACNA1C
10	chr12	2147469	2257818	110349	chr12	2162415	2807115	644700	NM_001129831	CACNA1C
10	chr12	2147469	2257818	110349	chr12	2162415	2807115	644700	NM_001129846	CACNA1C
10	chr12	2147469	2257818	110349	chr12	2162415	2807115	644700	NM_001129837	CACNA1C
10	chr12	2147469	2257818	110349	chr12	2162415	2807115	644700	NM_001129832	CACNA1C
10	chr12	2147469	2257818	110349	chr12	2162415	2807115	644700	NM_001129836	CACNA1C
11	chr12	7995278	8127162	131884	chr12	7966396	8025495	59099	NM_153449	SLC2A14
11	chr12	7995278	8127162	131884	chr12	8071823	8088892	17069	NM_006931	SLC2A3
12	chr12	8323225	8589822	266597	chr12	8332804	8353596	20792	NR_026788	FAM66C
12	chr12	8323225	8589822	266597	chr12	8325149	8332642	7493	NM_001004328	ZNF705A
12	chr12	8323225	8589822	266597	chr12	8383644	8395542	11898	NR_024254	FAM86FP
12	chr12	8323225	8589822	266597	chr12	8373855	8380214	6359	NM_018088	FAM90A1
12	chr12	8323225	8589822	266597	chr12	8509559	8543348	33789	NR_024420	LOC389634
13	chr12	11168752	11293347	124595	chr12	10998447	11324224	325777	NR_037918	PRH1-PRR4
13	chr12	11168752	11293347	124595	chr12	11174270	11175170	900	NM_176888	TAS2R19
13	chr12	11168752	11293347	124595	chr12	11243885	11244912	1027	NM_176884	TAS2R43
13	chr12	11168752	11293347	124595	chr12	11182985	11184006	1021	NM_176885	TAS2R31
13	chr12	11168752	11293347	124595	chr12	11213963	11214893	930	NM_176887	TAS2R46
13	chr12	11168752	11293347	124595	chr12	11285883	11286843	960	NM_001097643	TAS2R30
14	chr12	19362218	19854823	492605	chr12	19282625	19526602	243977	NM_001143821	PLEKHA5
14	chr12	19362218	19854823	492605	chr12	19282625	19529333	246708	NM_019012	PLEKHA5
14	chr12	19362218	19854823	492605	chr12	19282625	19529333	246708	NM_001256470	PLEKHA5
14	chr12	19362218	19854823	492605	chr12	19358258	19529333	171075	NM_001256787	PLEKHA5
14	chr12	19362218	19854823	492605	chr12	19592607	19675173	82566	NM_001114176	AEBP2
14	chr12	19362218	19854823	492605	chr12	19592607	19675173	82566	NM_153207	AEBP2
14	chr12	19362218	19854823	492605	chr12	19593514	19675173	81659	NM_001267043	AEBP2
15	chr12	20892854	21029179	136325	chr12	20848398	20906320	57922	NM_001145944	SLCO1C1
15	chr12	20892854	21029179	136325	chr12	20848288	20906320	58032	NM_001145945	SLCO1C1
15	chr12	20892854	21029179	136325	chr12	20848288	20906320	58032	NM_001145946	SLCO1C1
15	chr12	20892854	21029179	136325	chr12	20848398	20906320	57922	NM_017435	SLCO1C1
15	chr12	20892854	21029179	136325	chr12	20963637	21069843	106206	NM_019844	SLCO1B3
16	chr12	31224846	31408139	183293	chr12	31226778	31257725	30947	NM_152438	DDX11
16	chr12	31224846	31408139	183293	chr12	31226778	31257725	30947	NM_004399	DDX11
16	chr12	31224846	31408139	183293	chr12	31173696	31226781	53085	NR_038927	DDX11-AS1
16	chr12	31224846	31408139	183293	chr12	31226778	31257725	30947	NM_030653	DDX11
16	chr12	31224846	31408139	183293	chr12	31226778	31257725	30947	NM_001257145	DDX11
16	chr12	31224846	31408139	183293	chr12	31226778	31257725	30947	NM_001257144	DDX11
17	chr12	34258917	38958438	4699521	chr12	38710556	38723528	12972	NM_001013620	ALG10B
18	chr12	48537016	48758263	221247	chr12	48516429	48540187	23758	NM_001166688	PFKM
18	chr12	48537016	48758263	221247	chr12	48513012	48540187	27175	NM_000289	PFKM
18	chr12	48537016	48758263	221247	chr12	48499655	48540187	40532	NM_001166686	PFKM
18	chr12	48537016	48758263	221247	chr12	48516429	48540187	23758	NM_001166687	PFKM
18	chr12	48537016	48758263	221247	chr12	48596121	48597075	954	NM_001004134	OR10AD1
18	chr12	48537016	48758263	221247	chr12	48577365	48579709	2344	NM_001013635	C12orf68
18	chr12	48537016	48758263	221247	chr12	48541571	48551377	9806	NM_024095	ASB8
18	chr12	48537016	48758263	221247	chr12	48722762	48724062	1300	NM_181788	H1FNT
18	chr12	48537016	48758263	221247	chr12	48733792	48745029	11237	NM_001172682	ZNF641
18	chr12	48537016	48758263	221247	chr12	48733792	48744674	10882	NM_001172681	ZNF641
18	chr12	48537016	48758263	221247	chr12	48733792	48744674	10882	NM_152320	ZNF641
19	chr12	52681150	52783493	102343	chr12	52695648	52702947	7299	NM_002284	KRT86
19	chr12	52681150	52783493	102343	chr12	52679696	52685299	5603	NM_002281	KRT81
19	chr12	52681150	52783493	102343	chr12	52753789	52761309	7520	NM_002283	KRT85
19	chr12	52681150	52783493	102343	chr12	52708084	52715182	7098	NM_002282	KRT83
19	chr12	52681150	52783493	102343	chr12	52771595	52779417	7822	NM_033045	KRT84
20	chr12	54328869	54449853	120984	chr12	54422193	54424607	2414	NM_004503	HOXC6
20	chr12	54328869	54449853	120984	chr12	54366909	54370203	3294	NM_014212	HOXC11
20	chr12	54328869	54449853	120984	chr12	54329111	54333427	4316	NR_047507	HOXC-AS5
20	chr12	54328869	54449853	120984	chr12	54348713	54350350	1637	NM_173860	HOXC12
20	chr12	54328869	54449853	120984	chr12	54332575	54340328	7753	NM_017410	HOXC13
20	chr12	54328869	54449853	120984	chr12	54356091	54362540	6449	NR_003716	HOTAIR
20	chr12	54328869	54449853	120984	chr12	54356091	54362698	6607	NR_047518	HOTAIR
20	chr12	54328869	54449853	120984	chr12	54356091	54368740	12649	NR_047517	HOTAIR
20	chr12	54328869	54449853	120984	chr12	54410641	54429144	18503	NR_003084	HOXC5
20	chr12	54328869	54449853	120984	chr12	54378945	54384062	5117	NM_017409	HOXC10
20	chr12	54328869	54449853	120984	chr12	54393876	54397120	3244	NM_006897	HOXC9
20	chr12	54328869	54449853	120984	chr12	54385521	54385631	110	NR_029617	MIR196A2
20	chr12	54328869	54449853	120984	chr12	54402889	54406545	3656	NM_022658	HOXC8
20	chr12	54328869	54449853	120984	chr12	54410641	54449814	39173	NM_014620	HOXC4
20	chr12	54328869	54449853	120984	chr12	54410641	54424607	13966	NM_153693	HOXC6
20	chr12	54328869	54449853	120984	chr12	54447660	54449814	2154	NM_153633	HOXC4
20	chr12	54328869	54449853	120984	chr12	54426831	54429144	2313	NM_018953	HOXC5
20	chr12	54328869	54449853	120984	chr12	54427733	54427829	96	NR_030753	MIR615
21	chr12	63928721	64143934	215213	chr12	63952692	64062354	109662	NM_173812	DPY19L2
22	chr12	70863817	71188722	324905	chr12	70910631	71003624	92993	NM_001206971	PTPRB
22	chr12	70863817	71188722	324905	chr12	70910631	71003624	92993	NM_002837	PTPRB
22	chr12	70863817	71188722	324905	chr12	70910631	71031220	120589	NM_001109754	PTPRB
22	chr12	70863817	71188722	324905	chr12	71031852	71314584	282732	NM_002849	PTPRR
22	chr12	70863817	71188722	324905	chr12	71031852	71148388	116536	NM_130846	PTPRR
22	chr12	70863817	71188722	324905	chr12	71031852	71148388	116536	NR_073474	PTPRR
22	chr12	70863817	71188722	324905	chr12	71031852	71148539	116687	NM_001207016	PTPRR
22	chr12	70863817	71188722	324905	chr12	71031852	71182710	150858	NM_001207015	PTPRR
22	chr12	70863817	71188722	324905	chr12	70910631	71003624	92993	NM_001206972	PTPRB
23	chr12	94251350	94591188	339838	chr12	94542498	94701451	158953	NM_005761	PLXNC1
24	chr12	99972505	100127963	155458	chr12	100041527	100043892	2365	NM_153364	FAM71C
24	chr12	99972505	100127963	155458	chr12	99128568	100378432	1249864	NM_152788	ANKS1B
25	chr12	107084338	107366764	282426	chr12	106976684	107156582	179898	NM_213594	RFX4
25	chr12	107084338	107366764	282426	chr12	106890187	107168609	278422	NR_040246	LOC100287944
25	chr12	107084338	107366764	282426	chr12	106994914	107156582	161668	NM_001206691	RFX4
25	chr12	107084338	107366764	282426	chr12	107168398	107283094	114696	NM_018157	RIC8B
25	chr12	107084338	107366764	282426	chr12	107078476	107156582	78106	NM_032491	RFX4
25	chr12	107084338	107366764	282426	chr12	107349543	107367813	18270	NM_152261	C12orf23
26	chr12	128799131	128915519	116388	chr12	128751947	129192460	440513	NM_001136103	TMEM132C
27	chr12	132311957	132415284	103327	chr12	132312940	132336316	23376	NM_016155	MMP17
27	chr12	132311957	132415284	103327	chr12	132379278	132407707	28429	NM_003565	ULK1
27	chr12	132311957	132415284	103327	chr12	132413812	132428406	14594	NM_025215	PUS1
27	chr12	132311957	132415284	103327	chr12	132413744	132428406	14662	NM_001002020	PUS1
27	chr12	132311957	132415284	103327	chr12	132413797	132428406	14609	NM_001002019	PUS1
28	chr12	132609928	133198926	588998	chr12	132628992	132636986	7994	NM_024078	NOC4L
28	chr12	132609928	133198926	588998	chr12	132568827	132610885	42058	NR_003290	EP400NL
28	chr12	132609928	133198926	588998	chr12	132621139	132628880	7741	NM_175066	DDX51
28	chr12	132609928	133198926	588998	chr12	133067156	133161773	94617	NM_001142641	FBRSL1
28	chr12	132609928	133198926	588998	chr12	132680916	132905905	224989	NM_001122636	GALNT9
28	chr12	132609928	133198926	588998	chr12	132680916	132690573	9657	NM_021808	GALNT9
28	chr12	132609928	133198926	588998	chr12	132851976	132857486	5510	NR_024563	LOC100130238
28	chr12	132609928	133198926	588998	chr12	133179735	133187037	7302	NM_001195520	LRCOL1
28	chr12	132609928	133198926	588998	chr12	133195402	133198972	3570	NM_016318	P2RX2
28	chr12	132609928	133198926	588998	chr12	133195402	133198972	3570	NM_170683	P2RX2
28	chr12	132609928	133198926	588998	chr12	133195402	133198972	3570	NM_170682	P2RX2
28	chr12	132609928	133198926	588998	chr12	133195402	133198972	3570	NM_174872	P2RX2
28	chr12	132609928	133198926	588998	chr12	133195402	133198972	3570	NM_012226	P2RX2
28	chr12	132609928	133198926	588998	chr12	133195402	133198972	3570	NM_174873	P2RX2
29	chr11	60059	216243	156184	chr11	202923	207422	4499	NM_016526	BET1L
29	chr11	60059	216243	156184	chr11	196760	200258	3498	NM_053280	ODF3
29	chr11	60059	216243	156184	chr11	193079	194500	1421	NM_001097610	LOC653486
29	chr11	60059	216243	156184	chr11	126986	131920	4934	NR_028326	LOC100133161
29	chr11	60059	216243	156184	chr11	193079	194573	1494	NM_145651	SCGB1C1
29	chr11	60059	216243	156184	chr11	202923	207422	4499	NM_001098787	BET1L
29	chr11	60059	216243	156184	chr11	215029	236362	21333	NM_012239	SIRT3
29	chr11	60059	216243	156184	chr11	208529	215110	6581	NM_021932	RIC8A
29	chr11	60059	216243	156184	chr11	215029	236362	21333	NM_001017524	SIRT3
30	chr11	3019433	3225302	205869	chr11	3022151	3078681	56530	NM_001014437	CARS
30	chr11	3019433	3225302	205869	chr11	3022151	3078681	56530	NM_001751	CARS
30	chr11	3019433	3225302	205869	chr11	3022151	3078681	56530	NM_001194997	CARS
30	chr11	3019433	3225302	205869	chr11	3022151	3078681	56530	NR_036542	CARS
30	chr11	3019433	3225302	205869	chr11	3022151	3078681	56530	NM_139273	CARS
30	chr11	3019433	3225302	205869	chr11	3108345	3186582	78237	NM_145638	OSBPL5
30	chr11	3019433	3225302	205869	chr11	3108345	3186582	78237	NM_001144063	OSBPL5
30	chr11	3019433	3225302	205869	chr11	3108345	3186582	78237	NM_020896	OSBPL5
31	chr11	3426081	3674989	248908	chr11	3659735	3663485	3750	NM_053017	ART5
31	chr11	3426081	3674989	248908	chr11	3659735	3663546	3811	NM_001079536	ART5
31	chr11	3426081	3674989	248908	chr11	3402190	3430378	28188	NR_024248	LOC650368
31	chr11	3426081	3674989	248908	chr11	3647689	3658789	11100	NR_002720	TRPC2
31	chr11	3426081	3674989	248908	chr11	3666360	3685646	19286	NM_004314	ART1
32	chr11	4163297	4387745	224448	chr11	4208381	4223883	15502	NR_047550	LOC100506082
33	chr11	8371126	8566552	195426	chr11	8413417	8615503	202086	NM_030906	STK33
34	chr11	9005867	9311224	305357	chr11	9111858	9111926	68	NR_049874	MIR5691
34	chr11	9005867	9311224	305357	chr11	9002122	9025596	23474	NM_020645	NRIP3
34	chr11	9005867	9311224	305357	chr11	9041046	9113150	72104	NM_020974	SCUBE2
34	chr11	9005867	9311224	305357	chr11	9041046	9113150	72104	NM_001170690	SCUBE2
34	chr11	9005867	9311224	305357	chr11	9302200	9336315	34115	NR_028491	TMEM41B
34	chr11	9005867	9311224	305357	chr11	9160374	9286873	126499	NM_001243254	DENND5A
34	chr11	9005867	9311224	305357	chr11	9160374	9286873	126499	NM_015213	DENND5A
34	chr11	9005867	9311224	305357	chr11	9115909	9117737	1828	NR_027713	KRT8P41
34	chr11	9005867	9311224	305357	chr11	9302200	9336315	34115	NM_015012	TMEM41B
35	chr11	11155341	11381437	226096	chr11	11373488	11374904	1416	NM_001256686	CSNK2A3
35	chr11	11155341	11381437	226096	chr11	11292420	11643561	351141	NM_198516	GALNT18
36	chr11	14474917	14576816	101899	chr11	14479048	14521415	42367	NM_001144062	COPB1
36	chr11	14474917	14576816	101899	chr11	14479048	14521404	42356	NM_016451	COPB1
36	chr11	14474917	14576816	101899	chr11	14526421	14665180	138759	NM_148976	PSMA1
36	chr11	14474917	14576816	101899	chr11	14479048	14521441	42393	NM_001144061	COPB1
36	chr11	14474917	14576816	101899	chr11	14526421	14541991	15570	NM_002786	PSMA1
36	chr11	14474917	14576816	101899	chr11	14535511	14541991	6480	NM_001143937	PSMA1
37	chr11	46303184	46425613	122429	chr11	46397951	46398034	83	NR_039837	MIR4688
37	chr11	46303184	46425613	122429	chr11	46368955	46402104	33149	NM_003646	DGKZ
37	chr11	46303184	46425613	122429	chr11	46368955	46402104	33149	NM_001199266	DGKZ
37	chr11	46303184	46425613	122429	chr11	46366816	46402104	35288	NM_201533	DGKZ
37	chr11	46303184	46425613	122429	chr11	46354454	46402104	47650	NM_201532	DGKZ
37	chr11	46303184	46425613	122429	chr11	46299227	46342972	43745	NM_052854	CREB3L1
37	chr11	46303184	46425613	122429	chr11	46368955	46402104	33149	NM_001199268	DGKZ
37	chr11	46303184	46425613	122429	chr11	46368955	46402104	33149	NM_001199267	DGKZ
37	chr11	46303184	46425613	122429	chr11	46383144	46402104	18960	NM_001105540	DGKZ
37	chr11	46303184	46425613	122429	chr11	46402617	46405387	2770	NM_001012334	MDK
37	chr11	46303184	46425613	122429	chr11	46402333	46405387	3054	NM_001270550	MDK
37	chr11	46303184	46425613	122429	chr11	46417961	46612914	194953	NM_017749	AMBRA1
37	chr11	46303184	46425613	122429	chr11	46403204	46405387	2183	NM_001270552	MDK
37	chr11	46303184	46425613	122429	chr11	46417961	46615619	197658	NM_001267783	AMBRA1
37	chr11	46303184	46425613	122429	chr11	46417961	46615619	197658	NM_001267782	AMBRA1
37	chr11	46303184	46425613	122429	chr11	46406639	46408107	1468	NM_000741	CHRM4
37	chr11	46303184	46425613	122429	chr11	46403204	46405387	2183	NM_002391	MDK
37	chr11	46303184	46425613	122429	chr11	46403204	46405387	2183	NR_073039	MDK
37	chr11	46303184	46425613	122429	chr11	46403260	46405387	2127	NM_001012333	MDK
37	chr11	46303184	46425613	122429	chr11	46403260	46405387	2127	NM_001270551	MDK
38	chr11	49729695	50118089	388394	chr11	50003008	50004071	1063	NM_001005270	OR4C12
38	chr11	49729695	50118089	388394	chr11	49580079	49831969	251890	NR_027044	LOC440040
38	chr11	49729695	50118089	388394	chr11	49973942	49974971	1029	NM_001001955	OR4C13
39	chr11	55422345	55603590	181245	chr11	55540913	55541858	945	NM_001001967	OR5D13
39	chr11	55422345	55603590	181245	chr11	55432642	55433572	930	NM_001004704	OR4C6
39	chr11	55422345	55603590	181245	chr11	55563031	55563976	945	NM_001004735	OR5D14
39	chr11	55422345	55603590	181245	chr11	55594694	55595630	936	NM_001004739	OR5L2
39	chr11	55422345	55603590	181245	chr11	55578942	55579878	936	NM_001004738	OR5L1
39	chr11	55422345	55603590	181245	chr11	55587105	55588047	942	NM_001001952	OR5D18
40	chr11	67763676	68197054	433378	chr11	67801363	67801448	85	NR_039840	MIR4691
40	chr11	67763676	68197054	433378	chr11	67798083	67804114	6031	NM_002496	NDUFS8
40	chr11	67763676	68197054	433378	chr11	67777789	67796743	18954	NM_000694	ALDH3B1
40	chr11	67763676	68197054	433378	chr11	67758574	67771593	13019	NM_030930	UNC93B1
40	chr11	67763676	68197054	433378	chr11	67776047	67796743	20696	NM_001161473	ALDH3B1
40	chr11	67763676	68197054	433378	chr11	67777789	67796743	18954	NM_001030010	ALDH3B1
40	chr11	67763676	68197054	433378	chr11	67820325	67888858	68533	NM_001277	CHKA
40	chr11	67763676	68197054	433378	chr11	67810446	67818366	7920	NM_006053	TCIRG1
40	chr11	67763676	68197054	433378	chr11	67806461	67818366	11905	NM_006019	TCIRG1
40	chr11	67763676	68197054	433378	chr11	67820325	67888858	68533	NM_212469	CHKA
40	chr11	67763676	68197054	433378	chr11	67923506	67980784	57278	NM_017635	SUV420H1
40	chr11	67763676	68197054	433378	chr11	68080107	68216743	136636	NM_002335	LRP5
40	chr11	67763676	68197054	433378	chr11	67933185	67980784	47599	NM_016028	SUV420H1
40	chr11	67763676	68197054	433378	chr11	68028802	68039469	10667	NM_022338	C11orf24
41	chr11	69434047	69666065	232018	chr11	69513005	69519106	6101	NM_005117	FGF19
41	chr11	69434047	69666065	232018	chr11	69455872	69469242	13370	NM_053056	CCND1
41	chr11	69434047	69666065	232018	chr11	69480331	69490165	9834	NM_153451	ORAOV1
41	chr11	69434047	69666065	232018	chr11	69587796	69590171	2375	NM_002007	FGF4
41	chr11	69434047	69666065	232018	chr11	69624735	69634192	9457	NM_005247	FGF3
42	chr11	70826552	70974116	147564	chr11	70313960	70935808	621848	NM_012309	SHANK2
43	chr11	73936667	74534455	597788	chr11	74202922	74204755	1833	NM_001144869	LIPT2
43	chr11	73936667	74534455	597788	chr11	73882107	73965748	83641	NM_016147	PPME1
43	chr11	73936667	74534455	597788	chr11	73882107	73965748	83641	NM_001271593	PPME1
43	chr11	73936667	74534455	597788	chr11	73977701	74022699	44998	NM_182904	P4HA3
43	chr11	73936667	74534455	597788	chr11	74165885	74178600	12715	NM_005472	KCNE3
43	chr11	73936667	74534455	597788	chr11	74041360	74109502	68142	NM_173582	PGM2L1
43	chr11	73936667	74534455	597788	chr11	74303574	74354105	50531	NR_046409	POLD3
43	chr11	73936667	74534455	597788	chr11	74303574	74354105	50531	NM_006591	POLD3
43	chr11	73936667	74534455	597788	chr11	74431312	74431382	70	NR_039845	MIR4696
43	chr11	73936667	74534455	597788	chr11	74303649	74354105	50456	NR_046410	POLD3
43	chr11	73936667	74534455	597788	chr11	74407473	74442186	34713	NM_015424	CHRDL2
43	chr11	73936667	74534455	597788	chr11	74459912	74553458	93546	NM_001098638	RNF169
44	chr11	76756958	76889770	132812	chr11	76839309	76896041	56732	NM_001127179	MYO7A
44	chr11	76756958	76889770	132812	chr11	76777991	76837198	59207	NM_004055	CAPN5
44	chr11	76756958	76889770	132812	chr11	76813885	76814377	492	NM_006189	OMP
44	chr11	76756958	76889770	132812	chr11	76839309	76926286	86977	NM_000260	MYO7A
44	chr11	76756958	76889770	132812	chr11	76839315	76926286	86971	NM_001127180	MYO7A
45	chr11	82200135	83534601	1334466	chr11	82783107	82784754	1647	NR_038903	LOC100506233
45	chr11	82200135	83534601	1334466	chr11	82535408	82611557	76149	NM_005040	PRCP
45	chr11	82200135	83534601	1334466	chr11	82443045	82444906	1861	NM_175885	FAM181B
45	chr11	82200135	83534601	1334466	chr11	82535408	82611557	76149	NM_199418	PRCP
45	chr11	82200135	83534601	1334466	chr11	82692477	82782884	90407	NM_014488	RAB30
45	chr11	82200135	83534601	1334466	chr11	82612736	82645699	32963	NM_145018	C11orf82
45	chr11	82200135	83534601	1334466	chr11	82752505	82752640	135	NR_033347	SNORA70E
45	chr11	82200135	83534601	1334466	chr11	82868136	82896835	28699	NM_015885	PCF11
45	chr11	82200135	83534601	1334466	chr11	83166055	83984323	818268	NM_001142700	DLG2
45	chr11	82200135	83534601	1334466	chr11	83166055	84028382	862327	NM_001206769	DLG2
45	chr11	82200135	83534601	1334466	chr11	82905290	82960013	54723	NM_182603	ANKRD42
45	chr11	82200135	83534601	1334466	chr11	82972501	82997377	24876	NM_021825	CCDC90B
45	chr11	82200135	83534601	1334466	chr11	83166055	83393468	227413	NM_001142702	DLG2
45	chr11	82200135	83534601	1334466	chr11	83166055	85338314	2172259	NM_001142699	DLG2
45	chr11	82200135	83534601	1334466	chr11	83166055	84634465	1468410	NM_001364	DLG2
46	chr11	88674159	89467600	793441	chr11	89392464	89431886	39422	NM_153696	FOLH1B
46	chr11	88674159	89467600	793441	chr11	89057521	89224653	167132	NR_026571	NOX4
46	chr11	88674159	89467600	793441	chr11	89057521	89224653	167132	NM_001143836	NOX4
46	chr11	88674159	89467600	793441	chr11	89057521	89224653	167132	NM_016931	NOX4
46	chr11	88674159	89467600	793441	chr11	89057521	89322779	265258	NM_001143837	NOX4
46	chr11	88674159	89467600	793441	chr11	88911039	89028927	117888	NM_000372	TYR
46	chr11	88674159	89467600	793441	chr11	88237743	88796816	559073	NM_000842	GRM5
46	chr11	88674159	89467600	793441	chr11	88237743	88781240	543497	NM_001143831	GRM5
46	chr11	88674159	89467600	793441	chr11	89443466	89451040	7574	NM_001146162	TRIM77
46	chr11	88674159	89467600	793441	chr11	89443466	89451040	7574	NM_001271942	TRIM77
47	chr11	89575317	89735522	160205	chr11	89570045	89673722	103677	NR_049875	MIR5692A1
47	chr11	89575317	89735522	160205	chr11	89659929	89666168	6239	NM_001206627	TRIM49D1
47	chr11	89575317	89735522	160205	chr11	89644578	89653576	8998	NM_001105522	TRIM49D2P
47	chr11	89575317	89735522	160205	chr11	89603605	89609185	5580	NM_001164397	TRIM64B
47	chr11	89575317	89735522	160205	chr11	89575164	89584136	8972	NR_028346	TRIM53AP
47	chr11	89575317	89735522	160205	chr11	89644639	89650878	6239	NM_001206627	TRIM49D1
47	chr11	89575317	89735522	160205	chr11	89657231	89666229	8998	NM_001105522	TRIM49D2P
47	chr11	89575317	89735522	160205	chr11	89726708	89735676	8968	NR_028346	TRIM53AP
47	chr11	89575317	89735522	160205	chr11	89701671	89707240	5569	NM_001136486	TRIM64
48	chr11	104662708	104768357	105649	chr11	104757417	104769397	11980	NR_034070	CASP12
48	chr11	104662708	104768357	105649	chr11	104756444	104769397	12953	NM_001191016	CASP12
48	chr11	104662708	104768357	105649	chr11	104757417	104769397	11980	NR_034071	CASP12
48	chr11	104662708	104768357	105649	chr11	104757417	104769397	11980	NR_034063	CASP12
48	chr11	104662708	104768357	105649	chr11	104757417	104769397	11980	NR_034061	CASP12
48	chr11	104662708	104768357	105649	chr11	104757417	104769397	11980	NR_034068	CASP12
48	chr11	104662708	104768357	105649	chr11	104757417	104769397	11980	NR_034067	CASP12
48	chr11	104662708	104768357	105649	chr11	104757417	104769397	11980	NR_034066	CASP12
48	chr11	104662708	104768357	105649	chr11	104757417	104769397	11980	NR_034065	CASP12
48	chr11	104662708	104768357	105649	chr11	104757417	104769397	11980	NR_034064	CASP12
49	chr11	124137272	124242159	104887	chr11	124189157	124190093	936	NM_001002918	OR8D2
49	chr11	124137272	124242159	104887	chr11	124179735	124180662	927	NM_001002917	OR8D1
50	chr11	125364774	125936763	571989	chr11	125495030	125527042	32012	NM_001114122	CHEK1
50	chr11	125364774	125936763	571989	chr11	125462738	125491280	28542	NM_152713	STT3A
50	chr11	125364774	125936763	571989	chr11	125315640	125366206	50566	NM_005103	FEZ1
50	chr11	125364774	125936763	571989	chr11	125439297	125454575	15278	NM_001007277	EI24
50	chr11	125364774	125936763	571989	chr11	125358095	125366206	8111	NM_022549	FEZ1
50	chr11	125364774	125936763	571989	chr11	125439297	125454575	15278	NM_004879	EI24
50	chr11	125364774	125936763	571989	chr11	125542228	125550793	8565	NM_020069	ACRV1
50	chr11	125364774	125936763	571989	chr11	125495030	125527042	32012	NM_001244846	CHEK1
50	chr11	125364774	125936763	571989	chr11	125495030	125527042	32012	NR_045204	CHEK1
50	chr11	125364774	125936763	571989	chr11	125495030	125546150	51120	NM_001114121	CHEK1
50	chr11	125364774	125936763	571989	chr11	125496250	125527042	30792	NM_001274	CHEK1
50	chr11	125364774	125936763	571989	chr11	125496123	125527042	30919	NR_045205	CHEK1
50	chr11	125364774	125936763	571989	chr11	125763379	125773116	9737	NM_001271985	PUS3
50	chr11	125364774	125936763	571989	chr11	125542228	125550793	8565	NM_001612	ACRV1
50	chr11	125364774	125936763	571989	chr11	125542228	125550793	8565	NM_020107	ACRV1
50	chr11	125364774	125936763	571989	chr11	125542228	125550793	8565	NM_020108	ACRV1
50	chr11	125364774	125936763	571989	chr11	125703210	125709967	6757	NM_001144874	PATE4
50	chr11	125364774	125936763	571989	chr11	125646027	125648714	2687	NM_212555	PATE2
50	chr11	125364774	125936763	571989	chr11	125616187	125619743	3556	NM_138294	PATE1
50	chr11	125364774	125936763	571989	chr11	125658005	125661495	3490	NM_001129883	PATE3
50	chr11	125364774	125936763	571989	chr11	125756954	125770541	13587	NM_001134793	HYLS1
50	chr11	125364774	125936763	571989	chr11	125753508	125770541	17033	NM_145014	HYLS1
50	chr11	125364774	125936763	571989	chr11	125826712	125933187	106475	NM_016952	CDON
50	chr11	125364774	125936763	571989	chr11	125763379	125773116	9737	NM_031307	PUS3
50	chr11	125364774	125936763	571989	chr11	125826712	125933187	106475	NM_001243597	CDON
50	chr11	125364774	125936763	571989	chr11	125774260	125793006	18746	NM_013264	DDX25
51	chr11	129875086	129994636	119550	chr11	129872518	129875381	2863	NR_024233	LINC00167
51	chr11	129875086	129994636	119550	chr11	129939715	130014706	74991	NR_024515	APLP2
51	chr11	129875086	129994636	119550	chr11	129939715	130014706	74991	NM_001142277	APLP2
51	chr11	129875086	129994636	119550	chr11	129939715	130014706	74991	NM_001142276	APLP2
51	chr11	129875086	129994636	119550	chr11	129939715	130014706	74991	NR_024516	APLP2
51	chr11	129875086	129994636	119550	chr11	129939715	130014706	74991	NM_001142278	APLP2
51	chr11	129875086	129994636	119550	chr11	129939715	130014706	74991	NM_001642	APLP2
51	chr11	129875086	129994636	119550	chr11	129940462	130014706	74244	NM_001243299	APLP2
52	chr11	133790196	133890245	100049	chr11	133778519	133826649	48130	NM_001277285	IGSF9B
53	chr10	677475	818192	140717	chr10	687628	687718	90	NR_049884	MIR5699
53	chr10	677475	818192	140717	chr10	320129	735608	415479	NM_014974	DIP2C
53	chr10	677475	818192	140717	chr10	696016	711109	15093	NR_027152	PRR26
53	chr10	677475	818192	140717	chr10	695887	698595	2708	NR_027151	PRR26
54	chr10	2688857	3134214	445357	chr10	3110818	3178997	68179	NM_001242339	PFKP
54	chr10	2688857	3134214	445357	chr10	3109711	3178997	69286	NM_002627	PFKP
55	chr10	3203959	3305292	101333	chr10	3179918	3215033	35115	NM_014889	PITRM1
55	chr10	3203959	3305292	101333	chr10	3179919	3215033	35114	NM_001242309	PITRM1
55	chr10	3203959	3305292	101333	chr10	3179918	3215033	35115	NM_001242307	PITRM1
56	chr10	21739527	21874334	134807	chr10	21783420	21786213	2793	NM_001010911	C10orf114
56	chr10	21739527	21874334	134807	chr10	21823573	22032559	208986	NM_001195626	MLLT10
56	chr10	21739527	21874334	134807	chr10	21823100	22032559	209459	NM_004641	MLLT10
56	chr10	21739527	21874334	134807	chr10	21785490	21785570	80	NR_031736	MIR1915
56	chr10	21739527	21874334	134807	chr10	21823100	21846114	23014	NM_001195627	MLLT10
56	chr10	21739527	21874334	134807	chr10	21802408	21814611	12203	NM_207371	SKIDA1
56	chr10	21739527	21874334	134807	chr10	21823100	21846114	23014	NM_001195630	MLLT10
56	chr10	21739527	21874334	134807	chr10	21823100	21846114	23014	NM_001195628	MLLT10
57	chr10	27541481	27750309	208828	chr10	27687116	27703297	16181	NM_001034842	PTCHD3
58	chr10	35871949	35974254	102305	chr10	35894337	35897863	3526	NM_153368	GJD4
58	chr10	35871949	35974254	102305	chr10	35927176	35930362	3186	NM_031866	FZD8
58	chr10	35871949	35974254	102305	chr10	35930099	35930180	81	NR_039831	MIR4683
59	chr10	38525085	38673630	148545	chr10	38671997	38691780	19783	NR_027269	SEPT7P9
59	chr10	38525085	38673630	148545	chr10	38645307	38667433	22126	NR_003086	HSD17B7P2
60	chr10	38888859	39076923	188064	chr10	38989726	38991371	1645	NR_045000	ACTR3BP5
61	chr10	45224603	45365534	140931	chr10	45306471	45455137	148666	NR_033842	TMEM72-AS1
62	chr10	46203279	49390721	3187442	chr10	48737041	48827581	90540	NM_001042394	PTPN20A
62	chr10	46203279	49390721	3187442	chr10	47225570	47243511	17941	NR_072978	BMS1P2
62	chr10	46203279	49390721	3187442	chr10	46550122	46640660	90538	NM_001042361	PTPN20B
62	chr10	46203279	49390721	3187442	chr10	46222647	46288412	65765	NM_015262	FAM21C
62	chr10	46203279	49390721	3187442	chr10	46550122	46641003	90881	NM_001042396	PTPN20A
62	chr10	46203279	49390721	3187442	chr10	46222647	46288412	65765	NM_001169107	FAM21C
62	chr10	46203279	49390721	3187442	chr10	46321049	46342921	21872	NM_133446	AGAP4
62	chr10	46203279	49390721	3187442	chr10	46222647	46288412	65765	NM_001169106	FAM21C
62	chr10	46203279	49390721	3187442	chr10	46550122	46640660	90538	NM_001042391	PTPN20A
62	chr10	46203279	49390721	3187442	chr10	46550122	46641003	90881	NM_015605	PTPN20B
62	chr10	46203279	49390721	3187442	chr10	46550122	46640660	90538	NM_001042393	PTPN20A
62	chr10	46203279	49390721	3187442	chr10	46550122	46641003	90881	NM_001042387	PTPN20A
62	chr10	46203279	49390721	3187442	chr10	46550122	46640660	90538	NM_001042359	PTPN20B
62	chr10	46203279	49390721	3187442	chr10	46550122	46640660	90538	NM_001042360	PTPN20B
62	chr10	46203279	49390721	3187442	chr10	46550122	46640660	90538	NM_001042358	PTPN20B
62	chr10	46203279	49390721	3187442	chr10	46550122	46620058	69936	NM_001042357	PTPN20B
62	chr10	46203279	49390721	3187442	chr10	46550122	46641003	90881	NM_001042395	PTPN20A
62	chr10	46203279	49390721	3187442	chr10	46550122	46641003	90881	NM_001042397	PTPN20A
62	chr10	46203279	49390721	3187442	chr10	46550122	46640660	90538	NM_001042390	PTPN20A
62	chr10	46203279	49390721	3187442	chr10	46955443	46970601	15158	NM_181519	SYT15
62	chr10	46203279	49390721	3187442	chr10	46550122	46640660	90538	NM_001042392	PTPN20A
62	chr10	46203279	49390721	3187442	chr10	46550122	46641003	90881	NM_001042365	PTPN20B
62	chr10	46203279	49390721	3187442	chr10	46550122	46641003	90881	NM_001042364	PTPN20B
62	chr10	46203279	49390721	3187442	chr10	46550122	46641003	90881	NM_001042363	PTPN20B
62	chr10	46203279	49390721	3187442	chr10	46550122	46640660	90538	NM_001042362	PTPN20B
62	chr10	46203279	49390721	3187442	chr10	46550122	46620058	69936	NM_001042389	PTPN20A
62	chr10	46203279	49390721	3187442	chr10	46550122	46640660	90538	NM_001042394	PTPN20A
62	chr10	46203279	49390721	3187442	chr10	46897640	46939145	41505	NR_027632	FAM35BP
62	chr10	46203279	49390721	3187442	chr10	46764667	46768346	3679	NR_048574	GLUD1P7
62	chr10	46203279	49390721	3187442	chr10	46737612	46762892	25280	NR_026566	BMS1P1
62	chr10	46203279	49390721	3187442	chr10	46737612	46762892	25280	NR_003611	BMS1P5
62	chr10	46203279	49390721	3187442	chr10	47083533	47088320	4787	NM_005972	NPY4R
62	chr10	46203279	49390721	3187442	chr10	46993545	47000568	7023	NM_014696	GPRIN2
62	chr10	46203279	49390721	3187442	chr10	46957880	46970601	12721	NM_031912	SYT15
62	chr10	46203279	49390721	3187442	chr10	47157983	47174143	16160	NM_001040084	ANXA8
62	chr10	46203279	49390721	3187442	chr10	47157983	47174143	16160	NM_001271702	ANXA8
62	chr10	46203279	49390721	3187442	chr10	47096453	47151400	54947	NR_033957	LINC00842
62	chr10	46203279	49390721	3187442	chr10	47157983	47174143	16160	NM_001271703	ANXA8
62	chr10	46203279	49390721	3187442	chr10	47133294	47133836	542	NR_003277	HNRNPA1P33
62	chr10	46203279	49390721	3187442	chr10	47157988	47174040	16052	NM_001098845	ANXA8L1
62	chr10	46203279	49390721	3187442	chr10	47177221	47181688	4467	NM_001137548	FAM25C
62	chr10	46203279	49390721	3187442	chr10	47177221	47181688	4467	NM_001137556	FAM25B
62	chr10	46203279	49390721	3187442	chr10	47177221	47181688	4467	NM_001137549	FAM25G
62	chr10	46203279	49390721	3187442	chr10	47191843	47213626	21783	NM_001190810	AGAP9
62	chr10	46203279	49390721	3187442	chr10	47225570	47243511	17941	NR_024495	BMS1P6
62	chr10	46203279	49390721	3187442	chr10	48355088	48373866	18778	NM_153034	ZNF488
62	chr10	46203279	49390721	3187442	chr10	47379719	47421238	41519	NR_027634	FAM35DP
62	chr10	46203279	49390721	3187442	chr10	47746919	47763040	16121	NM_001630	ANXA8L2
62	chr10	46203279	49390721	3187442	chr10	47894022	47949417	55395	NM_018232	FAM21B
62	chr10	46203279	49390721	3187442	chr10	48255203	48271368	16165	NM_001040084	ANXA8
62	chr10	46203279	49390721	3187442	chr10	48215723	48237508	21785	NM_001190810	AGAP9
62	chr10	46203279	49390721	3187442	chr10	48155942	48158691	2749	NR_033407	CTSL1P2
62	chr10	46203279	49390721	3187442	chr10	48185838	48203780	17942	NR_072978	BMS1P2
62	chr10	46203279	49390721	3187442	chr10	48185838	48203780	17942	NR_024495	BMS1P6
62	chr10	46203279	49390721	3187442	chr10	48247661	48252125	4464	NM_001137556	FAM25B
62	chr10	46203279	49390721	3187442	chr10	48247661	48252125	4464	NM_001137549	FAM25G
62	chr10	46203279	49390721	3187442	chr10	48255203	48271368	16165	NM_001271702	ANXA8
62	chr10	46203279	49390721	3187442	chr10	48255203	48271368	16165	NM_001271703	ANXA8
62	chr10	46203279	49390721	3187442	chr10	48247661	48252125	4464	NM_001137548	FAM25C
62	chr10	46203279	49390721	3187442	chr10	48255306	48271363	16057	NM_001098845	ANXA8L1
62	chr10	46203279	49390721	3187442	chr10	48737041	48827924	90883	NM_015605	PTPN20B
62	chr10	46203279	49390721	3187442	chr10	48381486	48390991	9505	NM_002900	RBP3
62	chr10	46203279	49390721	3187442	chr10	48413091	48416853	3762	NM_016204	GDF2
62	chr10	46203279	49390721	3187442	chr10	48425787	48439138	13351	NM_004962	GDF10
62	chr10	46203279	49390721	3187442	chr10	48737041	48827924	90883	NM_001042387	PTPN20A
62	chr10	46203279	49390721	3187442	chr10	48737041	48827581	90540	NM_001042392	PTPN20A
62	chr10	46203279	49390721	3187442	chr10	48737041	48827924	90883	NM_001042396	PTPN20A
62	chr10	46203279	49390721	3187442	chr10	48737041	48827581	90540	NM_001042393	PTPN20A
62	chr10	46203279	49390721	3187442	chr10	48737041	48806985	69944	NM_001042389	PTPN20A
62	chr10	46203279	49390721	3187442	chr10	48737041	48827581	90540	NM_001042359	PTPN20B
62	chr10	46203279	49390721	3187442	chr10	48737041	48827581	90540	NM_001042360	PTPN20B
62	chr10	46203279	49390721	3187442	chr10	48737041	48827581	90540	NM_001042358	PTPN20B
62	chr10	46203279	49390721	3187442	chr10	48737041	48827581	90540	NM_001042362	PTPN20B
62	chr10	46203279	49390721	3187442	chr10	48737041	48827581	90540	NM_001042361	PTPN20B
62	chr10	46203279	49390721	3187442	chr10	48737041	48827924	90883	NM_001042395	PTPN20A
62	chr10	46203279	49390721	3187442	chr10	48737041	48827581	90540	NM_001042390	PTPN20A
62	chr10	46203279	49390721	3187442	chr10	48737041	48806985	69944	NM_001042357	PTPN20B
62	chr10	46203279	49390721	3187442	chr10	49203372	49207825	4453	NM_001137548	FAM25C
62	chr10	46203279	49390721	3187442	chr10	48927373	48952629	25256	NR_003611	BMS1P5
62	chr10	46203279	49390721	3187442	chr10	48737041	48827581	90540	NM_001042391	PTPN20A
62	chr10	46203279	49390721	3187442	chr10	48737041	48827924	90883	NM_001042364	PTPN20B
62	chr10	46203279	49390721	3187442	chr10	48737041	48827924	90883	NM_001042363	PTPN20B
62	chr10	46203279	49390721	3187442	chr10	48737041	48827924	90883	NM_001042397	PTPN20A
62	chr10	46203279	49390721	3187442	chr10	48737041	48827924	90883	NM_001042365	PTPN20B
62	chr10	46203279	49390721	3187442	chr10	48844035	48862688	18653	NR_033172	FRMPD2P1
62	chr10	46203279	49390721	3187442	chr10	49203372	49207825	4453	NM_001137556	FAM25B
62	chr10	46203279	49390721	3187442	chr10	49203372	49207825	4453	NM_001137549	FAM25G
62	chr10	46203279	49390721	3187442	chr10	48927373	48952629	25256	NR_026566	BMS1P1
62	chr10	46203279	49390721	3187442	chr10	48954404	48958083	3679	NR_048574	GLUD1P7
62	chr10	46203279	49390721	3187442	chr10	49364600	49383240	18640	NR_033172	FRMPD2P1
62	chr10	46203279	49390721	3187442	chr10	49218158	49239658	21500	NR_029396	LOC399753
62	chr10	46203279	49390721	3187442	chr10	49364601	49482941	118340	NM_001018071	FRMPD2
62	chr10	46203279	49390721	3187442	chr10	49364601	49383186	18585	NM_001042512	FRMPD2
63	chr10	51051465	51506458	454993	chr10	51224680	51246409	21729	NM_001276343	AGAP8
63	chr10	51051465	51506458	454993	chr10	51026324	51371331	345007	NM_003631	PARG
63	chr10	51051465	51506458	454993	chr10	51224680	51246409	21729	NM_001077686	AGAP8
63	chr10	51051465	51506458	454993	chr10	51224680	51246409	21729	NM_001276344	AGAP8
63	chr10	51051465	51506458	454993	chr10	51253907	51371316	117409	NR_029388	LOC728407
63	chr10	51051465	51506458	454993	chr10	51464150	51486327	22177	NM_001077685	AGAP7
64	chr10	51868172	52009922	141750	chr10	51827683	51893269	65586	NM_001005751	FAM21A
64	chr10	51868172	52009922	141750	chr10	51946999	52008370	61371	NM_019893	ASAH2
64	chr10	51868172	52009922	141750	chr10	51837885	51893269	55384	NM_018232	FAM21B
64	chr10	51868172	52009922	141750	chr10	51946999	52008370	61371	NM_001143974	ASAH2
65	chr10	55864303	56047721	183418	chr10	55580859	56561051	980192	NM_001142764	PCDH15
65	chr10	55864303	56047721	183418	chr10	55580859	56561051	980192	NM_001142763	PCDH15
65	chr10	55864303	56047721	183418	chr10	55562532	56561051	998519	NM_001142771	PCDH15
65	chr10	55864303	56047721	183418	chr10	55562532	56561051	998519	NM_001142772	PCDH15
65	chr10	55864303	56047721	183418	chr10	55568451	56561051	992600	NM_001142770	PCDH15
65	chr10	55864303	56047721	183418	chr10	55568451	56561051	992600	NM_001142769	PCDH15
65	chr10	55864303	56047721	183418	chr10	55580859	56561051	980192	NM_001142773	PCDH15
65	chr10	55864303	56047721	183418	chr10	55580859	56561051	980192	NM_001142768	PCDH15
65	chr10	55864303	56047721	183418	chr10	55580859	56561051	980192	NM_033056	PCDH15
65	chr10	55864303	56047721	183418	chr10	55580859	56561051	980192	NM_001142767	PCDH15
65	chr10	55864303	56047721	183418	chr10	55580859	56561051	980192	NM_001142766	PCDH15
65	chr10	55864303	56047721	183418	chr10	55580859	56561051	980192	NM_001142765	PCDH15
66	chr10	63684362	64372023	687661	chr10	64280206	64431771	151565	NM_199452	ZNF365
66	chr10	63684362	64372023	687661	chr10	63952952	64028466	75514	NM_145307	RTKN2
66	chr10	63684362	64372023	687661	chr10	63736060	63736088	28	NR_049858	MIR548AV
66	chr10	63684362	64372023	687661	chr10	63661012	63856707	195695	NM_032199	ARID5B
66	chr10	63684362	64372023	687661	chr10	63808969	63856707	47738	NM_001244638	ARID5B
66	chr10	63684362	64372023	687661	chr10	64133915	64162217	28302	NM_014951	ZNF365
66	chr10	63684362	64372023	687661	chr10	64133915	64431771	297856	NM_199451	ZNF365
66	chr10	63684362	64372023	687661	chr10	64133915	64240048	106133	NM_199450	ZNF365
67	chr10	71257912	72546770	1288858	chr10	71561643	71718904	157261	NM_080801	COL13A1
67	chr10	71257912	72546770	1288858	chr10	71561643	71718904	157261	NM_080800	COL13A1
67	chr10	71257912	72546770	1288858	chr10	71561643	71718904	157261	NM_080805	COL13A1
67	chr10	71257912	72546770	1288858	chr10	71331790	71333210	1420	NM_020999	NEUROG3
67	chr10	71257912	72546770	1288858	chr10	71211225	71267423	56198	NM_012339	TSPAN15
67	chr10	71257912	72546770	1288858	chr10	71390002	71393355	3353	NM_145306	C10orf35
67	chr10	71257912	72546770	1288858	chr10	71561643	71718904	157261	NM_080798	COL13A1
67	chr10	71257912	72546770	1288858	chr10	71561643	71718904	157261	NM_001130103	COL13A1
67	chr10	71257912	72546770	1288858	chr10	71897736	71906496	8760	NR_073591	TYSND1
67	chr10	71257912	72546770	1288858	chr10	71897736	71906496	8760	NR_073582	TYSND1
67	chr10	71257912	72546770	1288858	chr10	71897736	71906496	8760	NR_073580	TYSND1
67	chr10	71257912	72546770	1288858	chr10	71897736	71906496	8760	NR_073594	TYSND1
67	chr10	71257912	72546770	1288858	chr10	71561643	71718904	157261	NM_080802	COL13A1
67	chr10	71257912	72546770	1288858	chr10	71812356	71872040	59684	NM_018649	H2AFY2
67	chr10	71257912	72546770	1288858	chr10	71872022	71892690	20668	NM_001198696	AIFM2
67	chr10	71257912	72546770	1288858	chr10	71872022	71892690	20668	NM_032797	AIFM2
67	chr10	71257912	72546770	1288858	chr10	71897736	71904484	6748	NR_073595	TYSND1
67	chr10	71257912	72546770	1288858	chr10	71897736	71906496	8760	NR_073581	TYSND1
67	chr10	71257912	72546770	1288858	chr10	72058725	72142406	83681	NM_001278211	LRRC20
67	chr10	71257912	72546770	1288858	chr10	71909960	71930285	20325	NM_001142648	SAR1A
67	chr10	71257912	72546770	1288858	chr10	71897736	71906496	8760	NR_073593	TYSND1
67	chr10	71257912	72546770	1288858	chr10	71897736	71906496	8760	NR_073592	TYSND1
67	chr10	71257912	72546770	1288858	chr10	71897736	71906496	8760	NM_173555	TYSND1
67	chr10	71257912	72546770	1288858	chr10	71897736	71906496	8760	NM_001040273	TYSND1
67	chr10	71257912	72546770	1288858	chr10	72058725	72136535	77810	NM_001278213	LRRC20
67	chr10	71257912	72546770	1288858	chr10	71909960	71930285	20325	NM_020150	SAR1A
67	chr10	71257912	72546770	1288858	chr10	71962585	71993190	30605	NM_021129	PPA1
67	chr10	71257912	72546770	1288858	chr10	72014712	72043450	28738	NM_022146	NPFFR1
67	chr10	71257912	72546770	1288858	chr10	72058725	72142406	83681	NM_001278212	LRRC20
67	chr10	71257912	72546770	1288858	chr10	72058725	72142406	83681	NR_103467	LRRC20
67	chr10	71257912	72546770	1288858	chr10	72058725	72142406	83681	NM_018205	LRRC20
67	chr10	71257912	72546770	1288858	chr10	72058725	72142406	83681	NM_001278214	LRRC20
67	chr10	71257912	72546770	1288858	chr10	72058725	72142406	83681	NM_018239	LRRC20
67	chr10	71257912	72546770	1288858	chr10	72058725	72142406	83681	NR_103468	LRRC20
67	chr10	71257912	72546770	1288858	chr10	72432558	72522195	89637	NM_080722	ADAMTS14
67	chr10	71257912	72546770	1288858	chr10	72058725	72141670	82945	NM_207119	LRRC20
67	chr10	71257912	72546770	1288858	chr10	72432558	72522195	89637	NM_139155	ADAMTS14
67	chr10	71257912	72546770	1288858	chr10	72163860	72188374	24514	NM_004096	EIF4EBP2
67	chr10	71257912	72546770	1288858	chr10	72191691	72201465	9774	NM_018055	NODAL
67	chr10	71257912	72546770	1288858	chr10	72238563	72328206	89643	NM_014431	PALD1
67	chr10	71257912	72546770	1288858	chr10	72357103	72362531	5428	NM_001083116	PRF1
67	chr10	71257912	72546770	1288858	chr10	72357103	72362531	5428	NM_005041	PRF1
67	chr10	71257912	72546770	1288858	chr10	72530994	72545157	14163	NM_152710	TBATA
68	chr10	75475447	75682321	206874	chr10	75572258	75634349	62091	NM_001222	CAMK2G
68	chr10	75475447	75682321	206874	chr10	75545381	75561556	16175	NM_001242488	ZSWIM8
68	chr10	75475447	75682321	206874	chr10	75545381	75561556	16175	NM_001242487	ZSWIM8
68	chr10	75475447	75682321	206874	chr10	75545381	75561556	16175	NM_015037	ZSWIM8
68	chr10	75475447	75682321	206874	chr10	75541807	75543406	1599	NM_203298	CHCHD1
68	chr10	75475447	75682321	206874	chr10	75458908	75490272	31364	NR_026592	BMS1P4
68	chr10	75475447	75682321	206874	chr10	75491298	75495367	4069	NR_048575	GLUD1P3
68	chr10	75475447	75682321	206874	chr10	75532048	75535976	3928	NM_173540	FUT11
68	chr10	75475447	75682321	206874	chr10	75504130	75531933	27803	NM_004922	SEC24C
68	chr10	75475447	75682321	206874	chr10	75504130	75531933	27803	NM_198597	SEC24C
68	chr10	75475447	75682321	206874	chr10	75572258	75634349	62091	NM_001204492	CAMK2G
68	chr10	75475447	75682321	206874	chr10	75572258	75634349	62091	NM_172173	CAMK2G
68	chr10	75475447	75682321	206874	chr10	75572258	75634349	62091	NM_172171	CAMK2G
68	chr10	75475447	75682321	206874	chr10	75556271	75561157	4886	NR_038357	ZSWIM8-AS1
68	chr10	75475447	75682321	206874	chr10	75572258	75634349	62091	NM_172170	CAMK2G
68	chr10	75475447	75682321	206874	chr10	75572258	75634349	62091	NM_172169	CAMK2G
68	chr10	75475447	75682321	206874	chr10	75561668	75571589	9921	NM_003635	NDST2
68	chr10	75475447	75682321	206874	chr10	75670861	75677258	6397	NM_001145031	PLAU
68	chr10	75475447	75682321	206874	chr10	75669726	75682535	12809	NM_001001791	C10orf55
68	chr10	75475447	75682321	206874	chr10	75670861	75677258	6397	NM_002658	PLAU
69	chr10	77544175	77702065	157890	chr10	77542518	78317126	774608	NM_032024	C10orf11
70	chr10	81273515	81561458	287943	chr10	81370694	81375199	4505	NM_001164646	SFTPA1
70	chr10	81273515	81561458	287943	chr10	81315607	81320163	4556	NM_001098668	SFTPA2
70	chr10	81273515	81561458	287943	chr10	81272356	81276192	3836	NM_001099692	EIF5AL1
70	chr10	81273515	81561458	287943	chr10	81370694	81375199	4505	NM_001164645	SFTPA1
70	chr10	81273515	81561458	287943	chr10	81370694	81375199	4505	NM_001164644	SFTPA1
70	chr10	81273515	81561458	287943	chr10	81370694	81375199	4505	NM_005411	SFTPA1
70	chr10	81273515	81561458	287943	chr10	81370694	81375199	4505	NM_001093770	SFTPA1
70	chr10	81273515	81561458	287943	chr10	81370694	81375199	4505	NM_001164647	SFTPA1
70	chr10	81273515	81561458	287943	chr10	81442730	81448650	5920	NR_027512	BEND3P3
71	chr10	88868903	89129075	260172	chr10	88854952	88951222	96270	NM_019054	FAM35A
71	chr10	88868903	89129075	260172	chr10	88985204	88994733	9529	NM_001099338	NUTM2A
71	chr10	88868903	89129075	260172	chr10	89117476	89130452	12976	NR_075100	NUTM2D
71	chr10	88868903	89129075	260172	chr10	89102167	89103331	1164	NR_029408	LOC439994
71	chr10	88868903	89129075	260172	chr10	88998423	89102315	103892	NR_024397	NUTM2A-AS1
72	chr10	89149588	89260394	110806	chr10	89156330	89167457	11127	NR_046091	LINC00864
73	chr10	96856006	97074756	218750	chr10	97071529	97200937	129408	NM_001034956	SORBS1
73	chr10	96856006	97074756	218750	chr10	97071529	97321171	249642	NM_024991	SORBS1
73	chr10	96856006	97074756	218750	chr10	96953956	96988686	34730	NM_207321	C10orf129
73	chr10	96856006	97074756	218750	chr10	96997324	97050905	53581	NM_020992	PDLIM1
73	chr10	96856006	97074756	218750	chr10	97071529	97321171	249642	NM_015385	SORBS1
73	chr10	96856006	97074756	218750	chr10	97071529	97200937	129408	NM_001034955	SORBS1
73	chr10	96856006	97074756	218750	chr10	97071529	97200937	129408	NM_001034954	SORBS1
73	chr10	96856006	97074756	218750	chr10	97071529	97200937	129408	NM_006434	SORBS1
73	chr10	96856006	97074756	218750	chr10	97071529	97200937	129408	NM_001034957	SORBS1
74	chr10	121407592	121521043	113451	chr10	121485558	121588662	103104	NM_014937	INPP5F
74	chr10	121407592	121521043	113451	chr10	121485558	121551720	66162	NM_001243195	INPP5F
74	chr10	121407592	121521043	113451	chr10	121410881	121437329	26448	NM_004281	BAG3
75	chr10	133727568	133870219	142651	chr10	133781203	133795435	14232	NM_004052	BNIP3
75	chr10	133727568	133870219	142651	chr10	133747959	133770053	22094	NM_018461	PPP2R2D
75	chr10	133727568	133870219	142651	chr10	133747959	133770053	22094	NR_033191	PPP2R2D
76	chr10	135235414	135515044	279630	chr10	135493785	135498458	4673	NM_012147	DUX2
76	chr10	135235414	135515044	279630	chr10	135438602	135440299	1697	NM_001080998	FRG2B
76	chr10	135235414	135515044	279630	chr10	135368347	135379138	10791	NM_001143764	SYCE1
76	chr10	135235414	135515044	279630	chr10	135234169	135238121	3952	NM_001012508	SPRN
76	chr10	135235414	135515044	279630	chr10	135367403	135382876	15473	NM_130784	SYCE1
76	chr10	135235414	135515044	279630	chr10	135367403	135379138	11735	NM_001143763	SYCE1
76	chr10	135235414	135515044	279630	chr10	135340866	135352620	11754	NM_000773	CYP2E1
76	chr10	135235414	135515044	279630	chr10	135267431	135281953	14522	NR_002934	LOC619207
76	chr10	135235414	135515044	279630	chr10	135380437	135383462	3025	NR_033789	SPRNP1
76	chr10	135235414	135515044	279630	chr10	135480557	135485241	4684	NM_001127387	DUX4L7
76	chr10	135235414	135515044	279630	chr10	135480557	135485241	4684	NM_001127388	DUX4L6
76	chr10	135235414	135515044	279630	chr10	135480557	135485241	4684	NM_001127389	DUX4L5
76	chr10	135235414	135515044	279630	chr10	135480557	135485241	4684	NM_001278056	LOC100653046
76	chr10	135235414	135515044	279630	chr10	135480557	135485241	4684	NM_012147	DUX2
76	chr10	135235414	135515044	279630	chr10	135480557	135485241	4684	NM_033178	DUX4
76	chr10	135235414	135515044	279630	chr10	135480557	135485241	4684	NM_001164467	DUX4L3
76	chr10	135235414	135515044	279630	chr10	135487176	135491849	4673	NM_001127387	DUX4L7
76	chr10	135235414	135515044	279630	chr10	135480557	135485241	4684	NM_001127386	DUX4L2
76	chr10	135235414	135515044	279630	chr10	135487176	135491849	4673	NM_001127388	DUX4L6
76	chr10	135235414	135515044	279630	chr10	135487176	135491849	4673	NM_001127389	DUX4L5
76	chr10	135235414	135515044	279630	chr10	135487176	135491849	4673	NM_001164467	DUX4L3
76	chr10	135235414	135515044	279630	chr10	135487176	135491849	4673	NM_001278056	LOC100653046
76	chr10	135235414	135515044	279630	chr10	135487176	135491849	4673	NM_033178	DUX4
76	chr10	135235414	135515044	279630	chr10	135487176	135491849	4673	NM_001127386	DUX4L2
76	chr10	135235414	135515044	279630	chr10	135493785	135498458	4673	NM_033178	DUX4
76	chr10	135235414	135515044	279630	chr10	135493785	135498458	4673	NM_001278056	LOC100653046
76	chr10	135235414	135515044	279630	chr10	135493785	135498458	4673	NM_001127386	DUX4L2
76	chr10	135235414	135515044	279630	chr10	135493785	135498458	4673	NM_001127388	DUX4L6
76	chr10	135235414	135515044	279630	chr10	135493785	135498458	4673	NM_001127389	DUX4L5
76	chr10	135235414	135515044	279630	chr10	135493785	135498458	4673	NM_001164467	DUX4L3
76	chr10	135235414	135515044	279630	chr10	135493785	135498458	4673	NM_001127387	DUX4L7
77	chr17	182185	295622	113437	chr17	62179	202633	140454	NM_001190413	RPH3AL
77	chr17	182185	295622	113437	chr17	62179	202633	140454	NM_006987	RPH3AL
77	chr17	182185	295622	113437	chr17	62179	202633	140454	NM_001190412	RPH3AL
77	chr17	182185	295622	113437	chr17	180995	183279	2284	NM_001242780	LOC100506388
77	chr17	182185	295622	113437	chr17	180995	183279	2284	NR_040011	LOC100506388
77	chr17	182185	295622	113437	chr17	62179	202633	140454	NM_001190411	RPH3AL
77	chr17	182185	295622	113437	chr17	260117	264457	4340	NM_001013672	C17orf97
77	chr17	182185	295622	113437	chr17	289770	295731	5961	NM_182705	FAM101B
78	chr17	854063	1172798	318735	chr17	906757	1083166	176409	NM_021962	ABR
78	chr17	854063	1172798	318735	chr17	702552	882998	180446	NM_022463	NXN
78	chr17	854063	1172798	318735	chr17	906757	1012340	105583	NM_001092	ABR
78	chr17	854063	1172798	318735	chr17	906757	935078	28321	NM_001256847	ABR
78	chr17	854063	1172798	318735	chr17	906757	982386	75629	NR_046393	ABR
78	chr17	854063	1172798	318735	chr17	900356	905390	5034	NM_013337	TIMM22
78	chr17	854063	1172798	318735	chr17	906757	1090616	183859	NM_001159746	ABR
78	chr17	854063	1172798	318735	chr17	925715	925799	84	NR_036148	MIR3183
79	chr17	1579595	1963823	384228	chr17	1619816	1641893	22077	NM_001163673	WDR81
79	chr17	1579595	1963823	384228	chr17	1553922	1588176	34254	NM_006445	PRPF8
79	chr17	1579595	1963823	384228	chr17	1606083	1613662	7579	NM_001164407	TLCD2
79	chr17	1579595	1963823	384228	chr17	1614797	1619566	4769	NR_028503	MIR22HG
79	chr17	1579595	1963823	384228	chr17	1614797	1619566	4769	NR_028502	MIR22HG
79	chr17	1579595	1963823	384228	chr17	1617196	1617281	85	NR_029494	MIR22
79	chr17	1579595	1963823	384228	chr17	1614797	1619566	4769	NR_028505	MIR22HG
79	chr17	1579595	1963823	384228	chr17	1614797	1619566	4769	NR_028504	MIR22HG
79	chr17	1579595	1963823	384228	chr17	1646129	1658559	12430	NM_001165921	SERPINF2
79	chr17	1579595	1963823	384228	chr17	1646129	1658559	12430	NM_000934	SERPINF2
79	chr17	1579595	1963823	384228	chr17	1619816	1641893	22077	NM_152348	WDR81
79	chr17	1579595	1963823	384228	chr17	1627833	1641893	14060	NM_001163811	WDR81
79	chr17	1579595	1963823	384228	chr17	1628124	1641893	13769	NM_001163809	WDR81
79	chr17	1579595	1963823	384228	chr17	1837970	1928178	90208	NM_178568	RTN4RL1
79	chr17	1579595	1963823	384228	chr17	1682828	1733175	50347	NM_052928	SMYD4
79	chr17	1579595	1963823	384228	chr17	1646319	1658559	12240	NM_001165920	SERPINF2
79	chr17	1579595	1963823	384228	chr17	1665258	1680859	15601	NM_002615	SERPINF1
79	chr17	1579595	1963823	384228	chr17	1733272	1802848	69576	NM_002945	RPA1
79	chr17	1579595	1963823	384228	chr17	1953201	1953302	101	NR_029674	MIR132
79	chr17	1579595	1963823	384228	chr17	1933430	1946725	13295	NM_001383	DPH1
79	chr17	1579595	1963823	384228	chr17	1945276	1946725	1449	NM_080822	OVCA2
79	chr17	1579595	1963823	384228	chr17	1959603	1962981	3378	NM_001098202	HIC1
79	chr17	1579595	1963823	384228	chr17	1958392	1962981	4589	NM_006497	HIC1
79	chr17	1579595	1963823	384228	chr17	1953564	1953674	110	NR_029625	MIR212
79	chr17	1579595	1963823	384228	chr17	1963132	2140141	177009	NM_001256828	SMG6
79	chr17	1579595	1963823	384228	chr17	1963132	2169493	206361	NM_001256827	SMG6
79	chr17	1579595	1963823	384228	chr17	1963132	2207069	243937	NM_017575	SMG6
79	chr17	1579595	1963823	384228	chr17	1963132	1992055	28923	NR_046385	SMG6
80	chr17	9252593	9356181	103588	chr17	9153787	9479275	325488	NR_033656	STX8
80	chr17	9252593	9356181	103588	chr17	9153787	9479275	325488	NM_004853	STX8
81	chr17	18253785	19195216	941431	chr17	19030781	19062148	31367	NM_001129778	GRAPL
81	chr17	18253785	19195216	941431	chr17	18231186	18266856	35670	NM_148918	SHMT1
81	chr17	18253785	19195216	941431	chr17	18414575	18424566	9991	NR_003554	USP32P2
81	chr17	18253785	19195216	941431	chr17	18231186	18266856	35670	NM_004169	SHMT1
81	chr17	18253785	19195216	941431	chr17	18343221	18346208	2987	NR_073414	KRT16P1
81	chr17	18253785	19195216	941431	chr17	18325494	18328647	3153	NR_001443	LOC339240
81	chr17	18253785	19195216	941431	chr17	18281078	18292960	11882	NM_001145127	EVPLL
81	chr17	18253785	19195216	941431	chr17	18380098	18398259	18161	NM_001040078	LGALS9C
81	chr17	18253785	19195216	941431	chr17	18538841	18547740	8899	NM_001039397	TBC1D28
81	chr17	18253785	19195216	941431	chr17	18441114	18528930	87816	NR_036647	CCDC144B
81	chr17	18253785	19195216	941431	chr17	18427879	18430160	2281	NR_026809	FAM106A
81	chr17	18253785	19195216	941431	chr17	18569235	18576494	7259	NR_026718	FOXO3B
81	chr17	18253785	19195216	941431	chr17	18561741	18585572	23831	NM_001145045	ZNF286B
81	chr17	18253785	19195216	941431	chr17	18647325	18682662	35337	NM_001267585	FBXW10
81	chr17	18253785	19195216	941431	chr17	18625401	18639431	14030	NM_001037330	TRIM16L
81	chr17	18253785	19195216	941431	chr17	18684581	18710026	25445	NM_016078	TVP23B
81	chr17	18253785	19195216	941431	chr17	18647325	18682662	35337	NR_051988	FBXW10
81	chr17	18253785	19195216	941431	chr17	18647325	18682662	35337	NM_001267586	FBXW10
81	chr17	18253785	19195216	941431	chr17	18768781	18834599	65818	NM_001243940	PRPSAP2
81	chr17	18253785	19195216	941431	chr17	18759611	18834599	74988	NM_001243936	PRPSAP2
81	chr17	18253785	19195216	941431	chr17	18761380	18834599	73219	NM_002767	PRPSAP2
81	chr17	18253785	19195216	941431	chr17	18759611	18834599	74988	NM_001243942	PRPSAP2
81	chr17	18253785	19195216	941431	chr17	18761380	18834599	73219	NM_001243941	PRPSAP2
81	chr17	18253785	19195216	941431	chr17	18855477	18924004	68527	NM_001042450	SLC5A10
81	chr17	18253785	19195216	941431	chr17	18853988	18924004	70016	NR_073067	SLC5A10
81	chr17	18253785	19195216	941431	chr17	18855477	18924004	68527	NM_001270649	SLC5A10
81	chr17	18253785	19195216	941431	chr17	18855477	18924004	68527	NM_152351	SLC5A10
81	chr17	18253785	19195216	941431	chr17	18855477	18924004	68527	NM_001270648	SLC5A10
81	chr17	18253785	19195216	941431	chr17	18874380	18908060	33680	NM_001039999	FAM83G
81	chr17	18253785	19195216	941431	chr17	18923989	18950336	26347	NM_006613	GRAP
81	chr17	18253785	19195216	941431	chr17	19140689	19240028	99339	NM_014964	EPN2
81	chr17	18253785	19195216	941431	chr17	19140689	19240028	99339	NM_148921	EPN2
81	chr17	18253785	19195216	941431	chr17	19174705	19177701	2996	NR_046824	EPN2-IT1
81	chr17	18253785	19195216	941431	chr17	19140689	19240028	99339	NM_001102664	EPN2
82	chr17	20089209	20492036	402827	chr17	19912648	20218072	305424	NM_001243439	SPECC1
82	chr17	20089209	20492036	402827	chr17	20224486	20305504	81018	NR_023380	CCDC144CP
82	chr17	20089209	20492036	402827	chr17	20059306	20142743	83437	NM_001243438	SPECC1
82	chr17	20089209	20492036	402827	chr17	19990334	20218072	227738	NM_001033553	SPECC1
82	chr17	20089209	20492036	402827	chr17	19990334	20142743	152409	NM_152904	SPECC1
82	chr17	20089209	20492036	402827	chr17	20059306	20218072	158766	NM_001033555	SPECC1
82	chr17	20089209	20492036	402827	chr17	20059306	20142743	83437	NM_001033554	SPECC1
82	chr17	20089209	20492036	402827	chr17	20483036	20484224	1188	NM_001190790	CDRT15L2
82	chr17	20089209	20492036	402827	chr17	20404826	20407811	2985	NR_029393	KRT16P3
82	chr17	20089209	20492036	402827	chr17	20353175	20370848	17673	NM_001042685	LGALS9B
83	chr17	21340451	21534165	193714	chr17	21431570	21454941	23371	NM_001113434	C17orf51
84	chr17	28874663	29090724	216061	chr17	28903482	28964484	61002	NR_015341	LRRC37BP1
84	chr17	28874663	29090724	216061	chr17	28886583	28890509	3926	NM_015594	TBC1D29
84	chr17	28874663	29090724	216061	chr17	28951335	28953825	2490	NR_033420	SH3GL1P2
84	chr17	28874663	29090724	216061	chr17	29036625	29097068	60443	NR_024187	SUZ12P1
85	chr17	31741680	31902485	160805	chr17	31340105	32483825	1143720	NM_001094	ASIC2
85	chr17	31741680	31902485	160805	chr17	31856805	31860779	3974	NR_037584	AA06
86	chr17	32864048	33034410	170362	chr17	32901141	32906388	5247	NM_207454	C17orf102
86	chr17	32864048	33034410	170362	chr17	32907767	32966337	58570	NM_207313	TMEM132E
87	chr17	34405924	34815111	409187	chr17	34431219	34433014	1795	NM_002984	CCL4
87	chr17	34405924	34815111	409187	chr17	34415602	34417506	1904	NM_002983	CCL3
87	chr17	34405924	34815111	409187	chr17	34640033	34641840	1807	NM_001001435	CCL4L1
87	chr17	34405924	34815111	409187	chr17	34538467	34540274	1807	NM_207007	CCL4L2
87	chr17	34405924	34815111	409187	chr17	34522267	34524147	1880	NM_001001437	CCL3L3
87	chr17	34405924	34815111	409187	chr17	34493060	34503988	10928	NM_001001417	TBC1D3B
87	chr17	34405924	34815111	409187	chr17	34522267	34524156	1889	NM_021006	CCL3L1
87	chr17	34405924	34815111	409187	chr17	34538467	34540274	1807	NM_001001435	CCL4L1
87	chr17	34405924	34815111	409187	chr17	34581084	34592032	10948	NM_001001418	TBC1D3C
87	chr17	34405924	34815111	409187	chr17	34623841	34625721	1880	NM_001001437	CCL3L3
87	chr17	34405924	34815111	409187	chr17	34623841	34625730	1889	NM_021006	CCL3L1
87	chr17	34405924	34815111	409187	chr17	34640033	34641840	1807	NM_207007	CCL4L2
87	chr17	34405924	34815111	409187	chr17	34797174	34808103	10929	NM_001040282	TBC1D3G
87	chr17	34405924	34815111	409187	chr17	34745935	34757050	11115	NM_001123392	TBC1D3H
88	chr17	36249522	36514653	265131	chr17	36452988	36479101	26113	NM_001278279	MRPL45
88	chr17	36249522	36514653	265131	chr17	36337710	36348666	10956	NM_032258	TBC1D3F
88	chr17	36249522	36514653	265131	chr17	36337527	36348666	11139	NM_001123391	TBC1D3
88	chr17	36249522	36514653	265131	chr17	36283959	36295098	11139	NM_001123391	TBC1D3
88	chr17	36249522	36514653	265131	chr17	36283959	36294915	10956	NM_032258	TBC1D3F
88	chr17	36249522	36514653	265131	chr17	36351795	36413256	61461	NR_036750	LOC440434
88	chr17	36249522	36514653	265131	chr17	36452988	36479101	26113	NM_032351	MRPL45
88	chr17	36249522	36514653	265131	chr17	36508006	36561846	53840	NM_014598	SOCS7
88	chr17	36249522	36514653	265131	chr17	36481492	36499693	18201	NM_001004334	GPR179
89	chr17	39162685	39290020	127335	chr17	39210750	39211463	713	NM_033032	KRTAP2-2
89	chr17	39162685	39290020	127335	chr17	39196810	39197713	903	NM_030967	KRTAP1-1
89	chr17	39162685	39290020	127335	chr17	39190136	39191107	971	NM_030966	KRTAP1-3
89	chr17	39162685	39290020	127335	chr17	39185928	39186377	449	NM_001257305	KRTAP1-4
89	chr17	39162685	39290020	127335	chr17	39164773	39165366	593	NM_031958	KRTAP3-1
89	chr17	39162685	39290020	127335	chr17	39182278	39183454	1176	NM_031957	KRTAP1-5
89	chr17	39162685	39290020	127335	chr17	39202795	39203568	773	NM_001123387	KRTAP2-1
89	chr17	39162685	39290020	127335	chr17	39240458	39241396	938	NM_033061	KRTAP4-7
89	chr17	39162685	39290020	127335	chr17	39221367	39222131	764	NM_033184	KRTAP2-4
89	chr17	39162685	39290020	127335	chr17	39215492	39216344	852	NM_001165252	KRTAP2-3
89	chr17	39162685	39290020	127335	chr17	39261640	39262740	1100	NM_001146041	KRTAP4-9
89	chr17	39162685	39290020	127335	chr17	39253233	39254375	1142	NM_031960	KRTAP4-8
89	chr17	39162685	39290020	127335	chr17	39279344	39280419	1075	NM_031854	KRTAP4-12
89	chr17	39162685	39290020	127335	chr17	39273433	39274606	1173	NM_033059	KRTAP4-11
90	chr17	39644703	39786593	141890	chr17	39705857	39710747	4890	NR_038442	LOC147093
90	chr17	39644703	39786593	141890	chr17	39657232	39661865	4633	NM_153490	KRT13
90	chr17	39644703	39786593	141890	chr17	39642387	39646116	3729	NM_003771	KRT36
90	chr17	39644703	39786593	141890	chr17	39679868	39684641	4773	NM_002276	KRT19
90	chr17	39644703	39786593	141890	chr17	39669996	39675270	5274	NM_002275	KRT15
90	chr17	39644703	39786593	141890	chr17	39657232	39661865	4633	NM_002274	KRT13
90	chr17	39644703	39786593	141890	chr17	39738530	39743147	4617	NM_000526	KRT14
90	chr17	39644703	39786593	141890	chr17	39722093	39728310	6217	NM_000226	KRT9
90	chr17	39644703	39786593	141890	chr17	39782578	39796451	13873	NR_033415	KRT42P
90	chr17	39644703	39786593	141890	chr17	39775691	39780882	5191	NM_000422	KRT17
90	chr17	39644703	39786593	141890	chr17	39766030	39769079	3049	NM_005557	KRT16
91	chr17	43558172	43711700	153528	chr17	43513265	43568146	54881	NR_027774	PLEKHM1
91	chr17	43558172	43711700	153528	chr17	43513265	43568146	54881	NM_014798	PLEKHM1
91	chr17	43558172	43711700	153528	chr17	43697709	43913194	215485	NM_001256299	CRHR1
91	chr17	43558172	43711700	153528	chr17	43513265	43568146	54881	NR_027782	PLEKHM1
91	chr17	43558172	43711700	153528	chr17	43583248	43597889	14641	NR_002940	LRRC37A4P
91	chr17	43558172	43711700	153528	chr17	43677490	43679748	2258	NR_026901	LOC644172
91	chr17	43558172	43711700	153528	chr17	43697711	43715329	17618	NR_026680	MGC57346
91	chr17	43558172	43711700	153528	chr17	43697980	43715329	17349	NR_027295	MGC57346
92	chr17	44160390	44787663	627273	chr17	44450178	44500463	50285	NR_033799	NSFP1
92	chr17	44160390	44787663	627273	chr17	44376912	44439134	62222	NM_001103154	ARL17B
92	chr17	44160390	44787663	627273	chr17	44270938	44274089	3151	NR_034172	KANSL1-AS1
92	chr17	44160390	44787663	627273	chr17	44107281	44270272	162991	NM_015443	KANSL1
92	chr17	44160390	44787663	627273	chr17	44107281	44270166	162885	NM_001193466	KANSL1
92	chr17	44160390	44787663	627273	chr17	44107281	44302740	195459	NM_001193465	KANSL1
92	chr17	44160390	44787663	627273	chr17	44372496	44415160	42664	NM_014834	LRRC37A
92	chr17	44160390	44787663	627273	chr17	44376499	44439163	62664	NM_016632	ARL17A
92	chr17	44160390	44787663	627273	chr17	44412267	44439163	26896	NM_001113738	ARL17A
92	chr17	44160390	44787663	627273	chr17	44416763	44439134	22371	NM_001039083	ARL17B
92	chr17	44160390	44787663	627273	chr17	44668099	44718040	49941	NR_033799	NSFP1
92	chr17	44160390	44787663	627273	chr17	44630121	44657088	26967	NM_001113738	ARL17A
92	chr17	44160390	44787663	627273	chr17	44594067	44657088	63021	NM_016632	ARL17A
92	chr17	44160390	44787663	627273	chr17	44590075	44633014	42939	NM_001006607	LRRC37A2
92	chr17	44160390	44787663	627273	chr17	44668034	44834828	166794	NM_006178	NSF
92	chr17	44160390	44787663	627273	chr17	44668034	44834828	166794	NR_040116	NSF
93	chr17	45550420	45668683	118263	chr17	45608443	45700642	92199	NM_006310	NPEPPS
93	chr17	45550420	45668683	118263	chr17	45527592	45569986	42394	NR_033934	MRPL45P2
94	chr17	49979521	50136464	156943	chr17	49707673	50236132	528459	NM_020178	CA10
94	chr17	49979521	50136464	156943	chr17	49707673	50237161	529488	NM_001082533	CA10
94	chr17	49979521	50136464	156943	chr17	49707673	50237377	529704	NM_001082534	CA10
95	chr17	54711915	55079556	367641	chr17	55055467	55084129	28662	NM_021626	SCPEP1
95	chr17	54711915	55079556	367641	chr17	54965269	54991409	26140	NM_005082	TRIM25
95	chr17	54711915	55079556	367641	chr17	54911459	54946036	34577	NM_003647	DGKE
95	chr17	54711915	55079556	367641	chr17	54869273	54911256	41983	NM_001085430	C17orf67
95	chr17	54711915	55079556	367641	chr17	54961462	54962274	812	NR_027025	MTVR2
95	chr17	54711915	55079556	367641	chr17	55015560	55038411	22851	NM_004645	COIL
95	chr17	54711915	55079556	367641	chr17	54968630	54968716	86	NR_037408	MIR3614
96	chr17	55087987	55802521	714534	chr17	55163077	55198705	35628	NM_001242903	AKAP1
96	chr17	55087987	55802521	714534	chr17	55122838	55124156	1318	NR_002818	RNF126P1
96	chr17	55087987	55802521	714534	chr17	55162552	55198710	36158	NM_003488	AKAP1
96	chr17	55087987	55802521	714534	chr17	55334373	55710544	376171	NM_170721	MSI2
96	chr17	55087987	55802521	714534	chr17	55163134	55198705	35571	NM_001242902	AKAP1
96	chr17	55087987	55802521	714534	chr17	55333930	55757299	423369	NM_138962	MSI2
97	chr17	62840133	62947461	107328	chr17	62850487	62914903	64416	NM_199340	LRRC37A3
98	chr17	72174138	72789075	614937	chr17	72581056	72590348	9292	NM_152460	C17orf77
98	chr17	72174138	72789075	614937	chr17	72270385	72311023	40638	NM_001172810	DNAI2
98	chr17	72174138	72789075	614937	chr17	72199794	72206019	6225	NM_001035258	RPL38
98	chr17	72174138	72789075	614937	chr17	72199794	72206019	6225	NM_000999	RPL38
98	chr17	72174138	72789075	614937	chr17	72206134	72209460	3326	NR_026914	MGC16275
98	chr17	72174138	72789075	614937	chr17	72209695	72258157	48462	NM_032646	TTYH2
98	chr17	72174138	72789075	614937	chr17	72244504	72258157	13653	NM_052869	TTYH2
98	chr17	72174138	72789075	614937	chr17	72517312	72527613	10301	NM_174892	CD300LB
98	chr17	72174138	72789075	614937	chr17	72462521	72480937	18416	NM_007261	CD300A
98	chr17	72174138	72789075	614937	chr17	72352554	72357958	5404	NM_001080466	BTBD17
98	chr17	72174138	72789075	614937	chr17	72322350	72351959	29609	NM_153209	KIF19
98	chr17	72174138	72789075	614937	chr17	72270385	72311023	40638	NM_023036	DNAI2
98	chr17	72174138	72789075	614937	chr17	72462521	72480937	18416	NM_001256841	CD300A
98	chr17	72174138	72789075	614937	chr17	72363644	72368739	5095	NM_181790	GPR142
98	chr17	72174138	72789075	614937	chr17	72429835	72443568	13733	NM_018653	GPRC5C
98	chr17	72174138	72789075	614937	chr17	72427666	72443568	15902	NM_022036	GPRC5C
98	chr17	72174138	72789075	614937	chr17	72537204	72542310	5106	NM_006678	CD300C
98	chr17	72174138	72789075	614937	chr17	72576110	72588370	12260	NM_001115152	CD300LD
98	chr17	72174138	72789075	614937	chr17	72733355	72743474	10119	NM_001163990	RAB37
98	chr17	72174138	72789075	614937	chr17	72733355	72743474	10119	NM_001006638	RAB37
98	chr17	72174138	72789075	614937	chr17	72667255	72743474	76219	NM_175738	RAB37
98	chr17	72174138	72789075	614937	chr17	72606021	72619897	13876	NM_181449	CD300E
98	chr17	72174138	72789075	614937	chr17	72732958	72743474	10516	NM_001163989	RAB37
98	chr17	72174138	72789075	614937	chr17	72690451	72709108	18657	NM_139018	CD300LF
98	chr17	72174138	72789075	614937	chr17	72766685	72772470	5785	NM_015654	NAT9
98	chr17	72174138	72789075	614937	chr17	72744750	72765499	20749	NM_004252	SLC9A3R1
98	chr17	72174138	72789075	614937	chr17	72744751	72744838	87	NR_037409	MIR3615
98	chr17	72174138	72789075	614937	chr17	72772621	72835922	63301	NM_017728	TMEM104
99	chr17	77722791	77829132	106341	chr17	77806954	77813213	6259	NM_003655	CBX4
99	chr17	77722791	77829132	106341	chr17	77768175	77770915	2740	NM_020649	CBX8
99	chr17	77722791	77829132	106341	chr17	77751976	77756331	4355	NM_032647	CBX2
99	chr17	77722791	77829132	106341	chr17	77751976	77761449	9473	NM_005189	CBX2
100	chr17	78370328	78630657	260329	chr17	78234659	78372581	137922	NM_001256071	RNF213
100	chr17	78370328	78630657	260329	chr17	78325630	78388968	63338	NR_029376	LOC100294362
100	chr17	78370328	78630657	260329	chr17	78518624	78940173	421549	NM_001163034	RPTOR
100	chr17	78370328	78630657	260329	chr17	78388966	78404171	15205	NM_001164638	ENDOV
100	chr17	78370328	78630657	260329	chr17	78388966	78411884	22918	NM_001164637	ENDOV
100	chr17	78370328	78630657	260329	chr17	78388966	78411884	22918	NM_173627	ENDOV
100	chr17	78370328	78630657	260329	chr17	78440632	78450404	9772	NM_002522	NPTX1
100	chr17	78370328	78630657	260329	chr17	78393217	78393293	76	NR_039883	MIR4730
100	chr17	78370328	78630657	260329	chr17	78518624	78940173	421549	NM_020761	RPTOR
101	chr17	78632841	79703517	1070676	chr17	79506910	79519429	12519	NM_025161	C17orf70
101	chr17	78632841	79703517	1070676	chr17	78965640	78973933	8293	NM_024591	CHMP6
101	chr17	78632841	79703517	1070676	chr17	78518624	78940173	421549	NM_001163034	RPTOR
101	chr17	78632841	79703517	1070676	chr17	78518624	78940173	421549	NM_020761	RPTOR
101	chr17	78632841	79703517	1070676	chr17	79139306	79156964	17658	NR_027255	AATK-AS1
101	chr17	78632841	79703517	1070676	chr17	79008946	79091232	82286	NM_001144888	BAIAP2
101	chr17	78632841	79703517	1070676	chr17	79008946	79084312	75366	NM_017450	BAIAP2
101	chr17	78632841	79703517	1070676	chr17	79002932	79008519	5587	NR_026857	BAIAP2-AS1
101	chr17	78632841	79703517	1070676	chr17	79099682	79099749	67	NR_029897	MIR338
101	chr17	78632841	79703517	1070676	chr17	79091095	79105748	14653	NM_004920	AATK
101	chr17	78632841	79703517	1070676	chr17	79091095	79139872	48777	NM_001080395	AATK
101	chr17	78632841	79703517	1070676	chr17	79008946	79091232	82286	NM_006340	BAIAP2
101	chr17	78632841	79703517	1070676	chr17	79008946	79091232	82286	NM_017451	BAIAP2
101	chr17	78632841	79703517	1070676	chr17	79099075	79099173	98	NR_030394	MIR657
101	chr17	78632841	79703517	1070676	chr17	79099676	79099755	79	NR_036151	MIR3065
101	chr17	78632841	79703517	1070676	chr17	79106995	79107108	113	NR_031652	MIR1250
101	chr17	78632841	79703517	1070676	chr17	79163392	79196751	33359	NM_001009811	AZI1
101	chr17	78632841	79703517	1070676	chr17	79202076	79212891	10815	NM_144679	ENTHD2
101	chr17	78632841	79703517	1070676	chr17	79163392	79196751	33359	NM_014984	AZI1
101	chr17	78632841	79703517	1070676	chr17	79349698	79359160	9462	NM_001272086	LOC100130370
101	chr17	78632841	79703517	1070676	chr17	79213110	79215098	1988	NM_001086521	C17orf89
101	chr17	78632841	79703517	1070676	chr17	79276623	79283048	6425	NR_038080	LINC00482
101	chr17	78632841	79703517	1070676	chr17	79218798	79269096	50298	NM_001037984	SLC38A10
101	chr17	78632841	79703517	1070676	chr17	79224670	79269096	44426	NM_138570	SLC38A10
101	chr17	78632841	79703517	1070676	chr17	79285071	79304474	19403	NM_178520	TMEM105
101	chr17	78632841	79703517	1070676	chr17	79495416	79504156	8740	NM_001077182	FSCN2
101	chr17	78632841	79703517	1070676	chr17	79373539	79433358	59819	NM_001080519	BAHCC1
101	chr17	78632841	79703517	1070676	chr17	79476996	79479892	2896	NM_001614	ACTG1
101	chr17	78632841	79703517	1070676	chr17	79476996	79479892	2896	NR_037688	ACTG1
101	chr17	78632841	79703517	1070676	chr17	79418129	79418214	85	NR_036152	MIR3186
101	chr17	78632841	79703517	1070676	chr17	79374515	79374578	63	NR_039894	MIR4740
101	chr17	78632841	79703517	1070676	chr17	79476996	79479892	2896	NM_001199954	ACTG1
101	chr17	78632841	79703517	1070676	chr17	79495416	79504156	8740	NM_012418	FSCN2
101	chr17	78632841	79703517	1070676	chr17	79617488	79623607	6119	NM_002602	PDE6G
101	chr17	78632841	79703517	1070676	chr17	79617488	79623607	6119	NR_026872	PDE6G
101	chr17	78632841	79703517	1070676	chr17	79523912	79604138	80226	NM_017921	NPLOC4
101	chr17	78632841	79703517	1070676	chr17	79506910	79519429	12519	NR_033338	C17orf70
101	chr17	78632841	79703517	1070676	chr17	79609348	79615779	6431	NM_031945	TSPAN10
101	chr17	78632841	79703517	1070676	chr17	79633760	79640936	7176	NM_199287	CCDC137
101	chr17	78632841	79703517	1070676	chr17	79632065	79633618	1553	NM_001039842	OXLD1
101	chr17	78632841	79703517	1070676	chr17	79679265	79688046	8781	NM_012140	SLC25A10
101	chr17	78632841	79703517	1070676	chr17	79648223	79650954	2731	NM_001040025	ARL16
101	chr17	78632841	79703517	1070676	chr17	79650961	79669151	18190	NM_004712	HGS
101	chr17	78632841	79703517	1070676	chr17	79670399	79674556	4157	NM_002949	MRPL12
101	chr17	78632841	79703517	1070676	chr17	79679265	79688046	8781	NM_001270888	SLC25A10
101	chr17	78632841	79703517	1070676	chr17	79679265	79688046	8781	NM_001270953	SLC25A10
102	chr17	79785999	81048189	1262190	chr17	80186281	80197375	11094	NM_001206950	SLC16A3
102	chr17	79785999	81048189	1262190	chr17	80005777	80009650	3873	NM_002917	RFNG
102	chr17	79785999	81048189	1262190	chr17	79976578	79980785	4207	NM_144998	STRA13
102	chr17	79785999	81048189	1262190	chr17	79910382	79919057	8675	NM_178493	NOTUM
102	chr17	79785999	81048189	1262190	chr17	79876144	79885587	9443	NM_002359	MAFG
102	chr17	79785999	81048189	1262190	chr17	79780292	79791167	10875	NM_001093767	FAM195B
102	chr17	79785999	81048189	1262190	chr17	79780292	79791167	10875	NM_207368	FAM195B
102	chr17	79785999	81048189	1262190	chr17	79825596	79829282	3686	NM_001185078	ARHGDIA
102	chr17	79785999	81048189	1262190	chr17	79825596	79828790	3194	NM_001185077	ARHGDIA
102	chr17	79785999	81048189	1262190	chr17	79801033	79818544	17511	NM_000918	P4HB
102	chr17	79785999	81048189	1262190	chr17	79791367	79792926	1559	NM_001007533	PPP1R27
102	chr17	79785999	81048189	1262190	chr17	79825596	79829282	3686	NM_004309	ARHGDIA
102	chr17	79785999	81048189	1262190	chr17	79845710	79849462	3752	NM_005782	ALYREF
102	chr17	79785999	81048189	1262190	chr17	79849598	79858363	8765	NM_001002246	ANAPC11
102	chr17	79785999	81048189	1262190	chr17	79849598	79858363	8765	NM_001002247	ANAPC11
102	chr17	79785999	81048189	1262190	chr17	79849598	79858363	8765	NM_001002248	ANAPC11
102	chr17	79785999	81048189	1262190	chr17	79860776	79869077	8301	NR_033685	PCYT2
102	chr17	79785999	81048189	1262190	chr17	79849598	79858363	8765	NM_001002244	ANAPC11
102	chr17	79785999	81048189	1262190	chr17	79849598	79858363	8765	NM_016476	ANAPC11
102	chr17	79785999	81048189	1262190	chr17	79849598	79858363	8765	NM_001002245	ANAPC11
102	chr17	79785999	81048189	1262190	chr17	79860071	79860781	710	NM_148896	NPB
102	chr17	79785999	81048189	1262190	chr17	79849817	79858363	8546	NM_001002249	ANAPC11
102	chr17	79785999	81048189	1262190	chr17	79860776	79869340	8564	NM_001184917	PCYT2
102	chr17	79785999	81048189	1262190	chr17	79860776	79869077	8301	NR_033683	PCYT2
102	chr17	79785999	81048189	1262190	chr17	79860776	79869340	8564	NM_001256435	PCYT2
102	chr17	79785999	81048189	1262190	chr17	79860776	79869340	8564	NM_001256434	PCYT2
102	chr17	79785999	81048189	1262190	chr17	79860776	79869340	8564	NM_001256433	PCYT2
102	chr17	79785999	81048189	1262190	chr17	79860776	79869340	8564	NM_002861	PCYT2
102	chr17	79785999	81048189	1262190	chr17	79869814	79876058	6244	NM_016538	SIRT7
102	chr17	79785999	81048189	1262190	chr17	79885704	79888629	2925	NR_015454	MAFG-AS1
102	chr17	79785999	81048189	1262190	chr17	79876144	79881444	5300	NM_032711	MAFG
102	chr17	79785999	81048189	1262190	chr17	79890268	79894968	4700	NM_006907	PYCR1
102	chr17	79785999	81048189	1262190	chr17	79890266	79894968	4702	NM_153824	PYCR1
102	chr17	79785999	81048189	1262190	chr17	79897520	79905109	7589	NM_001145113	MYADML2
102	chr17	79785999	81048189	1262190	chr17	79935425	79975282	39857	NR_045351	ASPSCR1
102	chr17	79785999	81048189	1262190	chr17	79935425	79975282	39857	NM_024083	ASPSCR1
102	chr17	79785999	81048189	1262190	chr17	79935425	79975282	39857	NM_001251888	ASPSCR1
102	chr17	79785999	81048189	1262190	chr17	79976578	79980785	4207	NM_001271007	STRA13
102	chr17	79785999	81048189	1262190	chr17	79976578	79980785	4207	NM_001271006	STRA13
102	chr17	79785999	81048189	1262190	chr17	79989531	79992080	2549	NM_005052	RAC3
102	chr17	79785999	81048189	1262190	chr17	79981279	79989027	7748	NM_144999	LRRC45
102	chr17	79785999	81048189	1262190	chr17	79993756	79995573	1817	NM_016286	DCXR
102	chr17	79785999	81048189	1262190	chr17	79993756	79995573	1817	NM_001195218	DCXR
102	chr17	79785999	81048189	1262190	chr17	80036213	80056106	19893	NM_004104	FASN
102	chr17	79785999	81048189	1262190	chr17	80015747	80023697	7950	NM_022156	DUS1L
102	chr17	79785999	81048189	1262190	chr17	80009762	80015346	5584	NM_212492	GPS1
102	chr17	79785999	81048189	1262190	chr17	80009762	80015346	5584	NM_004127	GPS1
102	chr17	79785999	81048189	1262190	chr17	80186281	80197375	11094	NM_001042422	SLC16A3
102	chr17	79785999	81048189	1262190	chr17	80059345	80170689	111344	NM_198082	CCDC57
102	chr17	79785999	81048189	1262190	chr17	80200536	80231594	31058	NM_139062	CSNK1D
102	chr17	79785999	81048189	1262190	chr17	80190107	80197375	7268	NM_001042423	SLC16A3
102	chr17	79785999	81048189	1262190	chr17	80186886	80197375	10489	NM_004207	SLC16A3
102	chr17	79785999	81048189	1262190	chr17	80192774	80197375	4601	NM_001206951	SLC16A3
102	chr17	79785999	81048189	1262190	chr17	80200536	80231594	31058	NM_001893	CSNK1D
102	chr17	79785999	81048189	1262190	chr17	80193649	80197375	3726	NM_001206952	SLC16A3
102	chr17	79785999	81048189	1262190	chr17	81037566	81052591	15025	NM_001004431	METRNL
102	chr17	79785999	81048189	1262190	chr17	80400462	80408707	8245	NR_036518	C17orf62
102	chr17	79785999	81048189	1262190	chr17	80347085	80376513	29428	NM_175902	OGFOD3
102	chr17	79785999	81048189	1262190	chr17	80332200	80333370	1170	NM_018949	UTS2R
102	chr17	79785999	81048189	1262190	chr17	80317122	80321652	4530	NM_207459	TEX19
102	chr17	79785999	81048189	1262190	chr17	80272745	80275480	2735	NM_006137	CD7
102	chr17	79785999	81048189	1262190	chr17	80278899	80291921	13022	NM_003004	SECTM1
102	chr17	79785999	81048189	1262190	chr17	80347085	80376513	29428	NR_033265	OGFOD3
102	chr17	79785999	81048189	1262190	chr17	80347085	80376513	29428	NM_024648	OGFOD3
102	chr17	79785999	81048189	1262190	chr17	80376251	80400516	24265	NM_173620	HEXDC
102	chr17	79785999	81048189	1262190	chr17	80400462	80408707	8245	NR_036517	C17orf62
102	chr17	79785999	81048189	1262190	chr17	80477593	80562483	84890	NM_004514	FOXK2
102	chr17	79785999	81048189	1262190	chr17	80416059	80446143	30084	NM_001038618	NARF
102	chr17	79785999	81048189	1262190	chr17	80400462	80407602	7140	NM_001193655	C17orf62
102	chr17	79785999	81048189	1262190	chr17	80400462	80408707	8245	NR_036514	C17orf62
102	chr17	79785999	81048189	1262190	chr17	80400462	80408707	8245	NM_001100407	C17orf62
102	chr17	79785999	81048189	1262190	chr17	80400462	80408707	8245	NM_001100408	C17orf62
102	chr17	79785999	81048189	1262190	chr17	80407590	80408707	1117	NR_036519	C17orf62
102	chr17	79785999	81048189	1262190	chr17	80400462	80408707	8245	NR_036516	C17orf62
102	chr17	79785999	81048189	1262190	chr17	80400462	80408707	8245	NM_001033046	C17orf62
102	chr17	79785999	81048189	1262190	chr17	80400462	80408707	8245	NM_001193654	C17orf62
102	chr17	79785999	81048189	1262190	chr17	80400462	80408707	8245	NM_001193653	C17orf62
102	chr17	79785999	81048189	1262190	chr17	80400462	80408707	8245	NM_001193657	C17orf62
102	chr17	79785999	81048189	1262190	chr17	80416539	80446143	29604	NM_001083608	NARF
102	chr17	79785999	81048189	1262190	chr17	80416539	80446143	29604	NM_012336	NARF
102	chr17	79785999	81048189	1262190	chr17	80416539	80446143	29604	NM_031968	NARF
102	chr17	79785999	81048189	1262190	chr17	80674581	80685893	11312	NR_046408	FN3KRP
102	chr17	79785999	81048189	1262190	chr17	80572437	80606411	33974	NM_019613	WDR45B
102	chr17	79785999	81048189	1262190	chr17	80614942	80656598	41656	NM_006822	RAB40B
102	chr17	79785999	81048189	1262190	chr17	80709939	80901062	191123	NM_005993	TBCD
102	chr17	79785999	81048189	1262190	chr17	80674581	80685893	11312	NM_024619	FN3KRP
102	chr17	79785999	81048189	1262190	chr17	80693451	80709073	15622	NM_022158	FN3K
102	chr17	79785999	81048189	1262190	chr17	80901666	81009686	108020	NM_001009905	B3GNTL1
102	chr17	79785999	81048189	1262190	chr17	80787309	80797931	10622	NM_024702	ZNF750
103	chr16	688609	853965	165356	chr16	771141	772590	1449	NM_023933	FAM173A
103	chr16	688609	853965	165356	chr16	765172	767480	2308	NM_024042	METRN
103	chr16	688609	853965	165356	chr16	730114	732768	2654	NM_005861	STUB1
103	chr16	688609	853965	165356	chr16	726074	728267	2193	NM_003961	RHBDL1
103	chr16	688609	853965	165356	chr16	718082	724174	6092	NM_138769	RHOT2
103	chr16	688609	853965	165356	chr16	699362	717829	18467	NM_145294	WDR90
103	chr16	688609	853965	165356	chr16	691848	698474	6626	NM_138418	FAM195A
103	chr16	688609	853965	165356	chr16	742499	755825	13326	NM_153350	FBXL16
103	chr16	688609	853965	165356	chr16	734701	740400	5699	NM_032259	WDR24
103	chr16	688609	853965	165356	chr16	731666	734439	2773	NM_001005920	JMJD8
103	chr16	688609	853965	165356	chr16	771141	772590	1449	NM_001271285	FAM173A
103	chr16	688609	853965	165356	chr16	838621	848074	9453	NM_022092	CHTF18
103	chr16	688609	853965	165356	chr16	772581	776473	3892	NM_001031737	CCDC78
103	chr16	688609	853965	165356	chr16	811072	818865	7793	NM_013404	MSLN
103	chr16	688609	853965	165356	chr16	779768	790997	11229	NM_022493	NARFL
103	chr16	688609	853965	165356	chr16	777265	779715	2450	NM_032304	HAGHL
103	chr16	688609	853965	165356	chr16	810765	818865	8100	NM_001177355	MSLN
103	chr16	688609	853965	165356	chr16	810764	818865	8101	NM_005823	MSLN
103	chr16	688609	853965	165356	chr16	820182	820277	95	NR_030384	MIR662
103	chr16	688609	853965	165356	chr16	834973	838383	3410	NM_058192	RPUSD1
103	chr16	688609	853965	165356	chr16	848040	850733	2693	NM_016541	GNG13
104	chr16	3875339	4320693	445354	chr16	3775055	3930121	155066	NM_004380	CREBBP
104	chr16	3875339	4320693	445354	chr16	4307186	4323001	15815	NM_003223	TFAP4
104	chr16	3875339	4320693	445354	chr16	3775055	3930121	155066	NM_001079846	CREBBP
104	chr16	3875339	4320693	445354	chr16	4012649	4166186	153537	NM_001116	ADCY9
104	chr16	3875339	4320693	445354	chr16	4239374	4292081	52707	NM_001098814	SRL
104	chr16	3875339	4320693	445354	chr16	4295825	4303790	7965	NR_039999	LOC100507501
105	chr16	4390814	4526245	135431	chr16	4524718	4560348	35630	NM_001127206	HMOX2
105	chr16	4390814	4526245	135431	chr16	4421848	4433529	11681	NM_138440	VASN
105	chr16	4390814	4526245	135431	chr16	4404542	4466962	62420	NM_024535	CORO7
105	chr16	4390814	4526245	135431	chr16	4404542	4466962	62420	NM_001201473	CORO7
105	chr16	4390814	4526245	135431	chr16	4404542	4466962	62420	NM_001201472	CORO7
105	chr16	4390814	4526245	135431	chr16	4390251	4466962	76711	NM_001201479	CORO7-PAM16
105	chr16	4390814	4526245	135431	chr16	4390251	4401373	11122	NM_016069	PAM16
105	chr16	4390814	4526245	135431	chr16	4475805	4506775	30970	NM_001135110	DNAJA3
105	chr16	4390814	4526245	135431	chr16	4475805	4506775	30970	NM_005147	DNAJA3
105	chr16	4390814	4526245	135431	chr16	4511694	4524896	13202	NM_020677	NMRAL1
106	chr16	4908501	5177521	269020	chr16	5083702	5092972	9270	NR_038913	NAGPA-AS1
106	chr16	4908501	5177521	269020	chr16	5074844	5083942	9098	NM_016256	NAGPA
106	chr16	4908501	5177521	269020	chr16	5008317	5069156	60839	NM_014692	SEC14L5
106	chr16	4908501	5177521	269020	chr16	4932507	4987136	54629	NM_002705	PPL
106	chr16	4908501	5177521	269020	chr16	4902076	4932363	30287	NM_016936	UBN1
106	chr16	4908501	5177521	269020	chr16	4897911	4932363	34452	NM_001079514	UBN1
106	chr16	4908501	5177521	269020	chr16	5134300	5147789	13489	NM_201598	FAM86A
106	chr16	4908501	5177521	269020	chr16	5094122	5116146	22024	NM_001098514	C16orf89
106	chr16	4908501	5177521	269020	chr16	5094122	5116146	22024	NM_152459	C16orf89
106	chr16	4908501	5177521	269020	chr16	5121809	5137380	15571	NM_019109	ALG1
106	chr16	4908501	5177521	269020	chr16	5134300	5147789	13489	NM_201400	FAM86A
107	chr16	14845196	15125573	280377	chr16	14844669	14859305	14636	NM_001277324	LOC642799
107	chr16	14845196	15125573	280377	chr16	14844669	14859315	14646	NM_001277323	LOC642778
107	chr16	14845196	15125573	280377	chr16	15005076	15005170	94	NR_036144	MIR3180-3
107	chr16	14845196	15125573	280377	chr16	14916288	14918559	2271	NR_023387	ABCC6P2
107	chr16	14845196	15125573	280377	chr16	14995364	14995448	84	NR_036143	MIR3179-2
107	chr16	14845196	15125573	280377	chr16	14995364	14995448	84	NR_036140	MIR3179-1
107	chr16	14845196	15125573	280377	chr16	14927642	14990014	62372	NM_014287	NOMO1
107	chr16	14845196	15125573	280377	chr16	14995364	14995448	84	NR_036145	MIR3179-3
107	chr16	14845196	15125573	280377	chr16	15031299	15045931	14632	NM_006985	NPIP
107	chr16	14845196	15125573	280377	chr16	15005076	15005170	94	NR_036141	MIR3180-1
107	chr16	14845196	15125573	280377	chr16	15005080	15005168	88	NR_036142	MIR3180-2
107	chr16	14845196	15125573	280377	chr16	15068832	15131552	62720	NM_015027	PDXDC1
108	chr16	16284259	16846294	562035	chr16	16394015	16394099	84	NR_036140	MIR3179-1
108	chr16	16284259	16846294	562035	chr16	16315043	16317328	2285	NM_001079528	ABCC6
108	chr16	16284259	16846294	562035	chr16	16243421	16317328	73907	NM_001171	ABCC6
108	chr16	16284259	16846294	562035	chr16	16394015	16394099	84	NR_036145	MIR3179-3
108	chr16	16284259	16846294	562035	chr16	16326388	16388668	62280	NM_001004067	NOMO3
108	chr16	16284259	16846294	562035	chr16	16403735	16403823	88	NR_036142	MIR3180-2
108	chr16	16284259	16846294	562035	chr16	16403731	16403825	94	NR_036144	MIR3180-3
108	chr16	16284259	16846294	562035	chr16	16394015	16394099	84	NR_036143	MIR3179-2
108	chr16	16284259	16846294	562035	chr16	16403731	16403825	94	NR_036141	MIR3180-1
108	chr16	16284259	16846294	562035	chr16	16411465	16444465	33000	NR_036447	PKD1P1
109	chr16	21408218	21949126	540908	chr16	21610855	21668792	57937	NM_016025	METTL9
109	chr16	21408218	21949126	540908	chr16	21458003	21513602	55599	NR_027155	LOC100271836
109	chr16	21408218	21949126	540908	chr16	21443344	21445776	2432	NR_024456	LOC100190986
109	chr16	21408218	21949126	540908	chr16	21413454	21436658	23204	NM_130464	NPIPL3
109	chr16	21408218	21949126	540908	chr16	21529229	21531765	2536	NR_002594	SLC7A5P2
109	chr16	21408218	21949126	540908	chr16	21716283	21772050	55767	NM_170664	OTOA
109	chr16	21408218	21949126	540908	chr16	21610855	21668792	57937	NM_001077180	METTL9
109	chr16	21408218	21949126	540908	chr16	21689834	21772050	82216	NM_144672	OTOA
109	chr16	21408218	21949126	540908	chr16	21652604	21663987	11383	NM_005849	IGSF6
109	chr16	21408218	21949126	540908	chr16	21695749	21772050	76301	NM_001161683	OTOA
109	chr16	21408218	21949126	540908	chr16	21807950	21830495	22545	NR_003370	RRN3P1
110	chr16	22444247	22727258	283011	chr16	22557018	22588186	31168	NR_003676	LOC653786
110	chr16	22444247	22727258	283011	chr16	22524843	22547841	22998	NM_001135865	LOC100132247
110	chr16	22444247	22727258	283011	chr16	22448328	22503541	55213	NR_027154	SMG1P1
110	chr16	22444247	22727258	283011	chr16	22430866	22449036	18170	NR_027460	RRN3P3
111	chr16	29383024	29653124	270100	chr16	29476288	29478899	2611	NR_002556	LOC388242
111	chr16	29383024	29653124	270100	chr16	29465821	29469545	3724	NM_001015000	SLX1A
111	chr16	29383024	29653124	270100	chr16	29460665	29461236	571	NR_002454	LOC606724
111	chr16	29383024	29653124	270100	chr16	29464913	29466285	1372	NM_001039182	BOLA2B
111	chr16	29383024	29653124	270100	chr16	29464913	29466285	1372	NM_001031827	BOLA2
111	chr16	29383024	29653124	270100	chr16	29465821	29469545	3724	NM_001014999	SLX1A
111	chr16	29383024	29653124	270100	chr16	29465821	29469545	3724	NM_024044	SLX1B
111	chr16	29383024	29653124	270100	chr16	29465821	29469545	3724	NM_178044	SLX1B
111	chr16	29383024	29653124	270100	chr16	29476288	29478899	2611	NR_002557	LOC613038
111	chr16	29383024	29653124	270100	chr16	29466411	29476301	9890	NR_037609	SLX1B-SULT1A4
111	chr16	29383024	29653124	270100	chr16	29466411	29476301	9890	NR_037608	SLX1A-SULT1A3
111	chr16	29383024	29653124	270100	chr16	29471206	29476301	5095	NM_177552	SULT1A3
111	chr16	29383024	29653124	270100	chr16	29471206	29476301	5095	NM_001017390	SULT1A4
111	chr16	29383024	29653124	270100	chr16	29538928	29577540	38612	NR_002473	LOC440354
111	chr16	29383024	29653124	270100	chr16	29624423	29625038	615	NR_002593	SLC7A5P1
112	chr16	30199661	30346806	147145	chr16	30200004	30200575	571	NR_002454	LOC606724
112	chr16	30199661	30346806	147145	chr16	30194730	30200397	5667	NM_001193333	CORO1A
112	chr16	30199661	30346806	147145	chr16	30194730	30200397	5667	NM_007074	CORO1A
112	chr16	30199661	30346806	147145	chr16	30205753	30215650	9897	NR_037608	SLX1A-SULT1A3
112	chr16	30199661	30346806	147145	chr16	30205163	30208887	3724	NM_001015000	SLX1A
112	chr16	30199661	30346806	147145	chr16	30205163	30208887	3724	NM_024044	SLX1B
112	chr16	30199661	30346806	147145	chr16	30205163	30208887	3724	NM_001014999	SLX1A
112	chr16	30199661	30346806	147145	chr16	30205163	30208887	3724	NM_178044	SLX1B
112	chr16	30199661	30346806	147145	chr16	30204255	30205627	1372	NM_001031827	BOLA2
112	chr16	30199661	30346806	147145	chr16	30204255	30205627	1372	NM_001039182	BOLA2B
112	chr16	30199661	30346806	147145	chr16	30205753	30215650	9897	NR_037609	SLX1B-SULT1A4
112	chr16	30199661	30346806	147145	chr16	30210548	30215650	5102	NM_001017390	SULT1A4
112	chr16	30199661	30346806	147145	chr16	30210548	30215650	5102	NM_177552	SULT1A3
112	chr16	30199661	30346806	147145	chr16	30215637	30218248	2611	NR_002556	LOC388242
112	chr16	30199661	30346806	147145	chr16	30215637	30218248	2611	NR_002557	LOC613038
112	chr16	30199661	30346806	147145	chr16	30234349	30256932	22583	NR_002555	LOC613037
112	chr16	30199661	30346806	147145	chr16	30278913	30346695	67782	NR_002453	LOC595101
112	chr16	30199661	30346806	147145	chr16	30278913	30317244	38331	NR_002473	LOC440354
113	chr16	31958370	33853143	1894773	chr16	32684848	32687448	2600	NM_001267813	TP53TG3
113	chr16	31958370	33853143	1894773	chr16	32684848	32687448	2600	NM_001099687	TP53TG3B
113	chr16	31958370	33853143	1894773	chr16	32162608	32163874	1266	NR_002827	HERC2P4
113	chr16	31958370	33853143	1894773	chr16	32300867	32301302	435	NR_033866	LOC390705
113	chr16	31958370	33853143	1894773	chr16	32264649	32267243	2594	NM_001243722	TP53TG3D
113	chr16	31958370	33853143	1894773	chr16	32888796	32896463	7667	NR_003083	SLC6A10P
113	chr16	31958370	33853143	1894773	chr16	32685473	32687448	1975	NM_001205260	TP53TG3C
113	chr16	31958370	33853143	1894773	chr16	32685473	32687448	1975	NM_001205259	TP53TG3C
113	chr16	31958370	33853143	1894773	chr16	32684848	32687448	2600	NM_016212	TP53TG3
113	chr16	31958370	33853143	1894773	chr16	32684848	32687448	2600	NM_001205265	TP53TG3B
113	chr16	31958370	33853143	1894773	chr16	33262119	33264719	2600	NM_016212	TP53TG3
113	chr16	31958370	33853143	1894773	chr16	33205584	33207559	1975	NM_001205259	TP53TG3C
113	chr16	31958370	33853143	1894773	chr16	33205584	33208179	2595	NM_001267813	TP53TG3
113	chr16	31958370	33853143	1894773	chr16	33205584	33208179	2595	NM_001099687	TP53TG3B
113	chr16	31958370	33853143	1894773	chr16	33205584	33208179	2595	NM_016212	TP53TG3
113	chr16	31958370	33853143	1894773	chr16	33205584	33208179	2595	NM_001205265	TP53TG3B
113	chr16	31958370	33853143	1894773	chr16	33205584	33207559	1975	NM_001205260	TP53TG3C
113	chr16	31958370	33853143	1894773	chr16	33262119	33264719	2600	NM_001205265	TP53TG3B
113	chr16	31958370	33853143	1894773	chr16	33262119	33264094	1975	NM_001205259	TP53TG3C
113	chr16	31958370	33853143	1894773	chr16	33262119	33264719	2600	NM_001267813	TP53TG3
113	chr16	31958370	33853143	1894773	chr16	33262119	33264719	2600	NM_001099687	TP53TG3B
113	chr16	31958370	33853143	1894773	chr16	33262119	33264094	1975	NM_001205260	TP53TG3C
113	chr16	31958370	33853143	1894773	chr16	33298267	33298702	435	NR_033866	LOC390705
113	chr16	31958370	33853143	1894773	chr16	33463506	33563243	99737	NR_046943	RNU6-76P
114	chr16	33935362	34760618	825256	chr16	34739458	34740840	1382	NR_034018	LOC100130700
114	chr16	33935362	34760618	825256	chr16	34711784	34714967	3183	NR_026980	LOC146481
114	chr16	33935362	34760618	825256	chr16	34597786	34626084	28298	NR_027080	LOC283914
114	chr16	33935362	34760618	825256	chr16	34403801	34404762	961	NR_002837	UBE2MP1
114	chr16	33935362	34760618	825256	chr16	33961051	33962503	1452	NR_038368	LINC00273
114	chr16	33935362	34760618	825256	chr16	34597901	34624955	27054	NR_027079	LOC283914
114	chr16	33935362	34760618	825256	chr16	34739458	34740840	1382	NR_034019	LOC100130700
115	chr16	34876187	35025643	149456	chr16	34980922	34990995	10073	NR_033985	FLJ26245
115	chr16	34876187	35025643	149456	chr16	34980893	34981007	114	NR_049740	RNA5SP411
116	chr16	56890879	57017189	126310	chr16	56892429	56892513	84	NR_029680	MIR138-2
116	chr16	56890879	57017189	126310	chr16	56899118	56949762	50644	NM_001126107	SLC12A3
116	chr16	56890879	57017189	126310	chr16	56899118	56949762	50644	NM_000339	SLC12A3
116	chr16	56890879	57017189	126310	chr16	56899118	56949762	50644	NM_001126108	SLC12A3
116	chr16	56890879	57017189	126310	chr16	56995834	57017756	21922	NM_000078	CETP
116	chr16	56890879	57017189	126310	chr16	56966001	56977793	11792	NM_001010989	HERPUD1
116	chr16	56890879	57017189	126310	chr16	56966001	56977793	11792	NM_001272103	HERPUD1
116	chr16	56890879	57017189	126310	chr16	56966001	56977793	11792	NM_014685	HERPUD1
117	chr16	57050734	57181195	130461	chr16	57126454	57181878	55424	NM_152727	CPNE2
117	chr16	57050734	57181195	130461	chr16	57050985	57117436	66451	NM_032206	NLRC5
118	chr16	59663547	60005900	342353	chr16	59788044	59789095	1051	NR_028471	LOC644649
119	chr16	66928257	67043517	115260	chr16	66968346	66978994	10648	NM_003869	CES2
119	chr16	66928257	67043517	115260	chr16	66942024	66952887	10863	NM_001204746	CDH16
119	chr16	66928257	67043517	115260	chr16	66942024	66952887	10863	NM_001204745	CDH16
119	chr16	66928257	67043517	115260	chr16	66942024	66952887	10863	NM_001204744	CDH16
119	chr16	66928257	67043517	115260	chr16	66965957	66968326	2369	NR_024525	FAM96B
119	chr16	66928257	67043517	115260	chr16	66955581	66959439	3858	NM_004165	RRAD
119	chr16	66928257	67043517	115260	chr16	66942024	66952887	10863	NM_004062	CDH16
119	chr16	66928257	67043517	115260	chr16	66955581	66959439	3858	NM_001128850	RRAD
119	chr16	66928257	67043517	115260	chr16	66965957	66968326	2369	NM_016062	FAM96B
119	chr16	66928257	67043517	115260	chr16	66965957	66968326	2369	NR_046109	FAM96B
119	chr16	66928257	67043517	115260	chr16	66995131	67009052	13921	NM_024922	CES3
119	chr16	66928257	67043517	115260	chr16	66968373	66978994	10621	NR_036684	CES2
119	chr16	66928257	67043517	115260	chr16	66968346	66978994	10648	NM_198061	CES2
119	chr16	66928257	67043517	115260	chr16	66995131	67009052	13921	NM_001185177	CES3
119	chr16	66928257	67043517	115260	chr16	67001377	67009052	7675	NM_001185176	CES3
119	chr16	66928257	67043517	115260	chr16	67022491	67043659	21168	NM_173815	CES4A
119	chr16	66928257	67043517	115260	chr16	67034415	67043659	9244	NM_001190202	CES4A
119	chr16	66928257	67043517	115260	chr16	67034415	67043659	9244	NM_001190201	CES4A
120	chr16	67182258	67323199	140941	chr16	67207755	67209640	1885	NM_003946	NOL3
120	chr16	67182258	67323199	140941	chr16	67197287	67203848	6561	NM_001538	HSF4
120	chr16	67182258	67323199	140941	chr16	67182004	67184902	2898	NM_033309	B3GNT9
120	chr16	67182258	67323199	140941	chr16	67143914	67182442	38528	NM_025187	C16orf70
120	chr16	67182258	67323199	140941	chr16	67188088	67193812	5724	NM_003789	TRADD
120	chr16	67182258	67323199	140941	chr16	67193890	67198077	4187	NM_018378	FBXL8
120	chr16	67182258	67323199	140941	chr16	67197287	67203848	6561	NM_001040667	HSF4
120	chr16	67182258	67323199	140941	chr16	67207755	67209640	1885	NM_001276311	NOL3
120	chr16	67182258	67323199	140941	chr16	67207755	67209640	1885	NM_001185057	NOL3
120	chr16	67182258	67323199	140941	chr16	67204399	67209640	5241	NM_001276307	NOL3
120	chr16	67182258	67323199	140941	chr16	67204399	67209640	5241	NM_001276319	NOL3
120	chr16	67182258	67323199	140941	chr16	67204399	67209640	5241	NM_001276312	NOL3
120	chr16	67182258	67323199	140941	chr16	67204399	67209640	5241	NM_001276309	NOL3
120	chr16	67182258	67323199	140941	chr16	67241041	67260901	19860	NM_001004055	LRRC29
120	chr16	67182258	67323199	140941	chr16	67209504	67217883	8379	NM_001040715	KIAA0895L
120	chr16	67182258	67323199	140941	chr16	67218281	67224107	5826	NM_178516	EXOC3L1
120	chr16	67182258	67323199	140941	chr16	67236223	67236298	75	NR_029887	MIR328
120	chr16	67182258	67323199	140941	chr16	67233027	67237927	4900	NM_024712	ELMO3
120	chr16	67182258	67323199	140941	chr16	67226067	67232821	6754	NM_001950	E2F4
120	chr16	67182258	67323199	140941	chr16	67241041	67260721	19680	NM_012163	LRRC29
120	chr16	67182258	67323199	140941	chr16	67312075	67323403	11328	NM_001129727	PLEKHG4
120	chr16	67182258	67323199	140941	chr16	67263291	67281425	18134	NM_013241	FHOD1
120	chr16	67182258	67323199	140941	chr16	67261015	67263182	2167	NM_014187	TMEM208
120	chr16	67182258	67323199	140941	chr16	67311412	67323403	11991	NM_015432	PLEKHG4
120	chr16	67182258	67323199	140941	chr16	67282854	67306094	23240	NM_004594	SLC9A5
120	chr16	67182258	67323199	140941	chr16	67313491	67323403	9912	NM_001129731	PLEKHG4
120	chr16	67182258	67323199	140941	chr16	67313488	67323403	9915	NM_001129729	PLEKHG4
120	chr16	67182258	67323199	140941	chr16	67313049	67323403	10354	NM_001129728	PLEKHG4
121	chr16	69976588	70321361	344773	chr16	70284133	70285833	1700	NM_058219	EXOSC6
121	chr16	69976588	70321361	344773	chr16	69984607	69998250	13643	NM_001136214	CLEC18A
121	chr16	69976588	70321361	344773	chr16	70064248	70064325	77	NR_036054	MIR1972-1
121	chr16	69976588	70321361	344773	chr16	69984804	69998250	13446	NM_182619	CLEC18A
121	chr16	69976588	70321361	344773	chr16	69984888	69998250	13362	NM_001271197	CLEC18A
121	chr16	69976588	70321361	344773	chr16	70010201	70099851	89650	NR_003610	PDXDC2P
121	chr16	69976588	70321361	344773	chr16	70064248	70064325	77	NR_036265	MIR1972-2
121	chr16	69976588	70321361	344773	chr16	70147528	70195184	47656	NM_017990	PDPR
121	chr16	69976588	70321361	344773	chr16	70253483	70259936	6453	NR_033959	LOC100506060
121	chr16	69976588	70321361	344773	chr16	70207927	70220798	12871	NM_173619	CLEC18C
121	chr16	69976588	70321361	344773	chr16	70286296	70323412	37116	NM_001605	AARS
122	chr16	70847248	71202529	355281	chr16	71061012	71264625	203613	NM_017558	HYDIN
122	chr16	70847248	71202529	355281	chr16	70841286	71264625	423339	NM_001270974	HYDIN
122	chr16	70847248	71202529	355281	chr16	71065313	71264625	199312	NM_001198543	HYDIN
122	chr16	70847248	71202529	355281	chr16	71065313	71264625	199312	NM_001198542	HYDIN
123	chr16	74337046	74464673	127627	chr16	74442528	74455368	12840	NM_001011880	CLEC18B
123	chr16	74337046	74464673	127627	chr16	74366303	74402153	35850	NR_026950	LOC283922
123	chr16	74337046	74464673	127627	chr16	74330672	74340186	9514	NM_002811	PSMD7
124	chr16	86516774	86621135	104361	chr16	86544132	86548070	3938	NM_001451	FOXF1
124	chr16	86516774	86621135	104361	chr16	86508130	86542466	34336	NR_033925	FENDRR
124	chr16	86516774	86621135	104361	chr16	86521270	86542466	21196	NR_036444	FENDRR
124	chr16	86516774	86621135	104361	chr16	86563781	86588841	25060	NM_022764	MTHFSD
124	chr16	86516774	86621135	104361	chr16	86563781	86588809	25028	NM_001159380	MTHFSD
124	chr16	86516774	86621135	104361	chr16	86563781	86588841	25060	NM_001159378	MTHFSD
124	chr16	86516774	86621135	104361	chr16	86563781	86588841	25060	NM_001159377	MTHFSD
124	chr16	86516774	86621135	104361	chr16	86563781	86588841	25060	NR_027490	MTHFSD
124	chr16	86516774	86621135	104361	chr16	86563781	86588841	25060	NM_001159379	MTHFSD
124	chr16	86516774	86621135	104361	chr16	86563781	86588841	25060	NR_027489	MTHFSD
124	chr16	86516774	86621135	104361	chr16	86588925	86590905	1980	NR_026674	FLJ30679
124	chr16	86516774	86621135	104361	chr16	86600856	86602537	1681	NM_005251	FOXC2
124	chr16	86516774	86621135	104361	chr16	86612114	86615304	3190	NM_005250	FOXL1
125	chr16	89651319	89761250	109931	chr16	89753075	89762772	9697	NM_052987	CDK10
125	chr16	89651319	89761250	109931	chr16	89724211	89736866	12655	NM_001271910	C16orf55
125	chr16	89651319	89761250	109931	chr16	89679715	89704839	25124	NM_001128141	DPEP1
125	chr16	89651319	89761250	109931	chr16	89642175	89663654	21479	NM_014427	CPNE7
125	chr16	89651319	89761250	109931	chr16	89642175	89663654	21479	NM_153636	CPNE7
125	chr16	89651319	89761250	109931	chr16	89724151	89736866	12715	NM_153025	C16orf55
125	chr16	89651319	89761250	109931	chr16	89686999	89704839	17840	NM_004413	DPEP1
125	chr16	89651319	89761250	109931	chr16	89710838	89724193	13355	NR_046418	CHMP1A
125	chr16	89651319	89761250	109931	chr16	89710838	89724193	13355	NM_002768	CHMP1A
125	chr16	89651319	89761250	109931	chr16	89710838	89724193	13355	NM_001083314	CHMP1A
125	chr16	89651319	89761250	109931	chr16	89724211	89736866	12655	NM_001271907	C16orf55
125	chr16	89651319	89761250	109931	chr16	89724211	89736866	12655	NM_001271908	C16orf55
125	chr16	89651319	89761250	109931	chr16	89724211	89736866	12655	NR_073515	C16orf55
125	chr16	89651319	89761250	109931	chr16	89753075	89762772	9697	NM_001160367	CDK10
125	chr16	89651319	89761250	109931	chr16	89724454	89736866	12412	NM_001271909	C16orf55
125	chr16	89651319	89761250	109931	chr16	89724454	89727916	3462	NR_073516	C16orf55
125	chr16	89651319	89761250	109931	chr16	89753075	89762772	9697	NM_001098533	CDK10
125	chr16	89651319	89761250	109931	chr16	89753075	89762772	9697	NR_027702	CDK10
125	chr16	89651319	89761250	109931	chr16	89753075	89762772	9697	NR_027703	CDK10
125	chr16	89651319	89761250	109931	chr16	89753075	89762772	9697	NM_052988	CDK10
126	chr15	20000042	22822513	2822471	chr15	22133180	22145802	12622	NR_028506	NF1P2
126	chr15	20000042	22822513	2822471	chr15	20487996	20496811	8815	NR_038836	CHEK2P2
126	chr15	20000042	22822513	2822471	chr15	22051852	22083137	31285	NM_207355	POTEB
126	chr15	20000042	22822513	2822471	chr15	20767673	20781026	13353	NR_027411	GOLGA8CP
126	chr15	20000042	22822513	2822471	chr15	20737093	20747114	10021	NM_001145004	GOLGA6L6
126	chr15	20000042	22822513	2822471	chr15	20613649	20711433	97784	NR_036432	HERC2P3
126	chr15	20000042	22822513	2822471	chr15	21122020	21134625	12605	NR_028506	NF1P2
126	chr15	20000042	22822513	2822471	chr15	20874796	20961480	86684	NR_027992	NBEAP1
126	chr15	20000042	22822513	2822471	chr15	21040700	21071643	30943	NM_001277304	POTEB
126	chr15	20000042	22822513	2822471	chr15	21040700	21071643	30943	NR_102391	POTEB
126	chr15	20000042	22822513	2822471	chr15	21040700	21071643	30943	NR_102390	LOC100287399
126	chr15	20000042	22822513	2822471	chr15	21040700	21071977	31277	NM_207355	POTEB
126	chr15	20000042	22822513	2822471	chr15	21040700	21071643	30943	NM_001277303	LOC100287399
126	chr15	20000042	22822513	2822471	chr15	21145766	21198633	52867	NR_040094	CT60
126	chr15	20000042	22822513	2822471	chr15	21932513	21940739	8226	NR_027053	LOC646214
126	chr15	20000042	22822513	2822471	chr15	22051852	22082803	30951	NR_102391	POTEB
126	chr15	20000042	22822513	2822471	chr15	22014419	22016878	2459	NR_024387	CXADRP2
126	chr15	20000042	22822513	2822471	chr15	22051852	22082803	30951	NR_102390	LOC100287399
126	chr15	20000042	22822513	2822471	chr15	22051852	22082803	30951	NM_001277303	LOC100287399
126	chr15	20000042	22822513	2822471	chr15	22051852	22082803	30951	NM_001277304	POTEB
126	chr15	20000042	22822513	2822471	chr15	22675147	22675241	94	NR_039734	MIR4509-3
126	chr15	20000042	22822513	2822471	chr15	22278031	22371088	93057	NR_015416	LOC727924
126	chr15	20000042	22822513	2822471	chr15	22368477	22369561	1084	NM_001004719	OR4M2
126	chr15	20000042	22822513	2822471	chr15	22382472	22383815	1343	NM_001005241	OR4N4
126	chr15	20000042	22822513	2822471	chr15	22413461	22414395	934	NR_028067	OR4N3P
126	chr15	20000042	22822513	2822471	chr15	22546564	22570831	24267	NR_033735	REREP3
126	chr15	20000042	22822513	2822471	chr15	22675147	22675241	94	NR_039733	MIR4509-2
126	chr15	20000042	22822513	2822471	chr15	22675147	22675241	94	NR_039732	MIR4509-1
126	chr15	20000042	22822513	2822471	chr15	22736245	22746002	9757	NM_001001413	GOLGA6L1
126	chr15	20000042	22822513	2822471	chr15	22702284	22715728	13444	NR_027407	GOLGA8DP
127	chr15	23302285	23603834	301549	chr15	23282264	23378259	95995	NR_002824	HERC2P2
127	chr15	23302285	23603834	301549	chr15	23390721	23393943	3222	NR_036470	HERC2P7
127	chr15	23302285	23603834	301549	chr15	23435069	23448423	13354	NR_033350	GOLGA8EP
127	chr15	23302285	23603834	301549	chr15	23569671	23579379	9708	NM_001271664	LOC440243
127	chr15	23302285	23603834	301549	chr15	23599894	23613471	13577	NR_038843	GOLGA8S
128	chr15	24332690	24795438	462748	chr15	24409925	24415053	5128	NR_026647	PWRN2
129	chr15	25415854	25885555	469701	chr15	25440067	25440148	81	NR_003306	SNORD115-14
129	chr15	25415854	25885555	469701	chr15	25436562	25436644	82	NR_003302	SNORD115-10
129	chr15	25415854	25885555	469701	chr15	25436562	25436644	82	NR_003301	SNORD115-9
129	chr15	25415854	25885555	469701	chr15	25434560	25434642	82	NR_003344	SNORD115-29
129	chr15	25415854	25885555	469701	chr15	25423887	25423966	79	NR_003301	SNORD115-9
129	chr15	25415854	25885555	469701	chr15	25415869	25415951	82	NR_001291	SNORD115-1
129	chr15	25415854	25885555	469701	chr15	25421978	25422060	82	NR_003296	SNORD115-4
129	chr15	25415854	25885555	469701	chr15	25420073	25420155	82	NR_003295	SNORD115-3
129	chr15	25415854	25885555	469701	chr15	25417781	25417863	82	NR_003294	SNORD115-2
129	chr15	25415854	25885555	469701	chr15	25423884	25423966	82	NR_003297	SNORD115-5
129	chr15	25415854	25885555	469701	chr15	25423887	25423966	79	NR_003304	SNORD115-12
129	chr15	25415854	25885555	469701	chr15	25423887	25423966	79	NR_003302	SNORD115-10
129	chr15	25415854	25885555	469701	chr15	25425643	25425725	82	NR_003298	SNORD115-6
129	chr15	25415854	25885555	469701	chr15	25432682	25432763	81	NR_003302	SNORD115-10
129	chr15	25415854	25885555	469701	chr15	25430780	25430859	79	NR_003297	SNORD115-5
129	chr15	25415854	25885555	469701	chr15	25430777	25430859	82	NR_003302	SNORD115-10
129	chr15	25415854	25885555	469701	chr15	25427531	25427613	82	NR_003299	SNORD115-7
129	chr15	25415854	25885555	469701	chr15	25429452	25429534	82	NR_003300	SNORD115-8
129	chr15	25415854	25885555	469701	chr15	25430777	25430859	82	NR_003301	SNORD115-9
129	chr15	25415854	25885555	469701	chr15	25430777	25430859	82	NR_003304	SNORD115-12
129	chr15	25415854	25885555	469701	chr15	25434560	25434642	82	NR_003303	SNORD115-11
129	chr15	25415854	25885555	469701	chr15	25434560	25434642	82	NR_003351	SNORD115-36
129	chr15	25415854	25885555	469701	chr15	25434560	25434642	82	NR_003358	SNORD115-43
129	chr15	25415854	25885555	469701	chr15	25436562	25436644	82	NR_003304	SNORD115-12
129	chr15	25415854	25885555	469701	chr15	25436565	25436644	79	NR_003297	SNORD115-5
129	chr15	25415854	25885555	469701	chr15	25438467	25438549	82	NR_003305	SNORD115-13
129	chr15	25415854	25885555	469701	chr15	25486892	25486974	82	NR_003354	SNORD115-39
129	chr15	25415854	25885555	469701	chr15	25481231	25481313	82	NR_003344	SNORD115-29
129	chr15	25415854	25885555	469701	chr15	25474113	25474195	82	NR_003347	SNORD115-32
129	chr15	25415854	25885555	469701	chr15	25451408	25477615	26207	NR_003313	SNORD115-21
129	chr15	25415854	25885555	469701	chr15	25448373	25448455	82	NR_003311	SNORD115-19
129	chr15	25415854	25885555	469701	chr15	25446469	25446551	82	NR_003309	SNORD115-17
129	chr15	25415854	25885555	469701	chr15	25446469	25446551	82	NR_003311	SNORD115-19
129	chr15	25415854	25885555	469701	chr15	25444594	25444676	82	NR_003308	SNORD115-16
129	chr15	25415854	25885555	469701	chr15	25446469	25446551	82	NR_003310	SNORD115-18
129	chr15	25415854	25885555	469701	chr15	25451408	25451490	82	NR_003312	SNORD115-20
129	chr15	25415854	25885555	469701	chr15	25449503	25449585	82	NR_003311	SNORD115-19
129	chr15	25415854	25885555	469701	chr15	25448373	25448455	82	NR_003310	SNORD115-18
129	chr15	25415854	25885555	469701	chr15	25448373	25448455	82	NR_003309	SNORD115-17
129	chr15	25415854	25885555	469701	chr15	25449503	25449585	82	NR_003309	SNORD115-17
129	chr15	25415854	25885555	469701	chr15	25449503	25449585	82	NR_003310	SNORD115-18
129	chr15	25415854	25885555	469701	chr15	25460687	25460769	82	NR_003342	SNORD115-25
129	chr15	25415854	25885555	469701	chr15	25456838	25457180	342	NR_022010	PAR4
129	chr15	25415854	25885555	469701	chr15	25451408	25477615	26207	NR_003307	SNORD115-15
129	chr15	25415854	25885555	469701	chr15	25455064	25455146	82	NR_003314	SNORD115-22
129	chr15	25415854	25885555	469701	chr15	25456942	25457024	82	NR_003315	SNORD115-23
129	chr15	25415854	25885555	469701	chr15	25458805	25458876	71	NR_003495	SNORD115-24
129	chr15	25415854	25885555	469701	chr15	25468392	25468474	82	NR_003358	SNORD115-43
129	chr15	25415854	25885555	469701	chr15	25468392	25468474	82	NR_003344	SNORD115-29
129	chr15	25415854	25885555	469701	chr15	25468392	25468474	82	NR_003303	SNORD115-11
129	chr15	25415854	25885555	469701	chr15	25463763	25463845	82	NR_003343	SNORD115-26
129	chr15	25415854	25885555	469701	chr15	25465649	25465725	76	NR_003496	SNORD115-27
129	chr15	25415854	25885555	469701	chr15	25467500	25467574	74	NR_003497	SNORD115-28
129	chr15	25415854	25885555	469701	chr15	25468392	25468474	82	NR_003351	SNORD115-36
129	chr15	25415854	25885555	469701	chr15	25470349	25470431	82	NR_003345	SNORD115-30
129	chr15	25415854	25885555	469701	chr15	25472255	25472337	82	NR_003346	SNORD115-31
129	chr15	25415854	25885555	469701	chr15	25477533	25477615	82	NR_003349	SNORD115-34
129	chr15	25415854	25885555	469701	chr15	25475984	25476066	82	NR_003348	SNORD115-33
129	chr15	25415854	25885555	469701	chr15	25479393	25479475	82	NR_003350	SNORD115-35
129	chr15	25415854	25885555	469701	chr15	25481231	25481313	82	NR_003303	SNORD115-11
129	chr15	25415854	25885555	469701	chr15	25483132	25483214	82	NR_003352	SNORD115-37
129	chr15	25415854	25885555	469701	chr15	25481231	25481313	82	NR_003358	SNORD115-43
129	chr15	25415854	25885555	469701	chr15	25481231	25481313	82	NR_003351	SNORD115-36
129	chr15	25415854	25885555	469701	chr15	25484984	25485066	82	NR_003353	SNORD115-38
129	chr15	25415854	25885555	469701	chr15	25514929	25515005	76	NR_003362	SNORD115-48
129	chr15	25415854	25885555	469701	chr15	25496005	25496087	82	NR_003359	SNORD115-44
129	chr15	25415854	25885555	469701	chr15	25492491	25492573	82	NR_003357	SNORD115-42
129	chr15	25415854	25885555	469701	chr15	25490624	25490706	82	NR_003356	SNORD115-41
129	chr15	25415854	25885555	469701	chr15	25488760	25488842	82	NR_003355	SNORD115-40
129	chr15	25415854	25885555	469701	chr15	25492491	25492573	82	NR_003302	SNORD115-10
129	chr15	25415854	25885555	469701	chr15	25494344	25494426	82	NR_003358	SNORD115-43
129	chr15	25415854	25885555	469701	chr15	25494344	25494426	82	NR_003344	SNORD115-29
129	chr15	25415854	25885555	469701	chr15	25494344	25494426	82	NR_003351	SNORD115-36
129	chr15	25415854	25885555	469701	chr15	25494344	25494426	82	NR_003303	SNORD115-11
129	chr15	25415854	25885555	469701	chr15	25509673	25509726	53	NR_003498	SNORD115-45
129	chr15	25415854	25885555	469701	chr15	25513663	25513696	33	NR_003499	SNORD115-47
129	chr15	25415854	25885555	469701	chr15	25523489	25523556	67	NR_001289	SNORD109B
129	chr15	25415854	25885555	469701	chr15	25523489	25523556	67	NR_001295	SNORD109A
129	chr15	25415854	25885555	469701	chr15	25582395	25684175	101780	NM_130839	UBE3A
129	chr15	25415854	25885555	469701	chr15	25582395	25650653	68258	NM_130838	UBE3A
129	chr15	25415854	25885555	469701	chr15	25582395	25684175	101780	NM_000462	UBE3A
130	chr15	27625620	27848725	223105	chr15	27216428	27778373	561945	NM_033223	GABRG3
130	chr15	27625620	27848725	223105	chr15	27216428	27726479	510051	NM_001270873	GABRG3
131	chr15	28528160	28705111	176951	chr15	28671636	28671730	94	NR_039733	MIR4509-2
131	chr15	28528160	28705111	176951	chr15	28671636	28671730	94	NR_039734	MIR4509-3
131	chr15	28528160	28705111	176951	chr15	28356182	28567298	211116	NM_004667	HERC2
131	chr15	28528160	28705111	176951	chr15	28623783	28636412	12629	NR_033351	GOLGA8F
131	chr15	28528160	28705111	176951	chr15	28623783	28637171	13388	NR_033353	GOLGA8G
131	chr15	28528160	28705111	176951	chr15	28671636	28671730	94	NR_039732	MIR4509-1
132	chr15	28731156	28912051	180895	chr15	28735897	28735991	94	NR_039732	MIR4509-1
132	chr15	28731156	28912051	180895	chr15	28735897	28735991	94	NR_039734	MIR4509-3
132	chr15	28731156	28912051	180895	chr15	28764756	28778143	13387	NR_033353	GOLGA8G
132	chr15	28731156	28912051	180895	chr15	28735897	28735991	94	NR_039733	MIR4509-2
132	chr15	28731156	28912051	180895	chr15	28899587	28930410	30823	NR_036443	HERC2P9
132	chr15	28731156	28912051	180895	chr15	28765515	28778143	12628	NR_033351	GOLGA8F
133	chr15	30385087	31093746	708659	chr15	30653442	30685864	32422	NM_148911	CHRFAM7A
133	chr15	30385087	31093746	708659	chr15	30488238	30506743	18505	NR_026771	DKFZP434L187
133	chr15	30385087	31093746	708659	chr15	30395934	30423948	28014	NR_026859	ULK4P3
133	chr15	30385087	31093746	708659	chr15	30427989	30439395	11406	NR_033933	GOLGA8T
133	chr15	30385087	31093746	708659	chr15	30864757	30892911	28154	NR_027470	ULK4P2
133	chr15	30385087	31093746	708659	chr15	30653442	30685864	32422	NM_139320	CHRFAM7A
133	chr15	30385087	31093746	708659	chr15	30950919	31065209	114290	NR_038255	LOC100288637
133	chr15	30385087	31093746	708659	chr15	30950919	31065209	114290	NR_038254	LOC100288637
133	chr15	30385087	31093746	708659	chr15	30918878	30931013	12135	NM_001039841	ARHGAP11B
133	chr15	30385087	31093746	708659	chr15	30864757	30892911	28154	NR_026858	ULK4P1
133	chr15	30385087	31093746	708659	chr15	30938317	31065209	126892	NR_038253	LOC100288637
134	chr15	31182835	31475131	292296	chr15	31293263	31393929	100666	NM_001252024	TRPM1
134	chr15	31182835	31475131	292296	chr15	31196075	31203991	7916	NM_001146096	FAN1
134	chr15	31182835	31475131	292296	chr15	31196054	31203991	7937	NM_001146095	FAN1
134	chr15	31182835	31475131	292296	chr15	31196075	31203991	7916	NM_001146094	FAN1
134	chr15	31182835	31475131	292296	chr15	31196075	31235310	39235	NM_014967	FAN1
134	chr15	31182835	31475131	292296	chr15	31293263	31393929	100666	NM_002420	TRPM1
134	chr15	31182835	31475131	292296	chr15	31293263	31453476	160213	NM_001252020	TRPM1
134	chr15	31182835	31475131	292296	chr15	31231143	31283807	52664	NM_017762	MTMR10
134	chr15	31182835	31475131	292296	chr15	31361592	31393929	32337	NM_001252030	TRPM1
134	chr15	31182835	31475131	292296	chr15	31357234	31357344	110	NR_029624	MIR211
135	chr15	31908441	34877358	2968917	chr15	34817483	34828222	10739	NM_001023567	GOLGA8B
135	chr15	31908441	34877358	2968917	chr15	34522196	34629045	106849	NM_001042497	SLC12A6
135	chr15	31908441	34877358	2968917	chr15	33057744	33360233	302489	NM_001103184	FMN1
135	chr15	31908441	34877358	2968917	chr15	32322685	32462384	139699	NM_001190455	CHRNA7
135	chr15	31908441	34877358	2968917	chr15	31775328	31947542	172214	NM_130901	OTUD7A
135	chr15	31908441	34877358	2968917	chr15	32322685	32462384	139699	NR_046324	CHRNA7
135	chr15	31908441	34877358	2968917	chr15	32698811	32727250	28439	NR_026858	ULK4P1
135	chr15	31908441	34877358	2968917	chr15	32322685	32462384	139699	NM_000746	CHRNA7
135	chr15	31908441	34877358	2968917	chr15	32698811	32727250	28439	NR_027470	ULK4P2
135	chr15	31908441	34877358	2968917	chr15	32698800	32727065	28265	NR_026859	ULK4P3
135	chr15	31908441	34877358	2968917	chr15	32812048	32825942	13894	NR_036650	WHAMMP1
135	chr15	31908441	34877358	2968917	chr15	32734114	32747835	13721	NM_001277308	GOLGA8O
135	chr15	31908441	34877358	2968917	chr15	32828959	32872810	43851	NR_102756	LOC100996255
135	chr15	31908441	34877358	2968917	chr15	33010204	33026870	16666	NM_001191322	GREM1
135	chr15	31908441	34877358	2968917	chr15	32907690	32928382	20692	NM_199357	ARHGAP11A
135	chr15	31908441	34877358	2968917	chr15	32907690	32931868	24178	NM_014783	ARHGAP11A
135	chr15	31908441	34877358	2968917	chr15	32933869	32989298	55429	NM_003020	SCG5
135	chr15	31908441	34877358	2968917	chr15	32933869	32989298	55429	NM_001144757	SCG5
135	chr15	31908441	34877358	2968917	chr15	33010204	33026870	16666	NM_013372	GREM1
135	chr15	31908441	34877358	2968917	chr15	33057744	33486934	429190	NM_001277313	FMN1
135	chr15	31908441	34877358	2968917	chr15	33010204	33026870	16666	NM_001191323	GREM1
135	chr15	31908441	34877358	2968917	chr15	33528676	33539756	11080	NR_046005	TMCO5B
135	chr15	31908441	34877358	2968917	chr15	33441984	33486934	44950	NM_001277314	FMN1
135	chr15	31908441	34877358	2968917	chr15	34522196	34629961	107765	NM_001042496	SLC12A6
135	chr15	31908441	34877358	2968917	chr15	34522196	34630265	108069	NM_001042495	SLC12A6
135	chr15	31908441	34877358	2968917	chr15	33603176	34158303	555127	NM_001243996	RYR3
135	chr15	31908441	34877358	2968917	chr15	33603176	34158303	555127	NM_001036	RYR3
135	chr15	31908441	34877358	2968917	chr15	34522196	34629961	107765	NM_001042494	SLC12A6
135	chr15	31908441	34877358	2968917	chr15	34522196	34629045	106849	NM_133647	SLC12A6
135	chr15	31908441	34877358	2968917	chr15	34158427	34331303	172876	NM_020371	AVEN
135	chr15	31908441	34877358	2968917	chr15	34261088	34357287	96199	NM_012125	CHRM5
135	chr15	31908441	34877358	2968917	chr15	34432874	34502297	69423	NM_024713	KATNBL1
135	chr15	31908441	34877358	2968917	chr15	34376223	34394053	17830	NM_020154	EMC7
135	chr15	31908441	34877358	2968917	chr15	34394273	34396591	2318	NM_152595	PGBD4
135	chr15	31908441	34877358	2968917	chr15	34517244	34522352	5108	NM_016454	EMC4
135	chr15	31908441	34877358	2968917	chr15	34522196	34611021	88825	NM_005135	SLC12A6
135	chr15	31908441	34877358	2968917	chr15	34671269	34729667	58398	NR_027409	GOLGA8A
135	chr15	31908441	34877358	2968917	chr15	34638065	34649931	11866	NM_175741	NUTM1
135	chr15	31908441	34877358	2968917	chr15	34633916	34635362	1446	NM_018648	NOP10
135	chr15	31908441	34877358	2968917	chr15	34671269	34682001	10732	NM_181077	GOLGA8A
135	chr15	31908441	34877358	2968917	chr15	34651088	34659395	8307	NM_153613	LPCAT4
135	chr15	31908441	34877358	2968917	chr15	34674269	34674351	82	NR_036261	MIR1233-2
135	chr15	31908441	34877358	2968917	chr15	34674269	34674351	82	NR_036050	MIR1233-1
135	chr15	31908441	34877358	2968917	chr15	34820490	34820572	82	NR_036261	MIR1233-2
135	chr15	31908441	34877358	2968917	chr15	34817483	34875771	58288	NR_027410	GOLGA8B
135	chr15	31908441	34877358	2968917	chr15	34820490	34820572	82	NR_036050	MIR1233-1
136	chr15	43852144	43988641	136497	chr15	43922771	43941039	18268	NM_172095	CATSPER2
136	chr15	43852144	43988641	136497	chr15	43922771	43941039	18268	NM_054020	CATSPER2
136	chr15	43852144	43988641	136497	chr15	43891760	43910998	19238	NM_153700	STRC
136	chr15	43852144	43988641	136497	chr15	43675287	43894832	219545	NR_046489	RNU6-28P
136	chr15	43852144	43988641	136497	chr15	43825659	43882451	56792	NM_001130859	PPIP5K1
136	chr15	43852144	43988641	136497	chr15	43825659	43882451	56792	NM_001130858	PPIP5K1
136	chr15	43852144	43988641	136497	chr15	43825659	43882451	56792	NM_001190214	PPIP5K1
136	chr15	43852144	43988641	136497	chr15	43825659	43877090	51431	NM_014659	PPIP5K1
136	chr15	43852144	43988641	136497	chr15	43885251	43891604	6353	NM_020990	CKMT1B
136	chr15	43852144	43988641	136497	chr15	43931633	43941039	9406	NM_172097	CATSPER2
136	chr15	43852144	43988641	136497	chr15	43985083	43991420	6337	NM_001015001	CKMT1A
137	chr15	47405682	47604391	198709	chr15	47476402	48066420	590018	NM_001198999	SEMA6D
138	chr15	53861348	54107468	246120	chr15	53805937	54051859	245922	NM_182758	WDR72
138	chr15	53861348	54107468	246120	chr15	53805937	54055075	249138	NR_102334	WDR72
139	chr15	63379905	63545462	165557	chr15	63445538	63449741	4203	NM_015920	RPS27L
139	chr15	63379905	63545462	165557	chr15	63413998	63422026	8028	NM_171846	LACTB
139	chr15	63379905	63545462	165557	chr15	63413998	63434260	20262	NM_032857	LACTB
139	chr15	63379905	63545462	165557	chr15	63481727	63559973	78246	NM_016530	RAB8B
140	chr15	79050392	79319764	269372	chr15	79165122	79190081	24959	NM_001265603	MORF4L1
140	chr15	79050392	79319764	269372	chr15	79051544	79103773	52229	NM_014272	ADAMTS7
140	chr15	79050392	79319764	269372	chr15	79165122	79190081	24959	NM_206839	MORF4L1
140	chr15	79050392	79319764	269372	chr15	79165122	79190081	24959	NM_006791	MORF4L1
140	chr15	79050392	79319764	269372	chr15	79214091	79237420	23329	NM_004390	CTSH
140	chr15	79050392	79319764	269372	chr15	79165330	79190081	24751	NM_001265605	MORF4L1
140	chr15	79050392	79319764	269372	chr15	79165330	79190081	24751	NM_001265604	MORF4L1
140	chr15	79050392	79319764	269372	chr15	79252288	79298002	45714	NM_153815	RASGRF1
140	chr15	79050392	79319764	269372	chr15	79252288	79383215	130927	NM_001145648	RASGRF1
140	chr15	79050392	79319764	269372	chr15	79252288	79383215	130927	NM_002891	RASGRF1
141	chr15	82621224	83057978	436754	chr15	82821160	82824865	3705	NM_001199057	RPS17L
141	chr15	82621224	83057978	436754	chr15	82722184	82731586	9402	NM_198181	GOLGA6L9
141	chr15	82621224	83057978	436754	chr15	82647285	82708204	60919	NR_024474	UBE2Q2P3
141	chr15	82621224	83057978	436754	chr15	82585620	82626915	41295	NR_045529	LOC390660
141	chr15	82621224	83057978	436754	chr15	82647285	82707816	60531	NR_004847	UBE2Q2P2
141	chr15	82621224	83057978	436754	chr15	82633122	82641706	8584	NM_001164465	GOLGA6L10
141	chr15	82621224	83057978	436754	chr15	82753446	82769399	15953	NR_033579	CSPG4P8
141	chr15	82621224	83057978	436754	chr15	82763612	82798352	34740	NR_103496	LOC80154
141	chr15	82621224	83057978	436754	chr15	82763612	82798352	34740	NR_033936	LOC80154
141	chr15	82621224	83057978	436754	chr15	82763612	82798352	34740	NR_026811	LOC80154
141	chr15	82621224	83057978	436754	chr15	82882945	82924242	41297	NR_045529	LOC390660
141	chr15	82621224	83057978	436754	chr15	82821160	82824865	3705	NM_001021	RPS17
141	chr15	82621224	83057978	436754	chr15	82944749	82976258	31509	NR_102747	LOC727751
141	chr15	82621224	83057978	436754	chr15	82944749	82976258	31509	NR_102748	LOC727751
141	chr15	82621224	83057978	436754	chr15	82944792	82976263	31471	NR_026811	LOC80154
141	chr15	82621224	83057978	436754	chr15	82970478	82986427	15949	NR_033579	CSPG4P8
141	chr15	82621224	83057978	436754	chr15	82944792	82976263	31471	NR_103496	LOC80154
141	chr15	82621224	83057978	436754	chr15	82944792	82976263	31471	NR_033936	LOC80154
141	chr15	82621224	83057978	436754	chr15	83023772	83084341	60569	NR_004847	UBE2Q2P2
141	chr15	82621224	83057978	436754	chr15	83009406	83018198	8792	NM_001164465	GOLGA6L10
141	chr15	82621224	83057978	436754	chr15	83023772	83084729	60957	NR_024474	UBE2Q2P3
142	chr15	83097528	83219640	122112	chr15	83211950	83316728	104778	NM_030594	CPEB1
142	chr15	83097528	83219640	122112	chr15	83140198	83182930	42732	NR_103496	LOC80154
142	chr15	83097528	83219640	122112	chr15	83098709	83108111	9402	NM_198181	GOLGA6L9
142	chr15	83097528	83219640	122112	chr15	83130032	83145983	15951	NR_033579	CSPG4P8
142	chr15	83097528	83219640	122112	chr15	83140198	83182930	42732	NR_026811	LOC80154
142	chr15	83097528	83219640	122112	chr15	83140203	83182973	42770	NR_102748	LOC727751
142	chr15	83097528	83219640	122112	chr15	83140198	83182930	42732	NR_033936	LOC80154
142	chr15	83097528	83219640	122112	chr15	83211950	83240573	28623	NM_001079533	CPEB1
142	chr15	83097528	83219640	122112	chr15	83140203	83182973	42770	NR_102747	LOC727751
142	chr15	83097528	83219640	122112	chr15	83205503	83209208	3705	NM_001021	RPS17
142	chr15	83097528	83219640	122112	chr15	83205503	83209208	3705	NM_001199057	RPS17L
142	chr15	83097528	83219640	122112	chr15	83211950	83240573	28623	NM_001079535	CPEB1
142	chr15	83097528	83219640	122112	chr15	83211950	83240573	28623	NM_001079534	CPEB1
143	chr15	84817436	85065305	247869	chr15	84841241	84850985	9744	NM_001243531	LOC100505679
143	chr15	84817436	85065305	247869	chr15	84860599	84878025	17426	NR_033738	LOC440300
143	chr15	84817436	85065305	247869	chr15	84904524	84914120	9596	NM_001267536	GOLGA6L4
143	chr15	84817436	85065305	247869	chr15	84867599	84898920	31321	NR_027001	LOC388152
143	chr15	84817436	85065305	247869	chr15	84868829	84869441	612	NR_049748	LOC642423
143	chr15	84817436	85065305	247869	chr15	85047737	85060078	12341	NR_003246	GOLGA6L5
143	chr15	84817436	85065305	247869	chr15	85045805	85050249	4444	NR_033787	DNM1P41
144	chr15	102391933	102520985	129052	chr15	102462344	102463262	918	NM_001004195	OR4F4
144	chr15	102391933	102520985	129052	chr15	102516760	102519296	2536	NR_034090	DDX11L9
144	chr15	102391933	102520985	129052	chr15	102501015	102516808	15793	NR_003659	WASH3P
144	chr15	102391933	102520985	129052	chr15	102495087	102496558	1471	NR_026819	FAM138E
144	chr15	102391933	102520985	129052	chr15	102516760	102519296	2536	NR_051985	DDX11L9
145	chr14	19000219	23628595	4628376	chr14	23299091	23304246	5155	NM_181307	MRPL52
145	chr14	19000219	23628595	4628376	chr14	21853352	21899867	46515	NM_001170629	CHD8
145	chr14	19000219	23628595	4628376	chr14	20811772	20826063	14291	NM_005484	PARP2
145	chr14	19000219	23628595	4628376	chr14	19670791	19681016	10225	NR_073460	LOC101101776
145	chr14	19000219	23628595	4628376	chr14	19407014	19410111	3097	NR_046104	LOC642426
145	chr14	19000219	23628595	4628376	chr14	19377593	19378574	981	NM_001013354	OR11H12
145	chr14	19000219	23628595	4628376	chr14	19553364	19584942	31578	NR_027480	POTEG
145	chr14	19000219	23628595	4628376	chr14	19553364	19584942	31578	NM_001005356	POTEG
145	chr14	19000219	23628595	4628376	chr14	19894368	19904572	10204	NR_073459	LINC00516
145	chr14	19000219	23628595	4628376	chr14	19670791	19681016	10225	NR_073459	LINC00516
145	chr14	19000219	23628595	4628376	chr14	19894368	19904572	10204	NR_073460	LOC101101776
145	chr14	19000219	23628595	4628376	chr14	20248481	20249423	942	NM_001005500	OR4M1
145	chr14	19000219	23628595	4628376	chr14	19983953	20020272	36319	NM_001145442	POTEM
145	chr14	19000219	23628595	4628376	chr14	20181062	20182491	1429	NM_001197287	OR11H2
145	chr14	19000219	23628595	4628376	chr14	20215586	20216528	942	NM_172194	OR4Q3
145	chr14	19000219	23628595	4628376	chr14	20611894	20612821	927	NM_001004724	OR4N5
145	chr14	19000219	23628595	4628376	chr14	20295607	20296531	924	NM_001004723	OR4N2
145	chr14	19000219	23628595	4628376	chr14	20443677	20444724	1047	NM_001005486	OR4K15
145	chr14	19000219	23628595	4628376	chr14	20388765	20389737	972	NM_001005483	OR4K5
145	chr14	19000219	23628595	4628376	chr14	20344426	20345371	945	NM_001005501	OR4K2
145	chr14	19000219	23628595	4628376	chr14	20403766	20404842	1076	NM_001004063	OR4K1
145	chr14	19000219	23628595	4628376	chr14	20482419	20483352	933	NM_001004712	OR4K14
145	chr14	19000219	23628595	4628376	chr14	20502002	20502917	915	NM_001004714	OR4K13
145	chr14	19000219	23628595	4628376	chr14	20528203	20529142	939	NM_001004717	OR4L1
145	chr14	19000219	23628595	4628376	chr14	20585565	20586597	1032	NM_001004715	OR4K17
145	chr14	19000219	23628595	4628376	chr14	20710950	20711925	975	NM_001004479	OR11H4
145	chr14	19000219	23628595	4628376	chr14	20665494	20666532	1038	NM_001005503	OR11G2
145	chr14	19000219	23628595	4628376	chr14	20691868	20692861	993	NM_001004480	OR11H6
145	chr14	19000219	23628595	4628376	chr14	20779526	20801471	21945	NM_182852	CCNB1IP1
145	chr14	19000219	23628595	4628376	chr14	20757300	20774153	16853	NM_138376	TTC5
145	chr14	19000219	23628595	4628376	chr14	20779526	20801471	21945	NM_182849	CCNB1IP1
145	chr14	19000219	23628595	4628376	chr14	20779526	20801471	21945	NM_021178	CCNB1IP1
145	chr14	19000219	23628595	4628376	chr14	20794599	20794698	99	NR_003693	SNORD126
145	chr14	19000219	23628595	4628376	chr14	20811229	20811570	341	NR_002312	RPPH1
145	chr14	19000219	23628595	4628376	chr14	21156931	21162345	5414	NM_001097577	ANG
145	chr14	19000219	23628595	4628376	chr14	20926011	20929637	3626	NM_144568	TMEM55B
145	chr14	19000219	23628595	4628376	chr14	20896969	20903801	6832	NM_001109997	KLHL33
145	chr14	19000219	23628595	4628376	chr14	20833825	20881579	47754	NM_007110	TEP1
145	chr14	19000219	23628595	4628376	chr14	20811772	20826063	14291	NM_001042618	PARP2
145	chr14	19000219	23628595	4628376	chr14	20923289	20925931	2642	NM_001244249	APEX1
145	chr14	19000219	23628595	4628376	chr14	20923289	20925931	2642	NM_080648	APEX1
145	chr14	19000219	23628595	4628376	chr14	20915206	20923267	8061	NM_017807	OSGEP
145	chr14	19000219	23628595	4628376	chr14	20923289	20925931	2642	NM_080649	APEX1
145	chr14	19000219	23628595	4628376	chr14	20923289	20925931	2642	NM_001641	APEX1
145	chr14	19000219	23628595	4628376	chr14	20926011	20929637	3626	NM_001100814	TMEM55B
145	chr14	19000219	23628595	4628376	chr14	20937537	20946165	8628	NM_000270	PNP
145	chr14	19000219	23628595	4628376	chr14	21024251	21029090	4839	NM_001110359	RNASE9
145	chr14	19000219	23628595	4628376	chr14	21024251	21029090	4839	NM_001110356	RNASE9
145	chr14	19000219	23628595	4628376	chr14	21024251	21029090	4839	NM_001001673	RNASE9
145	chr14	19000219	23628595	4628376	chr14	20978630	20979281	651	NM_001012975	RNASE10
145	chr14	19000219	23628595	4628376	chr14	21152371	21168758	16387	NM_002937	RNASE4
145	chr14	19000219	23628595	4628376	chr14	21108854	21109850	996	NM_001001968	OR6S1
145	chr14	19000219	23628595	4628376	chr14	21024251	21029090	4839	NM_001110357	RNASE9
145	chr14	19000219	23628595	4628376	chr14	21024251	21029090	4839	NM_001110361	RNASE9
145	chr14	19000219	23628595	4628376	chr14	21024251	21029090	4839	NM_001110360	RNASE9
145	chr14	19000219	23628595	4628376	chr14	21051051	21058417	7366	NM_145250	RNASE11
145	chr14	19000219	23628595	4628376	chr14	21024251	21029090	4839	NM_001110358	RNASE9
145	chr14	19000219	23628595	4628376	chr14	21058239	21058982	743	NM_001024822	RNASE12
145	chr14	19000219	23628595	4628376	chr14	21152335	21162345	10010	NM_001145	ANG
145	chr14	19000219	23628595	4628376	chr14	21677295	21737638	60343	NM_001077443	HNRNPC
145	chr14	19000219	23628595	4628376	chr14	21249209	21250626	1417	NM_005615	RNASE6
145	chr14	19000219	23628595	4628376	chr14	21236585	21239107	2522	NM_022360	EDDM3B
145	chr14	19000219	23628595	4628376	chr14	21156931	21168758	11827	NM_194431	RNASE4
145	chr14	19000219	23628595	4628376	chr14	21214098	21216539	2441	NM_006683	EDDM3A
145	chr14	19000219	23628595	4628376	chr14	21467413	21470034	2621	NM_014579	SLC39A2
145	chr14	19000219	23628595	4628376	chr14	21457964	21465194	7230	NM_001029991	METTL17
145	chr14	19000219	23628595	4628376	chr14	21269514	21271036	1522	NM_198235	RNASE1
145	chr14	19000219	23628595	4628376	chr14	21269514	21271036	1522	NM_198234	RNASE1
145	chr14	19000219	23628595	4628376	chr14	21269514	21270558	1044	NM_198232	RNASE1
145	chr14	19000219	23628595	4628376	chr14	21269514	21271036	1522	NM_002933	RNASE1
145	chr14	19000219	23628595	4628376	chr14	21359561	21360507	946	NM_002935	RNASE3
145	chr14	19000219	23628595	4628376	chr14	21423629	21424594	965	NM_002934	RNASE2
145	chr14	19000219	23628595	4628376	chr14	21387499	21388335	836	NR_033909	ECRP
145	chr14	19000219	23628595	4628376	chr14	21457964	21465194	7230	NM_022734	METTL17
145	chr14	19000219	23628595	4628376	chr14	21467413	21470034	2621	NM_001256588	SLC39A2
145	chr14	19000219	23628595	4628376	chr14	21484921	21493935	9014	NM_201537	NDRG2
145	chr14	19000219	23628595	4628376	chr14	21484921	21493935	9014	NM_201536	NDRG2
145	chr14	19000219	23628595	4628376	chr14	21484921	21493935	9014	NM_201535	NDRG2
145	chr14	19000219	23628595	4628376	chr14	21526051	21526516	465	NM_138331	RNASE8
145	chr14	19000219	23628595	4628376	chr14	21484921	21493935	9014	NM_016250	NDRG2
145	chr14	19000219	23628595	4628376	chr14	21484921	21493264	8343	NM_201541	NDRG2
145	chr14	19000219	23628595	4628376	chr14	21484921	21493264	8343	NM_201540	NDRG2
145	chr14	19000219	23628595	4628376	chr14	21484921	21493264	8343	NM_201539	NDRG2
145	chr14	19000219	23628595	4628376	chr14	21484921	21493264	8343	NM_201538	NDRG2
145	chr14	19000219	23628595	4628376	chr14	21510384	21512392	2008	NM_032572	RNASE7
145	chr14	19000219	23628595	4628376	chr14	21500978	21502944	1966	NM_001012264	RNASE13
145	chr14	19000219	23628595	4628376	chr14	21498344	21500332	1988	NM_173846	TPPP2
145	chr14	19000219	23628595	4628376	chr14	21558204	21567173	8969	NM_001101672	ZNF219
145	chr14	19000219	23628595	4628376	chr14	21538526	21558036	19510	NM_018071	ARHGEF40
145	chr14	19000219	23628595	4628376	chr14	21623095	21624184	1089	NM_001004731	OR5AU1
145	chr14	19000219	23628595	4628376	chr14	21558204	21572863	14659	NM_001102454	ZNF219
145	chr14	19000219	23628595	4628376	chr14	21558204	21566808	8604	NM_016423	ZNF219
145	chr14	19000219	23628595	4628376	chr14	21567095	21571883	4788	NM_001146683	TMEM253
145	chr14	19000219	23628595	4628376	chr14	21677295	21737638	60343	NM_001077442	HNRNPC
145	chr14	19000219	23628595	4628376	chr14	21668237	21675059	6822	NR_038971	LINC00641
145	chr14	19000219	23628595	4628376	chr14	21668237	21673662	5425	NR_038970	LINC00641
145	chr14	19000219	23628595	4628376	chr14	21853352	21905457	52105	NM_020920	CHD8
145	chr14	19000219	23628595	4628376	chr14	21756135	21819460	63325	NM_020366	RPGRIP1
145	chr14	19000219	23628595	4628376	chr14	21677295	21737638	60343	NM_004500	HNRNPC
145	chr14	19000219	23628595	4628376	chr14	21677295	21737638	60343	NM_031314	HNRNPC
145	chr14	19000219	23628595	4628376	chr14	21819630	21852425	32795	NM_007192	SUPT16H
145	chr14	19000219	23628595	4628376	chr14	22133296	22134238	942	NM_001001912	OR4E2
145	chr14	19000219	23628595	4628376	chr14	21865451	21865560	109	NR_002916	SNORD8
145	chr14	19000219	23628595	4628376	chr14	21860309	21860412	103	NR_003029	SNORD9
145	chr14	19000219	23628595	4628376	chr14	21927178	21945132	17954	NR_028074	RAB2B
145	chr14	19000219	23628595	4628376	chr14	21927178	21945132	17954	NM_032846	RAB2B
145	chr14	19000219	23628595	4628376	chr14	21927178	21944832	17654	NM_001163380	RAB2B
145	chr14	19000219	23628595	4628376	chr14	21945334	21967319	21985	NM_014828	TOX4
145	chr14	19000219	23628595	4628376	chr14	21989231	22005337	16106	NM_005407	SALL2
145	chr14	19000219	23628595	4628376	chr14	21966281	21979457	13176	NM_019852	METTL3
145	chr14	19000219	23628595	4628376	chr14	22102065	22102998	933	NM_001005466	OR10G2
145	chr14	19000219	23628595	4628376	chr14	22037933	22038875	942	NM_001005465	OR10G3
145	chr14	19000219	23628595	4628376	chr14	23299091	23304246	5155	NM_181306	MRPL52
145	chr14	19000219	23628595	4628376	chr14	23067146	23081265	14119	NM_022060	ABHD4
145	chr14	19000219	23628595	4628376	chr14	23033806	23058143	24337	NM_001344	DAD1
145	chr14	19000219	23628595	4628376	chr14	23242431	23285101	42670	NR_040448	SLC7A7
145	chr14	19000219	23628595	4628376	chr14	23235730	23240998	5268	NM_005015	OXA1L
145	chr14	19000219	23628595	4628376	chr14	23242431	23289020	46589	NM_001126106	SLC7A7
145	chr14	19000219	23628595	4628376	chr14	23242431	23285107	42676	NM_001126105	SLC7A7
145	chr14	19000219	23628595	4628376	chr14	23299091	23304246	5155	NM_181305	MRPL52
145	chr14	19000219	23628595	4628376	chr14	23299091	23304246	5155	NM_181304	MRPL52
145	chr14	19000219	23628595	4628376	chr14	23299091	23304246	5155	NM_180982	MRPL52
145	chr14	19000219	23628595	4628376	chr14	23456109	23479360	23251	NM_001130708	C14orf93
145	chr14	19000219	23628595	4628376	chr14	23456109	23479360	23251	NM_001130706	C14orf93
145	chr14	19000219	23628595	4628376	chr14	23415436	23426351	10915	NM_001166269	HAUS4
145	chr14	19000219	23628595	4628376	chr14	23352431	23356889	4458	NM_173527	REM2
145	chr14	19000219	23628595	4628376	chr14	23299091	23304246	5155	NM_178336	MRPL52
145	chr14	19000219	23628595	4628376	chr14	23305792	23316803	11011	NM_004995	MMP14
145	chr14	19000219	23628595	4628376	chr14	23340959	23347291	6332	NM_014045	LRP10
145	chr14	19000219	23628595	4628376	chr14	23369853	23388396	18543	NM_001077352	RBM23
145	chr14	19000219	23628595	4628376	chr14	23369853	23388396	18543	NM_001077351	RBM23
145	chr14	19000219	23628595	4628376	chr14	23389732	23398661	8929	NM_006109	PRMT5
145	chr14	19000219	23628595	4628376	chr14	23369853	23388396	18543	NM_018107	RBM23
145	chr14	19000219	23628595	4628376	chr14	23389732	23398661	8929	NM_001039619	PRMT5
145	chr14	19000219	23628595	4628376	chr14	23415436	23426351	10915	NM_017815	HAUS4
145	chr14	19000219	23628595	4628376	chr14	23415436	23426351	10915	NM_001166270	HAUS4
145	chr14	19000219	23628595	4628376	chr14	23440409	23446432	6023	NM_198086	AJUBA
145	chr14	19000219	23628595	4628376	chr14	23426158	23426238	80	NR_039856	MIR4707
145	chr14	19000219	23628595	4628376	chr14	23440409	23451848	11439	NM_032876	AJUBA
145	chr14	19000219	23628595	4628376	chr14	23594503	23623659	29156	NM_182728	SLC7A8
145	chr14	19000219	23628595	4628376	chr14	23527773	23540779	13006	NM_001164817	ACIN1
145	chr14	19000219	23628595	4628376	chr14	23495059	23504354	9295	NM_001144932	PSMB5
145	chr14	19000219	23628595	4628376	chr14	23456109	23479360	23251	NM_021944	C14orf93
145	chr14	19000219	23628595	4628376	chr14	23527773	23564823	37050	NM_001164815	ACIN1
145	chr14	19000219	23628595	4628376	chr14	23527773	23564823	37050	NM_001164814	ACIN1
145	chr14	19000219	23628595	4628376	chr14	23495059	23504429	9370	NM_001130725	PSMB5
145	chr14	19000219	23628595	4628376	chr14	23495059	23504354	9295	NM_002797	PSMB5
145	chr14	19000219	23628595	4628376	chr14	23516269	23526747	10478	NM_022478	CDH24
145	chr14	19000219	23628595	4628376	chr14	23511375	23513269	1894	NM_001099780	PSMB11
145	chr14	19000219	23628595	4628376	chr14	23516269	23526747	10478	NM_144985	CDH24
145	chr14	19000219	23628595	4628376	chr14	23564682	23569665	4983	NM_017924	C14orf119
145	chr14	19000219	23628595	4628376	chr14	23527773	23564823	37050	NM_014977	ACIN1
145	chr14	19000219	23628595	4628376	chr14	23527773	23540779	13006	NM_001164816	ACIN1
145	chr14	19000219	23628595	4628376	chr14	23586514	23588820	2306	NM_001805	CEBPE
145	chr14	19000219	23628595	4628376	chr14	23594503	23623659	29156	NM_001267037	SLC7A8
145	chr14	19000219	23628595	4628376	chr14	23594503	23624667	30164	NM_001267036	SLC7A8
145	chr14	19000219	23628595	4628376	chr14	23594503	23624667	30164	NR_049767	SLC7A8
145	chr14	19000219	23628595	4628376	chr14	23594503	23652869	58366	NM_012244	SLC7A8
146	chr14	30760220	31944586	1184366	chr14	31495848	31565656	69808	NM_001254728	AP4S1
146	chr14	30760220	31944586	1184366	chr14	31363004	31495607	132603	NM_001083893	STRN3
146	chr14	30760220	31944586	1184366	chr14	31091459	31205033	113574	NM_016106	SCFD1
146	chr14	30760220	31944586	1184366	chr14	31091459	31205033	113574	NR_047548	SCFD1
146	chr14	30760220	31944586	1184366	chr14	31028328	31089046	60718	NM_017769	G2E3
146	chr14	30760220	31944586	1184366	chr14	31343740	31359822	16082	NM_001135058	COCH
146	chr14	30760220	31944586	1184366	chr14	31091524	31205033	113509	NM_001257376	SCFD1
146	chr14	30760220	31944586	1184366	chr14	31091459	31205033	113574	NR_047547	SCFD1
146	chr14	30760220	31944586	1184366	chr14	31091459	31205033	113574	NM_182835	SCFD1
146	chr14	30760220	31944586	1184366	chr14	31091459	31205033	113574	NR_047546	SCFD1
146	chr14	30760220	31944586	1184366	chr14	31363004	31495607	132603	NM_014574	STRN3
146	chr14	30760220	31944586	1184366	chr14	31345384	31359014	13630	NR_038356	LOC100506071
146	chr14	30760220	31944586	1184366	chr14	31343740	31359822	16082	NM_004086	COCH
146	chr14	30760220	31944586	1184366	chr14	31483851	31483948	97	NR_030354	MIR624
146	chr14	30760220	31944586	1184366	chr14	31494675	31555008	60333	NM_001254726	AP4S1
146	chr14	30760220	31944586	1184366	chr14	31494675	31555008	60333	NM_007077	AP4S1
146	chr14	30760220	31944586	1184366	chr14	31494311	31565656	71345	NM_001254729	AP4S1
146	chr14	30760220	31944586	1184366	chr14	31494675	31565656	70981	NM_001128126	AP4S1
146	chr14	30760220	31944586	1184366	chr14	31494675	31555008	60333	NM_001254727	AP4S1
146	chr14	30760220	31944586	1184366	chr14	31569323	31676689	107366	NM_015382	HECTD1
146	chr14	30760220	31944586	1184366	chr14	31760993	31889788	128795	NM_015473	HEATR5A
146	chr14	30760220	31944586	1184366	chr14	31915242	31926680	11438	NM_080664	DTD2
147	chr14	49893688	50942527	1048839	chr14	50796719	50862617	65898	NM_004196	CDKL1
147	chr14	49893688	50942527	1048839	chr14	50085405	50087403	1998	NM_001001	RPL36AL
147	chr14	49893688	50942527	1048839	chr14	50065414	50081390	15976	NM_152329	LRR1
147	chr14	49893688	50942527	1048839	chr14	50065414	50081390	15976	NM_203467	LRR1
147	chr14	49893688	50942527	1048839	chr14	50043389	50053134	9745	NM_001030001	RPS29
147	chr14	49893688	50942527	1048839	chr14	50065414	50081390	15976	NR_037792	LRR1
147	chr14	49893688	50942527	1048839	chr14	50065414	50081390	15976	NR_037793	LRR1
147	chr14	49893688	50942527	1048839	chr14	50050289	50053134	2845	NM_001032	RPS29
147	chr14	49893688	50942527	1048839	chr14	50234786	50249856	15070	NM_014315	KLHDC2
147	chr14	49893688	50942527	1048839	chr14	50091891	50101948	10057	NM_018139	DNAAF2
147	chr14	49893688	50942527	1048839	chr14	50091891	50101948	10057	NM_001083908	DNAAF2
147	chr14	49893688	50942527	1048839	chr14	50087488	50090199	2711	NM_002408	MGAT2
147	chr14	49893688	50942527	1048839	chr14	50110269	50155098	44829	NM_001197330	POLE2
147	chr14	49893688	50942527	1048839	chr14	50110269	50155098	44829	NM_002692	POLE2
147	chr14	49893688	50942527	1048839	chr14	50159822	50219870	60048	NM_172193	KLHDC1
147	chr14	49893688	50942527	1048839	chr14	50116898	50155098	38200	NM_001197331	POLE2
147	chr14	49893688	50942527	1048839	chr14	50575349	50583297	7948	NM_024558	METTL21D
147	chr14	49893688	50942527	1048839	chr14	50359735	50363772	4037	NM_001663	ARF6
147	chr14	49893688	50942527	1048839	chr14	50250531	50319539	69008	NM_004713	NEMF
147	chr14	49893688	50942527	1048839	chr14	50575349	50583297	7948	NR_049739	METTL21D
147	chr14	49893688	50942527	1048839	chr14	50575349	50583297	7948	NR_049738	METTL21D
147	chr14	49893688	50942527	1048839	chr14	50448429	50474238	25809	NM_001012706	C14orf182
147	chr14	49893688	50942527	1048839	chr14	50550368	50559361	8993	NM_001014830	C14orf183
147	chr14	49893688	50942527	1048839	chr14	50474030	50506602	32572	NR_102736	LOC100506499
147	chr14	49893688	50942527	1048839	chr14	50575349	50583297	7948	NM_001040662	METTL21D
147	chr14	49893688	50942527	1048839	chr14	50583845	50698099	114254	NM_006939	SOS2
147	chr14	49893688	50942527	1048839	chr14	50779046	50792946	13900	NM_001003805	ATP5S
147	chr14	49893688	50942527	1048839	chr14	50779046	50792946	13900	NM_001003803	ATP5S
147	chr14	49893688	50942527	1048839	chr14	50709151	50778947	69796	NM_024884	L2HGDH
147	chr14	49893688	50942527	1048839	chr14	50779046	50792946	13900	NR_033761	ATP5S
147	chr14	49893688	50942527	1048839	chr14	50779046	50789743	10697	NM_015684	ATP5S
147	chr14	49893688	50942527	1048839	chr14	50885210	50999376	114166	NM_198794	MAP4K5
147	chr14	49893688	50942527	1048839	chr14	50885210	50999376	114166	NM_006575	MAP4K5
148	chr14	103610532	103876121	265589	chr14	103800338	103811361	11023	NM_001969	EIF5
148	chr14	103610532	103876121	265589	chr14	103653557	103655365	1808	NR_033938	LINC00605
148	chr14	103610532	103876121	265589	chr14	103851700	103970166	118466	NM_001128920	MARK3
148	chr14	103610532	103876121	265589	chr14	103801197	103811361	10164	NM_183004	EIF5
148	chr14	103610532	103876121	265589	chr14	103851700	103970166	118466	NM_002376	MARK3
148	chr14	103610532	103876121	265589	chr14	103851700	103970166	118466	NM_001128919	MARK3
148	chr14	103610532	103876121	265589	chr14	103851700	103970166	118466	NM_001128921	MARK3
148	chr14	103610532	103876121	265589	chr14	103804185	103804311	126	NR_002964	SNORA28
148	chr14	103610532	103876121	265589	chr14	103851700	103970166	118466	NM_001128918	MARK3
149	chr14	105502541	105688476	185935	chr14	105675622	105714222	38600	NM_145685	BRF1
149	chr14	105502541	105688476	185935	chr14	105639273	105647660	8387	NM_177533	NUDT14
149	chr14	105502541	105688476	185935	chr14	105515736	105531754	16018	NM_013345	GPR132
149	chr14	105502541	105688476	185935	chr14	105607317	105635161	27844	NM_002226	JAG2
149	chr14	105502541	105688476	185935	chr14	105607317	105635161	27844	NM_145159	JAG2
149	chr14	105502541	105688476	185935	chr14	105675622	105715741	40119	NM_001242789	BRF1
149	chr14	105502541	105688476	185935	chr14	105675622	105767329	91707	NM_001242788	BRF1
149	chr14	105502541	105688476	185935	chr14	105675622	105767329	91707	NM_001519	BRF1
149	chr14	105502541	105688476	185935	chr14	105675622	105781914	106292	NM_001242786	BRF1
149	chr14	105502541	105688476	185935	chr14	105675622	105781914	106292	NM_001242787	BRF1
150	chr14	105987102	107289470	1302368	chr14	106383837	106398502	14665	NR_026800	KIAA0125
150	chr14	105987102	107289470	1302368	chr14	105992952	105996539	3587	NM_025268	TMEM121
150	chr14	105987102	107289470	1302368	chr14	106135913	106139144	3231	NR_046211	ELK2AP
150	chr14	105987102	107289470	1302368	chr14	106435818	106438358	2540	NR_002224	ADAM6
150	chr14	105987102	107289470	1302368	chr14	106744268	106744966	698	NR_033375	LINC00226
150	chr14	105987102	107289470	1302368	chr14	106938454	106951529	13075	NR_027457	LINC00221
151	chr19	60070	243098	183028	chr19	76219	77690	1471	NR_026820	FAM138F
151	chr19	60070	243098	183028	chr19	60950	70966	10016	NR_033266	WASH5P
151	chr19	60070	243098	183028	chr19	76219	77690	1471	NR_026818	FAM138A
151	chr19	60070	243098	183028	chr19	197015	202209	5194	NR_028324	FLJ45445
151	chr19	60070	243098	183028	chr19	110678	111596	918	NM_001005240	OR4F17
152	chr19	913713	1317113	403400	chr19	1275519	1279243	3724	NM_017914	C19orf24
152	chr19	913713	1317113	403400	chr19	1009649	1021141	11492	NM_033420	TMEM259
152	chr19	913713	1317113	403400	chr19	984327	994569	10242	NM_024100	WDR18
152	chr19	913713	1317113	403400	chr19	926036	972803	46767	NM_005224	ARID3A
152	chr19	913713	1317113	403400	chr19	917341	921015	3674	NM_032551	KISS1R
152	chr19	913713	1317113	403400	chr19	1000436	1009723	9287	NM_138690	GRIN3B
152	chr19	913713	1317113	403400	chr19	1040101	1065570	25469	NM_019112	ABCA7
152	chr19	913713	1317113	403400	chr19	1026297	1039064	12767	NM_004368	CNN2
152	chr19	913713	1317113	403400	chr19	1026297	1039064	12767	NM_201277	CNN2
152	chr19	913713	1317113	403400	chr19	1009649	1021141	11492	NM_001033026	TMEM259
152	chr19	913713	1317113	403400	chr19	1076632	1086627	9995	NR_047652	HMHA1
152	chr19	913713	1317113	403400	chr19	1067164	1086627	19463	NM_012292	HMHA1
152	chr19	913713	1317113	403400	chr19	1065921	1086627	20706	NM_001258328	HMHA1
152	chr19	913713	1317113	403400	chr19	1269266	1273171	3905	NM_001280	CIRBP
152	chr19	913713	1317113	403400	chr19	1086577	1095391	8814	NM_002695	POLR2E
152	chr19	913713	1317113	403400	chr19	1107632	1174282	66650	NM_014963	SBNO2
152	chr19	913713	1317113	403400	chr19	1103935	1106787	2852	NM_001039847	GPX4
152	chr19	913713	1317113	403400	chr19	1103935	1106787	2852	NM_002085	GPX4
152	chr19	913713	1317113	403400	chr19	1104648	1106787	2139	NM_001039848	GPX4
152	chr19	913713	1317113	403400	chr19	1267469	1270259	2790	NR_027271	CIRBP-AS1
152	chr19	913713	1317113	403400	chr19	1205797	1228434	22637	NM_000455	STK11
152	chr19	913713	1317113	403400	chr19	1107632	1132273	24641	NM_001100122	SBNO2
152	chr19	913713	1317113	403400	chr19	1241748	1244824	3076	NM_001001975	ATP5D
152	chr19	913713	1317113	403400	chr19	1229946	1237990	8044	NM_152769	C19orf26
152	chr19	913713	1317113	403400	chr19	1241748	1244824	3076	NM_001687	ATP5D
152	chr19	913713	1317113	403400	chr19	1248551	1259142	10591	NM_177401	MIDN
152	chr19	913713	1317113	403400	chr19	1269266	1274809	5543	NR_023312	CIRBP
152	chr19	913713	1317113	403400	chr19	1269266	1274809	5543	NR_023313	CIRBP
152	chr19	913713	1317113	403400	chr19	1286152	1301429	15277	NM_001405	EFNA2
153	chr19	1319004	1999796	680792	chr19	1491164	1497924	6760	NM_138393	REEP6
153	chr19	1319004	1999796	680792	chr19	1354975	1378430	23455	NM_032853	MUM1
153	chr19	1319004	1999796	680792	chr19	1407583	1435682	28099	NM_018959	DAZAP1
153	chr19	1319004	1999796	680792	chr19	1397024	1401569	4545	NM_000156	GAMT
153	chr19	1319004	1999796	680792	chr19	1356322	1378430	22108	NR_024247	MUM1
153	chr19	1319004	1999796	680792	chr19	1383882	1395588	11706	NM_024407	NDUFS7
153	chr19	1319004	1999796	680792	chr19	1407583	1435682	28099	NM_170711	DAZAP1
153	chr19	1319004	1999796	680792	chr19	1397809	1401569	3760	NM_138924	GAMT
153	chr19	1319004	1999796	680792	chr19	1438362	1440492	2130	NM_001018	RPS15
153	chr19	1319004	1999796	680792	chr19	1450147	1473243	23096	NM_005883	APC2
153	chr19	1319004	1999796	680792	chr19	1481426	1490407	8981	NM_017573	PCSK4
153	chr19	1319004	1999796	680792	chr19	1473199	1479228	6029	NM_152482	C19orf25
153	chr19	1319004	1999796	680792	chr19	1554667	1568057	13390	NM_001174118	MEX3D
153	chr19	1319004	1999796	680792	chr19	1524072	1535455	11383	NM_001243079	PLK5
153	chr19	1319004	1999796	680792	chr19	1505016	1513188	8172	NM_213604	ADAMTSL5
153	chr19	1319004	1999796	680792	chr19	1554667	1568057	13390	NM_203304	MEX3D
153	chr19	1319004	1999796	680792	chr19	1753661	1775444	21783	NM_001080488	ONECUT3
153	chr19	1319004	1999796	680792	chr19	1597153	1605483	8330	NM_006830	UQCR11
153	chr19	1319004	1999796	680792	chr19	1576677	1592652	15975	NM_003926	MBD3
153	chr19	1319004	1999796	680792	chr19	1609288	1650286	40998	NM_001136139	TCF3
153	chr19	1319004	1999796	680792	chr19	1609288	1652328	43040	NM_003200	TCF3
153	chr19	1319004	1999796	680792	chr19	1782073	1812275	30202	NM_138813	ATP8B3
153	chr19	1319004	1999796	680792	chr19	1782073	1812275	30202	NR_047593	ATP8B3
153	chr19	1319004	1999796	680792	chr19	1905370	1913446	8076	NM_138422	ADAT3
153	chr19	1319004	1999796	680792	chr19	1782073	1812236	30163	NM_001178002	ATP8B3
153	chr19	1319004	1999796	680792	chr19	1816157	1816237	80	NR_031730	MIR1909
153	chr19	1319004	1999796	680792	chr19	1815244	1848452	33208	NM_020695	REXO1
153	chr19	1319004	1999796	680792	chr19	1822087	1824542	2455	NR_034114	LOC100288123
153	chr19	1319004	1999796	680792	chr19	1876974	1885518	8544	NM_001130111	ABHD17A
153	chr19	1319004	1999796	680792	chr19	1852397	1863564	11167	NM_031918	KLF16
153	chr19	1319004	1999796	680792	chr19	1876974	1885518	8544	NM_031213	ABHD17A
153	chr19	1319004	1999796	680792	chr19	1985446	2015702	30256	NM_017797	BTBD2
153	chr19	1319004	1999796	680792	chr19	1941160	1981336	40176	NM_001319	CSNK1G2
153	chr19	1319004	1999796	680792	chr19	1905372	1926012	20640	NM_079834	SCAMP4
153	chr19	1319004	1999796	680792	chr19	1952525	1954548	2023	NR_033400	CSNK1G2-AS1
154	chr19	2688985	2800504	111519	chr19	2511217	2702746	191529	NM_052847	GNG7
154	chr19	2688985	2800504	111519	chr19	2734523	2740074	5551	NM_213568	SLC39A3
154	chr19	2688985	2800504	111519	chr19	2732522	2740074	7552	NM_144564	SLC39A3
154	chr19	2688985	2800504	111519	chr19	2714564	2721390	6826	NM_145173	DIRAS1
154	chr19	2688985	2800504	111519	chr19	2785505	2813599	28094	NM_003249	THOP1
154	chr19	2688985	2800504	111519	chr19	2754711	2783354	28643	NM_003021	SGTA
155	chr19	6867803	7109703	241900	chr19	7004963	7006426	1463	NR_024372	FLJ25758
155	chr19	6867803	7109703	241900	chr19	6887559	6940464	52905	NM_001256255	EMR1
155	chr19	6867803	7109703	241900	chr19	6887559	6940464	52905	NM_001974	EMR1
155	chr19	6867803	7109703	241900	chr19	6887559	6940464	52905	NM_001256252	EMR1
155	chr19	6867803	7109703	241900	chr19	6887559	6940464	52905	NM_001256254	EMR1
155	chr19	6867803	7109703	241900	chr19	6952510	6990857	38347	NR_024075	EMR4P
155	chr19	6867803	7109703	241900	chr19	6887559	6940464	52905	NM_001256253	EMR1
155	chr19	6867803	7109703	241900	chr19	7030593	7033022	2429	NM_001136507	MBD3L5
155	chr19	6867803	7109703	241900	chr19	7037754	7040184	2430	NM_001164419	MBD3L4
155	chr19	6867803	7109703	241900	chr19	7069470	7087978	18508	NM_001044387	ZNF557
155	chr19	6867803	7109703	241900	chr19	7049350	7051746	2396	NM_144614	MBD3L2
155	chr19	6867803	7109703	241900	chr19	7069470	7087978	18508	NM_024341	ZNF557
155	chr19	6867803	7109703	241900	chr19	7056215	7058645	2430	NM_001164425	MBD3L3
155	chr19	6867803	7109703	241900	chr19	7069470	7087978	18508	NM_001044388	ZNF557
156	chr19	20592180	20719831	127651	chr19	20578625	20607771	29146	NR_036455	ZNF826P
157	chr19	22990401	23653303	662902	chr19	23406606	23433172	26566	NR_045525	ZNF724P
157	chr19	22990401	23653303	662902	chr19	23157684	23186010	28326	NM_001267716	ZNF728
157	chr19	22990401	23653303	662902	chr19	23299776	23330014	30238	NM_001277403	ZNF730
157	chr19	22990401	23653303	662902	chr19	23540497	23578269	37772	NM_003430	ZNF91
158	chr19	30272050	30441498	169448	chr19	30433145	30507519	74374	NR_045557	URI1
158	chr19	30272050	30441498	169448	chr19	30302900	30315215	12315	NM_001238	CCNE1
158	chr19	30272050	30441498	169448	chr19	30414550	30507519	92969	NM_001252641	URI1
158	chr19	30272050	30441498	169448	chr19	30433145	30507519	74374	NM_003796	URI1
159	chr19	43208996	43800690	591694	chr19	43568361	43586893	18532	NM_031246	PSG2
159	chr19	43208996	43800690	591694	chr19	43511808	43530631	18823	NM_001113410	PSG11
159	chr19	43208996	43800690	591694	chr19	43341148	43359870	18722	NR_026824	PSG10P
159	chr19	43208996	43800690	591694	chr19	43225793	43244668	18875	NM_021016	PSG3
159	chr19	43208996	43800690	591694	chr19	43256838	43269831	12993	NM_001130168	PSG8
159	chr19	43208996	43800690	591694	chr19	43256838	43269831	12993	NM_001130167	PSG8
159	chr19	43208996	43800690	591694	chr19	43258384	43269831	11447	NM_182707	PSG8
159	chr19	43208996	43800690	591694	chr19	43326014	43331030	5016	NR_036584	LOC100289650
159	chr19	43208996	43800690	591694	chr19	43371357	43383871	12514	NM_006905	PSG1
159	chr19	43208996	43800690	591694	chr19	43370612	43383871	13259	NM_001184826	PSG1
159	chr19	43208996	43800690	591694	chr19	43370612	43383871	13259	NM_001184825	PSG1
159	chr19	43208996	43800690	591694	chr19	43428283	43441330	13047	NM_001206650	PSG7
159	chr19	43208996	43800690	591694	chr19	43406233	43422076	15843	NM_001031850	PSG6
159	chr19	43208996	43800690	591694	chr19	43407767	43422076	14309	NM_002782	PSG6
159	chr19	43208996	43800690	591694	chr19	43428283	43441330	13047	NM_002783	PSG7
159	chr19	43208996	43800690	591694	chr19	43428283	43441330	13047	NR_073194	PSG7
159	chr19	43208996	43800690	591694	chr19	43511808	43530631	18823	NM_203287	PSG11
159	chr19	43208996	43800690	591694	chr19	43511808	43530631	18823	NM_002785	PSG11
159	chr19	43208996	43800690	591694	chr19	43696853	43709926	13073	NM_002780	PSG4
159	chr19	43208996	43800690	591694	chr19	43671894	43690688	18794	NM_001130014	PSG5
159	chr19	43208996	43800690	591694	chr19	43696853	43709926	13073	NM_001276495	PSG4
159	chr19	43208996	43800690	591694	chr19	43671894	43690688	18794	NM_002781	PSG5
159	chr19	43208996	43800690	591694	chr19	43715942	43752798	36856	NR_033888	LOC284344
159	chr19	43208996	43800690	591694	chr19	43696853	43709926	13073	NM_213633	PSG4
159	chr19	43208996	43800690	591694	chr19	43757434	43773682	16248	NM_002784	PSG9
160	chr19	48406667	50644345	2237678	chr19	48432074	48432194	120	NR_024220	SNAR-C1
160	chr19	48406667	50644345	2237678	chr19	48416307	48416427	120	NR_024219	SNAR-C5
160	chr19	48406667	50644345	2237678	chr19	48410934	48411056	122	NR_024216	SNAR-A13
160	chr19	48406667	50644345	2237678	chr19	48416307	48416427	120	NR_024220	SNAR-C1
160	chr19	48406667	50644345	2237678	chr19	48410934	48411056	122	NR_004437	SNAR-A12
160	chr19	48406667	50644345	2237678	chr19	48427035	48427156	121	NR_024226	SNAR-A9
160	chr19	48406667	50644345	2237678	chr19	48421685	48421807	122	NR_004436	SNAR-A2
160	chr19	48406667	50644345	2237678	chr19	48416307	48416427	120	NR_024217	SNAR-C2
160	chr19	48406667	50644345	2237678	chr19	48427035	48427156	121	NR_024227	SNAR-A6
160	chr19	48406667	50644345	2237678	chr19	48427035	48427156	121	NR_024228	SNAR-A8
160	chr19	48406667	50644345	2237678	chr19	48421685	48421807	122	NR_004435	SNAR-A1
160	chr19	48406667	50644345	2237678	chr19	48427035	48427156	121	NR_024229	SNAR-A10
160	chr19	48406667	50644345	2237678	chr19	48427035	48427156	121	NR_024242	SNAR-A14
160	chr19	48406667	50644345	2237678	chr19	48427035	48427156	121	NR_024214	SNAR-A3
160	chr19	48406667	50644345	2237678	chr19	48427035	48427156	121	NR_024225	SNAR-A11
160	chr19	48406667	50644345	2237678	chr19	48427035	48427156	121	NR_024215	SNAR-A4
160	chr19	48406667	50644345	2237678	chr19	48427035	48427156	121	NR_024223	SNAR-A5
160	chr19	48406667	50644345	2237678	chr19	48427035	48427156	121	NR_024224	SNAR-A7
160	chr19	48406667	50644345	2237678	chr19	49458116	49465055	6939	NM_138761	BAX
160	chr19	48406667	50644345	2237678	chr19	49118583	49122675	4092	NR_073022	RPL18
160	chr19	48406667	50644345	2237678	chr19	48828628	48833810	5182	NM_001425	EMP3
160	chr19	48406667	50644345	2237678	chr19	48458938	48459058	120	NR_024219	SNAR-C5
160	chr19	48406667	50644345	2237678	chr19	48432074	48432194	120	NR_024217	SNAR-C2
160	chr19	48406667	50644345	2237678	chr19	48432074	48432194	120	NR_024219	SNAR-C5
160	chr19	48406667	50644345	2237678	chr19	48437437	48437559	122	NR_004435	SNAR-A1
160	chr19	48406667	50644345	2237678	chr19	48437437	48437559	122	NR_004436	SNAR-A2
160	chr19	48406667	50644345	2237678	chr19	48442797	48442917	120	NR_024218	SNAR-C4
160	chr19	48406667	50644345	2237678	chr19	48448178	48448300	122	NR_004437	SNAR-A12
160	chr19	48406667	50644345	2237678	chr19	48448178	48448300	122	NR_024216	SNAR-A13
160	chr19	48406667	50644345	2237678	chr19	48453552	48453671	119	NR_024221	SNAR-C3
160	chr19	48406667	50644345	2237678	chr19	48458938	48459058	120	NR_024220	SNAR-C1
160	chr19	48406667	50644345	2237678	chr19	48471302	48495427	24125	NM_001128326	BSPH1
160	chr19	48406667	50644345	2237678	chr19	48458938	48459058	120	NR_024217	SNAR-C2
160	chr19	48406667	50644345	2237678	chr19	48497907	48528410	30503	NM_022142	ELSPBP1
160	chr19	48406667	50644345	2237678	chr19	48711342	48744320	32978	NR_033679	CARD8
160	chr19	48406667	50644345	2237678	chr19	48551099	48614109	63010	NM_001159323	PLA2G4C
160	chr19	48406667	50644345	2237678	chr19	48532639	48547311	14672	NM_019855	CABP5
160	chr19	48406667	50644345	2237678	chr19	48711342	48753104	41762	NM_001184901	CARD8
160	chr19	48406667	50644345	2237678	chr19	48711342	48744320	32978	NM_001184900	CARD8
160	chr19	48406667	50644345	2237678	chr19	48711342	48753104	41762	NM_014959	CARD8
160	chr19	48406667	50644345	2237678	chr19	48618702	48673560	54858	NM_000234	LIG1
160	chr19	48406667	50644345	2237678	chr19	48551099	48614109	63010	NM_001159322	PLA2G4C
160	chr19	48406667	50644345	2237678	chr19	48551099	48614109	63010	NM_003706	PLA2G4C
160	chr19	48406667	50644345	2237678	chr19	48711342	48752890	41548	NR_033678	CARD8
160	chr19	48406667	50644345	2237678	chr19	48711342	48753104	41762	NM_001184903	CARD8
160	chr19	48406667	50644345	2237678	chr19	48799708	48823332	23624	NM_144577	CCDC114
160	chr19	48406667	50644345	2237678	chr19	48758931	48761450	2519	NR_040599	LOC100505812
160	chr19	48406667	50644345	2237678	chr19	48711342	48752890	41548	NR_033680	CARD8
160	chr19	48406667	50644345	2237678	chr19	48741517	48759203	17686	NM_001184904	CARD8
160	chr19	48406667	50644345	2237678	chr19	48711342	48759203	47861	NM_001184902	CARD8
160	chr19	48406667	50644345	2237678	chr19	48774653	48790863	16210	NM_153608	ZNF114
160	chr19	48406667	50644345	2237678	chr19	48898131	48948188	50057	NM_000836	GRIN2D
160	chr19	48406667	50644345	2237678	chr19	48835615	48867186	31571	NM_018273	TMEM143
160	chr19	48406667	50644345	2237678	chr19	48885826	48894810	8984	NM_006801	KDELR1
160	chr19	48406667	50644345	2237678	chr19	48867650	48879634	11984	NM_012451	SYNGR4
160	chr19	48406667	50644345	2237678	chr19	48958963	48969367	10404	NM_013348	KCNJ14
160	chr19	48406667	50644345	2237678	chr19	48949029	48957164	8135	NM_031485	GRWD1
160	chr19	48406667	50644345	2237678	chr19	49103856	49116694	12838	NM_017708	FAM83E
160	chr19	48406667	50644345	2237678	chr19	48972464	48985571	13107	NM_004228	CYTH2
160	chr19	48406667	50644345	2237678	chr19	48972464	48985571	13107	NM_017457	CYTH2
160	chr19	48406667	50644345	2237678	chr19	49078992	49102684	23692	NM_004605	SULT2B1
160	chr19	48406667	50644345	2237678	chr19	48988527	49016446	27919	NM_001080434	LMTK3
160	chr19	48406667	50644345	2237678	chr19	49055428	49102684	47256	NM_177973	SULT2B1
160	chr19	48406667	50644345	2237678	chr19	49109999	49110971	972	NM_133498	SPACA4
160	chr19	48406667	50644345	2237678	chr19	49223841	49243970	20129	NM_017805	RASIP1
160	chr19	48406667	50644345	2237678	chr19	49128208	49133663	5455	NM_001204160	SPHK2
160	chr19	48406667	50644345	2237678	chr19	49118583	49122675	4092	NM_001270490	RPL18
160	chr19	48406667	50644345	2237678	chr19	49118583	49122675	4092	NM_000979	RPL18
160	chr19	48406667	50644345	2237678	chr19	49122789	49133663	10874	NM_001204159	SPHK2
160	chr19	48406667	50644345	2237678	chr19	49122547	49133663	11116	NM_020126	SPHK2
160	chr19	48406667	50644345	2237678	chr19	49122547	49133663	11116	NM_001204158	SPHK2
160	chr19	48406667	50644345	2237678	chr19	49122547	49133663	11116	NM_001243876	SPHK2
160	chr19	48406667	50644345	2237678	chr19	49216254	49222976	6722	NM_001130915	MAMSTR
160	chr19	48406667	50644345	2237678	chr19	49141295	49185502	44207	NR_004401	SEC1P
160	chr19	48406667	50644345	2237678	chr19	49133816	49140639	6823	NM_001352	DBP
160	chr19	48406667	50644345	2237678	chr19	49141271	49149451	8180	NM_001217	CA11
160	chr19	48406667	50644345	2237678	chr19	49199227	49209191	9964	NM_000511	FUT2
160	chr19	48406667	50644345	2237678	chr19	49164663	49176264	11601	NM_145807	NTN5
160	chr19	48406667	50644345	2237678	chr19	49199227	49209191	9964	NM_001097638	FUT2
160	chr19	48406667	50644345	2237678	chr19	49216254	49220214	3960	NM_182574	MAMSTR
160	chr19	48406667	50644345	2237678	chr19	49298318	49314320	16002	NM_001190	BCAT2
160	chr19	48406667	50644345	2237678	chr19	49244144	49250166	6022	NM_182575	IZUMO1
160	chr19	48406667	50644345	2237678	chr19	49259343	49261582	2239	NM_019113	FGF21
160	chr19	48406667	50644345	2237678	chr19	49251267	49258647	7380	NM_000148	FUT1
160	chr19	48406667	50644345	2237678	chr19	49298318	49314178	15860	NR_028451	BCAT2
160	chr19	48406667	50644345	2237678	chr19	49298318	49314320	16002	NR_028450	BCAT2
160	chr19	48406667	50644345	2237678	chr19	49316273	49339934	23661	NM_016246	HSD17B14
160	chr19	48406667	50644345	2237678	chr19	49298318	49314320	16002	NM_001164773	BCAT2
160	chr19	48406667	50644345	2237678	chr19	49403306	49426540	23234	NM_006184	NUCB1
160	chr19	48406667	50644345	2237678	chr19	49340353	49371884	31531	NM_001161354	PLEKHA4
160	chr19	48406667	50644345	2237678	chr19	49340353	49371884	31531	NM_020904	PLEKHA4
160	chr19	48406667	50644345	2237678	chr19	49384221	49401996	17775	NM_003323	TULP2
160	chr19	48406667	50644345	2237678	chr19	49375648	49379319	3671	NM_014330	PPP1R15A
160	chr19	48406667	50644345	2237678	chr19	49436938	49448226	11288	NM_014475	DHDH
160	chr19	48406667	50644345	2237678	chr19	49458116	49465055	6939	NR_027882	BAX
160	chr19	48406667	50644345	2237678	chr19	50432399	50437193	4794	NM_001193646	ATF5
160	chr19	48406667	50644345	2237678	chr19	50321535	50340237	18702	NM_030973	MED25
160	chr19	48406667	50644345	2237678	chr19	50058724	50083829	25105	NM_015953	NOSIP
160	chr19	48406667	50644345	2237678	chr19	49866986	49878373	11387	NM_001197302	DKKL1
[truncated: 3,005 more rows]

## Sheet: Cooper et al
Merged.CNV.ID	CNV.Chr	CNV.Start	CNV.End	CNV.Size	TX.Chr	TX.Start	TX.End	TX.Length	Accession	GeneSymbol
1	chr13	18361636	24869410	6507774	chr13	20532847	20665968	133121	NM_001190964	ZMYM2
1	chr13	18361636	24869410	6507774	chr13	19408542	19446109	37567	NR_027995	ANKRD20A9P
1	chr13	18361636	24869410	6507774	chr13	19312239	19314239	2000	NR_047508	LINC00417
1	chr13	18361636	24869410	6507774	chr13	20532809	20665968	133159	NM_197968	ZMYM2
1	chr13	18361636	24869410	6507774	chr13	19997018	20077417	80399	NR_073486	TPTE2
1	chr13	18361636	24869410	6507774	chr13	19582398	19586774	4376	NR_026852	LINC00442
1	chr13	18361636	24869410	6507774	chr13	19836939	19919113	82174	NR_027248	ANKRD26P3
1	chr13	18361636	24869410	6507774	chr13	19747909	19755992	8083	NM_006001	TUBA3C
1	chr13	18361636	24869410	6507774	chr13	19717121	19717217	96	NR_046927	RNU6-52P
1	chr13	18361636	24869410	6507774	chr13	19919188	19920889	1701	NR_034026	LINC00421
1	chr13	18361636	24869410	6507774	chr13	19997018	20110903	113885	NM_199254	TPTE2
1	chr13	18361636	24869410	6507774	chr13	19997018	20110903	113885	NM_001141968	TPTE2
1	chr13	18361636	24869410	6507774	chr13	19997018	20012615	15597	NM_001271850	TPTE2
1	chr13	18361636	24869410	6507774	chr13	19997018	20135714	138696	NR_073485	TPTE2
1	chr13	18361636	24869410	6507774	chr13	20248891	20357159	108268	NR_003272	PSPC1
1	chr13	18361636	24869410	6507774	chr13	20207787	20247599	39812	NM_017520	MPHOSPH8
1	chr13	18361636	24869410	6507774	chr13	19997018	20110903	113885	NM_130785	TPTE2
1	chr13	18361636	24869410	6507774	chr13	19997018	20110903	113885	NR_073487	TPTE2
1	chr13	18361636	24869410	6507774	chr13	20248891	20357159	108268	NR_044998	PSPC1
1	chr13	18361636	24869410	6507774	chr13	20532809	20665968	133159	NM_003453	ZMYM2
1	chr13	18361636	24869410	6507774	chr13	20397623	20437776	40153	NM_001142684	ZMYM5
1	chr13	18361636	24869410	6507774	chr13	20277008	20357159	80151	NM_001042414	PSPC1
1	chr13	18361636	24869410	6507774	chr13	20411592	20437776	26184	NM_001039649	ZMYM5
1	chr13	18361636	24869410	6507774	chr13	20411592	20437776	26184	NM_001039650	ZMYM5
1	chr13	18361636	24869410	6507774	chr13	24734860	24881212	146352	NM_153023	SPATA13
1	chr13	18361636	24869410	6507774	chr13	21946709	22033508	86799	NM_153251	ZDHHC20
1	chr13	18361636	24869410	6507774	chr13	21872263	21906210	33947	NR_038939	MIPEPP3
1	chr13	18361636	24869410	6507774	chr13	20796100	20806534	10434	NM_001110221	GJB6
1	chr13	18361636	24869410	6507774	chr13	20712394	20735183	22789	NM_021954	GJA3
1	chr13	18361636	24869410	6507774	chr13	20532973	20665968	132995	NM_001190965	ZMYM2
1	chr13	18361636	24869410	6507774	chr13	20796100	20805372	9272	NM_006783	GJB6
1	chr13	18361636	24869410	6507774	chr13	20796100	20806534	10434	NM_001110219	GJB6
1	chr13	18361636	24869410	6507774	chr13	20796100	20806534	10434	NM_001110220	GJB6
1	chr13	18361636	24869410	6507774	chr13	20761603	20767114	5511	NM_004004	GJB2
1	chr13	18361636	24869410	6507774	chr13	20977805	21100012	122207	NM_015974	CRYL1
1	chr13	18361636	24869410	6507774	chr13	21351467	21476913	125446	NM_022459	XPO4
1	chr13	18361636	24869410	6507774	chr13	21141207	21265576	124369	NM_175605	IFT88
1	chr13	18361636	24869410	6507774	chr13	21141207	21265576	124369	NM_006531	IFT88
1	chr13	18361636	24869410	6507774	chr13	21007916	21007985	69	NR_039721	MIR4499
1	chr13	18361636	24869410	6507774	chr13	21303072	21348057	44985	NM_174928	N6AMT2
1	chr13	18361636	24869410	6507774	chr13	21277481	21297237	19756	NM_138284	IL17D
1	chr13	18361636	24869410	6507774	chr13	21547175	21635722	88547	NM_014572	LATS2
1	chr13	18361636	24869410	6507774	chr13	21714652	21723224	8572	NM_005870	SAP18
1	chr13	18361636	24869410	6507774	chr13	21750371	21753220	2849	NM_024026	MRP63
1	chr13	18361636	24869410	6507774	chr13	21727733	21750741	23008	NM_001166017	SKA3
1	chr13	18361636	24869410	6507774	chr13	21727733	21750741	23008	NM_145061	SKA3
1	chr13	18361636	24869410	6507774	chr13	21872263	21967061	94798	NR_046461	MIPEPP3
1	chr13	18361636	24869410	6507774	chr13	22066827	22178355	111528	NM_152726	MICU2
1	chr13	18361636	24869410	6507774	chr13	24144508	24250244	105736	NM_001204459	TNFRSF19
1	chr13	18361636	24869410	6507774	chr13	23471168	23472320	1152	NR_033774	BASP1P1
1	chr13	18361636	24869410	6507774	chr13	22245214	22278640	33426	NM_002010	FGF9
1	chr13	18361636	24869410	6507774	chr13	22446934	22452299	5365	NR_047040	LINC00424
1	chr13	18361636	24869410	6507774	chr13	23902961	23949682	46721	NM_001278055	SACS
1	chr13	18361636	24869410	6507774	chr13	23755059	23899304	144245	NM_000231	SGCG
1	chr13	18361636	24869410	6507774	chr13	24144508	24250244	105736	NM_148957	TNFRSF19
1	chr13	18361636	24869410	6507774	chr13	23902961	24007867	104906	NM_014363	SACS
1	chr13	18361636	24869410	6507774	chr13	23993109	24003008	9899	NR_103450	SACS-AS1
1	chr13	18361636	24869410	6507774	chr13	24043650	24061603	17953	NR_038995	LINC00327
1	chr13	18361636	24869410	6507774	chr13	24465427	24471125	5698	NM_001007537	C1QTNF9B
1	chr13	18361636	24869410	6507774	chr13	24463027	24466242	3215	NM_001014442	C1QTNF9B-AS1
1	chr13	18361636	24869410	6507774	chr13	24304327	24463587	159260	NM_005932	MIPEP
1	chr13	18361636	24869410	6507774	chr13	24153498	24250244	96746	NM_001204458	TNFRSF19
1	chr13	18361636	24869410	6507774	chr13	24153498	24243412	89914	NM_018647	TNFRSF19
1	chr13	18361636	24869410	6507774	chr13	24463591	24466242	2651	NM_001135816	C1QTNF9B-AS1
1	chr13	18361636	24869410	6507774	chr13	24481422	24523454	42032	NR_073430	ANKRD20A19P
1	chr13	18361636	24869410	6507774	chr13	24736554	24736643	89	NR_031753	MIR2276
1	chr13	18361636	24869410	6507774	chr13	24734860	24881212	146352	NM_001166271	SPATA13
1	chr13	18361636	24869410	6507774	chr13	24826886	24828577	1691	NR_046531	SPATA13-AS1
2	chr13	25656737	25779228	122491	chr13	25670275	25672704	2429	NM_030979	PABPC3
2	chr13	25656737	25779228	122491	chr13	25742671	25745857	3186	NM_199138	AMER2
2	chr13	25656737	25779228	122491	chr13	25742671	25745857	3186	NM_152704	AMER2
3	chr13	26758737	26881228	122491	chr13	26828755	26978569	149814	NM_001260	CDK8
3	chr13	26758737	26881228	122491	chr13	26786904	26796508	9604	NM_005977	RNF6
3	chr13	26758737	26881228	122491	chr13	26786904	26796028	9124	NM_183043	RNF6
3	chr13	26758737	26881228	122491	chr13	26786904	26795894	8990	NM_183044	RNF6
4	chr13	34018987	34328635	309648	chr13	33677271	34250932	573661	NM_001243476	STARD13
5	chr13	35120987	35430635	309648	chr13	35009590	35214822	205232	NR_047036	LINC00457
6	chr13	39096744	39516428	419684	chr13	39261172	39461267	200095	NM_207361	FREM2
6	chr13	39096744	39516428	419684	chr13	39141860	39153653	11793	NR_046999	LINC00366
7	chr13	40198744	40618428	419684	chr13	40229763	40365802	136039	NM_001145079	COG6
7	chr13	40198744	40618428	419684	chr13	40229763	40326765	97002	NR_026745	COG6
7	chr13	40198744	40618428	419684	chr13	40229763	40326765	97002	NM_020751	COG6
7	chr13	40198744	40618428	419684	chr13	40238170	40238272	102	NR_036190	MIR4305
8	chr13	66110974	66975951	864977	chr13	66876965	67804468	927503	NM_020403	PCDH9
8	chr13	66110974	66975951	864977	chr13	66876965	67804468	927503	NM_203487	PCDH9
9	chr13	67212973	71618626	4405653	chr13	71589272	71742549	153277	NR_047699	LINC00348
9	chr13	67212973	71618626	4405653	chr13	70274724	70682625	407901	NM_020866	KLHL1
9	chr13	67212973	71618626	4405653	chr13	69435416	69459457	24041	NR_038878	LINC00550
9	chr13	67212973	71618626	4405653	chr13	66876965	67804468	927503	NM_020403	PCDH9
9	chr13	67212973	71618626	4405653	chr13	66876965	67804468	927503	NM_203487	PCDH9
9	chr13	67212973	71618626	4405653	chr13	67399300	67489163	89863	NR_046527	PCDH9-AS2
9	chr13	67212973	71618626	4405653	chr13	67551520	67559908	8388	NR_046636	PCDH9-AS3
9	chr13	67212973	71618626	4405653	chr13	70681344	70713885	32541	NR_002717	ATXN8OS
10	chr13	84669175	84991360	322185	chr13	84714736	85180903	466167	NR_046871	LINC00333
11	chr13	85771174	86093359	322185	chr13	85937737	86118797	181060	NR_046989	LINC00351
12	chr13	89307099	90295975	988876	chr13	90201047	90216667	15620	NR_046991	LINC00353
13	chr13	90509098	91497974	988876	chr13	90712500	90771971	59471	NR_047489	LINC00559
13	chr13	90509098	91497974	988876	chr13	90883435	90883531	96	NR_030754	MIR622
14	chr13	92065659	92267370	201711	chr13	92050934	93519487	1468553	NM_004466	GPC5
15	chr13	99401059	99446544	45485	chr13	99336054	99404929	68875	NM_005073	SLC15A1
15	chr13	99401059	99446544	45485	chr13	99445740	99630338	184598	NM_001130048	DOCK9
15	chr13	99401059	99446544	45485	chr13	99445740	99738660	292920	NM_015296	DOCK9
16	chr13	100603058	100667750	64692	chr13	100634025	100639019	4994	NM_007129	ZIC2
16	chr13	100603058	100667750	64692	chr13	100615274	100624178	8904	NM_033132	ZIC5
17	chr13	101813384	101869749	56365	chr13	101706129	102068813	362684	NM_052867	NALCN
18	chr13	106989636	107157102	167466	chr13	107028910	107030142	1232	NR_034119	LINC00460
18	chr13	106989636	107157102	167466	chr13	107142078	107187388	45310	NM_004093	EFNB2
19	chr13	108191635	108359101	167466	chr13	107820878	108519460	698582	NM_001080396	FAM155A
20	chr13	113980991	114077261	96270	chr13	113978504	114018463	39959	NM_024719	GRTP1
20	chr13	113980991	114077261	96270	chr13	114076259	114103457	27198	NM_199162	ADPRHL1
20	chr13	113980991	114077261	96270	chr13	114076583	114107839	31256	NM_138430	ADPRHL1
21	chr13	114962889	115059159	96270	chr13	115000361	115038150	37789	NM_001078645	CDC16
21	chr13	114962889	115059159	96270	chr13	115000361	115038150	37789	NM_003903	CDC16
21	chr13	114962889	115059159	96270	chr13	115047058	115071291	24233	NM_080687	UPF3A
21	chr13	114962889	115059159	96270	chr13	115047058	115071291	24233	NM_023011	UPF3A
22	chr12	60861	974773	913912	chr12	862088	1020618	158530	NM_213655	WNK1
22	chr12	60861	974773	913912	chr12	862088	1020618	158530	NM_018979	WNK1
22	chr12	60861	974773	913912	chr12	569542	671058	101516	NM_173593	B4GALNT3
22	chr12	60861	974773	913912	chr12	246576	258332	11756	NR_033859	LOC574538
22	chr12	60861	974773	913912	chr12	176048	287625	111577	NM_001170738	IQSEC3
22	chr12	60861	974773	913912	chr12	147945	149412	1467	NR_026823	FAM138D
22	chr12	60861	974773	913912	chr12	87983	91263	3280	NR_028269	LOC100288778
22	chr12	60861	974773	913912	chr12	186541	280494	93953	NM_015232	IQSEC3
22	chr12	60861	974773	913912	chr12	498515	551806	53291	NM_001130147	CCDC77
22	chr12	60861	974773	913912	chr12	299242	322863	23621	NM_001122847	SLC6A12
22	chr12	60861	974773	913912	chr12	299242	323371	24129	NM_001122848	SLC6A12
22	chr12	60861	974773	913912	chr12	299242	322613	23371	NM_003044	SLC6A12
22	chr12	60861	974773	913912	chr12	299242	323371	24129	NM_001206931	SLC6A12
22	chr12	60861	974773	913912	chr12	368154	372039	3885	NM_001243392	SLC6A13
22	chr12	60861	974773	913912	chr12	329786	372039	42253	NM_016615	SLC6A13
22	chr12	60861	974773	913912	chr12	329786	372039	42253	NM_001190997	SLC6A13
22	chr12	60861	974773	913912	chr12	389222	498620	109398	NM_001042603	KDM5A
22	chr12	60861	974773	913912	chr12	498515	551806	53291	NM_001130148	CCDC77
22	chr12	60861	974773	913912	chr12	510740	551806	41066	NM_001130146	CCDC77
22	chr12	60861	974773	913912	chr12	510740	551806	41066	NM_032358	CCDC77
22	chr12	60861	974773	913912	chr12	673461	772755	99294	NM_016533	NINJ2
22	chr12	60861	974773	913912	chr12	862088	1020618	158530	NM_001184985	WNK1
22	chr12	60861	974773	913912	chr12	862088	1020618	158530	NM_014823	WNK1
23	chr12	1478826	1551652	72826	chr12	1100403	1605099	504696	NM_178040	ERC1
23	chr12	1478826	1551652	72826	chr12	1100403	1605099	504696	NM_178039	ERC1
23	chr12	1478826	1551652	72826	chr12	1100403	1605099	504696	NR_027948	ERC1
23	chr12	1478826	1551652	72826	chr12	1100403	1605099	504696	NR_027946	ERC1
23	chr12	1478826	1551652	72826	chr12	1100403	1605099	504696	NR_027949	ERC1
24	chr12	1608565	1681391	72826	chr12	1609656	1613590	3934	NR_028415	LOC100292680
24	chr12	1608565	1681391	72826	chr12	1675158	1703331	28173	NM_152441	FBXL14
25	chr12	5033324	5456551	423227	chr12	5153084	5155954	2870	NM_002234	KCNA5
26	chr12	7824477	8118037	293560	chr12	7917811	7926717	8906	NM_001145465	NANOGNB
26	chr12	7824477	8118037	293560	chr12	7882010	7902069	20059	NM_203503	CLEC4C
26	chr12	7824477	8118037	293560	chr12	7864088	7870152	6064	NM_199286	DPPA3
26	chr12	7824477	8118037	293560	chr12	7842380	7848360	5980	NM_020634	GDF3
26	chr12	7824477	8118037	293560	chr12	7882010	7902069	20059	NM_130441	CLEC4C
26	chr12	7824477	8118037	293560	chr12	8071823	8088892	17069	NM_006931	SLC2A3
26	chr12	7824477	8118037	293560	chr12	7966396	8025495	59099	NM_153449	SLC2A14
26	chr12	7824477	8118037	293560	chr12	7941994	7948655	6661	NM_024865	NANOG
27	chr12	20899786	21402544	502758	chr12	20848398	20906320	57922	NM_017435	SLCO1C1
27	chr12	20899786	21402544	502758	chr12	20848288	20906320	58032	NM_001145946	SLCO1C1
27	chr12	20899786	21402544	502758	chr12	20848288	20906320	58032	NM_001145945	SLCO1C1
27	chr12	20899786	21402544	502758	chr12	20848398	20906320	57922	NM_001145944	SLCO1C1
27	chr12	20899786	21402544	502758	chr12	21284127	21392730	108603	NM_006446	SLCO1B1
27	chr12	20899786	21402544	502758	chr12	20963637	21069843	106206	NM_019844	SLCO1B3
27	chr12	20899786	21402544	502758	chr12	21168629	21243040	74411	NM_001009562	SLCO1B7
28	chr12	23543231	23807780	264549	chr12	23685230	23737546	52316	NM_178010	SOX5
28	chr12	23543231	23807780	264549	chr12	23685230	24103966	418736	NM_001261415	SOX5
28	chr12	23543231	23807780	264549	chr12	23685230	24715383	1030153	NM_152989	SOX5
28	chr12	23543231	23807780	264549	chr12	23685230	24715383	1030153	NM_001261414	SOX5
28	chr12	23543231	23807780	264549	chr12	23685230	24102637	417407	NM_006940	SOX5
29	chr12	31077924	31399162	321238	chr12	31226778	31257725	30947	NM_004399	DDX11
29	chr12	31077924	31399162	321238	chr12	31173696	31226781	53085	NR_038927	DDX11-AS1
29	chr12	31077924	31399162	321238	chr12	31079837	31149537	69700	NM_001080509	TSPAN11
29	chr12	31077924	31399162	321238	chr12	31226778	31257725	30947	NM_030653	DDX11
29	chr12	31077924	31399162	321238	chr12	31226778	31257725	30947	NM_001257144	DDX11
29	chr12	31077924	31399162	321238	chr12	31226778	31257725	30947	NM_152438	DDX11
29	chr12	31077924	31399162	321238	chr12	31226778	31257725	30947	NM_001257145	DDX11
30	chr12	31899659	31970361	70702	chr12	31944118	31945175	1057	NM_001013699	H3F3C
31	chr12	33418638	34491152	1072514	chr12	33528347	33592754	64407	NM_198992	SYT10
31	chr12	33418638	34491152	1072514	chr12	34175215	34181236	6021	NM_032834	ALG10
32	chr12	40958522	41630451	671929	chr12	41086243	41366519	280276	NM_001256063	CNTN1
32	chr12	40958522	41630451	671929	chr12	41086243	41466213	379970	NM_001843	CNTN1
32	chr12	40958522	41630451	671929	chr12	41582249	41968392	386143	NM_001164595	PDZRN4
32	chr12	40958522	41630451	671929	chr12	41221739	41366519	144780	NM_001256064	CNTN1
32	chr12	40958522	41630451	671929	chr12	41302158	41466213	164055	NM_175038	CNTN1
33	chr12	42672255	43344184	671929	chr12	42719946	42842422	122476	NM_001143787	PPHLN1
33	chr12	42672255	43344184	671929	chr12	42719946	42842422	122476	NM_016488	PPHLN1
33	chr12	42672255	43344184	671929	chr12	42705887	42719932	14045	NM_033114	ZCRB1
33	chr12	42672255	43344184	671929	chr12	42719946	42835765	115819	NM_201439	PPHLN1
33	chr12	42672255	43344184	671929	chr12	42719946	42793227	73281	NM_201438	PPHLN1
33	chr12	42672255	43344184	671929	chr12	42719946	42835765	115819	NM_201515	PPHLN1
33	chr12	42672255	43344184	671929	chr12	42719946	42835765	115819	NM_001143788	PPHLN1
33	chr12	42672255	43344184	671929	chr12	42719946	42835765	115819	NM_201440	PPHLN1
33	chr12	42672255	43344184	671929	chr12	42719946	42835765	115819	NM_001143789	PPHLN1
33	chr12	42672255	43344184	671929	chr12	42852139	42983572	131433	NM_153026	PRICKLE1
33	chr12	42672255	43344184	671929	chr12	42852139	42877797	25658	NM_001144883	PRICKLE1
33	chr12	42672255	43344184	671929	chr12	42852139	42877416	25277	NM_001144881	PRICKLE1
33	chr12	42672255	43344184	671929	chr12	42852139	42877797	25658	NM_001144882	PRICKLE1
34	chr12	45131884	45273648	141764	chr12	44902057	45270247	368190	NM_006159	NELL2
34	chr12	45131884	45273648	141764	chr12	44902057	45270633	368576	NM_001145107	NELL2
34	chr12	45131884	45273648	141764	chr12	44902057	45269444	367387	NM_001145109	NELL2
34	chr12	45131884	45273648	141764	chr12	44902057	45307711	405654	NM_001145110	NELL2
34	chr12	45131884	45273648	141764	chr12	44902057	45270247	368190	NM_001145108	NELL2
35	chr12	48114026	48233128	119102	chr12	48103517	48119355	15838	NM_001172440	ENDOU
35	chr12	48114026	48233128	119102	chr12	48103517	48119355	15838	NM_001172439	ENDOU
35	chr12	48114026	48233128	119102	chr12	48128452	48152889	24437	NM_001098531	RAPGEF3
35	chr12	48114026	48233128	119102	chr12	48103517	48119355	15838	NM_006025	ENDOU
35	chr12	48114026	48233128	119102	chr12	48128452	48152181	23729	NM_001098532	RAPGEF3
35	chr12	48114026	48233128	119102	chr12	48176506	48213763	37257	NM_015401	HDAC7
35	chr12	48114026	48233128	119102	chr12	48128452	48152244	23792	NM_006105	RAPGEF3
35	chr12	48114026	48233128	119102	chr12	48166966	48176536	9570	NM_017842	SLC48A1
35	chr12	48114026	48233128	119102	chr12	48176506	48213763	37257	NM_001098416	HDAC7
36	chr12	55065898	63115073	8049175	chr12	58087737	58115340	27603	NM_006812	OS9
36	chr12	55065898	63115073	8049175	chr12	56435685	56438007	2322	NM_001029	RPS26
36	chr12	55065898	63115073	8049175	chr12	56229213	56236767	7554	NM_002429	MMP19
36	chr12	55065898	63115073	8049175	chr12	55248298	55252174	3876	NM_058173	MUCL1
36	chr12	55065898	63115073	8049175	chr12	55342086	55378530	36444	NM_001136030	TESPA1
36	chr12	55065898	63115073	8049175	chr12	55342086	55367516	25430	NM_001261844	TESPA1
36	chr12	55065898	63115073	8049175	chr12	55758894	55759833	939	NM_001005497	OR6C75
36	chr12	55065898	63115073	8049175	chr12	55342086	55375622	33536	NM_001098815	TESPA1
36	chr12	55065898	63115073	8049175	chr12	55641071	55642010	939	NM_001005490	OR6C74
36	chr12	55065898	63115073	8049175	chr12	55413728	55423801	10073	NM_021191	NEUROD4
36	chr12	55065898	63115073	8049175	chr12	55342086	55367516	25430	NM_014796	TESPA1
36	chr12	55065898	63115073	8049175	chr12	55523552	55524560	1008	NM_001005243	OR9K2
36	chr12	55065898	63115073	8049175	chr12	55614808	55615759	951	NM_001005280	OR10A7
36	chr12	55065898	63115073	8049175	chr12	55725484	55726420	936	NM_054104	OR6C3
36	chr12	55065898	63115073	8049175	chr12	55714383	55715322	939	NM_001005182	OR6C1
36	chr12	55065898	63115073	8049175	chr12	55688071	55689016	945	NM_001005493	OR6C6
36	chr12	55065898	63115073	8049175	chr12	55845997	55846936	939	NM_054105	OR6C2
36	chr12	55065898	63115073	8049175	chr12	55820037	55820976	939	NM_001005183	OR6C76
36	chr12	55065898	63115073	8049175	chr12	55794312	55795251	939	NM_001005518	OR6C65
36	chr12	55065898	63115073	8049175	chr12	56119226	56122266	3040	NM_001257391	CD63
36	chr12	55065898	63115073	8049175	chr12	56119226	56121684	2458	NM_001257400	CD63
36	chr12	55065898	63115073	8049175	chr12	56078353	56101686	23333	NM_001144996	ITGA7
36	chr12	55065898	63115073	8049175	chr12	55945010	55945940	930	NM_001005494	OR6C4
36	chr12	55065898	63115073	8049175	chr12	55886161	55887100	939	NM_001005519	OR6C68
36	chr12	55065898	63115073	8049175	chr12	55862983	55863922	939	NM_001005499	OR6C70
36	chr12	55065898	63115073	8049175	chr12	55968198	55969128	930	NM_001258285	OR2AP1
36	chr12	55065898	63115073	8049175	chr12	56030675	56031617	942	NM_206899	OR10P1
36	chr12	55065898	63115073	8049175	chr12	56078353	56106089	27736	NM_001144997	ITGA7
36	chr12	55065898	63115073	8049175	chr12	56075329	56078394	3065	NM_152637	METTL7B
36	chr12	55065898	63115073	8049175	chr12	56109817	56118526	8709	NR_037658	BLOC1S1-RDH5
36	chr12	55065898	63115073	8049175	chr12	56109817	56113491	3674	NM_001487	BLOC1S1
36	chr12	55065898	63115073	8049175	chr12	56109817	56113491	3674	NR_037655	BLOC1S1
36	chr12	55065898	63115073	8049175	chr12	56078353	56101686	23333	NM_002206	ITGA7
36	chr12	55065898	63115073	8049175	chr12	56114150	56118526	4376	NM_002905	RDH5
36	chr12	55065898	63115073	8049175	chr12	56110075	56113491	3416	NR_037656	BLOC1S1
36	chr12	55065898	63115073	8049175	chr12	56114150	56118526	4376	NM_001199771	RDH5
36	chr12	55065898	63115073	8049175	chr12	56110075	56113491	3416	NR_037657	BLOC1S1
36	chr12	55065898	63115073	8049175	chr12	56119226	56122434	3208	NM_001257390	CD63
36	chr12	55065898	63115073	8049175	chr12	56119226	56122761	3535	NM_001267698	CD63
36	chr12	55065898	63115073	8049175	chr12	56119226	56122922	3696	NM_001780	CD63
36	chr12	55065898	63115073	8049175	chr12	56119226	56121572	2346	NM_001257401	CD63
36	chr12	55065898	63115073	8049175	chr12	56119226	56123457	4231	NM_001257389	CD63
36	chr12	55065898	63115073	8049175	chr12	56223391	56230030	6639	NR_036478	TMEM198B
36	chr12	55065898	63115073	8049175	chr12	56151053	56211540	60487	NM_033082	SARNP
36	chr12	55065898	63115073	8049175	chr12	56146246	56211540	65294	NR_026722	SARNP
36	chr12	55065898	63115073	8049175	chr12	56119226	56122136	2910	NM_001257392	CD63
36	chr12	55065898	63115073	8049175	chr12	56137063	56146665	9602	NM_005811	GDF11
36	chr12	55065898	63115073	8049175	chr12	56146246	56211540	65294	NR_026723	SARNP
36	chr12	55065898	63115073	8049175	chr12	56214743	56223420	8677	NM_032364	DNAJC14
36	chr12	55065898	63115073	8049175	chr12	56211805	56214959	3154	NM_014182	ORMDL2
36	chr12	55065898	63115073	8049175	chr12	56223391	56230030	6639	NR_036479	TMEM198B
36	chr12	55065898	63115073	8049175	chr12	56229213	56236767	7554	NR_073606	MMP19
36	chr12	55065898	63115073	8049175	chr12	56223391	56230030	6639	NR_036477	TMEM198B
36	chr12	55065898	63115073	8049175	chr12	56223391	56230030	6639	NR_036476	TMEM198B
36	chr12	55065898	63115073	8049175	chr12	56229213	56236767	7554	NM_001272101	MMP19
36	chr12	55065898	63115073	8049175	chr12	56360555	56366568	6013	NM_052827	CDK2
36	chr12	55065898	63115073	8049175	chr12	56324945	56347807	22862	NM_001345	DGKA
36	chr12	55065898	63115073	8049175	chr12	56295196	56321697	26501	NM_032345	WIBG
36	chr12	55065898	63115073	8049175	chr12	56295196	56320909	25713	NM_001143853	WIBG
36	chr12	55065898	63115073	8049175	chr12	56347888	56359846	11958	NM_001200054	PMEL
36	chr12	55065898	63115073	8049175	chr12	56347888	56359846	11958	NM_001200053	PMEL
36	chr12	55065898	63115073	8049175	chr12	56347888	56360496	12608	NM_006928	PMEL
36	chr12	55065898	63115073	8049175	chr12	56325811	56347807	21996	NM_201554	DGKA
36	chr12	55065898	63115073	8049175	chr12	56325811	56347807	21996	NM_201444	DGKA
36	chr12	55065898	63115073	8049175	chr12	56325811	56347807	21996	NM_201445	DGKA
36	chr12	55065898	63115073	8049175	chr12	56414688	56432219	17531	NM_022465	IKZF4
36	chr12	55065898	63115073	8049175	chr12	56367794	56390467	22673	NM_002868	RAB5B
36	chr12	55065898	63115073	8049175	chr12	56367696	56390467	22771	NM_001252036	RAB5B
36	chr12	55065898	63115073	8049175	chr12	56360555	56366568	6013	NM_001798	CDK2
36	chr12	55065898	63115073	8049175	chr12	56367794	56390467	22673	NM_001252037	RAB5B
36	chr12	55065898	63115073	8049175	chr12	56391042	56399309	8267	NM_000456	SUOX
36	chr12	55065898	63115073	8049175	chr12	56391042	56399309	8267	NM_001032387	SUOX
36	chr12	55065898	63115073	8049175	chr12	56391042	56399309	8267	NM_001032386	SUOX
36	chr12	55065898	63115073	8049175	chr12	57422300	57444549	22249	NM_001256041	MYO1A
36	chr12	55065898	63115073	8049175	chr12	56862300	56864767	2467	NM_207344	SPRYD4
36	chr12	55065898	63115073	8049175	chr12	56596287	56615485	19198	NM_001242826	RNF41
36	chr12	55065898	63115073	8049175	chr12	56552044	56555366	3322	NM_021019	MYL6
36	chr12	55065898	63115073	8049175	chr12	56510373	56511616	1243	NM_001035267	RPL41
36	chr12	55065898	63115073	8049175	chr12	56473808	56497291	23483	NM_001982	ERBB3
36	chr12	55065898	63115073	8049175	chr12	56473891	56479401	5510	NM_001005915	ERBB3
36	chr12	55065898	63115073	8049175	chr12	56498102	56507694	9592	NM_006191	PA2G4
36	chr12	55065898	63115073	8049175	chr12	56521985	56538460	16475	NM_015292	ESYT1
36	chr12	55065898	63115073	8049175	chr12	56521985	56538460	16475	NM_001184796	ESYT1
36	chr12	55065898	63115073	8049175	chr12	56510373	56511616	1243	NM_021104	RPL41
36	chr12	55065898	63115073	8049175	chr12	56512029	56516278	4249	NM_032786	ZC3H10
36	chr12	55065898	63115073	8049175	chr12	56546203	56551771	5568	NM_002475	MYL6B
36	chr12	55065898	63115073	8049175	chr12	56546203	56551771	5568	NM_001199629	MYL6B
36	chr12	55065898	63115073	8049175	chr12	56555635	56583351	27716	NM_003075	SMARCC2
36	chr12	55065898	63115073	8049175	chr12	56555635	56583351	27716	NM_001130420	SMARCC2
36	chr12	55065898	63115073	8049175	chr12	56552044	56555366	3322	NM_079423	MYL6
36	chr12	55065898	63115073	8049175	chr12	56555635	56583351	27716	NM_139067	SMARCC2
36	chr12	55065898	63115073	8049175	chr12	56596287	56615715	19428	NM_005785	RNF41
36	chr12	55065898	63115073	8049175	chr12	56661066	56664750	3684	NM_001099337	COQ10A
36	chr12	55065898	63115073	8049175	chr12	56596287	56615715	19428	NR_040053	RNF41
36	chr12	55065898	63115073	8049175	chr12	56618124	56623638	5514	NM_024068	NABP2
36	chr12	55065898	63115073	8049175	chr12	56596287	56615753	19466	NM_194359	RNF41
36	chr12	55065898	63115073	8049175	chr12	56596287	56615715	19428	NM_194358	RNF41
36	chr12	55065898	63115073	8049175	chr12	56660641	56664750	4109	NM_144576	COQ10A
36	chr12	55065898	63115073	8049175	chr12	56624500	56631629	7129	NM_001135195	SLC39A5
36	chr12	55065898	63115073	8049175	chr12	56623819	56631629	7810	NM_173596	SLC39A5
36	chr12	55065898	63115073	8049175	chr12	56631590	56652143	20553	NM_173595	ANKRD52
36	chr12	55065898	63115073	8049175	chr12	56665482	56694175	28693	NM_004077	CS
36	chr12	55065898	63115073	8049175	chr12	56710006	56727533	17527	NM_001127460	PAN2
36	chr12	55065898	63115073	8049175	chr12	56710006	56727837	17831	NM_014871	PAN2
36	chr12	55065898	63115073	8049175	chr12	56708257	56710128	1871	NM_001190991	CNPY2
36	chr12	55065898	63115073	8049175	chr12	56704212	56710128	5916	NM_014255	CNPY2
36	chr12	55065898	63115073	8049175	chr12	56735381	56754037	18656	NM_005419	STAT2
36	chr12	55065898	63115073	8049175	chr12	56735381	56754037	18656	NM_198332	STAT2
36	chr12	55065898	63115073	8049175	chr12	56710006	56727837	17831	NM_001166279	PAN2
36	chr12	55065898	63115073	8049175	chr12	56732662	56734194	1532	NM_016584	IL23A
36	chr12	55065898	63115073	8049175	chr12	56754354	56756583	2229	NM_001638	APOF
36	chr12	55065898	63115073	8049175	chr12	56843285	56848435	5150	NM_012064	MIP
36	chr12	55065898	63115073	8049175	chr12	56810156	56843200	33044	NM_003920	TIMELESS
36	chr12	55065898	63115073	8049175	chr12	57037463	57037538	75	NR_003046	SNORD59B
36	chr12	55065898	63115073	8049175	chr12	56864735	56882181	17446	NM_013267	GLS2
36	chr12	55065898	63115073	8049175	chr12	56915608	56989980	74372	NM_002898	RBMS2
36	chr12	55065898	63115073	8049175	chr12	56989379	57030163	40784	NM_013449	BAZ2A
36	chr12	55065898	63115073	8049175	chr12	57031958	57039852	7894	NM_001686	ATP5B
36	chr12	55065898	63115073	8049175	chr12	57057124	57082078	24954	NM_006601	PTGES3
36	chr12	55065898	63115073	8049175	chr12	57038810	57038885	75	NR_002737	SNORD59A
36	chr12	55065898	63115073	8049175	chr12	57403780	57410344	6564	NM_013251	TAC3
36	chr12	55065898	63115073	8049175	chr12	57316937	57328189	11252	NM_148897	SDR9C7
36	chr12	55065898	63115073	8049175	chr12	57125363	57146146	20783	NM_000946	PRIM1
36	chr12	55065898	63115073	8049175	chr12	57106210	57119326	13116	NM_001113203	NACA
36	chr12	55065898	63115073	8049175	chr12	57106210	57119326	13116	NM_001113202	NACA
36	chr12	55065898	63115073	8049175	chr12	57106210	57119066	12856	NR_045277	NACA
36	chr12	55065898	63115073	8049175	chr12	57157107	57181574	24467	NM_003725	HSD17B6
36	chr12	55065898	63115073	8049175	chr12	57403780	57410344	6564	NR_033654	TAC3
36	chr12	55065898	63115073	8049175	chr12	57345215	57351418	6203	NM_003708	RDH16
36	chr12	55065898	63115073	8049175	chr12	57392616	57400297	7681	NM_014830	ZBTB39
36	chr12	55065898	63115073	8049175	chr12	57388354	57390469	2115	NM_007264	GPR182
36	chr12	55065898	63115073	8049175	chr12	57403780	57410344	6564	NM_001178054	TAC3
36	chr12	55065898	63115073	8049175	chr12	57422300	57443901	21601	NM_005379	MYO1A
36	chr12	55065898	63115073	8049175	chr12	57623355	57628718	5363	NM_001166356	SHMT2
36	chr12	55065898	63115073	8049175	chr12	57482676	57489259	6583	NM_005967	NAB2
36	chr12	55065898	63115073	8049175	chr12	57449425	57472574	23149	NM_001130963	TMEM194A
36	chr12	55065898	63115073	8049175	chr12	57449425	57472574	23149	NM_015257	TMEM194A
36	chr12	55065898	63115073	8049175	chr12	57489186	57505196	16010	NM_001178080	STAT6
36	chr12	55065898	63115073	8049175	chr12	57489186	57505196	16010	NM_001178081	STAT6
36	chr12	55065898	63115073	8049175	chr12	57489186	57504089	14903	NM_001178079	STAT6
36	chr12	55065898	63115073	8049175	chr12	57489186	57505196	16010	NM_003153	STAT6
36	chr12	55065898	63115073	8049175	chr12	57489186	57505196	16010	NR_033659	STAT6
36	chr12	55065898	63115073	8049175	chr12	57489186	57505196	16010	NM_001178078	STAT6
36	chr12	55065898	63115073	8049175	chr12	57623355	57628718	5363	NR_029417	SHMT2
36	chr12	55065898	63115073	8049175	chr12	57522281	57607125	84844	NM_002332	LRP1
36	chr12	55065898	63115073	8049175	chr12	57588286	57588359	73	NR_031597	MIR1228
36	chr12	55065898	63115073	8049175	chr12	57610577	57620232	9655	NM_007224	NXPH4
36	chr12	55065898	63115073	8049175	chr12	57623355	57628718	5363	NM_005412	SHMT2
36	chr12	55065898	63115073	8049175	chr12	57923832	57941114	17282	NM_006400	DCTN2
36	chr12	55065898	63115073	8049175	chr12	57853933	57866047	12114	NM_005269	GLI1
36	chr12	55065898	63115073	8049175	chr12	57624142	57628718	4576	NM_001166357	SHMT2
36	chr12	55065898	63115073	8049175	chr12	57623827	57628718	4891	NR_029416	SHMT2
36	chr12	55065898	63115073	8049175	chr12	57623827	57628718	4891	NM_001166358	SHMT2
36	chr12	55065898	63115073	8049175	chr12	57624110	57628718	4608	NM_001166359	SHMT2
36	chr12	55065898	63115073	8049175	chr12	57624110	57628718	4608	NR_029415	SHMT2
36	chr12	55065898	63115073	8049175	chr12	57637241	57644969	7728	NM_145064	STAC3
36	chr12	55065898	63115073	8049175	chr12	57628685	57634475	5790	NM_020142	NDUFA4L2
36	chr12	55065898	63115073	8049175	chr12	57624148	57628718	4570	NR_048562	SHMT2
36	chr12	55065898	63115073	8049175	chr12	57853933	57866047	12114	NM_001167609	GLI1
36	chr12	55065898	63115073	8049175	chr12	57828542	57844609	16067	NM_005538	INHBC
36	chr12	55065898	63115073	8049175	chr12	57647547	57704246	56699	NM_014925	R3HDM2
36	chr12	55065898	63115073	8049175	chr12	57853917	57866047	12130	NM_001160045	GLI1
36	chr12	55065898	63115073	8049175	chr12	57849095	57851791	2696	NM_031479	INHBE
36	chr12	55065898	63115073	8049175	chr12	57910370	57914300	3930	NM_001195053	DDIT3
36	chr12	55065898	63115073	8049175	chr12	57866037	57873424	7387	NM_001080157	ARHGAP9
36	chr12	55065898	63115073	8049175	chr12	57866037	57873633	7596	NM_032496	ARHGAP9
36	chr12	55065898	63115073	8049175	chr12	57866037	57871728	5691	NM_001080156	ARHGAP9
36	chr12	55065898	63115073	8049175	chr12	57910370	57914300	3930	NM_004083	DDIT3
36	chr12	55065898	63115073	8049175	chr12	57910370	57914300	3930	NM_001195057	DDIT3
36	chr12	55065898	63115073	8049175	chr12	57910370	57914300	3930	NM_001195055	DDIT3
36	chr12	55065898	63115073	8049175	chr12	57881735	57910438	28703	NM_004990	MARS
36	chr12	55065898	63115073	8049175	chr12	57910370	57914300	3930	NM_001195056	DDIT3
36	chr12	55065898	63115073	8049175	chr12	57910370	57914300	3930	NM_001195054	DDIT3
36	chr12	55065898	63115073	8049175	chr12	57916658	57923931	7273	NM_052897	MBD6
36	chr12	55065898	63115073	8049175	chr12	57923832	57941114	17282	NM_001261413	DCTN2
36	chr12	55065898	63115073	8049175	chr12	57923832	57941114	17282	NM_001261412	DCTN2
36	chr12	55065898	63115073	8049175	chr12	57984941	57997211	12270	NM_001146258	PIP4K2C
36	chr12	55065898	63115073	8049175	chr12	57943846	57978554	34708	NM_004984	KIF5A
36	chr12	55065898	63115073	8049175	chr12	57984941	57997211	12270	NM_001146259	PIP4K2C
36	chr12	55065898	63115073	8049175	chr12	57984941	57997211	12270	NM_001146260	PIP4K2C
36	chr12	55065898	63115073	8049175	chr12	57984941	57997211	12270	NM_024779	PIP4K2C
36	chr12	55065898	63115073	8049175	chr12	58087737	58115340	27603	NM_001261423	OS9
36	chr12	55065898	63115073	8049175	chr12	58019677	58026464	6787	NM_001276468	B4GALNT1
36	chr12	55065898	63115073	8049175	chr12	58005217	58011028	5811	NR_046223	ARHGEF25
36	chr12	55065898	63115073	8049175	chr12	57998603	58003583	4980	NM_178502	DTX3
36	chr12	55065898	63115073	8049175	chr12	58003962	58011028	7066	NM_001111270	ARHGEF25
36	chr12	55065898	63115073	8049175	chr12	58013692	58019934	6242	NM_133489	SLC26A10
36	chr12	55065898	63115073	8049175	chr12	58005217	58011028	5811	NM_182947	ARHGEF25
36	chr12	55065898	63115073	8049175	chr12	58019677	58027022	7345	NM_001478	B4GALNT1
36	chr12	55065898	63115073	8049175	chr12	58023113	58027022	3909	NM_001276469	B4GALNT1
36	chr12	55065898	63115073	8049175	chr12	58087737	58115340	27603	NM_001017958	OS9
36	chr12	55065898	63115073	8049175	chr12	58087737	58115340	27603	NM_001261421	OS9
36	chr12	55065898	63115073	8049175	chr12	58087737	58115340	27603	NM_001261420	OS9
36	chr12	55065898	63115073	8049175	chr12	58087737	58115340	27603	NM_001261422	OS9
36	chr12	55065898	63115073	8049175	chr12	59989820	60183635	193815	NM_001270622	SLC16A7
36	chr12	55065898	63115073	8049175	chr12	58118075	58135944	17869	NM_014770	AGAP2
36	chr12	55065898	63115073	8049175	chr12	58087737	58115340	27603	NM_001017956	OS9
36	chr12	55065898	63115073	8049175	chr12	58118075	58132029	13954	NM_001122772	AGAP2
36	chr12	55065898	63115073	8049175	chr12	58087737	58115340	27603	NM_001017957	OS9
36	chr12	55065898	63115073	8049175	chr12	58218391	58218475	84	NR_029847	MIR26A2
36	chr12	55065898	63115073	8049175	chr12	58166382	58176324	9942	NM_015433	METTL21B
36	chr12	55065898	63115073	8049175	chr12	58120022	58122139	2117	NR_027032	LOC100130776
36	chr12	55065898	63115073	8049175	chr12	58162350	58165914	3564	NM_005371	METTL1
36	chr12	55065898	63115073	8049175	chr12	58138783	58142026	3243	NM_005981	TSPAN31
36	chr12	55065898	63115073	8049175	chr12	58141509	58146230	4721	NM_000075	CDK4
36	chr12	55065898	63115073	8049175	chr12	58148880	58154193	5313	NM_138396	39873
36	chr12	55065898	63115073	8049175	chr12	58162350	58165914	3564	NM_023033	METTL1
36	chr12	55065898	63115073	8049175	chr12	58156116	58160976	4860	NM_000785	CYP27B1
36	chr12	55065898	63115073	8049175	chr12	58191159	58209852	18693	NM_006576	AVIL
36	chr12	55065898	63115073	8049175	chr12	58176527	58191370	14843	NM_001172696	TSFM
36	chr12	55065898	63115073	8049175	chr12	58176527	58191370	14843	NM_001172695	TSFM
36	chr12	55065898	63115073	8049175	chr12	58166382	58176324	9942	NM_206914	METTL21B
36	chr12	55065898	63115073	8049175	chr12	58176527	58191370	14843	NM_005726	TSFM
36	chr12	55065898	63115073	8049175	chr12	58176527	58196639	20112	NM_001172697	TSFM
36	chr12	55065898	63115073	8049175	chr12	58213709	58240747	27038	NM_005730	CTDSP2
36	chr12	55065898	63115073	8049175	chr12	58335444	58351052	15608	NM_033276	XRCC6BP1
36	chr12	55065898	63115073	8049175	chr12	58325231	58329947	4716	NR_038269	LOC100506844
36	chr12	55065898	63115073	8049175	chr12	59989820	60183635	193815	NM_001270623	SLC16A7
36	chr12	55065898	63115073	8049175	chr12	59265936	59314319	48383	NM_153377	LRIG3
36	chr12	55065898	63115073	8049175	chr12	59265936	59313327	47391	NM_001136051	LRIG3
36	chr12	55065898	63115073	8049175	chr12	62997465	62997549	84	NR_029661	MIRLET7I
36	chr12	55065898	63115073	8049175	chr12	62860596	62991363	130767	NM_015026	MON2
36	chr12	55065898	63115073	8049175	chr12	60083117	60183635	100518	NM_004731	SLC16A7
36	chr12	55065898	63115073	8049175	chr12	60083117	60183635	100518	NR_073055	SLC16A7
36	chr12	55065898	63115073	8049175	chr12	62654120	62803501	149381	NM_006313	USP15
36	chr12	55065898	63115073	8049175	chr12	60083117	60183635	100518	NR_073056	SLC16A7
36	chr12	55065898	63115073	8049175	chr12	62102028	62586620	484592	NM_178539	FAM19A2
36	chr12	55065898	63115073	8049175	chr12	62654120	62730474	76354	NM_001252079	USP15
36	chr12	55065898	63115073	8049175	chr12	62654120	62803501	149381	NM_001252078	USP15
36	chr12	55065898	63115073	8049175	chr12	62995530	62997214	1684	NM_175895	C12orf61
36	chr12	55065898	63115073	8049175	chr12	63037762	63328665	290903	NM_020700	PPM1H
37	chr12	65512108	65544208	32100	chr12	65444403	65515346	70943	NM_007191	WIF1
38	chr12	70190036	70321695	131659	chr12	70132630	70216984	84354	NM_022456	RAB3IP
38	chr12	70190036	70321695	131659	chr12	70132630	70216984	84354	NM_175624	RAB3IP
38	chr12	70190036	70321695	131659	chr12	70133179	70216984	83805	NM_175625	RAB3IP
38	chr12	70190036	70321695	131659	chr12	70133179	70216984	83805	NM_175623	RAB3IP
38	chr12	70190036	70321695	131659	chr12	70172753	70216984	44231	NM_001024647	RAB3IP
39	chr12	71903769	72035428	131659	chr12	72003378	72057749	54371	NM_144982	ZFC3H1
39	chr12	71903769	72035428	131659	chr12	71833549	71980088	146539	NM_001277227	LGR5
39	chr12	71903769	72035428	131659	chr12	71833549	71980088	146539	NM_001277226	LGR5
39	chr12	71903769	72035428	131659	chr12	71833549	71980088	146539	NM_003667	LGR5
40	chr12	92462318	92580079	117761	chr12	92378751	92536447	157696	NR_046160	LOC256021
40	chr12	92462318	92580079	117761	chr12	92378751	92536447	157696	NM_001256373	LOC256021
40	chr12	92462318	92580079	117761	chr12	92378751	92535489	156738	NR_046159	LOC256021
40	chr12	92462318	92580079	117761	chr12	92534053	92539673	5620	NM_001731	BTG1
40	chr12	92462318	92580079	117761	chr12	92378751	92536447	157696	NM_001256375	LOC256021
40	chr12	92462318	92580079	117761	chr12	92378751	92536447	157696	NM_001256374	LOC256021
41	chr12	99412097	99549399	137302	chr12	99137751	99548577	410826	NM_001204070	ANKS1B
41	chr12	99412097	99549399	137302	chr12	99137751	99548577	410826	NM_001204069	ANKS1B
41	chr12	99412097	99549399	137302	chr12	99137751	99548577	410826	NM_001204068	ANKS1B
41	chr12	99412097	99549399	137302	chr12	99137751	99548868	411117	NM_001204067	ANKS1B
41	chr12	99412097	99549399	137302	chr12	99128568	100378432	1249864	NM_152788	ANKS1B
41	chr12	99412097	99549399	137302	chr12	99128568	99548577	420009	NM_020140	ANKS1B
41	chr12	99412097	99549399	137302	chr12	99137751	99548645	410894	NM_001204066	ANKS1B
41	chr12	99412097	99549399	137302	chr12	99137751	99548577	410826	NM_181670	ANKS1B
42	chr12	100887966	101025268	137302	chr12	100967488	101018685	51197	NM_174942	GAS2L3
42	chr12	100887966	101025268	137302	chr12	100867550	100957645	90095	NM_001206979	NR1H4
42	chr12	100887966	101025268	137302	chr12	100897137	100957645	60508	NM_001206993	NR1H4
42	chr12	100887966	101025268	137302	chr12	100867550	100957645	90095	NM_005123	NR1H4
42	chr12	100887966	101025268	137302	chr12	100867550	100957645	90095	NM_001206977	NR1H4
42	chr12	100887966	101025268	137302	chr12	100867550	100957645	90095	NM_001206978	NR1H4
42	chr12	100887966	101025268	137302	chr12	100897137	100957645	60508	NM_001206992	NR1H4
43	chr12	108043462	108152510	109048	chr12	107712196	108053419	341223	NM_001018072	BTBD11
43	chr12	108043462	108152510	109048	chr12	108126642	108154914	28272	NM_012406	PRDM4
43	chr12	108043462	108152510	109048	chr12	108079589	108106257	26668	NM_007062	PWP1
43	chr12	108043462	108152510	109048	chr12	107974633	108053419	78786	NM_001017523	BTBD11
44	chr12	109559079	109668127	109048	chr12	109577201	109706030	128829	NM_001093	ACACB
45	chr12	113530892	113575171	44279	chr12	113536623	113574044	37421	NM_004658	RASAL1
45	chr12	113530892	113575171	44279	chr12	113495661	113535833	40172	NM_004416	DTX1
45	chr12	113530892	113575171	44279	chr12	113536623	113573559	36936	NM_001193521	RASAL1
45	chr12	113530892	113575171	44279	chr12	113536623	113574044	37421	NM_001193520	RASAL1
46	chr12	117450119	117498851	48732	chr12	117348760	117468953	120193	NM_153348	FBXW8
46	chr12	117450119	117498851	48732	chr12	117476727	117537251	60524	NM_017899	TESC
46	chr12	117450119	117498851	48732	chr12	117348760	117468953	120193	NM_012174	FBXW8
46	chr12	117450119	117498851	48732	chr12	117476727	117537251	60524	NM_001168325	TESC
46	chr12	117450119	117498851	48732	chr12	117476727	117537251	60524	NR_031766	TESC
47	chr12	123106377	133767986	10661609	chr12	133360453	133405426	44973	NM_001172557	GOLGA3
47	chr12	123106377	133767986	10661609	chr12	132413744	132428406	14662	NM_001002020	PUS1
47	chr12	123106377	133767986	10661609	chr12	123955908	124018265	62357	NM_178314	RILPL1
47	chr12	123106377	133767986	10661609	chr12	123199302	123201439	2137	NM_006018	HCAR3
47	chr12	123106377	133767986	10661609	chr12	123185839	123187904	2065	NM_177551	HCAR2
47	chr12	123106377	133767986	10661609	chr12	123011808	123110947	99139	NM_014708	KNTC1
47	chr12	123106377	133767986	10661609	chr12	123212152	123215129	2977	NM_032554	HCAR1
47	chr12	123106377	133767986	10661609	chr12	123237370	123255953	18583	NM_003677	DENR
47	chr12	123106377	133767986	10661609	chr12	123259055	123311927	52872	NM_201435	CCDC62
47	chr12	123106377	133767986	10661609	chr12	123259055	123311927	52872	NR_027918	CCDC62
47	chr12	123106377	133767986	10661609	chr12	123773655	123834988	61333	NM_001167856	SBNO1
47	chr12	123106377	133767986	10661609	chr12	123718027	123742506	24479	NM_001194995	C12orf65
47	chr12	123106377	133767986	10661609	chr12	123468026	123594975	126949	NM_020845	PITPNM2
47	chr12	123106377	133767986	10661609	chr12	123320038	123347507	27469	NM_003959	HIP1R
47	chr12	123106377	133767986	10661609	chr12	123349874	123380712	30838	NM_024667	VPS37B
47	chr12	123106377	133767986	10661609	chr12	123405497	123451056	45559	NM_001243014	ABCB9
47	chr12	123106377	133767986	10661609	chr12	123413538	123451056	37518	NM_001243013	ABCB9
47	chr12	123106377	133767986	10661609	chr12	123413538	123451056	37518	NM_019625	ABCB9
47	chr12	123106377	133767986	10661609	chr12	123413538	123451056	37518	NM_019624	ABCB9
47	chr12	123106377	133767986	10661609	chr12	123409071	123451056	41985	NM_203444	ABCB9
47	chr12	123106377	133767986	10661609	chr12	123459353	123464588	5235	NM_024623	OGFOD2
47	chr12	123106377	133767986	10661609	chr12	123464879	123467460	2581	NM_018694	ARL6IP4
47	chr12	123106377	133767986	10661609	chr12	123464879	123467460	2581	NM_001002252	ARL6IP4
47	chr12	123106377	133767986	10661609	chr12	123464879	123467460	2581	NM_001002251	ARL6IP4
47	chr12	123106377	133767986	10661609	chr12	123464879	123467460	2581	NM_016638	ARL6IP4
47	chr12	123106377	133767986	10661609	chr12	123495213	123495275	62	NR_036187	MIR4304
47	chr12	123106377	133767986	10661609	chr12	123640945	123706441	65496	NM_022782	MPHOSPH9
47	chr12	123106377	133767986	10661609	chr12	123565930	123569291	3361	NR_038290	LOC100507091
47	chr12	123106377	133767986	10661609	chr12	123717843	123742506	24663	NM_152269	C12orf65
47	chr12	123106377	133767986	10661609	chr12	123773655	123834988	61333	NM_018183	SBNO1
47	chr12	123106377	133767986	10661609	chr12	123718290	123742506	24216	NM_001143905	C12orf65
47	chr12	123106377	133767986	10661609	chr12	123745516	123756687	11171	NM_004642	CDK2AP1
47	chr12	123106377	133767986	10661609	chr12	123745516	123754781	9265	NM_001270433	CDK2AP1
47	chr12	123106377	133767986	10661609	chr12	123745516	123752801	7285	NM_001270434	CDK2AP1
47	chr12	123106377	133767986	10661609	chr12	123745516	123755649	10133	NR_073008	CDK2AP1
47	chr12	123106377	133767986	10661609	chr12	123745516	123756863	11347	NR_073007	CDK2AP1
47	chr12	123106377	133767986	10661609	chr12	123868703	123893900	25197	NM_020382	SETD8
47	chr12	123106377	133767986	10661609	chr12	123942650	123950937	8287	NM_022717	SNRNP35
47	chr12	123106377	133767986	10661609	chr12	123899935	123921264	21329	NM_145058	RILPL2
47	chr12	123106377	133767986	10661609	chr12	123944385	123950941	6556	NM_180699	SNRNP35
47	chr12	123106377	133767986	10661609	chr12	131274144	131323819	49675	NM_001980	STX2
47	chr12	123106377	133767986	10661609	chr12	125549924	125627871	77947	NM_023928	AACS
47	chr12	123106377	133767986	10661609	chr12	124086671	124105482	18811	NM_020936	DDX55
47	chr12	123106377	133767986	10661609	chr12	124020955	124021081	126	NR_037470	MIR3908
47	chr12	123106377	133767986	10661609	chr12	124069075	124082688	13613	NM_006815	TMED2
47	chr12	123106377	133767986	10661609	chr12	124457761	124800570	342809	NM_001204299	ZNF664-FAM101A
47	chr12	123106377	133767986	10661609	chr12	124118285	124147151	28866	NM_001271867	GTF2H3
47	chr12	123106377	133767986	10661609	chr12	124105569	124118323	12754	NM_001414	EIF2B1
47	chr12	123106377	133767986	10661609	chr12	124420954	124457163	36209	NM_025140	CCDC92
47	chr12	123106377	133767986	10661609	chr12	124118285	124147151	28866	NM_001271866	GTF2H3
47	chr12	123106377	133767986	10661609	chr12	124118285	124147151	28866	NM_001271868	GTF2H3
47	chr12	123106377	133767986	10661609	chr12	124155659	124192950	37291	NM_024809	TCTN2
47	chr12	123106377	133767986	10661609	chr12	124118285	124147151	28866	NM_001516	GTF2H3
47	chr12	123106377	133767986	10661609	chr12	124247041	124420267	173226	NM_207437	DNAH10
47	chr12	123106377	133767986	10661609	chr12	124155659	124192950	37291	NM_001143850	TCTN2
47	chr12	123106377	133767986	10661609	chr12	124196864	124246301	49437	NM_012463	ATP6V0A2
47	chr12	123106377	133767986	10661609	chr12	124457761	124499986	42225	NM_001204298	ZNF664
47	chr12	123106377	133767986	10661609	chr12	124457761	124499986	42225	NM_152437	ZNF664
47	chr12	123106377	133767986	10661609	chr12	125262173	125348519	86346	NM_001082959	SCARB1
47	chr12	123106377	133767986	10661609	chr12	124773709	124800570	26861	NM_181709	FAM101A
47	chr12	123106377	133767986	10661609	chr12	125262173	125348519	86346	NM_005505	SCARB1
47	chr12	123106377	133767986	10661609	chr12	124808956	125052010	243054	NM_001077261	NCOR2
47	chr12	123106377	133767986	10661609	chr12	124808956	125052010	243054	NM_001206654	NCOR2
47	chr12	123106377	133767986	10661609	chr12	124808956	125052010	243054	NM_006312	NCOR2
47	chr12	123106377	133767986	10661609	chr12	125396191	125399587	3396	NM_021009	UBC
47	chr12	123106377	133767986	10661609	chr12	125431369	125473667	42298	NM_032656	DHX37
47	chr12	123106377	133767986	10661609	chr12	125400092	125400205	113	NR_049820	MIR5188
47	chr12	123106377	133767986	10661609	chr12	125478193	125510349	32156	NM_080626	BRI3BP
47	chr12	123106377	133767986	10661609	chr12	130822432	130855925	33493	NM_001190971	PIWIL1
47	chr12	123106377	133767986	10661609	chr12	127221552	127230800	9248	NR_038256	LOC100507206
47	chr12	123106377	133767986	10661609	chr12	125811161	126143589	332428	NM_052907	TMEM132B
47	chr12	123106377	133767986	10661609	chr12	126927026	126957331	30305	NR_015398	LOC100128554
47	chr12	123106377	133767986	10661609	chr12	126443233	126467920	24687	NR_034132	LOC400084
47	chr12	123106377	133767986	10661609	chr12	127215246	127256808	41562	NR_033878	LOC387895
47	chr12	123106377	133767986	10661609	chr12	130647003	130650285	3282	NM_007197	FZD10
47	chr12	123106377	133767986	10661609	chr12	129556270	130388212	831942	NM_133448	TMEM132D
47	chr12	123106377	133767986	10661609	chr12	129277738	129308541	30803	NM_145648	SLC15A4
47	chr12	123106377	133767986	10661609	chr12	128751947	129192460	440513	NM_001136103	TMEM132C
47	chr12	123106377	133767986	10661609	chr12	127354039	127359236	5197	NR_033970	LOC440117
47	chr12	123106377	133767986	10661609	chr12	128399954	128436097	36143	NR_046392	LINC00507
47	chr12	123106377	133767986	10661609	chr12	128366161	128383184	17023	NR_033987	FLJ37505
47	chr12	123106377	133767986	10661609	chr12	128778636	128778723	87	NR_037406	MIR3612
47	chr12	123106377	133767986	10661609	chr12	129338080	129469509	131429	NM_144669	GLT1D1
47	chr12	123106377	133767986	10661609	chr12	130518356	130526887	8531	NR_024457	LOC100190940
47	chr12	123106377	133767986	10661609	chr12	130636137	130646223	10086	NR_033834	FLJ31485
47	chr12	123106377	133767986	10661609	chr12	130880680	131002410	121730	NM_015347	RIMBP2
47	chr12	123106377	133767986	10661609	chr12	130822432	130856877	34445	NM_004764	PIWIL1
47	chr12	123106377	133767986	10661609	chr12	132195631	132284283	88652	NM_004592	SFSWAP
47	chr12	123106377	133767986	10661609	chr12	131438451	131626008	187557	NM_198827	GPR133
47	chr12	123106377	133767986	10661609	chr12	131274144	131323819	49675	NM_194356	STX2
47	chr12	123106377	133767986	10661609	chr12	131356616	131360826	4210	NM_006325	RAN
47	chr12	123106377	133767986	10661609	chr12	131649555	131697476	47921	NR_026670	LOC116437
47	chr12	123106377	133767986	10661609	chr12	132195631	132284283	88652	NM_001261411	SFSWAP
47	chr12	123106377	133767986	10661609	chr12	132379278	132407707	28429	NM_003565	ULK1
47	chr12	123106377	133767986	10661609	chr12	132312940	132336316	23376	NM_016155	MMP17
47	chr12	123106377	133767986	10661609	chr12	133302253	133338451	36198	NM_015114	ANKLE2
47	chr12	123106377	133767986	10661609	chr12	132851976	132857486	5510	NR_024563	LOC100130238
47	chr12	123106377	133767986	10661609	chr12	132413812	132428406	14594	NM_025215	PUS1
47	chr12	123106377	133767986	10661609	chr12	132413797	132428406	14609	NM_001002019	PUS1
47	chr12	123106377	133767986	10661609	chr12	132434464	132565011	130547	NM_015409	EP400
47	chr12	123106377	133767986	10661609	chr12	132515768	132515905	137	NR_002979	SNORA49
47	chr12	123106377	133767986	10661609	chr12	132680916	132905905	224989	NM_001122636	GALNT9
47	chr12	123106377	133767986	10661609	chr12	132628992	132636986	7994	NM_024078	NOC4L
47	chr12	123106377	133767986	10661609	chr12	132621139	132628880	7741	NM_175066	DDX51
47	chr12	123106377	133767986	10661609	chr12	132568827	132610885	42058	NR_003290	EP400NL
47	chr12	123106377	133767986	10661609	chr12	132680916	132690573	9657	NM_021808	GALNT9
47	chr12	123106377	133767986	10661609	chr12	133287392	133299323	11931	NM_001170543	PGAM5
47	chr12	123106377	133767986	10661609	chr12	133195402	133198972	3570	NM_174873	P2RX2
47	chr12	123106377	133767986	10661609	chr12	133195402	133198972	3570	NM_174872	P2RX2
47	chr12	123106377	133767986	10661609	chr12	133067156	133161773	94617	NM_001142641	FBRSL1
47	chr12	123106377	133767986	10661609	chr12	133195402	133198972	3570	NM_170683	P2RX2
47	chr12	123106377	133767986	10661609	chr12	133179735	133187037	7302	NM_001195520	LRCOL1
47	chr12	123106377	133767986	10661609	chr12	133195402	133198972	3570	NM_170682	P2RX2
47	chr12	123106377	133767986	10661609	chr12	133195402	133198972	3570	NM_012226	P2RX2
47	chr12	123106377	133767986	10661609	chr12	133195402	133198972	3570	NM_016318	P2RX2
47	chr12	123106377	133767986	10661609	chr12	133264191	133281577	17386	NM_018663	PXMP2
47	chr12	123106377	133767986	10661609	chr12	133200347	133263945	63598	NM_006231	POLE
47	chr12	123106377	133767986	10661609	chr12	133287392	133295752	8360	NM_138575	PGAM5
47	chr12	123106377	133767986	10661609	chr12	133287392	133299323	11931	NM_001170544	PGAM5
47	chr12	123106377	133767986	10661609	chr12	133345494	133405288	59794	NM_005895	GOLGA3
47	chr12	123106377	133767986	10661609	chr12	133416937	133464204	47267	NM_018223	CHFR
47	chr12	123106377	133767986	10661609	chr12	133757994	133783697	25703	NM_001165886	ZNF268
47	chr12	123106377	133767986	10661609	chr12	133757994	133783697	25703	NM_003415	ZNF268
47	chr12	123106377	133767986	10661609	chr12	133416937	133464204	47267	NM_001161346	CHFR
47	chr12	123106377	133767986	10661609	chr12	133416937	133464204	47267	NM_001161345	CHFR
47	chr12	123106377	133767986	10661609	chr12	133416937	133464204	47267	NM_001161344	CHFR
47	chr12	123106377	133767986	10661609	chr12	133613877	133639885	26008	NM_003428	ZNF84
47	chr12	123106377	133767986	10661609	chr12	133498018	133532868	34850	NM_183238	ZNF605
47	chr12	123106377	133767986	10661609	chr12	133416937	133464204	47267	NM_001161347	CHFR
47	chr12	123106377	133767986	10661609	chr12	133562933	133589154	26221	NM_001256279	ZNF26
47	chr12	123106377	133767986	10661609	chr12	133498018	133532892	34874	NM_001164715	ZNF605
47	chr12	123106377	133767986	10661609	chr12	133562933	133589154	26221	NM_019591	ZNF26
47	chr12	123106377	133767986	10661609	chr12	133562933	133589154	26221	NM_001256280	ZNF26
47	chr12	123106377	133767986	10661609	chr12	133613979	133639885	25906	NM_001127372	ZNF84
47	chr12	123106377	133767986	10661609	chr12	133657036	133684258	27222	NM_003440	ZNF140
47	chr12	123106377	133767986	10661609	chr12	133707213	133736049	28836	NM_015394	ZNF10
47	chr12	123106377	133767986	10661609	chr12	133696554	133707059	10505	NM_001277291	ZNF891
47	chr12	123106377	133767986	10661609	chr12	133757994	133783697	25703	NM_001165883	ZNF268
47	chr12	123106377	133767986	10661609	chr12	133757994	133783697	25703	NM_001165884	ZNF268
47	chr12	123106377	133767986	10661609	chr12	133757994	133783697	25703	NM_001165885	ZNF268
47	chr12	123106377	133767986	10661609	chr12	133757994	133783697	25703	NM_152943	ZNF268
47	chr12	123106377	133767986	10661609	chr12	133757994	133783697	25703	NM_001165887	ZNF268
47	chr12	123106377	133767986	10661609	chr12	133758059	133783697	25638	NM_001165882	ZNF268
47	chr12	123106377	133767986	10661609	chr12	133758059	133783697	25638	NM_001165881	ZNF268
48	chr11	643154	780756	137602	chr11	644224	695740	51516	NM_021008	DEAF1
48	chr11	643154	780756	137602	chr11	695590	705028	9438	NM_001276274	TMEM80
48	chr11	643154	780756	137602	chr11	695590	704131	8541	NM_001276253	TMEM80
48	chr11	643154	780756	137602	chr11	695590	704131	8541	NM_174940	TMEM80
48	chr11	643154	780756	137602	chr11	695590	704131	8541	NM_001042463	TMEM80
48	chr11	643154	780756	137602	chr11	779453	780755	1302	NR_046316	NS3BP
48	chr11	643154	780756	137602	chr11	706119	727727	21608	NM_022772	EPS8L2
48	chr11	643154	780756	137602	chr11	767222	777487	10265	NM_182612	PDDC1
48	chr11	643154	780756	137602	chr11	747431	765024	17593	NM_006755	TALDO1
49	chr11	863975	978573	114598	chr11	844445	867116	22671	NM_001025237	TSPAN4
49	chr11	863975	978573	114598	chr11	844080	867116	23036	NM_001025234	TSPAN4
49	chr11	863975	978573	114598	chr11	842940	867116	24176	NM_001025236	TSPAN4
49	chr11	863975	978573	114598	chr11	842823	867116	24293	NM_003271	TSPAN4
49	chr11	863975	978573	114598	chr11	842823	867116	24293	NM_001025239	TSPAN4
49	chr11	863975	978573	114598	chr11	842823	867116	24293	NM_001025238	TSPAN4
49	chr11	863975	978573	114598	chr11	842940	867116	24176	NM_001025235	TSPAN4
49	chr11	863975	978573	114598	chr11	867858	910874	43016	NM_001142674	CHID1
49	chr11	863975	978573	114598	chr11	867858	910874	43016	NM_023947	CHID1
49	chr11	863975	978573	114598	chr11	867858	910874	43016	NM_001142677	CHID1
49	chr11	863975	978573	114598	chr11	867858	915058	47200	NM_001142675	CHID1
49	chr11	863975	978573	114598	chr11	867858	910874	43016	NM_001142676	CHID1
49	chr11	863975	978573	114598	chr11	925808	1012245	86437	NM_012305	AP2A2
49	chr11	863975	978573	114598	chr11	925808	1012245	86437	NM_001242837	AP2A2
50	chr11	3634835	3980746	345911	chr11	3829239	3847601	18362	NM_001256238	PGAP2
50	chr11	3634835	3980746	345911	chr11	3819048	3847601	28553	NR_045925	PGAP2
50	chr11	3634835	3980746	345911	chr11	3818953	3847601	28648	NM_001256235	PGAP2
50	chr11	3634835	3980746	345911	chr11	3733058	3819022	85964	NM_139131	NUP98
50	chr11	3634835	3980746	345911	chr11	3696239	3819022	122783	NM_016320	NUP98
50	chr11	3634835	3980746	345911	chr11	3696239	3819022	122783	NM_139132	NUP98
50	chr11	3634835	3980746	345911	chr11	3666360	3685646	19286	NM_004314	ART1
50	chr11	3634835	3980746	345911	chr11	3659735	3663485	3750	NM_053017	ART5
50	chr11	3634835	3980746	345911	chr11	3659735	3663546	3811	NM_001079536	ART5
50	chr11	3634835	3980746	345911	chr11	3647689	3658789	11100	NR_002720	TRPC2
50	chr11	3634835	3980746	345911	chr11	3686816	3692614	5798	NM_020402	CHRNA10
50	chr11	3634835	3980746	345911	chr11	3733058	3819022	85964	NM_005387	NUP98
50	chr11	3634835	3980746	345911	chr11	3819048	3847601	28553	NR_045923	PGAP2
50	chr11	3634835	3980746	345911	chr11	3829239	3847601	18362	NR_027018	PGAP2
50	chr11	3634835	3980746	345911	chr11	3819188	3847601	28413	NR_027017	PGAP2
50	chr11	3634835	3980746	345911	chr11	3819048	3847601	28553	NM_001145438	PGAP2
50	chr11	3634835	3980746	345911	chr11	3819048	3847601	28553	NM_001256236	PGAP2
50	chr11	3634835	3980746	345911	chr11	3819048	3847601	28553	NR_045927	PGAP2
50	chr11	3634835	3980746	345911	chr11	3819048	3847601	28553	NR_045926	PGAP2
50	chr11	3634835	3980746	345911	chr11	3819048	3847601	28553	NM_001256237	PGAP2
50	chr11	3634835	3980746	345911	chr11	3829765	3847601	17836	NM_001256240	PGAP2
50	chr11	3634835	3980746	345911	chr11	3829765	3847601	17836	NM_014489	PGAP2
50	chr11	3634835	3980746	345911	chr11	3829765	3847601	17836	NM_001256239	PGAP2
50	chr11	3634835	3980746	345911	chr11	3829765	3847601	17836	NR_045929	PGAP2
50	chr11	3634835	3980746	345911	chr11	3829765	3847601	17836	NR_027016	PGAP2
50	chr11	3634835	3980746	345911	chr11	3876932	4114440	237508	NM_003156	STIM1
50	chr11	3634835	3980746	345911	chr11	3848207	3862213	14006	NM_001665	RHOG
50	chr11	3634835	3980746	345911	chr11	3876932	4114440	237508	NM_001277962	STIM1
50	chr11	3634835	3980746	345911	chr11	3876932	4114440	237508	NM_001277961	STIM1
50	chr11	3634835	3980746	345911	chr11	3877291	3877371	80	NR_039835	MIR4687
51	chr11	4089631	4470615	380984	chr11	4115923	4160106	44183	NM_001033	RRM1
51	chr11	4089631	4470615	380984	chr11	3876932	4114440	237508	NM_003156	STIM1
51	chr11	4089631	4470615	380984	chr11	3876932	4114440	237508	NM_001277962	STIM1
51	chr11	4089631	4470615	380984	chr11	3876932	4114440	237508	NM_001277961	STIM1
51	chr11	4089631	4470615	380984	chr11	4406126	4414926	8800	NM_003141	TRIM21
51	chr11	4089631	4470615	380984	chr11	4208381	4223883	15502	NR_047550	LOC100506082
51	chr11	4089631	4470615	380984	chr11	4388492	4389616	1124	NM_001005161	OR52B4
51	chr11	4089631	4470615	380984	chr11	4470524	4471591	1067	NM_001005172	OR52K2
52	chr11	4588031	4625919	37888	chr11	4608020	4609135	1115	NM_001005170	OR52I2
52	chr11	4588031	4625919	37888	chr11	4592652	4599050	6398	NM_144663	C11orf40
52	chr11	4588031	4625919	37888	chr11	4619901	4629489	9588	NM_018073	TRIM68
52	chr11	4588031	4625919	37888	chr11	4615268	4616243	975	NM_001005169	OR52I1
53	chr11	4631455	4669343	37888	chr11	4665155	4676716	11561	NM_152430	OR51E1
53	chr11	4631455	4669343	37888	chr11	4660944	4662068	1124	NM_001004751	OR51D1
54	chr11	4957347	4993184	35837	chr11	4967388	4968330	942	NM_001005329	OR51A4
54	chr11	4957347	4993184	35837	chr11	4976001	4976943	942	NM_001004748	OR51A2
55	chr11	5000771	5036608	35837	chr11	5009423	5013659	4236	NM_021801	MMP26
55	chr11	5000771	5036608	35837	chr11	5020212	5021160	948	NM_001004755	OR51L1
56	chr11	5148910	5187849	38939	chr11	5172660	5173599	939	NM_012375	OR52A1
56	chr11	5148910	5187849	38939	chr11	5152921	5153872	951	NM_001005160	OR52A5
57	chr11	5192334	5231273	38939	chr11	5220964	5221930	966	NM_001004760	OR51V1
58	chr11	20633102	21030981	397879	chr11	20691116	21597229	906113	NM_006157	NELL1
58	chr11	20633102	21030981	397879	chr11	20691116	21597229	906113	NM_201551	NELL1
58	chr11	20633102	21030981	397879	chr11	20620945	20676610	55665	NM_004211	SLC6A5
59	chr11	31357671	31875238	517567	chr11	31453948	31531169	77221	NM_144981	IMMP1L
59	chr11	31357671	31875238	517567	chr11	31284170	31391357	107187	NM_181807	DCDC1
59	chr11	31357671	31875238	517567	chr11	31391376	31454382	63006	NM_181706	DNAJC24
59	chr11	31357671	31875238	517567	chr11	31838113	31908587	70474	NR_033971	DKFZp686K1684
59	chr11	31357671	31875238	517567	chr11	31806339	31832901	26562	NM_001604	PAX6
59	chr11	31357671	31875238	517567	chr11	31531296	31805329	274033	NM_019040	ELP4
59	chr11	31357671	31875238	517567	chr11	31806339	31839509	33170	NM_001258462	PAX6
59	chr11	31357671	31875238	517567	chr11	31806339	31832901	26562	NM_001258464	PAX6
59	chr11	31357671	31875238	517567	chr11	31806339	31833731	27392	NM_001258463	PAX6
59	chr11	31357671	31875238	517567	chr11	31806339	31839509	33170	NM_001127612	PAX6
59	chr11	31357671	31875238	517567	chr11	31806339	31832690	26351	NM_001258465	PAX6
59	chr11	31357671	31875238	517567	chr11	31806339	31832901	26562	NM_000280	PAX6
60	chr11	32999731	33439216	439485	chr11	33162976	33183037	20061	NM_001033505	CSTF3
60	chr11	32999731	33439216	439485	chr11	32914791	33001814	87023	NM_001076786	QSER1
60	chr11	32999731	33439216	439485	chr11	33106129	33183037	76908	NM_001326	CSTF3
60	chr11	32999731	33439216	439485	chr11	33037727	33055128	17401	NM_139160	DEPDC7
60	chr11	32999731	33439216	439485	chr11	33037409	33055128	17719	NM_001077242	DEPDC7
60	chr11	32999731	33439216	439485	chr11	33097695	33101000	3305	NR_015451	LINC00294
60	chr11	32999731	33439216	439485	chr11	33061560	33095109	33549	NM_001145541	TCP11L1
60	chr11	32999731	33439216	439485	chr11	33060962	33095109	34147	NM_018393	TCP11L1
60	chr11	32999731	33439216	439485	chr11	33278867	33378568	99701	NM_001048200	HIPK3
60	chr11	32999731	33439216	439485	chr11	33278867	33378568	99701	NM_005734	HIPK3
60	chr11	32999731	33439216	439485	chr11	33162976	33183037	20061	NM_001033506	CSTF3
60	chr11	32999731	33439216	439485	chr11	33183202	33213142	29940	NR_034027	CSTF3-AS1
60	chr11	32999731	33439216	439485	chr11	33278217	33378568	100351	NM_001278163	HIPK3
60	chr11	32999731	33439216	439485	chr11	33279876	33378568	98692	NM_001278162	HIPK3
61	chr11	40500041	40542841	42800	chr11	40135750	41481186	1345436	NM_001258419	LRRC4C
61	chr11	40500041	40542841	42800	chr11	40135750	41481186	1345436	NM_020929	LRRC4C
62	chr11	40543465	40586265	42800	chr11	40135750	41481186	1345436	NM_001258419	LRRC4C
62	chr11	40543465	40586265	42800	chr11	40135750	41481186	1345436	NM_020929	LRRC4C
63	chr11	61006109	61639099	632990	chr11	61582632	61582712	80	NR_031729	MIR1908
63	chr11	61006109	61639099	632990	chr11	61197596	61214239	16643	NM_017841	SDHAF2
63	chr11	61006109	61639099	632990	chr11	61066918	61100684	33766	NM_001923	DDB1
63	chr11	61006109	61639099	632990	chr11	61008643	61018929	10286	NM_014224	PGA5
63	chr11	61006109	61639099	632990	chr11	61025757	61062788	37031	NM_152718	VWCE
63	chr11	61006109	61639099	632990	chr11	61129472	61136975	7503	NM_016464	TMEM138
63	chr11	61006109	61639099	632990	chr11	61100653	61116231	15578	NM_015533	DAK
63	chr11	61006109	61639099	632990	chr11	61116219	61129755	13536	NM_001161454	CYB561A3
63	chr11	61006109	61639099	632990	chr11	61116219	61129755	13536	NM_153611	CYB561A3
63	chr11	61006109	61639099	632990	chr11	61116219	61124361	8142	NM_001161452	CYB561A3
63	chr11	61006109	61639099	632990	chr11	61129472	61136975	7503	NR_028473	TMEM138
63	chr11	61006109	61639099	632990	chr11	61159831	61166335	6504	NM_001173990	TMEM216
63	chr11	61006109	61639099	632990	chr11	61170119	61197464	27345	NM_001136040	CPSF7
63	chr11	61006109	61639099	632990	chr11	61159864	61166335	6471	NM_016499	TMEM216
63	chr11	61006109	61639099	632990	chr11	61159831	61166335	6504	NM_001173991	TMEM216
63	chr11	61006109	61639099	632990	chr11	61170119	61197383	27264	NM_024811	CPSF7
63	chr11	61006109	61639099	632990	chr11	61170119	61197464	27345	NM_001142565	CPSF7
63	chr11	61006109	61639099	632990	chr11	61281187	61348344	67157	NM_001252065	SYT7
63	chr11	61006109	61639099	632990	chr11	61276271	61278490	2219	NM_001145077	LRRC10B
63	chr11	61006109	61639099	632990	chr11	61248584	61258400	9816	NM_001170753	PPP1R32
63	chr11	61006109	61639099	632990	chr11	61248584	61258400	9816	NM_145017	PPP1R32
63	chr11	61006109	61639099	632990	chr11	61276067	61276129	62	NR_039708	MIR4488
63	chr11	61006109	61639099	632990	chr11	61281187	61348344	67157	NM_004200	SYT7
63	chr11	61006109	61639099	632990	chr11	61559966	61560033	67	NR_030342	MIR611
63	chr11	61006109	61639099	632990	chr11	61447904	61514474	66570	NM_006133	DAGLA
63	chr11	61006109	61639099	632990	chr11	61382507	61406921	24414	NR_002775	RPLP0P2
63	chr11	61006109	61639099	632990	chr11	61522860	61555989	33129	NM_013279	MYRF
63	chr11	61006109	61639099	632990	chr11	61520120	61555989	35869	NM_001127392	MYRF
63	chr11	61006109	61639099	632990	chr11	61521500	61525136	3636	NR_026882	DKFZP434K028
63	chr11	61006109	61639099	632990	chr11	61556601	61560085	3484	NM_014206	TMEM258
63	chr11	61006109	61639099	632990	chr11	61560108	61564714	4606	NM_004111	FEN1
63	chr11	61006109	61639099	632990	chr11	61567096	61584529	17433	NM_013402	FADS1
63	chr11	61006109	61639099	632990	chr11	61595712	61634825	39113	NM_004265	FADS2
64	chr11	63755201	63772410	17209	chr11	63753324	63765892	12568	NR_003089	OTUB1
64	chr11	63755201	63772410	17209	chr11	63766029	63933585	167556	NM_014067	MACROD1
64	chr11	63755201	63772410	17209	chr11	63753324	63765892	12568	NM_017670	OTUB1
65	chr11	63998625	64015834	17209	chr11	64008603	64011607	3004	NM_001135208	FKBP2
65	chr11	63998625	64015834	17209	chr11	64002055	64006736	4681	NM_001243733	VEGFB
65	chr11	63998625	64015834	17209	chr11	63997752	64001753	4001	NM_005528	DNAJC4
65	chr11	63998625	64015834	17209	chr11	64002055	64006736	4681	NM_003377	VEGFB
65	chr11	63998625	64015834	17209	chr11	64008412	64011607	3195	NM_004470	FKBP2
65	chr11	63998625	64015834	17209	chr11	64009587	64011607	2020	NM_057092	FKBP2
65	chr11	63998625	64015834	17209	chr11	64011950	64014413	2463	NM_138689	PPP1R14B
66	chr11	64899355	65429352	529997	chr11	65421066	65430443	9377	NM_021975	RELA
66	chr11	64899355	65429352	529997	chr11	64894750	64902003	7253	NM_172230	SYVN1
66	chr11	64899355	65429352	529997	chr11	64894750	64902003	7253	NM_032431	SYVN1
66	chr11	64899355	65429352	529997	chr11	64949303	64979477	30174	NM_005186	CAPN1
66	chr11	64899355	65429352	529997	chr11	64937706	64940688	2982	NM_001008778	SPDYC
66	chr11	64899355	65429352	529997	chr11	64948685	64979477	30792	NM_001198868	CAPN1
66	chr11	64899355	65429352	529997	chr11	64949149	64979477	30328	NM_001198869	CAPN1
66	chr11	64899355	65429352	529997	chr11	64949303	64979477	30174	NR_040008	CAPN1
66	chr11	64899355	65429352	529997	chr11	65029431	65065088	35657	NM_002689	POLA2
66	chr11	64899355	65429352	529997	chr11	64981310	65010228	28918	NR_033396	SLC22A20
66	chr11	64899355	65429352	529997	chr11	64981310	64993511	12201	NM_001004326	SLC22A20
66	chr11	64899355	65429352	529997	chr11	65339819	65341669	1850	NM_001098785	FAM89B
66	chr11	64899355	65429352	529997	chr11	65292547	65306182	13635	NM_001048218	SCYL1
66	chr11	64899355	65429352	529997	chr11	65142662	65151172	8510	NM_001278251	SLC25A45
66	chr11	64899355	65429352	529997	chr11	65101224	65120451	19227	NM_006268	DPF2
66	chr11	64899355	65429352	529997	chr11	65082288	65089900	7612	NM_006779	CDC42EP2
66	chr11	64899355	65429352	529997	chr11	65142662	65150142	7480	NM_001077241	SLC25A45
66	chr11	64899355	65429352	529997	chr11	65122281	65125082	2801	NM_145719	TIGD3
66	chr11	64899355	65429352	529997	chr11	65211928	65212028	100	NR_030343	MIR612
66	chr11	64899355	65429352	529997	chr11	65154040	65180995	26955	NM_031904	FRMD8
66	chr11	64899355	65429352	529997	chr11	65142662	65150142	7480	NM_182556	SLC25A45
66	chr11	64899355	65429352	529997	chr11	65142662	65149857	7195	NM_001278250	SLC25A45
66	chr11	64899355	65429352	529997	chr11	65190268	65194003	3735	NR_028272	NEAT1
66	chr11	64899355	65429352	529997	chr11	65265232	65273939	8707	NR_002819	MALAT1
66	chr11	64899355	65429352	529997	chr11	65282807	65282828	21	NR_049839	MIR548AR
66	chr11	64899355	65429352	529997	chr11	65292547	65306182	13635	NM_020680	SCYL1
66	chr11	64899355	65429352	529997	chr11	65339819	65341669	1850	NM_001098784	FAM89B
66	chr11	64899355	65429352	529997	chr11	65306029	65325699	19670	NM_001164266	LTBP3
66	chr11	64899355	65429352	529997	chr11	65306029	65325699	19670	NM_021070	LTBP3
66	chr11	64899355	65429352	529997	chr11	65306029	65325699	19670	NM_001130144	LTBP3
66	chr11	64899355	65429352	529997	chr11	65337942	65339239	1297	NM_006396	SSSCA1
66	chr11	64899355	65429352	529997	chr11	65336690	65337884	1194	NR_038923	LOC254100
66	chr11	64899355	65429352	529997	chr11	65339819	65341669	1850	NM_152832	FAM89B
66	chr11	64899355	65429352	529997	chr11	65403780	65403840	60	NR_039839	MIR4690
66	chr11	64899355	65429352	529997	chr11	65360325	65363467	3142	NM_033455	KCNK7
66	chr11	64899355	65429352	529997	chr11	65343508	65360116	16608	NM_001099409	EHBP1L1
66	chr11	64899355	65429352	529997	chr11	65360325	65363467	3142	NM_033347	KCNK7
66	chr11	64899355	65429352	529997	chr11	65360325	65363467	3142	NM_033348	KCNK7
66	chr11	64899355	65429352	529997	chr11	65360325	65363467	3142	NM_005714	KCNK7
66	chr11	64899355	65429352	529997	chr11	65365225	65381720	16495	NM_002419	MAP3K11
66	chr11	64899355	65429352	529997	chr11	65383782	65404910	21128	NM_032223	PCNXL3
66	chr11	64899355	65429352	529997	chr11	65405577	65418391	12814	NM_006747	SIPA1
66	chr11	64899355	65429352	529997	chr11	65416662	65416724	62	NR_039709	MIR4489
66	chr11	64899355	65429352	529997	chr11	65407591	65418391	10800	NM_153253	SIPA1
66	chr11	64899355	65429352	529997	chr11	65421066	65430443	9377	NM_001243984	RELA
66	chr11	64899355	65429352	529997	chr11	65421066	65430443	9377	NM_001145138	RELA
66	chr11	64899355	65429352	529997	chr11	65421066	65430443	9377	NM_001243985	RELA
67	chr11	67103389	67828351	724962	chr11	67259238	67272843	13605	NM_004910	PITPNM1
67	chr11	67103389	67828351	724962	chr11	67205517	67210983	5466	NM_020441	CORO1B
67	chr11	67103389	67828351	724962	chr11	67183148	67193078	9930	NM_001166222	CARNS1
67	chr11	67103389	67828351	724962	chr11	67085309	67159158	73849	NR_024469	LOC100130987
67	chr11	67103389	67828351	724962	chr11	67159422	67165883	6461	NM_004584	RAD9A
67	chr11	67103389	67828351	724962	chr11	67118235	67121067	2832	NR_046413	POLD4
67	chr11	67103389	67828351	724962	chr11	67118235	67121067	2832	NR_046412	POLD4
67	chr11	67103389	67828351	724962	chr11	67118235	67121067	2832	NR_046411	POLD4
67	chr11	67103389	67828351	724962	chr11	67118235	67121067	2832	NM_001256870	POLD4
67	chr11	67103389	67828351	724962	chr11	67118235	67121067	2832	NM_021173	POLD4
67	chr11	67103389	67828351	724962	chr11	67131638	67141206	9568	NM_013246	CLCF1
67	chr11	67103389	67828351	724962	chr11	67131638	67141648	10010	NM_001166212	CLCF1
67	chr11	67103389	67828351	724962	chr11	67165651	67169376	3725	NM_206873	PPP1CA
67	chr11	67103389	67828351	724962	chr11	67165651	67169376	3725	NM_001008709	PPP1CA
67	chr11	67103389	67828351	724962	chr11	67165651	67169376	3725	NM_002708	PPP1CA
67	chr11	67103389	67828351	724962	chr11	67160775	67165883	5108	NM_001243224	RAD9A
67	chr11	67103389	67828351	724962	chr11	67171383	67177561	6178	NM_198517	TBC1D10C
67	chr11	67103389	67828351	724962	chr11	67171383	67177561	6178	NM_001256508	TBC1D10C
67	chr11	67103389	67828351	724962	chr11	67171446	67177561	6115	NR_046266	TBC1D10C
67	chr11	67103389	67828351	724962	chr11	67183148	67193078	9930	NM_020811	CARNS1
67	chr11	67103389	67828351	724962	chr11	67195934	67202879	6945	NM_003952	RPS6KB2
67	chr11	67103389	67828351	724962	chr11	67202980	67205153	2173	NM_005608	PTPRCAP
67	chr11	67103389	67828351	724962	chr11	67205517	67211292	5775	NM_001018070	CORO1B
67	chr11	67103389	67828351	724962	chr11	67231818	67236748	4930	NM_001078650	TMEM134
67	chr11	67103389	67828351	724962	chr11	67231818	67236748	4930	NR_073412	TMEM134
67	chr11	67103389	67828351	724962	chr11	67231818	67236748	4930	NR_073411	TMEM134
67	chr11	67103389	67828351	724962	chr11	67231818	67236748	4930	NR_073410	TMEM134
67	chr11	67103389	67828351	724962	chr11	67231818	67236748	4930	NR_073409	TMEM134
67	chr11	67103389	67828351	724962	chr11	67218771	67220200	1429	NM_206997	GPR152
67	chr11	67103389	67828351	724962	chr11	67231818	67236748	4930	NM_025124	TMEM134
67	chr11	67103389	67828351	724962	chr11	67231818	67236748	4930	NM_001078651	TMEM134
67	chr11	67103389	67828351	724962	chr11	67222817	67229245	6428	NM_145200	CABP4
67	chr11	67103389	67828351	724962	chr11	67231818	67236748	4930	NR_073413	TMEM134
67	chr11	67103389	67828351	724962	chr11	67250504	67258579	8075	NM_003977	AIP
67	chr11	67103389	67828351	724962	chr11	67820325	67888858	68533	NM_212469	CHKA
67	chr11	67103389	67828351	724962	chr11	67398773	67407031	8258	NM_005995	TBX10
67	chr11	67103389	67828351	724962	chr11	67374322	67380012	5690	NM_001166102	NDUFV1
67	chr11	67103389	67828351	724962	chr11	67286417	67290899	4482	NM_016366	CABP2
67	chr11	67103389	67828351	724962	chr11	67259238	67272843	13605	NM_001130848	PITPNM1
67	chr11	67103389	67828351	724962	chr11	67273960	67275658	1698	NM_001271849	CDK2AP2
67	chr11	67103389	67828351	724962	chr11	67273960	67276199	2239	NM_005851	CDK2AP2
67	chr11	67103389	67828351	724962	chr11	67273960	67275658	1698	NR_073484	CDK2AP2
67	chr11	67103389	67828351	724962	chr11	67374322	67380012	5690	NM_007103	NDUFV1
67	chr11	67103389	67828351	724962	chr11	67351065	67354124	3059	NM_000852	GSTP1
67	chr11	67103389	67828351	724962	chr11	67395408	67397408	2000	NM_181843	NUDT8
67	chr11	67103389	67828351	724962	chr11	67380994	67383135	2141	NR_033791	DOC2GP
67	chr11	67103389	67828351	724962	chr11	67395409	67397408	1999	NM_001243750	NUDT8
67	chr11	67103389	67828351	724962	chr11	67806461	67818366	11905	NM_006019	TCIRG1
67	chr11	67103389	67828351	724962	chr11	67798083	67804114	6031	NM_002496	NDUFS8
67	chr11	67103389	67828351	724962	chr11	67429632	67442102	12470	NM_000695	ALDH3B2
67	chr11	67103389	67828351	724962	chr11	67429632	67448685	19053	NM_001031615	ALDH3B2
67	chr11	67103389	67828351	724962	chr11	67410025	67418130	8105	NM_080658	ACY3
67	chr11	67103389	67828351	724962	chr11	67777789	67796743	18954	NM_001030010	ALDH3B1
67	chr11	67103389	67828351	724962	chr11	67758574	67771593	13019	NM_030930	UNC93B1
67	chr11	67103389	67828351	724962	chr11	67559237	67572807	13570	NR_024249	FAM86C2P
67	chr11	67103389	67828351	724962	chr11	67776047	67796743	20696	NM_001161473	ALDH3B1
67	chr11	67103389	67828351	724962	chr11	67777789	67796743	18954	NM_000694	ALDH3B1
67	chr11	67103389	67828351	724962	chr11	67801363	67801448	85	NR_039840	MIR4691
67	chr11	67103389	67828351	724962	chr11	67820325	67888858	68533	NM_001277	CHKA
67	chr11	67103389	67828351	724962	chr11	67810446	67818366	7920	NM_006053	TCIRG1
68	chr11	67859906	67995818	135912	chr11	67820325	67888858	68533	NM_212469	CHKA
68	chr11	67859906	67995818	135912	chr11	67820325	67888858	68533	NM_001277	CHKA
68	chr11	67859906	67995818	135912	chr11	67923506	67980784	57278	NM_017635	SUV420H1
68	chr11	67859906	67995818	135912	chr11	67933185	67980784	47599	NM_016028	SUV420H1
69	chr11	68103330	68239242	135912	chr11	68228185	68382801	154616	NM_018312	PPP6R3
69	chr11	68103330	68239242	135912	chr11	68080107	68216743	136636	NM_002335	LRP5
69	chr11	68103330	68239242	135912	chr11	68228185	68382801	154616	NM_001164164	PPP6R3
69	chr11	68103330	68239242	135912	chr11	68228185	68382801	154616	NM_001164160	PPP6R3
69	chr11	68103330	68239242	135912	chr11	68228185	68382801	154616	NM_001164162	PPP6R3
69	chr11	68103330	68239242	135912	chr11	68228185	68382801	154616	NM_001164163	PPP6R3
69	chr11	68103330	68239242	135912	chr11	68228185	68382801	154616	NM_001164161	PPP6R3
70	chr11	77255032	77544034	289002	chr11	77532207	77583398	51191	NM_024684	AAMDC
70	chr11	77255032	77544034	289002	chr11	77327195	77348851	21656	NM_001293	CLNS1A
70	chr11	77255032	77544034	289002	chr11	77300679	77321401	20722	NM_173039	AQP11
70	chr11	77255032	77544034	289002	chr11	77377273	77531880	154607	NM_016578	RSF1
71	chr11	77577384	77866386	289002	chr11	77589765	77705717	115952	NM_033547	INTS4
71	chr11	77577384	77866386	289002	chr11	77532207	77583398	51191	NM_024684	AAMDC
71	chr11	77577384	77866386	289002	chr11	77779392	77791265	11873	NM_004549	NDUFC2
71	chr11	77577384	77866386	289002	chr11	77764353	77830821	66468	NR_046948	RNU6-83P
71	chr11	77577384	77866386	289002	chr11	77726760	77791265	64505	NM_001203262	NDUFC2-KCTD14
71	chr11	77577384	77866386	289002	chr11	77726760	77791265	64505	NM_001203261	NDUFC2-KCTD14
71	chr11	77577384	77866386	289002	chr11	77726760	77791265	64505	NM_001203260	NDUFC2-KCTD14
71	chr11	77577384	77866386	289002	chr11	77726760	77734320	7560	NM_023930	KCTD14
71	chr11	77577384	77866386	289002	chr11	77774906	77779403	4497	NM_003251	THRSP
71	chr11	77577384	77866386	289002	chr11	77779392	77791265	11873	NM_001204054	NDUFC2
71	chr11	77577384	77866386	289002	chr11	77850838	77885023	34185	NR_102280	LOC100289388
71	chr11	77577384	77866386	289002	chr11	77850838	77885023	34185	NR_102281	LOC100289388
71	chr11	77577384	77866386	289002	chr11	77779392	77791265	11873	NM_001204055	NDUFC2
71	chr11	77577384	77866386	289002	chr11	77811987	77850699	38712	NM_001007027	ALG8
71	chr11	77577384	77866386	289002	chr11	77811987	77850699	38712	NM_024079	ALG8
72	chr11	81487759	82234704	746945	chr11	81601782	81601878	96	NR_036186	MIR4300
73	chr11	85114803	85146493	31690	chr11	83166055	85338314	2172259	NM_001142699	DLG2
74	chr11	85437155	85468845	31690	chr11	85405264	85437511	32247	NM_206928	SYTL2
74	chr11	85437155	85468845	31690	chr11	85405264	85437511	32247	NM_206927	SYTL2
74	chr11	85437155	85468845	31690	chr11	85405264	85469044	63780	NM_001162953	SYTL2
74	chr11	85437155	85468845	31690	chr11	85405264	85469044	63780	NM_001162951	SYTL2
74	chr11	85437155	85468845	31690	chr11	85405264	85522178	116914	NM_032943	SYTL2
75	chr11	87920222	89273516	1353294	chr11	88237743	88781240	543497	NM_001143831	GRM5
75	chr11	87920222	89273516	1353294	chr11	88053980	88070941	16961	NM_001114173	CTSC
75	chr11	87920222	89273516	1353294	chr11	88026759	88070941	44182	NM_001814	CTSC
75	chr11	87920222	89273516	1353294	chr11	88237743	88257222	19479	NR_049724	GRM5-AS1
75	chr11	87920222	89273516	1353294	chr11	88053980	88070941	16961	NM_148170	CTSC
75	chr11	87920222	89273516	1353294	chr11	89057521	89224653	167132	NR_026571	NOX4
75	chr11	87920222	89273516	1353294	chr11	89057521	89224653	167132	NM_001143836	NOX4
75	chr11	87920222	89273516	1353294	chr11	89057521	89224653	167132	NM_016931	NOX4
75	chr11	87920222	89273516	1353294	chr11	89057521	89322779	265258	NM_001143837	NOX4
75	chr11	87920222	89273516	1353294	chr11	88911039	89028927	117888	NM_000372	TYR
75	chr11	87920222	89273516	1353294	chr11	88237743	88796816	559073	NM_000842	GRM5
76	chr11	98309727	99952548	1642821	chr11	99426875	100229616	802741	NM_175566	CNTN5
76	chr11	98309727	99952548	1642821	chr11	98891705	100229616	1337911	NM_001243270	CNTN5
76	chr11	98309727	99952548	1642821	chr11	98891705	100229616	1337911	NM_014361	CNTN5
76	chr11	98309727	99952548	1642821	chr11	98891705	100180433	1288728	NM_001243271	CNTN5
77	chr11	103369976	106913694	3543718	chr11	105480799	105784231	303432	NM_001077244	GRIA4
77	chr11	103369976	106913694	3543718	chr11	104813593	104827422	13829	NM_033306	CASP4
77	chr11	103369976	106913694	3543718	chr11	104757417	104769397	11980	NR_034071	CASP12
77	chr11	103369976	106913694	3543718	chr11	104757417	104769397	11980	NR_034061	CASP12
77	chr11	103369976	106913694	3543718	chr11	103907307	103909922	2615	NM_001001711	DDI1
77	chr11	103369976	106913694	3543718	chr11	103777913	104035027	257114	NM_025208	PDGFD
77	chr11	103369976	106913694	3543718	chr11	103777913	104035027	257114	NM_033135	PDGFD
77	chr11	103369976	106913694	3543718	chr11	103720633	103720708	75	NR_039842	MIR4693
77	chr11	103369976	106913694	3543718	chr11	104757417	104769397	11980	NR_034068	CASP12
77	chr11	103369976	106913694	3543718	chr11	104757417	104769397	11980	NR_034067	CASP12
77	chr11	103369976	106913694	3543718	chr11	104757417	104769397	11980	NR_034066	CASP12
77	chr11	103369976	106913694	3543718	chr11	104756444	104769397	12953	NM_001191016	CASP12
77	chr11	103369976	106913694	3543718	chr11	104757417	104769397	11980	NR_034070	CASP12
77	chr11	103369976	106913694	3543718	chr11	104757417	104769397	11980	NR_034063	CASP12
77	chr11	103369976	106913694	3543718	chr11	104757417	104769397	11980	NR_034064	CASP12
77	chr11	103369976	106913694	3543718	chr11	104757417	104769397	11980	NR_034065	CASP12
77	chr11	103369976	106913694	3543718	chr11	104772275	104788902	16627	NR_034079	LOC643733
77	chr11	103369976	106913694	3543718	chr11	104772275	104788902	16627	NR_034078	LOC643733
77	chr11	103369976	106913694	3543718	chr11	104896236	104905884	9648	NM_001257118	CASP1
77	chr11	103369976	106913694	3543718	chr11	104896236	104905884	9648	NM_001257119	CASP1
77	chr11	103369976	106913694	3543718	chr11	104896236	104905884	9648	NM_033292	CASP1
77	chr11	103369976	106913694	3543718	chr11	104813593	104839325	25732	NM_001225	CASP4
77	chr11	103369976	106913694	3543718	chr11	104864966	104893895	28929	NR_024239	CASP5
77	chr11	103369976	106913694	3543718	chr11	104864966	104893895	28929	NM_001136109	CASP5
77	chr11	103369976	106913694	3543718	chr11	104864966	104893895	28929	NM_001136112	CASP5
77	chr11	103369976	106913694	3543718	chr11	104864966	104893895	28929	NM_001136110	CASP5
77	chr11	103369976	106913694	3543718	chr11	104864966	104893895	28929	NM_004347	CASP5
77	chr11	103369976	106913694	3543718	chr11	104864966	104893895	28929	NR_036562	CASP5
77	chr11	103369976	106913694	3543718	chr11	104896236	104905884	9648	NM_033293	CASP1
77	chr11	103369976	106913694	3543718	chr11	104896236	104905884	9648	NM_033295	CASP1
77	chr11	103369976	106913694	3543718	chr11	104896236	104905884	9648	NM_033294	CASP1
77	chr11	103369976	106913694	3543718	chr11	104896236	104905884	9648	NM_001223	CASP1
77	chr11	103369976	106913694	3543718	chr11	104963195	104972158	8963	NM_001007232	CARD17
77	chr11	103369976	106913694	3543718	chr11	104912052	104916051	3999	NM_052889	CARD16
77	chr11	103369976	106913694	3543718	chr11	104912052	104916051	3999	NM_001017534	CARD16
77	chr11	103369976	106913694	3543718	chr11	105008447	105010461	2014	NM_021571	CARD18
77	chr11	103369976	106913694	3543718	chr11	105480799	105852819	372020	NM_001077243	GRIA4
77	chr11	103369976	106913694	3543718	chr11	106544737	106889171	344434	NM_001256424	GUCY1A2
77	chr11	103369976	106913694	3543718	chr11	105481410	105852819	371409	NR_046356	GRIA4
77	chr11	103369976	106913694	3543718	chr11	105480799	105852819	372020	NM_000829	GRIA4
77	chr11	103369976	106913694	3543718	chr11	105878628	105892954	14326	NM_032424	MSANTD4
77	chr11	103369976	106913694	3543718	chr11	105481410	105784231	302821	NM_001112812	GRIA4
77	chr11	103369976	106913694	3543718	chr11	105948291	105969419	21128	NM_015423	AASDHPPT
77	chr11	103369976	106913694	3543718	chr11	105921824	105948465	26641	NM_198439	KBTBD3
77	chr11	103369976	106913694	3543718	chr11	105921824	105948465	26641	NM_152433	KBTBD3
77	chr11	103369976	106913694	3543718	chr11	106544737	106889171	344434	NM_000855	GUCY1A2
78	chr11	128324554	128393163	68609	chr11	128328655	128457453	128798	NM_001143820	ETS1
78	chr11	128324554	128393163	68609	chr11	128328655	128392205	63550	NM_005238	ETS1
78	chr11	128324554	128393163	68609	chr11	128328655	128392205	63550	NM_001162422	ETS1
79	chr11	132338283	132783066	444783	chr11	132284874	132813037	528163	NM_002545	OPCML
79	chr11	132338283	132783066	444783	chr11	132284874	133402403	1117529	NM_001012393	OPCML
80	chr11	132833073	133277856	444783	chr11	132284874	133402403	1117529	NM_001012393	OPCML
81	chr11	133674731	134720345	1045614	chr11	134146274	134189458	43184	NM_001080407	GLB1L3
81	chr11	133674731	134720345	1045614	chr11	133710516	133715392	4876	NM_174927	SPATA19
81	chr11	133674731	134720345	1045614	chr11	134094560	134117686	23126	NM_052875	VPS26B
81	chr11	133674731	134720345	1045614	chr11	133768398	133768476	78	NR_039846	MIR4697
81	chr11	133674731	134720345	1045614	chr11	133766329	133771635	5306	NR_024344	LOC283174
81	chr11	133674731	134720345	1045614	chr11	133938819	134021652	82833	NM_001205329	JAM3
81	chr11	133674731	134720345	1045614	chr11	133938819	134021652	82833	NM_032801	JAM3
81	chr11	133674731	134720345	1045614	chr11	133778519	133826649	48130	NM_001277285	IGSF9B
81	chr11	133674731	134720345	1045614	chr11	133902166	133911236	9070	NR_027276	LOC100128239
81	chr11	133674731	134720345	1045614	chr11	134022336	134094426	72090	NM_015261	NCAPD3
81	chr11	133674731	134720345	1045614	chr11	134123433	134135746	12313	NM_014384	ACAD8
81	chr11	133674731	134720345	1045614	chr11	134118172	134123260	5088	NM_001037304	THYN1
81	chr11	133674731	134720345	1045614	chr11	134118172	134123260	5088	NM_199297	THYN1
81	chr11	133674731	134720345	1045614	chr11	134118172	134123260	5088	NM_199298	THYN1
81	chr11	133674731	134720345	1045614	chr11	134118172	134123260	5088	NM_014174	THYN1
81	chr11	133674731	134720345	1045614	chr11	134118172	134123260	5088	NM_001037305	THYN1
81	chr11	133674731	134720345	1045614	chr11	134201767	134246218	44451	NM_138342	GLB1L2
81	chr11	133674731	134720345	1045614	chr11	134306375	134375555	69180	NR_033852	LOC283177
81	chr11	133674731	134720345	1045614	chr11	134248397	134281812	33415	NM_054025	B3GAT1
81	chr11	133674731	134720345	1045614	chr11	134248397	134281812	33415	NM_018644	B3GAT1
82	chr10	409265	647337	238072	chr10	320129	735608	415479	NM_014974	DIP2C
83	chr10	1204215	2373354	1169139	chr10	1205707	1210612	4905	NR_015376	LINC00200
83	chr10	1204215	2373354	1169139	chr10	2047666	2056542	8876	NR_040253	LINC00700
83	chr10	1204215	2373354	1169139	chr10	1223252	1779670	556418	NM_018702	ADARB2
83	chr10	1204215	2373354	1169139	chr10	1568824	1599179	30355	NR_033387	ADARB2-AS1
83	chr10	1204215	2373354	1169139	chr10	2342512	2357268	14756	NR_038884	LINC00701
84	chr10	2685191	3124260	439069	chr10	3109711	3178997	69286	NM_002627	PFKP
84	chr10	2685191	3124260	439069	chr10	3110818	3178997	68179	NM_001242339	PFKP
85	chr10	4862814	5261482	398668	chr10	4868368	4890251	21883	NM_001271025	AKR1E2
85	chr10	4862814	5261482	398668	chr10	4868368	4890251	21883	NM_001271021	AKR1E2
85	chr10	4862814	5261482	398668	chr10	4868368	4890251	21883	NR_073127	AKR1E2
85	chr10	4862814	5261482	398668	chr10	4868368	4890251	21883	NR_073126	AKR1E2
85	chr10	4862814	5261482	398668	chr10	4868368	4890251	21883	NR_073125	AKR1E2
85	chr10	4862814	5261482	398668	chr10	4868368	4890251	21883	NM_001040177	AKR1E2
85	chr10	4862814	5261482	398668	chr10	5029967	5060225	30258	NM_205845	AKR1C2
85	chr10	4862814	5261482	398668	chr10	4913858	4958465	44607	NR_026743	AKR1C6P
85	chr10	4862814	5261482	398668	chr10	5005453	5020158	14705	NM_001353	AKR1C1
85	chr10	4862814	5261482	398668	chr10	5238797	5260910	22113	NM_001818	AKR1C4
85	chr10	4862814	5261482	398668	chr10	5090957	5149878	58921	NM_001253908	AKR1C3
85	chr10	4862814	5261482	398668	chr10	5029967	5060225	30258	NM_001354	AKR1C2
85	chr10	4862814	5261482	398668	chr10	5042102	5046206	4104	NM_001135241	AKR1C2
85	chr10	4862814	5261482	398668	chr10	5196654	5227150	30496	NR_027916	AKR1CL1
85	chr10	4862814	5261482	398668	chr10	5136567	5149878	13311	NM_003739	AKR1C3
85	chr10	4862814	5261482	398668	chr10	5136567	5140368	3801	NM_001253909	AKR1C3
86	chr10	5657162	5751014	93852	chr10	5680819	5708558	27739	NM_024701	ASB13
86	chr10	5657162	5751014	93852	chr10	5726800	5805703	78903	NM_017782	FAM208B
86	chr10	5657162	5751014	93852	chr10	5680819	5708558	27739	NR_024581	ASB13
86	chr10	5657162	5751014	93852	chr10	5680819	5708558	27739	NR_037164	ASB13
87	chr10	11285065	11453047	167982	chr10	11047258	11378672	331414	NM_001025077	CELF2
87	chr10	11285065	11453047	167982	chr10	11206992	11378672	171680	NM_001025076	CELF2
87	chr10	11285065	11453047	167982	chr10	11059892	11378672	318780	NM_006561	CELF2
87	chr10	11285065	11453047	167982	chr10	11206992	11378672	171680	NM_001083591	CELF2
88	chr10	17338821	17372498	33677	chr10	17362675	17496254	133579	NM_001004470	ST8SIA6
89	chr10	19614765	20893196	1278431	chr10	20105371	20569115	463744	NM_032812	PLXDC2
89	chr10	19614765	20893196	1278431	chr10	20840898	20840975	77	NR_039822	MIR4675
90	chr10	22602134	33352828	10750694	chr10	26878793	26883251	4458	NR_026793	LINC00264
90	chr10	22602134	33352828	10750694	chr10	23481459	23483181	1722	NM_178161	PTF1A
90	chr10	22602134	33352828	10750694	chr10	23384426	23410942	26516	NM_012228	MSRB2
90	chr10	22602134	33352828	10750694	chr10	22634373	22706539	72166	NM_001253854	SPAG6
90	chr10	22602134	33352828	10750694	chr10	22634373	22706539	72166	NM_012443	SPAG6
90	chr10	22602134	33352828	10750694	chr10	22610138	22620414	10276	NM_005180	BMI1
90	chr10	22602134	33352828	10750694	chr10	22605311	22609246	3935	NM_012071	COMMD3
90	chr10	22602134	33352828	10750694	chr10	22605311	22620414	15103	NM_001204062	COMMD3-BMI1
90	chr10	22602134	33352828	10750694	chr10	22634373	22706539	72166	NM_172242	SPAG6
90	chr10	22602134	33352828	10750694	chr10	22724353	22726858	2505	NR_036533	LOC100499489
90	chr10	22602134	33352828	10750694	chr10	22634373	22706539	72166	NM_001253855	SPAG6
90	chr10	22602134	33352828	10750694	chr10	23216953	23326514	109561	NM_173081	ARMC3
90	chr10	22602134	33352828	10750694	chr10	22823765	23003503	179738	NM_005028	PIP4K2A
90	chr10	22602134	33352828	10750694	chr10	26223001	26501465	278464	NM_017433	MYO3A
90	chr10	22602134	33352828	10750694	chr10	23605519	23633772	28253	NM_153714	C10orf67
90	chr10	22602134	33352828	10750694	chr10	25305507	25315593	10086	NM_024838	THNSL1
90	chr10	22602134	33352828	10750694	chr10	25137553	25241533	103980	NM_020200	PRTFDC1
90	chr10	22602134	33352828	10750694	chr10	24497719	24836772	339053	NM_019590	KIAA1217
90	chr10	22602134	33352828	10750694	chr10	23983674	24836772	853098	NM_001098500	KIAA1217
90	chr10	22602134	33352828	10750694	chr10	23728197	23731310	3113	NM_001145373	OTUD1
90	chr10	22602134	33352828	10750694	chr10	24497719	24836772	339053	NM_001098501	KIAA1217
90	chr10	22602134	33352828	10750694	chr10	24872537	25012597	140060	NM_020824	ARHGAP21
90	chr10	22602134	33352828	10750694	chr10	24564613	24564710	97	NR_030334	MIR603
90	chr10	22602134	33352828	10750694	chr10	25270907	25305085	34178	NR_072993	ENKUR
90	chr10	22602134	33352828	10750694	chr10	25270907	25305085	34178	NR_072992	ENKUR
90	chr10	22602134	33352828	10750694	chr10	25270907	25305085	34178	NM_145010	ENKUR
90	chr10	22602134	33352828	10750694	chr10	25270907	25351208	80301	NM_001270383	ENKUR
90	chr10	22602134	33352828	10750694	chr10	25447000	25465205	18205	NR_027333	GPR158-AS1
90	chr10	22602134	33352828	10750694	chr10	25464289	25891157	426868	NM_020752	GPR158
90	chr10	22602134	33352828	10750694	chr10	26727265	26856732	129467	NM_019043	APBB1IP
90	chr10	22602134	33352828	10750694	chr10	26505235	26593491	88256	NM_000818	GAD2
90	chr10	22602134	33352828	10750694	chr10	26505235	26590048	84813	NM_001134366	GAD2
90	chr10	22602134	33352828	10750694	chr10	27484142	27531068	46926	NR_073195	ACBD5
90	chr10	22602134	33352828	10750694	chr10	27443752	27475848	32096	NM_001172303	MASTL
90	chr10	22602134	33352828	10750694	chr10	27035524	27150016	114492	NM_001178122	ABI1
90	chr10	22602134	33352828	10750694	chr10	27035524	27150016	114492	NM_001012751	ABI1
90	chr10	22602134	33352828	10750694	chr10	27035524	27150016	114492	NM_001178116	ABI1
90	chr10	22602134	33352828	10750694	chr10	26986594	27035726	49132	NM_014317	PDSS1
90	chr10	22602134	33352828	10750694	chr10	26932036	26942383	10347	NR_026794	LINC00202-2
90	chr10	22602134	33352828	10750694	chr10	27035524	27150016	114492	NM_001012750	ABI1
90	chr10	22602134	33352828	10750694	chr10	27443752	27475848	32096	NM_001172304	MASTL
90	chr10	22602134	33352828	10750694	chr10	27035524	27150016	114492	NM_001178125	ABI1
90	chr10	22602134	33352828	10750694	chr10	27035524	27150016	114492	NM_001178123	ABI1
90	chr10	22602134	33352828	10750694	chr10	27035524	27150016	114492	NM_001178124	ABI1
90	chr10	22602134	33352828	10750694	chr10	27035524	27150016	114492	NM_005470	ABI1
90	chr10	22602134	33352828	10750694	chr10	27035524	27150016	114492	NM_001178119	ABI1
90	chr10	22602134	33352828	10750694	chr10	27035524	27150016	114492	NM_001178120	ABI1
90	chr10	22602134	33352828	10750694	chr10	27035524	27150016	114492	NM_001178121	ABI1
90	chr10	22602134	33352828	10750694	chr10	27399039	27443349	44310	NM_001253866	YME1L1
90	chr10	22602134	33352828	10750694	chr10	27035524	27150016	114492	NM_001012752	ABI1
90	chr10	22602134	33352828	10750694	chr10	27399039	27443349	44310	NM_139312	YME1L1
90	chr10	22602134	33352828	10750694	chr10	27220134	27230930	10796	NR_026795	LINC00202-1
90	chr10	22602134	33352828	10750694	chr10	27293044	27389427	96383	NM_014915	ANKRD26
90	chr10	22602134	33352828	10750694	chr10	27293044	27389427	96383	NM_001256053	ANKRD26
90	chr10	22602134	33352828	10750694	chr10	27399039	27443349	44310	NM_014263	YME1L1
90	chr10	22602134	33352828	10750694	chr10	27484142	27529808	45666	NM_145698	ACBD5
90	chr10	22602134	33352828	10750694	chr10	27484142	27529808	45666	NM_001271512	ACBD5
90	chr10	22602134	33352828	10750694	chr10	27443752	27475848	32096	NM_032844	MASTL
90	chr10	22602134	33352828	10750694	chr10	27484142	27531068	46926	NR_024150	ACBD5
90	chr10	22602134	33352828	10750694	chr10	27484142	27531068	46926	NM_001042473	ACBD5
90	chr10	22602134	33352828	10750694	chr10	28835324	28835346	22	NR_049851	MIR5586
90	chr10	22602134	33352828	10750694	chr10	28822420	28912041	89621	NM_016628	WAC
90	chr10	22602134	33352828	10750694	chr10	27961802	28034778	72976	NM_173576	MKX
90	chr10	22602134	33352828	10750694	chr10	27534781	27541235	6454	NR_003525	LRRC37A6P
90	chr10	22602134	33352828	10750694	chr10	27484142	27529808	45666	NR_073197	ACBD5
90	chr10	22602134	33352828	10750694	chr10	27484142	27529808	45666	NR_073196	ACBD5
90	chr10	22602134	33352828	10750694	chr10	27793102	27831166	38064	NM_021252	RAB18
90	chr10	22602134	33352828	10750694	chr10	27793102	27831166	38064	NM_001256410	RAB18
90	chr10	22602134	33352828	10750694	chr10	27687116	27703297	16181	NM_001034842	PTCHD3
90	chr10	22602134	33352828	10750694	chr10	27793102	27831166	38064	NR_046172	RAB18
90	chr10	22602134	33352828	10750694	chr10	27793102	27831166	38064	NM_001256415	RAB18
90	chr10	22602134	33352828	10750694	chr10	27793102	27831166	38064	NM_001256412	RAB18
90	chr10	22602134	33352828	10750694	chr10	27793102	27831166	38064	NM_001256411	RAB18
90	chr10	22602134	33352828	10750694	chr10	28808845	28821283	12438	NR_033805	WAC-AS1
90	chr10	22602134	33352828	10750694	chr10	28101096	28287977	186881	NM_018076	ARMC4
90	chr10	22602134	33352828	10750694	chr10	27961802	28034778	72976	NM_001242702	MKX
90	chr10	22602134	33352828	10750694	chr10	28339922	28571067	231145	NM_173496	MPP7
90	chr10	22602134	33352828	10750694	chr10	28821421	28912041	90620	NR_024557	WAC
90	chr10	22602134	33352828	10750694	chr10	28822420	28912041	89621	NM_100486	WAC
90	chr10	22602134	33352828	10750694	chr10	31610063	31818742	208679	NM_001128128	ZEB1
90	chr10	22602134	33352828	10750694	chr10	30722949	30750762	27813	NM_001244134	MAP3K8
90	chr10	22602134	33352828	10750694	chr10	28966423	28971868	5445	NM_012342	BAMBI
90	chr10	22602134	33352828	10750694	chr10	29746276	29923901	177625	NM_021738	SVIL
90	chr10	22602134	33352828	10750694	chr10	29078239	29084979	6740	NR_038375	LINC00837
90	chr10	22602134	33352828	10750694	chr10	29078239	29084979	6740	NR_038374	LINC00837
90	chr10	22602134	33352828	10750694	chr10	29698500	29711299	12799	NR_003930	PTCHD3P1
90	chr10	22602134	33352828	10750694	chr10	29078239	29084979	6740	NR_038376	LINC00837
90	chr10	22602134	33352828	10750694	chr10	29577989	29600158	22169	NM_032517	LYZL1
90	chr10	22602134	33352828	10750694	chr10	29746276	30024730	278454	NM_003174	SVIL
90	chr10	22602134	33352828	10750694	chr10	30301728	30348488	46760	NM_020848	KIAA1462
90	chr10	22602134	33352828	10750694	chr10	29833932	29834026	94	NR_030335	MIR604
90	chr10	22602134	33352828	10750694	chr10	29891192	29891275	83	NR_030634	MIR938
90	chr10	22602134	33352828	10750694	chr10	30722949	30750762	27813	NM_005204	MAP3K8
90	chr10	22602134	33352828	10750694	chr10	30598729	30638267	39538	NM_018109	MTPAP
90	chr10	22602134	33352828	10750694	chr10	31133564	31320866	187302	NM_182755	ZNF438
90	chr10	22602134	33352828	10750694	chr10	31133564	31320866	187302	NM_001143768	ZNF438
90	chr10	22602134	33352828	10750694	chr10	30900707	30918647	17940	NM_183058	LYZL2
90	chr10	22602134	33352828	10750694	chr10	31133564	31320866	187302	NM_001143770	ZNF438
90	chr10	22602134	33352828	10750694	chr10	31133564	31288446	154882	NM_001143769	ZNF438
90	chr10	22602134	33352828	10750694	chr10	31133564	31320866	187302	NM_001143766	ZNF438
90	chr10	22602134	33352828	10750694	chr10	31133564	31320866	187302	NM_001143771	ZNF438
90	chr10	22602134	33352828	10750694	chr10	31133564	31320866	187302	NR_026560	ZNF438
90	chr10	22602134	33352828	10750694	chr10	31608100	31818742	210642	NM_001174095	ZEB1
90	chr10	22602134	33352828	10750694	chr10	31133564	31320866	187302	NM_001143767	ZNF438
90	chr10	22602134	33352828	10750694	chr10	31608100	31818742	210642	NM_030751	ZEB1
90	chr10	22602134	33352828	10750694	chr10	31605456	31608024	2568	NR_024284	ZEB1-AS1
90	chr10	22602134	33352828	10750694	chr10	31608100	31818742	210642	NM_001174096	ZEB1
90	chr10	22602134	33352828	10750694	chr10	31608100	31818742	210642	NM_001174093	ZEB1
90	chr10	22602134	33352828	10750694	chr10	32094325	32217804	123479	NM_001270698	ARHGAP12
90	chr10	22602134	33352828	10750694	chr10	32094325	32217804	123479	NM_001270697	ARHGAP12
90	chr10	22602134	33352828	10750694	chr10	32094325	32197854	103529	NM_001270699	ARHGAP12
90	chr10	22602134	33352828	10750694	chr10	31610063	31818742	208679	NM_001174094	ZEB1
90	chr10	22602134	33352828	10750694	chr10	32094325	32217804	123479	NM_018287	ARHGAP12
90	chr10	22602134	33352828	10750694	chr10	32094325	32217804	123479	NM_001270696	ARHGAP12
90	chr10	22602134	33352828	10750694	chr10	32094325	32217804	123479	NM_001270695	ARHGAP12
90	chr10	22602134	33352828	10750694	chr10	33189245	33247293	58048	NM_002211	ITGB1
90	chr10	22602134	33352828	10750694	chr10	32297937	32345371	47434	NM_004521	KIF5B
90	chr10	22602134	33352828	10750694	chr10	32735040	32863492	128452	NM_001026383	CCDC7
90	chr10	22602134	33352828	10750694	chr10	32556643	32667726	111083	NR_073538	EPC1
90	chr10	22602134	33352828	10750694	chr10	32556643	32636146	79503	NM_025209	EPC1
90	chr10	22602134	33352828	10750694	chr10	32556643	32636146	79503	NM_001272019	EPC1
90	chr10	22602134	33352828	10750694	chr10	32556643	32636146	79503	NM_001272004	EPC1
90	chr10	22602134	33352828	10750694	chr10	32735040	32863492	128452	NM_145023	CCDC7
90	chr10	22602134	33352828	10750694	chr10	32856650	33171792	315142	NM_024688	C10orf68
90	chr10	22602134	33352828	10750694	chr10	33189245	33224486	35241	NM_033668	ITGB1
90	chr10	22602134	33352828	10750694	chr10	33189245	33246822	57577	NM_133376	ITGB1
91	chr10	34232508	38783412	4550904	chr10	35484829	35501886	17057	NM_182723	CREM
91	chr10	34232508	38783412	4550904	chr10	34398487	35104253	705766	NM_019619	PARD3
91	chr10	34232508	38783412	4550904	chr10	34398487	35104253	705766	NM_001184790	PARD3
91	chr10	34232508	38783412	4550904	chr10	34398487	35104253	705766	NM_001184788	PARD3
91	chr10	34232508	38783412	4550904	chr10	34398487	35104253	705766	NM_001184787	PARD3
91	chr10	34232508	38783412	4550904	chr10	34398487	35104253	705766	NM_001184786	PARD3
91	chr10	34232508	38783412	4550904	chr10	34398487	35104253	705766	NM_001184785	PARD3
91	chr10	34232508	38783412	4550904	chr10	34398487	35104253	705766	NM_001184791	PARD3
91	chr10	34232508	38783412	4550904	chr10	35484054	35499678	15624	NM_001267568	CREM
91	chr10	34232508	38783412	4550904	chr10	35484054	35501886	17832	NM_182720	CREM
91	chr10	34232508	38783412	4550904	chr10	35415768	35501886	86118	NM_001267563	CREM
91	chr10	34232508	38783412	4550904	chr10	35297478	35363258	65780	NM_001198779	CUL2
91	chr10	34232508	38783412	4550904	chr10	34398487	35104253	705766	NM_001184789	PARD3
91	chr10	34232508	38783412	4550904	chr10	34601187	35104253	503066	NM_001184793	PARD3
91	chr10	34232508	38783412	4550904	chr10	34601187	35104253	503066	NM_001184792	PARD3
91	chr10	34232508	38783412	4550904	chr10	34601187	35104253	503066	NM_001184794	PARD3
91	chr10	34232508	38783412	4550904	chr10	35297478	35379570	82092	NM_001198777	CUL2
91	chr10	34232508	38783412	4550904	chr10	35297478	35363258	65780	NM_001198778	CUL2
91	chr10	34232508	38783412	4550904	chr10	35297478	35379311	81833	NM_003591	CUL2
91	chr10	34232508	38783412	4550904	chr10	35415768	35501886	86118	NM_001267562	CREM
91	chr10	34232508	38783412	4550904	chr10	35415768	35501886	86118	NR_051975	CREM
91	chr10	34232508	38783412	4550904	chr10	35415768	35501886	86118	NR_051974	CREM
91	chr10	34232508	38783412	4550904	chr10	35415768	35501886	86118	NR_051973	CREM
91	chr10	34232508	38783412	4550904	chr10	35456466	35501886	45420	NM_182771	CREM
91	chr10	34232508	38783412	4550904	chr10	35426709	35501886	75177	NM_183011	CREM
91	chr10	34232508	38783412	4550904	chr10	35415768	35501886	86118	NM_183013	CREM
91	chr10	34232508	38783412	4550904	chr10	35415768	35468775	53007	NM_001881	CREM
91	chr10	34232508	38783412	4550904	chr10	35416384	35501886	85502	NM_181571	CREM
91	chr10	34232508	38783412	4550904	chr10	35416384	35501886	85502	NM_183060	CREM
91	chr10	34232508	38783412	4550904	chr10	35456466	35468775	12309	NM_001267565	CREM
91	chr10	34232508	38783412	4550904	chr10	35426709	35501886	75177	NM_183012	CREM
91	chr10	34232508	38783412	4550904	chr10	35456466	35501886	45420	NM_001267564	CREM
91	chr10	34232508	38783412	4550904	chr10	35456466	35501886	45420	NM_182772	CREM
91	chr10	34232508	38783412	4550904	chr10	35464514	35501886	37372	NM_182769	CREM
91	chr10	34232508	38783412	4550904	chr10	35464514	35468775	4261	NM_001267566	CREM
91	chr10	34232508	38783412	4550904	chr10	35464514	35501886	37372	NM_001267567	CREM
91	chr10	34232508	38783412	4550904	chr10	35484054	35501886	17832	NM_182719	CREM
91	chr10	34232508	38783412	4550904	chr10	35464514	35501886	37372	NM_182770	CREM
91	chr10	34232508	38783412	4550904	chr10	35484054	35501886	17832	NM_182717	CREM
91	chr10	34232508	38783412	4550904	chr10	35484054	35501886	17832	NM_182718	CREM
91	chr10	34232508	38783412	4550904	chr10	35484829	35501886	17057	NR_051972	CREM
91	chr10	34232508	38783412	4550904	chr10	35484829	35501886	17057	NR_051971	CREM
91	chr10	34232508	38783412	4550904	chr10	35484054	35499678	15624	NM_001267569	CREM
91	chr10	34232508	38783412	4550904	chr10	35484829	35501886	17057	NM_001267570	CREM
91	chr10	34232508	38783412	4550904	chr10	35484829	35501886	17057	NM_182721	CREM
91	chr10	34232508	38783412	4550904	chr10	38117692	38146564	28872	NM_001267605	ZNF248
91	chr10	34232508	38783412	4550904	chr10	35484829	35501886	17057	NM_182724	CREM
91	chr10	34232508	38783412	4550904	chr10	35894337	35897863	3526	NM_153368	GJD4
91	chr10	34232508	38783412	4550904	chr10	35535952	35860847	324895	NM_181698	CCNY
91	chr10	34232508	38783412	4550904	chr10	35625801	35860847	235046	NM_145012	CCNY
91	chr10	34232508	38783412	4550904	chr10	38082865	38084103	1238	NR_051997	ZNF33BP1
91	chr10	34232508	38783412	4550904	chr10	37414784	37521495	106711	NM_052997	ANKRD30A
91	chr10	34232508	38783412	4550904	chr10	35927176	35930362	3186	NM_031866	FZD8
91	chr10	34232508	38783412	4550904	chr10	35930099	35930180	81	NR_039831	MIR4683
91	chr10	34232508	38783412	4550904	chr10	38065453	38146564	81111	NM_001267607	ZNF248
91	chr10	34232508	38783412	4550904	chr10	37890365	37891859	1494	NM_001190489	MTRNR2L7
91	chr10	34232508	38783412	4550904	chr10	38299577	38348995	49418	NM_001278174	ZNF33A
91	chr10	34232508	38783412	4550904	chr10	38299577	38348995	49418	NM_001278171	ZNF33A
91	chr10	34232508	38783412	4550904	chr10	38117692	38146564	28872	NM_021045	ZNF248
91	chr10	34232508	38783412	4550904	chr10	38117692	38147012	29320	NM_001267597	ZNF248
91	chr10	34232508	38783412	4550904	chr10	38117692	38146564	28872	NM_001267606	ZNF248
91	chr10	34232508	38783412	4550904	chr10	38238794	38265453	26659	NM_145011	ZNF25
91	chr10	34232508	38783412	4550904	chr10	38299577	38348995	49418	NM_001278175	ZNF33A
91	chr10	34232508	38783412	4550904	chr10	38299577	38348995	49418	NM_006954	ZNF33A
91	chr10	34232508	38783412	4550904	chr10	38299577	38348995	49418	NM_006974	ZNF33A
91	chr10	34232508	38783412	4550904	chr10	38299577	38348995	49418	NM_001278173	ZNF33A
91	chr10	34232508	38783412	4550904	chr10	38299577	38348995	49418	NM_001278170	ZNF33A
91	chr10	34232508	38783412	4550904	chr10	38299577	38348995	49418	NM_001278178	ZNF33A
91	chr10	34232508	38783412	4550904	chr10	38299577	38348995	49418	NM_001278176	ZNF33A
91	chr10	34232508	38783412	4550904	chr10	38299577	38348995	49418	NM_001278179	ZNF33A
91	chr10	34232508	38783412	4550904	chr10	38383263	38412278	29015	NM_001007094	ZNF37A
91	chr10	34232508	38783412	4550904	chr10	38383263	38412278	29015	NM_001178101	ZNF37A
91	chr10	34232508	38783412	4550904	chr10	38299577	38348995	49418	NM_001278177	ZNF33A
91	chr10	34232508	38783412	4550904	chr10	38383263	38412278	29015	NM_003421	ZNF37A
91	chr10	34232508	38783412	4550904	chr10	38464598	38503273	38675	NR_024524	LOC100129055
91	chr10	34232508	38783412	4550904	chr10	38671997	38691780	19783	NR_027269	SEPT7P9
91	chr10	34232508	38783412	4550904	chr10	38645307	38667433	22126	NR_003086	HSD17B7P2
91	chr10	34232508	38783412	4550904	chr10	38717073	38741081	24008	NR_024497	LOC399744
92	chr10	45212354	45359092	146738	chr10	45306471	45455137	148666	NR_033842	TMEM72-AS1
93	chr10	45468159	48317077	2848918	chr10	45659461	45659536	75	NR_036112	MIR3156-1
93	chr10	45468159	48317077	2848918	chr10	45594923	45650044	55121	NR_024472	RSU1P2
93	chr10	45468159	48317077	2848918	chr10	45471708	45474330	2622	NM_007021	C10orf10
93	chr10	45468159	48317077	2848918	chr10	45455218	45490172	34954	NM_032023	RASSF4
93	chr10	45468159	48317077	2848918	chr10	45493145	45496470	3325	NM_001039380	C10orf25
93	chr10	45468159	48317077	2848918	chr10	45496272	45500777	4505	NM_006963	ZNF22
93	chr10	45468159	48317077	2848918	chr10	45650109	45681489	31380	NR_033891	ANKRD30BP3
93	chr10	45468159	48317077	2848918	chr10	47894022	47949417	55395	NM_018232	FAM21B
93	chr10	45468159	48317077	2848918	chr10	45869623	45941567	71944	NM_001256153	ALOX5
93	chr10	45468159	48317077	2848918	chr10	45869623	45941567	71944	NM_001256154	ALOX5
93	chr10	45468159	48317077	2848918	chr10	45869623	45941567	71944	NM_000698	ALOX5
93	chr10	45468159	48317077	2848918	chr10	45798101	45811056	12955	NM_001004297	OR13A1
93	chr10	45468159	48317077	2848918	chr10	46222647	46288412	65765	NM_001169106	FAM21C
93	chr10	45468159	48317077	2848918	chr10	45952816	46030819	78003	NM_001002266	39508
93	chr10	45468159	48317077	2848918	chr10	45952816	46090354	137538	NM_145021	39508
93	chr10	45468159	48317077	2848918	chr10	45952816	46090354	137538	NM_001002265	39508
93	chr10	45468159	48317077	2848918	chr10	46222647	46288412	65765	NM_015262	FAM21C
93	chr10	45468159	48317077	2848918	chr10	46111038	46168251	57213	NM_001128324	ZFAND4
93	chr10	45468159	48317077	2848918	chr10	46111038	46168251	57213	NM_174890	ZFAND4
93	chr10	45468159	48317077	2848918	chr10	46222647	46288412	65765	NM_001169107	FAM21C
93	chr10	45468159	48317077	2848918	chr10	46550122	46640660	90538	NM_001042394	PTPN20A
93	chr10	45468159	48317077	2848918	chr10	46550122	46640660	90538	NM_001042362	PTPN20B
93	chr10	45468159	48317077	2848918	chr10	46550122	46641003	90881	NM_001042395	PTPN20A
93	chr10	45468159	48317077	2848918	chr10	46550122	46641003	90881	NM_001042387	PTPN20A
93	chr10	45468159	48317077	2848918	chr10	46550122	46641003	90881	NM_015605	PTPN20B
93	chr10	45468159	48317077	2848918	chr10	46321049	46342921	21872	NM_133446	AGAP4
93	chr10	45468159	48317077	2848918	chr10	46550122	46641003	90881	NM_001042396	PTPN20A
93	chr10	45468159	48317077	2848918	chr10	46550122	46640660	90538	NM_001042391	PTPN20A
93	chr10	45468159	48317077	2848918	chr10	46550122	46640660	90538	NM_001042360	PTPN20B
93	chr10	45468159	48317077	2848918	chr10	46550122	46640660	90538	NM_001042358	PTPN20B
93	chr10	45468159	48317077	2848918	chr10	46550122	46620058	69936	NM_001042357	PTPN20B
93	chr10	45468159	48317077	2848918	chr10	46550122	46640660	90538	NM_001042361	PTPN20B
93	chr10	45468159	48317077	2848918	chr10	46550122	46640660	90538	NM_001042393	PTPN20A
93	chr10	45468159	48317077	2848918	chr10	46550122	46620058	69936	NM_001042389	PTPN20A
93	chr10	45468159	48317077	2848918	chr10	46550122	46640660	90538	NM_001042359	PTPN20B
93	chr10	45468159	48317077	2848918	chr10	46550122	46641003	90881	NM_001042397	PTPN20A
93	chr10	45468159	48317077	2848918	chr10	46550122	46640660	90538	NM_001042390	PTPN20A
93	chr10	45468159	48317077	2848918	chr10	46550122	46641003	90881	NM_001042364	PTPN20B
93	chr10	45468159	48317077	2848918	chr10	46550122	46641003	90881	NM_001042363	PTPN20B
93	chr10	45468159	48317077	2848918	chr10	46550122	46641003	90881	NM_001042365	PTPN20B
93	chr10	45468159	48317077	2848918	chr10	46955443	46970601	15158	NM_181519	SYT15
93	chr10	45468159	48317077	2848918	chr10	46897640	46939145	41505	NR_027632	FAM35BP
93	chr10	45468159	48317077	2848918	chr10	46550122	46640660	90538	NM_001042392	PTPN20A
93	chr10	45468159	48317077	2848918	chr10	46764667	46768346	3679	NR_048574	GLUD1P7
93	chr10	45468159	48317077	2848918	chr10	46737612	46762892	25280	NR_026566	BMS1P1
93	chr10	45468159	48317077	2848918	chr10	46737612	46762892	25280	NR_003611	BMS1P5
93	chr10	45468159	48317077	2848918	chr10	47177221	47181688	4467	NM_001137549	FAM25G
93	chr10	45468159	48317077	2848918	chr10	47096453	47151400	54947	NR_033957	LINC00842
93	chr10	45468159	48317077	2848918	chr10	46993545	47000568	7023	NM_014696	GPRIN2
93	chr10	45468159	48317077	2848918	chr10	46957880	46970601	12721	NM_031912	SYT15
93	chr10	45468159	48317077	2848918	chr10	47083533	47088320	4787	NM_005972	NPY4R
93	chr10	45468159	48317077	2848918	chr10	47157988	47174040	16052	NM_001098845	ANXA8L1
93	chr10	45468159	48317077	2848918	chr10	47157983	47174143	16160	NM_001040084	ANXA8
93	chr10	45468159	48317077	2848918	chr10	47157983	47174143	16160	NM_001271702	ANXA8
93	chr10	45468159	48317077	2848918	chr10	47157983	47174143	16160	NM_001271703	ANXA8
93	chr10	45468159	48317077	2848918	chr10	47133294	47133836	542	NR_003277	HNRNPA1P33
93	chr10	45468159	48317077	2848918	chr10	47177221	47181688	4467	NM_001137548	FAM25C
93	chr10	45468159	48317077	2848918	chr10	47177221	47181688	4467	NM_001137556	FAM25B
93	chr10	45468159	48317077	2848918	chr10	47379719	47421238	41519	NR_027634	FAM35DP
93	chr10	45468159	48317077	2848918	chr10	47225570	47243511	17941	NR_072978	BMS1P2
93	chr10	45468159	48317077	2848918	chr10	47191843	47213626	21783	NM_001190810	AGAP9
93	chr10	45468159	48317077	2848918	chr10	47225570	47243511	17941	NR_024495	BMS1P6
93	chr10	45468159	48317077	2848918	chr10	47746919	47763040	16121	NM_001630	ANXA8L2
93	chr10	45468159	48317077	2848918	chr10	48247661	48252125	4464	NM_001137548	FAM25C
93	chr10	45468159	48317077	2848918	chr10	48247661	48252125	4464	NM_001137556	FAM25B
93	chr10	45468159	48317077	2848918	chr10	48155942	48158691	2749	NR_033407	CTSL1P2
93	chr10	45468159	48317077	2848918	chr10	48185838	48203780	17942	NR_072978	BMS1P2
93	chr10	45468159	48317077	2848918	chr10	48185838	48203780	17942	NR_024495	BMS1P6
93	chr10	45468159	48317077	2848918	chr10	48247661	48252125	4464	NM_001137549	FAM25G
93	chr10	45468159	48317077	2848918	chr10	48215723	48237508	21785	NM_001190810	AGAP9
93	chr10	45468159	48317077	2848918	chr10	48255203	48271368	16165	NM_001271703	ANXA8
93	chr10	45468159	48317077	2848918	chr10	48255306	48271363	16057	NM_001098845	ANXA8L1
93	chr10	45468159	48317077	2848918	chr10	48255203	48271368	16165	NM_001271702	ANXA8
93	chr10	45468159	48317077	2848918	chr10	48255203	48271368	16165	NM_001040084	ANXA8
94	chr10	57960445	58121793	161348	chr10	58117198	58121034	3836	NM_032997	ZWINT
94	chr10	57960445	58121793	161348	chr10	58117198	58121034	3836	NM_001005413	ZWINT
94	chr10	57960445	58121793	161348	chr10	58117198	58121034	3836	NM_007057	ZWINT
95	chr10	64572966	64762739	189773	chr10	64571755	64578927	7172	NM_001136178	EGR2
95	chr10	64572966	64762739	189773	chr10	64571755	64576126	4371	NM_001136179	EGR2
95	chr10	64572966	64762739	189773	chr10	64571755	64576126	4371	NM_001136177	EGR2
95	chr10	64572966	64762739	189773	chr10	64571755	64576126	4371	NM_000399	EGR2
96	chr10	64902960	65092733	189773	chr10	64926987	65225722	298735	NM_032776	JMJD1C
96	chr10	64902960	65092733	189773	chr10	64926987	65028982	101995	NM_004241	JMJD1C
96	chr10	64902960	65092733	189773	chr10	64893006	64914786	21780	NM_030759	NRBF2
97	chr10	67840464	68599136	758672	chr10	67679724	69425416	1745692	NM_001127384	CTNNA3
97	chr10	67840464	68599136	758672	chr10	67679724	69455949	1776225	NM_013266	CTNNA3
98	chr10	81674576	88847381	7172805	chr10	85980248	85985284	5036	NM_001017924	LRIT2
98	chr10	81674576	88847381	7172805	chr10	81839000	81852307	13307	NR_072984	TMEM254
98	chr10	81674576	88847381	7172805	chr10	81838401	81852307	13906	NM_001270373	TMEM254
98	chr10	81674576	88847381	7172805	chr10	81664653	81691557	26904	NR_033857	LOC100288974
98	chr10	81674576	88847381	7172805	chr10	81838401	81852307	13906	NM_001270371	TMEM254
98	chr10	81674576	88847381	7172805	chr10	81838401	81852307	13906	NM_025125	TMEM254
98	chr10	81674576	88847381	7172805	chr10	81805988	81838949	32961	NR_027432	TMEM254-AS1
98	chr10	81674576	88847381	7172805	chr10	81805988	81838949	32961	NR_027430	TMEM254-AS1
98	chr10	81674576	88847381	7172805	chr10	81697495	81708861	11366	NM_003019	SFTPD
98	chr10	81674576	88847381	7172805	chr10	81679933	81682875	2942	NR_002724	MBL1P
98	chr10	81674576	88847381	7172805	chr10	81805988	81838949	32961	NR_027429	TMEM254-AS1
98	chr10	81674576	88847381	7172805	chr10	81805988	81838949	32961	NR_027431	TMEM254-AS1
98	chr10	81674576	88847381	7172805	chr10	81805988	81838949	32961	NR_027428	TMEM254-AS1
98	chr10	81674576	88847381	7172805	chr10	81838401	81852307	13906	NM_001270370	TMEM254
98	chr10	81674576	88847381	7172805	chr10	81838401	81852307	13906	NM_001270372	TMEM254
98	chr10	81674576	88847381	7172805	chr10	81838778	81852307	13529	NM_001270369	TMEM254
98	chr10	81674576	88847381	7172805	chr10	81838778	81852307	13529	NM_001270368	TMEM254
98	chr10	81674576	88847381	7172805	chr10	81838778	81852307	13529	NM_001270367	TMEM254
98	chr10	81674576	88847381	7172805	chr10	81839000	81852307	13307	NM_001270374	TMEM254
98	chr10	81674576	88847381	7172805	chr10	82095860	82116514	20654	NM_138812	DYDC1
98	chr10	81674576	88847381	7172805	chr10	81914879	81965328	50449	NM_001157	ANXA11
98	chr10	81674576	88847381	7172805	chr10	81914879	81965328	50449	NM_145869	ANXA11
98	chr10	81674576	88847381	7172805	chr10	81839000	81852307	13307	NR_072986	TMEM254
98	chr10	81674576	88847381	7172805	chr10	81839000	81852307	13307	NR_072985	TMEM254
98	chr10	81674576	88847381	7172805	chr10	81892257	81904784	12527	NM_001012973	PLAC9
98	chr10	81674576	88847381	7172805	chr10	81839000	81852307	13307	NR_072987	TMEM254
98	chr10	81674576	88847381	7172805	chr10	81914879	81965328	50449	NM_145868	ANXA11
98	chr10	81674576	88847381	7172805	chr10	82031575	82049434	17859	NM_000429	MAT1A
98	chr10	81674576	88847381	7172805	chr10	81967465	81979413	11948	NR_038464	LINC00857
98	chr10	81674576	88847381	7172805	chr10	82116523	82127829	11306	NM_032372	DYDC2
98	chr10	81674576	88847381	7172805	chr10	82104500	82127829	23329	NR_070309	DYDC2
98	chr10	81674576	88847381	7172805	chr10	82104500	82127829	23329	NR_070308	DYDC2
98	chr10	81674576	88847381	7172805	chr10	82095860	82116514	20654	NM_001269053	DYDC1
98	chr10	81674576	88847381	7172805	chr10	82104500	82127829	23329	NM_001270042	DYDC2
98	chr10	81674576	88847381	7172805	chr10	82116523	82127829	11306	NM_001270041	DYDC2
98	chr10	81674576	88847381	7172805	chr10	82173574	82192753	19179	NM_001243782	FAM213A
98	chr10	81674576	88847381	7172805	chr10	82168241	82192753	24512	NM_001243781	FAM213A
98	chr10	81674576	88847381	7172805	chr10	82167584	82192753	25169	NM_001243779	FAM213A
98	chr10	81674576	88847381	7172805	chr10	82168241	82192753	24512	NM_032333	FAM213A
98	chr10	81674576	88847381	7172805	chr10	82168241	82192753	24512	NM_001243780	FAM213A
98	chr10	81674576	88847381	7172805	chr10	82173574	82192753	19179	NM_001243778	FAM213A
98	chr10	81674576	88847381	7172805	chr10	83637442	84746935	1109493	NM_001165973	NRG3
98	chr10	81674576	88847381	7172805	chr10	83635069	84746935	1111866	NM_001165972	NRG3
98	chr10	81674576	88847381	7172805	chr10	82300574	82406316	105742	NM_001145719	SH2D4B
98	chr10	81674576	88847381	7172805	chr10	82297657	82406316	108659	NM_207372	SH2D4B
98	chr10	81674576	88847381	7172805	chr10	82214037	82282391	68354	NM_001128309	TSPAN14
98	chr10	81674576	88847381	7172805	chr10	82214037	82282391	68354	NM_030927	TSPAN14
98	chr10	81674576	88847381	7172805	chr10	83635069	84746935	1111866	NM_001010848	NRG3
98	chr10	81674576	88847381	7172805	chr10	85954411	85979376	24965	NM_001171971	CDHR1
98	chr10	81674576	88847381	7172805	chr10	85933553	85945050	11497	NM_207373	C10orf99
98	chr10	81674576	88847381	7172805	chr10	85899184	85913311	14127	NM_014394	GHITM
98	chr10	81674576	88847381	7172805	chr10	85954411	85977121	22710	NM_033100	CDHR1
98	chr10	81674576	88847381	7172805	chr10	86004808	86018944	14136	NM_001012720	RGR
98	chr10	81674576	88847381	7172805	chr10	85991275	86001217	9942	NM_015613	LRIT1
98	chr10	81674576	88847381	7172805	chr10	88428425	88495824	67399	NM_007078	LDB3
98	chr10	81674576	88847381	7172805	chr10	88414313	88426216	11903	NM_001030015	OPN4
98	chr10	81674576	88847381	7172805	chr10	88195012	88281541	86529	NM_015045	WAPAL
98	chr10	81674576	88847381	7172805	chr10	86004808	86018944	14136	NM_001012722	RGR
98	chr10	81674576	88847381	7172805	chr10	87337487	87366972	29485	NR_038986	GRID1-AS1
98	chr10	81674576	88847381	7172805	chr10	86088409	86278276	189867	NM_018999	CCSER2
98	chr10	81674576	88847381	7172805	chr10	86004808	86018944	14136	NM_002921	RGR
98	chr10	81674576	88847381	7172805	chr10	86039735	86054415	14680	NR_038220	LINC00858
98	chr10	81674576	88847381	7172805	chr10	87359311	88126250	766939	NM_017551	GRID1
98	chr10	81674576	88847381	7172805	chr10	88024450	88024545	95	NR_029907	MIR346
98	chr10	81674576	88847381	7172805	chr10	88428205	88495824	67619	NM_001171610	LDB3
98	chr10	81674576	88847381	7172805	chr10	88414313	88426216	11903	NM_033282	OPN4
98	chr10	81674576	88847381	7172805	chr10	88428425	88495824	67399	NM_001080114	LDB3
98	chr10	81674576	88847381	7172805	chr10	88428425	88459810	31385	NM_001080115	LDB3
98	chr10	81674576	88847381	7172805	chr10	88428320	88459810	31490	NM_001080116	LDB3
98	chr10	81674576	88847381	7172805	chr10	88428425	88459810	31385	NM_001171611	LDB3
98	chr10	81674576	88847381	7172805	chr10	88730497	88769960	39463	NM_133447	AGAP11
98	chr10	81674576	88847381	7172805	chr10	88695297	88717425	22128	NM_024756	MMRN2
98	chr10	81674576	88847381	7172805	chr10	88516395	88684945	168550	NM_004329	BMPR1A
98	chr10	81674576	88847381	7172805	chr10	88718287	88723017	4730	NM_003087	SNCG
98	chr10	81674576	88847381	7172805	chr10	88728187	88730666	2479	NM_006829	ADIRF
98	chr10	81674576	88847381	7172805	chr10	88809958	88854776	44818	NM_005271	GLUD1
98	chr10	81674576	88847381	7172805	chr10	88780045	88784487	4442	NM_001146157	FAM25A
99	chr10	96678860	102125994	5447134	chr10	99894380	100004654	110274	NM_001256620	R3HCC1L
99	chr10	96678860	102125994	5447134	chr10	99496877	99520664	23787	NM_001174119	ZFYVE27
99	chr10	96678860	102125994	5447134	chr10	97951454	98031273	79819	NR_047682	BLNK
99	chr10	96678860	102125994	5447134	chr10	97071529	97321171	249642	NM_024991	SORBS1
99	chr10	96678860	102125994	5447134	chr10	97071529	97200937	129408	NM_001034955	SORBS1
99	chr10	96678860	102125994	5447134	chr10	97071529	97200937	129408	NM_001034954	SORBS1
99	chr10	96678860	102125994	5447134	chr10	96953956	96988686	34730	NM_207321	C10orf129
99	chr10	96678860	102125994	5447134	chr10	96698414	96749148	50734	NM_000771	CYP2C9
99	chr10	96678860	102125994	5447134	chr10	96796528	96829254	32726	NM_001198853	CYP2C8
99	chr10	96678860	102125994	5447134	chr10	96796528	96829254	32726	NM_001198854	CYP2C8
99	chr10	96678860	102125994	5447134	chr10	96796528	96829254	32726	NM_000770	CYP2C8
99	chr10	96678860	102125994	5447134	chr10	96796528	96829254	32726	NM_001198855	CYP2C8
99	chr10	96678860	102125994	5447134	chr10	97071529	97200937	129408	NM_006434	SORBS1
99	chr10	96678860	102125994	5447134	chr10	96997324	97050905	53581	NM_020992	PDLIM1
99	chr10	96678860	102125994	5447134	chr10	97071529	97321171	249642	NM_015385	SORBS1
99	chr10	96678860	102125994	5447134	chr10	97667721	97698415	30694	NM_001130446	C10orf131
99	chr10	96678860	102125994	5447134	chr10	97515672	97637023	121351	NM_001164182	ENTPD1
99	chr10	96678860	102125994	5447134	chr10	97071529	97200937	129408	NM_001034957	SORBS1
99	chr10	96678860	102125994	5447134	chr10	97423152	97453900	30748	NM_015631	TCTN3
99	chr10	96678860	102125994	5447134	chr10	97071529	97200937	129408	NM_001034956	SORBS1
99	chr10	96678860	102125994	5447134	chr10	97365685	97416567	50882	NM_001017423	ALDH18A1
99	chr10	96678860	102125994	5447134	chr10	97365685	97416567	50882	NM_002860	ALDH18A1
99	chr10	96678860	102125994	5447134	chr10	97471535	97637023	165488	NM_001098175	ENTPD1
99	chr10	96678860	102125994	5447134	chr10	97423152	97453900	30748	NM_001143973	TCTN3
99	chr10	96678860	102125994	5447134	chr10	97515408	97637023	121615	NM_001164181	ENTPD1
99	chr10	96678860	102125994	5447134	chr10	97515408	97637023	121615	NM_001164178	ENTPD1
99	chr10	96678860	102125994	5447134	chr10	97512962	97849992	337030	NR_038444	ENTPD1-AS1
99	chr10	96678860	102125994	5447134	chr10	97515672	97637023	121351	NM_001164179	ENTPD1
99	chr10	96678860	102125994	5447134	chr10	97515672	97637023	121351	NM_001776	ENTPD1
99	chr10	96678860	102125994	5447134	chr10	97515672	97637023	121351	NM_001164183	ENTPD1
99	chr10	96678860	102125994	5447134	chr10	97803158	97820625	17467	NM_001134375	CCNJ
99	chr10	96678860	102125994	5447134	chr10	97759847	97792441	32594	NM_001001732	CC2D2B
99	chr10	96678860	102125994	5447134	chr10	97759847	97792441	32594	NM_001159747	CC2D2B
99	chr10	96678860	102125994	5447134	chr10	97803158	97820625	17467	NM_019084	CCNJ
99	chr10	96678860	102125994	5447134	chr10	97824071	97824156	85	NR_036113	MIR3157
99	chr10	96678860	102125994	5447134	chr10	97803158	97820625	17467	NM_001134376	CCNJ
99	chr10	96678860	102125994	5447134	chr10	97889471	97923517	34046	NM_014803	ZNF518A
99	chr10	96678860	102125994	5447134	chr10	97951454	98031273	79819	NR_047683	BLNK
99	chr10	96678860	102125994	5447134	chr10	97951454	98031273	79819	NR_047680	BLNK
99	chr10	96678860	102125994	5447134	chr10	98353068	98480279	127211	NM_152309	PIK3AP1
99	chr10	96678860	102125994	5447134	chr10	98064084	98098321	34237	NM_001017520	DNTT
99	chr10	96678860	102125994	5447134	chr10	97951454	98031273	79819	NM_001258441	BLNK
99	chr10	96678860	102125994	5447134	chr10	97951454	98031273	79819	NM_001258440	BLNK
99	chr10	96678860	102125994	5447134	chr10	97951454	98031273	79819	NR_047681	BLNK
99	chr10	96678860	102125994	5447134	chr10	97951454	98031333	79879	NM_001114094	BLNK
99	chr10	96678860	102125994	5447134	chr10	97951454	98031333	79879	NM_013314	BLNK
99	chr10	96678860	102125994	5447134	chr10	97951454	98031273	79819	NM_001258442	BLNK
99	chr10	96678860	102125994	5447134	chr10	98064084	98098321	34237	NM_004088	DNTT
99	chr10	96678860	102125994	5447134	chr10	98102974	98119092	16118	NM_001040103	OPALIN
99	chr10	96678860	102125994	5447134	chr10	98102974	98119092	16118	NM_001040102	OPALIN
99	chr10	96678860	102125994	5447134	chr10	98124362	98273683	149321	NM_012465	TLL2
99	chr10	96678860	102125994	5447134	chr10	98102974	98119092	16118	NM_033207	OPALIN
99	chr10	96678860	102125994	5447134	chr10	98277866	98346809	68943	NM_020123	TM9SF3
99	chr10	96678860	102125994	5447134	chr10	98862512	98863504	992	NR_038330	LOC100505540
99	chr10	96678860	102125994	5447134	chr10	98592016	98724198	132182	NM_001170765	LCOR
99	chr10	96678860	102125994	5447134	chr10	98757794	98945683	187889	NM_003061	SLIT1
99	chr10	96678860	102125994	5447134	chr10	98592016	98724198	132182	NM_001170766	LCOR
99	chr10	96678860	102125994	5447134	chr10	98592711	98724198	131487	NM_032440	LCOR
99	chr10	96678860	102125994	5447134	chr10	98741040	98745585	4545	NM_015652	C10orf12
99	chr10	96678860	102125994	5447134	chr10	99205946	99217127	11181	NM_198046	ZDHHC16
99	chr10	96678860	102125994	5447134	chr10	98981929	99030447	48518	NM_001256423	ARHGAP19
99	chr10	96678860	102125994	5447134	chr10	98912798	99052430	139632	NR_037909	ARHGAP19-SLIT1
99	chr10	96678860	102125994	5447134	chr10	98981929	99052430	70501	NM_001204300	ARHGAP19
99	chr10	96678860	102125994	5447134	chr10	98981929	99052430	70501	NM_032900	ARHGAP19
99	chr10	96678860	102125994	5447134	chr10	99079021	99081672	2651	NM_005479	FRAT1
99	chr10	96678860	102125994	5447134	chr10	99205929	99217127	11198	NM_198045	ZDHHC16
99	chr10	96678860	102125994	5447134	chr10	99205929	99217127	11198	NM_198044	ZDHHC16
99	chr10	96678860	102125994	5447134	chr10	99205929	99217127	11198	NM_032327	ZDHHC16
99	chr10	96678860	102125994	5447134	chr10	99092253	99094458	2205	NM_012083	FRAT2
99	chr10	96678860	102125994	5447134	chr10	99195665	99205768	10103	NM_016046	EXOSC1
99	chr10	96678860	102125994	5447134	chr10	99116457	99161127	44670	NM_001145114	RRP12
99	chr10	96678860	102125994	5447134	chr10	99116457	99161127	44670	NM_015179	RRP12
99	chr10	96678860	102125994	5447134	chr10	99186026	99193198	7172	NM_002629	PGAM1
99	chr10	96678860	102125994	5447134	chr10	99205929	99217127	11198	NM_198043	ZDHHC16
99	chr10	96678860	102125994	5447134	chr10	99344101	99372555	28454	NM_138413	HOGA1
99	chr10	96678860	102125994	5447134	chr10	99332255	99343641	11386	NM_020349	ANKRD2
99	chr10	96678860	102125994	5447134	chr10	99258767	99330960	72193	NM_024954	UBTD1
99	chr10	96678860	102125994	5447134	chr10	99218080	99258366	40286	NM_022362	MMS19
99	chr10	96678860	102125994	5447134	chr10	99332255	99343641	11386	NM_001129981	ANKRD2
99	chr10	96678860	102125994	5447134	chr10	99354974	99354995	21	NR_049868	MIR5692C2
99	chr10	96678860	102125994	5447134	chr10	99344101	99372555	28454	NM_001134670	HOGA1
99	chr10	96678860	102125994	5447134	chr10	99349449	99350691	1242	NM_001009997	C10orf62
99	chr10	96678860	102125994	5447134	chr10	99473464	99477909	4445	NM_031484	MARVELD1
99	chr10	96678860	102125994	5447134	chr10	99374309	99393913	19604	NM_001098831	MORN4
99	chr10	96678860	102125994	5447134	chr10	99374309	99393344	19035	NM_178832	MORN4
99	chr10	96678860	102125994	5447134	chr10	99437180	99447015	9835	NM_021732	AVPI1
99	chr10	96678860	102125994	5447134	chr10	99400442	99436187	35745	NM_018425	PI4K2A
99	chr10	96678860	102125994	5447134	chr10	99496877	99520664	23787	NM_144588	ZFYVE27
99	chr10	96678860	102125994	5447134	chr10	99496877	99520664	23787	NM_001174122	ZFYVE27
99	chr10	96678860	102125994	5447134	chr10	99496877	99520664	23787	NM_001174121	ZFYVE27
99	chr10	96678860	102125994	5447134	chr10	99496877	99520664	23787	NM_001174120	ZFYVE27
99	chr10	96678860	102125994	5447134	chr10	99894380	100004654	110274	NM_001256621	R3HCC1L
99	chr10	96678860	102125994	5447134	chr10	99526507	99531756	5249	NM_003015	SFRP5
99	chr10	96678860	102125994	5447134	chr10	99498233	99520664	22431	NM_001002261	ZFYVE27
99	chr10	96678860	102125994	5447134	chr10	99496877	99520664	23787	NM_001002262	ZFYVE27
99	chr10	96678860	102125994	5447134	chr10	99609994	99631335	21341	NM_001010917	GOLGA7B
99	chr10	96678860	102125994	5447134	chr10	99624756	99790585	165829	NM_018058	CRTAC1
99	chr10	96678860	102125994	5447134	chr10	99639382	99790585	151203	NM_001206528	CRTAC1
99	chr10	96678860	102125994	5447134	chr10	99894380	100004654	110274	NM_001256619	R3HCC1L
99	chr10	96678860	102125994	5447134	chr10	101491957	101515894	23937	NM_015960	CUTC
99	chr10	96678860	102125994	5447134	chr10	100154974	100155064	90	NR_031619	MIR1287
99	chr10	96678860	102125994	5447134	chr10	100007442	100028007	20565	NM_032211	LOXL4
99	chr10	96678860	102125994	5447134	chr10	99894380	100004654	110274	NM_014472	R3HCC1L
99	chr10	96678860	102125994	5447134	chr10	99894380	100004654	110274	NM_138469	R3HCC1L
99	chr10	96678860	102125994	5447134	chr10	100143321	100174978	31657	NM_032709	PYROXD2
99	chr10	96678860	102125994	5447134	chr10	100175954	100206704	30750	NM_000195	HPS1
99	chr10	96678860	102125994	5447134	chr10	101419262	101471002	51740	NM_020354	ENTPD7
99	chr10	96678860	102125994	5447134	chr10	100216833	100995632	778799	NM_021828	HPSE2
99	chr10	96678860	102125994	5447134	chr10	100191048	100191117	69	NR_039833	MIR4685
99	chr10	96678860	102125994	5447134	chr10	100188902	100206704	17802	NM_182639	HPS1
99	chr10	96678860	102125994	5447134	chr10	101156626	101190530	33904	NM_002079	GOT1
99	chr10	96678860	102125994	5447134	chr10	101088855	101154087	65232	NM_020348	CNNM1
99	chr10	96678860	102125994	5447134	chr10	100216833	100995632	778799	NM_001166246	HPSE2
99	chr10	96678860	102125994	5447134	chr10	100216833	100995632	778799	NM_001166245	HPSE2
99	chr10	96678860	102125994	5447134	chr10	100216833	100995632	778799	NM_001166244	HPSE2
99	chr10	96678860	102125994	5447134	chr10	101292689	101296280	3591	NM_145285	NKX2-3
99	chr10	96678860	102125994	5447134	chr10	101370274	101380221	9947	NM_031212	SLC25A28
99	chr10	96678860	102125994	5447134	chr10	101468504	101492423	23919	NM_078470	COX15
99	chr10	96678860	102125994	5447134	chr10	101468504	101492423	23919	NM_004376	COX15
99	chr10	96678860	102125994	5447134	chr10	101992054	102027437	35383	NM_018294	CWF19L1
99	chr10	96678860	102125994	5447134	chr10	101635333	101769676	134343	NM_015221	DNMBP
99	chr10	96678860	102125994	5447134	chr10	101542462	101611662	69200	NM_000392	ABCC2
99	chr10	96678860	102125994	5447134	chr10	101686965	101718755	31790	NR_024130	DNMBP-AS1
99	chr10	96678860	102125994	5447134	chr10	101802064	101841642	39578	NM_001308	CPN1
99	chr10	96678860	102125994	5447134	chr10	101909846	101945814	35968	NM_001100626	ERLIN1
99	chr10	96678860	102125994	5447134	chr10	101948123	101989344	41221	NM_001278	CHUK
99	chr10	96678860	102125994	5447134	chr10	101909846	101945734	35888	NM_006459	ERLIN1
99	chr10	96678860	102125994	5447134	chr10	102033034	102046116	13082	NR_046296	BLOC1S2
99	chr10	96678860	102125994	5447134	chr10	102033034	102046469	13435	NM_173809	BLOC1S2
99	chr10	96678860	102125994	5447134	chr10	102033034	102046469	13435	NR_046314	BLOC1S2
99	chr10	96678860	102125994	5447134	chr10	101996912	101997059	147	NR_002954	SNORA12
99	chr10	96678860	102125994	5447134	chr10	102033034	102046469	13435	NR_046315	BLOC1S2
99	chr10	96678860	102125994	5447134	chr10	102106771	102124588	17817	NM_005063	SCD
99	chr10	96678860	102125994	5447134	chr10	102047902	102090243	42341	NM_001253837	PKD2L1
99	chr10	96678860	102125994	5447134	chr10	102047902	102090243	42341	NM_016112	PKD2L1
100	chr10	130205988	135434178	5228190	chr10	133747959	133770053	22094	NR_033191	PPP2R2D
100	chr10	130205988	135434178	5228190	chr10	132760850	132760931	81	NR_036180	MIR378C
100	chr10	130205988	135434178	5228190	chr10	131633495	131762091	128596	NM_001005463	EBF3
100	chr10	130205988	135434178	5228190	chr10	131265453	131565783	300330	NM_002412	MGMT
100	chr10	130205988	135434178	5228190	chr10	131641562	131641638	76	NR_036179	MIR4297
100	chr10	130205988	135434178	5228190	chr10	131904272	131907101	2829	NR_044994	CTAGE7P
100	chr10	130205988	135434178	5228190	chr10	131862161	131909081	46920	NR_034125	LOC387723
100	chr10	130205988	135434178	5228190	chr10	131934638	131977932	43294	NM_006541	GLRX3
100	chr10	130205988	135434178	5228190	chr10	131934638	131978646	44008	NM_001199868	GLRX3
100	chr10	130205988	135434178	5228190	chr10	132890654	133109984	219330	NM_174937	TCERG1L
100	chr10	130205988	135434178	5228190	chr10	133604733	133622535	17802	NR_038365	FLJ46300
100	chr10	130205988	135434178	5228190	chr10	133747959	133770053	22094	NM_018461	PPP2R2D
100	chr10	130205988	135434178	5228190	chr10	135092133	135125841	33708	NR_046330	TUBGCP2
100	chr10	130205988	135434178	5228190	chr10	135075919	135090407	14488	NM_001164490	ADAM8
100	chr10	130205988	135434178	5228190	chr10	134020995	134121477	100482	NM_173575	STK32C
100	chr10	130205988	135434178	5228190	chr10	133918312	133998313	80001	NM_001105521	JAKMIP3
100	chr10	130205988	135434178	5228190	chr10	133781203	133795435	14232	NM_004052	BNIP3
100	chr10	130205988	135434178	5228190	chr10	134000413	134019280	18867	NM_006426	DPYSL4
100	chr10	130205988	135434178	5228190	chr10	134973970	135039916	65946	NM_152643	KNDC1
100	chr10	130205988	135434178	5228190	chr10	134150610	134180509	29899	NR_026559	LRRC27
100	chr10	130205988	135434178	5228190	chr10	134145613	134166901	21288	NM_001143759	LRRC27
100	chr10	130205988	135434178	5228190	chr10	134145613	134166901	21288	NM_001143758	LRRC27
100	chr10	130205988	135434178	5228190	chr10	134145740	134195010	49270	NM_001143757	LRRC27
100	chr10	130205988	135434178	5228190	chr10	134145613	134195010	49397	NM_030626	LRRC27
100	chr10	130205988	135434178	5228190	chr10	134621895	134756089	134194	NM_001200049	TTC40
100	chr10	130205988	135434178	5228190	chr10	134258713	134261825	3112	NM_173541	C10orf91
100	chr10	130205988	135434178	5228190	chr10	134210701	134231358	20657	NM_001098637	PWWP2B
100	chr10	130205988	135434178	5228190	chr10	134210701	134231358	20657	NM_138499	PWWP2B
100	chr10	130205988	135434178	5228190	chr10	134351352	134596984	245632	NM_005539	INPP5A
100	chr10	130205988	135434178	5228190	chr10	134598319	134599537	1218	NM_177400	NKX6-2
100	chr10	130205988	135434178	5228190	chr10	134779037	134790001	10964	NR_046231	LOC399829
100	chr10	130205988	135434178	5228190	chr10	134901408	134945179	43771	NM_001083909	GPR123
100	chr10	130205988	135434178	5228190	chr10	135051407	135055433	4026	NM_014468	VENTX
100	chr10	130205988	135434178	5228190	chr10	135043777	135045062	1285	NM_003577	UTF1
100	chr10	130205988	135434178	5228190	chr10	135075919	135090407	14488	NM_001109	ADAM8
100	chr10	130205988	135434178	5228190	chr10	135061014	135061124	110	NR_030170	MIR202
100	chr10	130205988	135434178	5228190	chr10	135075919	135090407	14488	NM_001164489	ADAM8
100	chr10	130205988	135434178	5228190	chr10	135092133	135122660	30527	NM_001256617	TUBGCP2
100	chr10	130205988	135434178	5228190	chr10	135092133	135122660	30527	NM_006659	TUBGCP2
100	chr10	130205988	135434178	5228190	chr10	135092133	135122660	30527	NM_001256618	TUBGCP2
100	chr10	130205988	135434178	5228190	chr10	135192740	135205198	12458	NM_207127	PAOX
100	chr10	130205988	135434178	5228190	chr10	135122422	135126666	4244	NM_145806	ZNF511
100	chr10	130205988	135434178	5228190	chr10	135168794	135171529	2735	NM_001098483	FUOM
100	chr10	130205988	135434178	5228190	chr10	135160843	135166187	5344	NM_145202	PRAP1
100	chr10	130205988	135434178	5228190	chr10	135138927	135150475	11548	NM_015722	CALY
100	chr10	130205988	135434178	5228190	chr10	135160843	135166187	5344	NM_001145201	PRAP1
100	chr10	130205988	135434178	5228190	chr10	135168657	135171529	2872	NM_198472	FUOM
100	chr10	130205988	135434178	5228190	chr10	135175986	135186908	10922	NM_004092	ECHS1
100	chr10	130205988	135434178	5228190	chr10	135192740	135205198	12458	NM_152911	PAOX
100	chr10	130205988	135434178	5228190	chr10	135185059	135185167	108	NR_037509	MIR3944
100	chr10	130205988	135434178	5228190	chr10	135207620	135234174	26554	NM_138384	MTG1
100	chr10	130205988	135434178	5228190	chr10	135192740	135205198	12458	NM_207128	PAOX
100	chr10	130205988	135434178	5228190	chr10	135234169	135238121	3952	NM_001012508	SPRN
100	chr10	130205988	135434178	5228190	chr10	135368347	135379138	10791	NM_001143764	SYCE1
100	chr10	130205988	135434178	5228190	chr10	135367403	135382876	15473	NM_130784	SYCE1
100	chr10	130205988	135434178	5228190	chr10	135367403	135379138	11735	NM_001143763	SYCE1
100	chr10	130205988	135434178	5228190	chr10	135340866	135352620	11754	NM_000773	CYP2E1
100	chr10	130205988	135434178	5228190	chr10	135267431	135281953	14522	NR_002934	LOC619207
100	chr10	130205988	135434178	5228190	chr10	135380437	135383462	3025	NR_033789	SPRNP1
101	chr17	53448	1824247	1770799	chr17	1628124	1641893	13769	NM_001163809	WDR81
101	chr17	53448	1824247	1770799	chr17	289770	295731	5961	NM_182705	FAM101B
101	chr17	53448	1824247	1770799	chr17	62179	202633	140454	NM_001190413	RPH3AL
101	chr17	53448	1824247	1770799	chr17	62179	202633	140454	NM_001190412	RPH3AL
101	chr17	53448	1824247	1770799	chr17	62179	202633	140454	NM_006987	RPH3AL
101	chr17	53448	1824247	1770799	chr17	180995	183279	2284	NR_040011	LOC100506388
101	chr17	53448	1824247	1770799	chr17	62179	202633	140454	NM_001190411	RPH3AL
101	chr17	53448	1824247	1770799	chr17	260117	264457	4340	NM_001013672	C17orf97
101	chr17	53448	1824247	1770799	chr17	180995	183279	2284	NM_001242780	LOC100506388
101	chr17	53448	1824247	1770799	chr17	1537151	1549083	11932	NR_028075	SCARF1
101	chr17	53448	1824247	1770799	chr17	900356	905390	5034	NM_013337	TIMM22
101	chr17	53448	1824247	1770799	chr17	635846	646075	10229	NM_024792	FAM57A
101	chr17	53448	1824247	1770799	chr17	411907	618096	206189	NM_001128159	VPS53
101	chr17	53448	1824247	1770799	chr17	435532	618096	182564	NM_018289	VPS53
101	chr17	53448	1824247	1770799	chr17	702552	767351	64799	NM_001205319	NXN
101	chr17	53448	1824247	1770799	chr17	647660	655501	7841	NM_015721	GEMIN4
101	chr17	53448	1824247	1770799	chr17	685512	695741	10229	NM_018146	RNMTL1
101	chr17	53448	1824247	1770799	chr17	662548	685571	23023	NM_016080	GLOD4
101	chr17	53448	1824247	1770799	chr17	655572	658576	3004	NR_024120	DBIL5P
101	chr17	53448	1824247	1770799	chr17	702552	882998	180446	NM_022463	NXN
101	chr17	53448	1824247	1770799	chr17	1247833	1303556	55723	NR_024058	YWHAE
101	chr17	53448	1824247	1770799	chr17	906757	1090616	183859	NM_001159746	ABR
101	chr17	53448	1824247	1770799	chr17	906757	1012340	105583	NM_001092	ABR
101	chr17	53448	1824247	1770799	chr17	906757	982386	75629	NR_046393	ABR
101	chr17	53448	1824247	1770799	chr17	906757	935078	28321	NM_001256847	ABR
101	chr17	53448	1824247	1770799	chr17	906757	1083166	176409	NM_021962	ABR
101	chr17	53448	1824247	1770799	chr17	925715	925799	84	NR_036148	MIR3183
101	chr17	53448	1824247	1770799	chr17	1182956	1204281	21325	NM_172367	TUSC5
101	chr17	53448	1824247	1770799	chr17	1173857	1174565	708	NM_001164405	BHLHA9
101	chr17	53448	1824247	1770799	chr17	1367479	1394972	27493	NM_033375	MYO1C
101	chr17	53448	1824247	1770799	chr17	1247833	1303556	55723	NM_006761	YWHAE
101	chr17	53448	1824247	1770799	chr17	1324646	1359561	34915	NM_005206	CRK
101	chr17	53448	1824247	1770799	chr17	1324646	1359561	34915	NM_016823	CRK
101	chr17	53448	1824247	1770799	chr17	1367479	1389051	21572	NM_001080950	MYO1C
101	chr17	53448	1824247	1770799	chr17	1421282	1466110	44828	NM_006224	PITPNA
101	chr17	53448	1824247	1770799	chr17	1397870	1420182	22312	NM_016532	INPP5K
101	chr17	53448	1824247	1770799	chr17	1367479	1396001	28522	NM_001080779	MYO1C
101	chr17	53448	1824247	1770799	chr17	1397870	1420182	22312	NM_130766	INPP5K
101	chr17	53448	1824247	1770799	chr17	1397870	1420182	22312	NM_001135642	INPP5K
101	chr17	53448	1824247	1770799	chr17	1420212	1421390	1178	NR_028514	PITPNA-AS1
101	chr17	53448	1824247	1770799	chr17	1537151	1549083	11932	NR_102409	SCARF1
101	chr17	53448	1824247	1770799	chr17	1477695	1532130	54435	NM_152346	SLC43A2
101	chr17	53448	1824247	1770799	chr17	1537151	1549083	11932	NM_145350	SCARF1
101	chr17	53448	1824247	1770799	chr17	1617196	1617281	85	NR_029494	MIR22
101	chr17	53448	1824247	1770799	chr17	1553922	1588176	34254	NM_006445	PRPF8
101	chr17	53448	1824247	1770799	chr17	1537151	1549083	11932	NM_003693	SCARF1
101	chr17	53448	1824247	1770799	chr17	1549444	1553392	3948	NM_031430	RILP
101	chr17	53448	1824247	1770799	chr17	1614797	1619566	4769	NR_028505	MIR22HG
101	chr17	53448	1824247	1770799	chr17	1614797	1619566	4769	NR_028504	MIR22HG
101	chr17	53448	1824247	1770799	chr17	1614797	1619566	4769	NR_028503	MIR22HG
101	chr17	53448	1824247	1770799	chr17	1614797	1619566	4769	NR_028502	MIR22HG
101	chr17	53448	1824247	1770799	chr17	1606083	1613662	7579	NM_001164407	TLCD2
101	chr17	53448	1824247	1770799	chr17	1627833	1641893	14060	NM_001163811	WDR81
101	chr17	53448	1824247	1770799	chr17	1619816	1641893	22077	NM_152348	WDR81
101	chr17	53448	1824247	1770799	chr17	1619816	1641893	22077	NM_001163673	WDR81
101	chr17	53448	1824247	1770799	chr17	1682828	1733175	50347	NM_052928	SMYD4
101	chr17	53448	1824247	1770799	chr17	1646129	1658559	12430	NM_001165921	SERPINF2
101	chr17	53448	1824247	1770799	chr17	1646129	1658559	12430	NM_000934	SERPINF2
101	chr17	53448	1824247	1770799	chr17	1646319	1658559	12240	NM_001165920	SERPINF2
101	chr17	53448	1824247	1770799	chr17	1665258	1680859	15601	NM_002615	SERPINF1
101	chr17	53448	1824247	1770799	chr17	1733272	1802848	69576	NM_002945	RPA1
102	chr17	3453794	3505143	51349	chr17	3468739	3512705	43966	NM_080704	TRPV1
102	chr17	3453794	3505143	51349	chr17	3413795	3461289	47494	NM_001258205	TRPV3
102	chr17	3453794	3505143	51349	chr17	3413795	3461289	47494	NM_145068	TRPV3
102	chr17	3453794	3505143	51349	chr17	3468739	3500336	31597	NM_018727	TRPV1
102	chr17	3453794	3505143	51349	chr17	3468739	3496171	27432	NM_080706	TRPV1
102	chr17	3453794	3505143	51349	chr17	3468739	3499125	30386	NM_080705	TRPV1
103	chr17	3507045	3558394	51349	chr17	3511555	3539616	28061	NM_013276	SHPK
103	chr17	3507045	3558394	51349	chr17	3468739	3512705	43966	NM_080704	TRPV1
103	chr17	3507045	3558394	51349	chr17	3539761	3566397	26636	NM_004937	CTNS
103	chr17	3507045	3558394	51349	chr17	3539761	3566397	26636	NM_001031681	CTNS
104	chr17	9934562	10358944	424382	chr17	9813925	10101868	287943	NM_201433	GAS7
104	chr17	9934562	10358944	424382	chr17	9813925	9940064	126139	NM_201432	GAS7
104	chr17	9934562	10358944	424382	chr17	10204182	10276322	72140	NM_003802	MYH13
104	chr17	9934562	10358944	424382	chr17	10346607	10372876	26269	NM_017533	MYH4
104	chr17	9934562	10358944	424382	chr17	10293641	10325267	31626	NM_002472	MYH8
105	chr17	12332817	13899288	1566471	chr17	12569206	12670651	101445	NM_001146312	MYOCD
105	chr17	12332817	13899288	1566471	chr17	12453284	12540504	87220	NR_034145	LINC00670
105	chr17	12332817	13899288	1566471	chr17	12453284	12540504	87220	NR_034144	LINC00670
105	chr17	12332817	13899288	1566471	chr17	12692828	12894960	202132	NM_014859	ARHGAP44
105	chr17	12332817	13899288	1566471	chr17	12569206	12670651	101445	NM_153604	MYOCD
105	chr17	12332817	13899288	1566471	chr17	12623605	12661623	38018	NM_001146313	MYOCD
105	chr17	12332817	13899288	1566471	chr17	12894928	12921381	26453	NM_173717	ELAC2
105	chr17	12332817	13899288	1566471	chr17	12894928	12921381	26453	NM_001165962	ELAC2
105	chr17	12332817	13899288	1566471	chr17	12894928	12921381	26453	NM_018127	ELAC2
105	chr17	12332817	13899288	1566471	chr17	13399005	13505244	106239	NM_006042	HS3ST3A1
106	chr17	15256488	15561130	304642	chr17	15531279	15586193	54914	NM_006470	TRIM16
106	chr17	15256488	15561130	304642	chr17	15440293	15466945	26652	NM_001135036	TVP23C
106	chr17	15256488	15561130	304642	chr17	15405577	15466945	61368	NM_145301	TVP23C
106	chr17	15256488	15561130	304642	chr17	15339331	15370925	31594	NM_001204477	CDRT4
106	chr17	15256488	15561130	304642	chr17	15339331	15466945	127614	NR_037924	TVP23C-CDRT4
106	chr17	15256488	15561130	304642	chr17	15339331	15466945	127614	NM_001204478	TVP23C-CDRT4
106	chr17	15256488	15561130	304642	chr17	15491976	15523018	31042	NM_006382	CDRT1
107	chr17	16186603	16490691	304088	chr17	16345318	16395505	50187	NM_207387	FAM211A
107	chr17	16186603	16490691	304088	chr17	16342300	16373962	31662	NR_027176	C17orf76-AS1
107	chr17	16186603	16490691	304088	chr17	16284366	16286054	1688	NM_018955	UBB
107	chr17	16186603	16490691	304088	chr17	16245847	16256812	10965	NM_181716	CENPV
107	chr17	16186603	16490691	304088	chr17	16120508	16229573	109065	NM_004278	PIGL
107	chr17	16186603	16490691	304088	chr17	16318855	16340317	21462	NM_016113	TRPV2
107	chr17	16186603	16490691	304088	chr17	16342300	16345340	3040	NR_045028	C17orf76-AS1
107	chr17	16186603	16490691	304088	chr17	16342300	16373962	31662	NR_027178	C17orf76-AS1
107	chr17	16186603	16490691	304088	chr17	16342300	16373962	31662	NR_027177	C17orf76-AS1
107	chr17	16186603	16490691	304088	chr17	16342300	16345340	3040	NR_027169	C17orf76-AS1
107	chr17	16186603	16490691	304088	chr17	16342300	16345340	3040	NR_027168	C17orf76-AS1
107	chr17	16186603	16490691	304088	chr17	16342300	16345340	3040	NR_027170	C17orf76-AS1
107	chr17	16186603	16490691	304088	chr17	16342300	16373962	31662	NR_027175	C17orf76-AS1
107	chr17	16186603	16490691	304088	chr17	16342300	16344525	2225	NR_027179	C17orf76-AS1
107	chr17	16186603	16490691	304088	chr17	16342300	16373962	31662	NR_027174	C17orf76-AS1
107	chr17	16186603	16490691	304088	chr17	16342300	16373962	31662	NR_027171	C17orf76-AS1
107	chr17	16186603	16490691	304088	chr17	16342300	16373962	31662	NR_027173	C17orf76-AS1
107	chr17	16186603	16490691	304088	chr17	16342300	16373962	31662	NR_027172	C17orf76-AS1
107	chr17	16186603	16490691	304088	chr17	16342300	16345340	3040	NR_045022	C17orf76-AS1
107	chr17	16186603	16490691	304088	chr17	16342300	16345340	3040	NR_027166	C17orf76-AS1
107	chr17	16186603	16490691	304088	chr17	16342300	16345340	3040	NR_027167	C17orf76-AS1
107	chr17	16186603	16490691	304088	chr17	16342300	16345340	3040	NR_027164	C17orf76-AS1
107	chr17	16186603	16490691	304088	chr17	16342300	16345340	3040	NR_027165	C17orf76-AS1
107	chr17	16186603	16490691	304088	chr17	16342300	16345340	3040	NR_027158	C17orf76-AS1
107	chr17	16186603	16490691	304088	chr17	16342300	16345340	3040	NR_027667	C17orf76-AS1
107	chr17	16186603	16490691	304088	chr17	16342300	16345340	3040	NR_045021	C17orf76-AS1
107	chr17	16186603	16490691	304088	chr17	16342300	16345340	3040	NR_027160	C17orf76-AS1
107	chr17	16186603	16490691	304088	chr17	16342300	16345340	3040	NR_027159	C17orf76-AS1
107	chr17	16186603	16490691	304088	chr17	16342300	16344525	2225	NR_045026	C17orf76-AS1
107	chr17	16186603	16490691	304088	chr17	16342300	16373962	31662	NR_045025	C17orf76-AS1
107	chr17	16186603	16490691	304088	chr17	16342300	16344525	2225	NR_045024	C17orf76-AS1
107	chr17	16186603	16490691	304088	chr17	16342300	16373962	31662	NR_045023	C17orf76-AS1
107	chr17	16186603	16490691	304088	chr17	16342300	16345340	3040	NR_045027	C17orf76-AS1
107	chr17	16186603	16490691	304088	chr17	16342300	16345340	3040	NR_045029	C17orf76-AS1
107	chr17	16186603	16490691	304088	chr17	16342300	16345340	3040	NR_027163	C17orf76-AS1
107	chr17	16186603	16490691	304088	chr17	16342300	16345340	3040	NR_027161	C17orf76-AS1
107	chr17	16186603	16490691	304088	chr17	16342300	16345340	3040	NR_027162	C17orf76-AS1
107	chr17	16186603	16490691	304088	chr17	16345318	16395505	50187	NM_001113567	FAM211A
107	chr17	16186603	16490691	304088	chr17	16342822	16342870	48	NR_003043	SNORD49B
107	chr17	16186603	16490691	304088	chr17	16344539	16344612	73	NR_003054	SNORD65
107	chr17	16186603	16490691	304088	chr17	16343349	16343420	71	NR_002744	SNORD49A
107	chr17	16186603	16490691	304088	chr17	16453630	16472520	18890	NM_020653	ZNF287
108	chr17	16543854	18680857	2137003	chr17	18325494	18328647	3153	NR_001443	LOC339240
108	chr17	16543854	18680857	2137003	chr17	16946073	17095962	149889	NM_201274	MPRIP
108	chr17	16543854	18680857	2137003	chr17	16593638	16678311	84673	NM_014695	CCDC144A
108	chr17	16543854	18680857	2137003	chr17	16524047	16557167	33120	NM_020787	ZNF624
108	chr17	16543854	18680857	2137003	chr17	16842397	16875402	33005	NM_012452	TNFRSF13B
108	chr17	16543854	18680857	2137003	chr17	16733796	16736147	2351	NR_029392	KRT16P2
108	chr17	16543854	18680857	2137003	chr17	16692056	16693815	1759	NR_026810	FAM106CP
108	chr17	16543854	18680857	2137003	chr17	16690205	16707819	17614	NR_003190	USP32P1
108	chr17	16543854	18680857	2137003	chr17	18281078	18292960	11882	NM_001145127	EVPLL
108	chr17	16543854	18680857	2137003	chr17	16946073	17095962	149889	NM_015134	MPRIP
108	chr17	16543854	18680857	2137003	chr17	17942610	17971718	29108	NM_024052	GID4
108	chr17	16543854	18680857	2137003	chr17	17206679	17250977	44298	NM_020201	NT5M
108	chr17	16543854	18680857	2137003	chr17	17149937	17184012	34075	NM_001199125	COPS3
108	chr17	16543854	18680857	2137003	chr17	17104308	17109646	5338	NM_178836	PLD6
108	chr17	16543854	18680857	2137003	chr17	17124484	17140502	16018	NM_144606	FLCN
108	chr17	16543854	18680857	2137003	chr17	17115526	17140502	24976	NM_144997	FLCN
108	chr17	16543854	18680857	2137003	chr17	17149937	17184617	34680	NM_003653	COPS3
108	chr17	16543854	18680857	2137003	chr17	17584786	17714765	129979	NM_030665	RAI1
108	chr17	16543854	18680857	2137003	chr17	17408876	17480779	71903	NM_148173	PEMT
108	chr17	16543854	18680857	2137003	chr17	17408876	17485745	76869	NM_007169	PEMT
108	chr17	16543854	18680857	2137003	chr17	17380299	17396534	16235	NM_018019	MED9
108	chr17	16543854	18680857	2137003	chr17	17322657	17326728	4071	NM_001243312	SMCR9
108	chr17	16543854	18680857	2137003	chr17	17397752	17399709	1957	NM_016084	RASD1
108	chr17	16543854	18680857	2137003	chr17	17397752	17399709	1957	NM_001199989	RASD1
108	chr17	16543854	18680857	2137003	chr17	17408876	17495017	86141	NM_148172	PEMT
108	chr17	16543854	18680857	2137003	chr17	17408876	17495017	86141	NM_001267552	PEMT
108	chr17	16543854	18680857	2137003	chr17	17408876	17495017	86141	NM_001267551	PEMT
108	chr17	16543854	18680857	2137003	chr17	17717149	17717245	96	NR_030361	MIR33B
108	chr17	16543854	18680857	2137003	chr17	17714662	17740325	25663	NM_001005291	SREBF1
108	chr17	16543854	18680857	2137003	chr17	17714662	17740325	25663	NM_004176	SREBF1
108	chr17	16543854	18680857	2137003	chr17	17679999	17682843	2844	NR_024007	SMCR5
108	chr17	16543854	18680857	2137003	chr17	17876126	17911142	35016	NM_001130092	LRRC48
108	chr17	16543854	18680857	2137003	chr17	17746821	17875784	128963	NM_001033551	TOM1L2
108	chr17	16543854	18680857	2137003	chr17	17876126	17920189	44063	NM_001130090	LRRC48
108	chr17	16543854	18680857	2137003	chr17	17746821	17875784	128963	NM_001082968	TOM1L2
108	chr17	16543854	18680857	2137003	chr17	17876126	17911142	35016	NM_001130091	LRRC48
108	chr17	16543854	18680857	2137003	chr17	17876126	17920189	44063	NM_031294	LRRC48
108	chr17	16543854	18680857	2137003	chr17	17921333	17942480	21147	NM_145691	ATPAF2
108	chr17	16543854	18680857	2137003	chr17	18148130	18162230	14100	NM_002018	FLII
108	chr17	16543854	18680857	2137003	chr17	17991180	18011299	20119	NM_001388	DRG2
108	chr17	16543854	18680857	2137003	chr17	18086866	18113267	26401	NM_017758	ALKBH5
108	chr17	16543854	18680857	2137003	chr17	18012019	18083116	71097	NM_016239	MYO15A
108	chr17	16543854	18680857	2137003	chr17	18148130	18162230	14100	NM_001256265	FLII
108	chr17	16543854	18680857	2137003	chr17	18128935	18148188	19253	NM_004140	LLGL1
108	chr17	16543854	18680857	2137003	chr17	18218593	18231370	12777	NM_144775	SMCR8
108	chr17	16543854	18680857	2137003	chr17	18163847	18169095	5248	NM_139162	SMCR7
108	chr17	16543854	18680857	2137003	chr17	18148130	18161870	13740	NM_001256264	FLII
108	chr17	16543854	18680857	2137003	chr17	18163847	18169095	5248	NM_001144900	SMCR7
108	chr17	16543854	18680857	2137003	chr17	18164423	18169095	4672	NM_148886	SMCR7
108	chr17	16543854	18680857	2137003	chr17	18177234	18218321	41087	NM_004618	TOP3A
108	chr17	16543854	18680857	2137003	chr17	18231186	18266856	35670	NM_004169	SHMT1
108	chr17	16543854	18680857	2137003	chr17	18231186	18266856	35670	NM_148918	SHMT1
108	chr17	16543854	18680857	2137003	chr17	18647325	18682662	35337	NM_001267585	FBXW10
108	chr17	16543854	18680857	2137003	chr17	18427879	18430160	2281	NR_026809	FAM106A
108	chr17	16543854	18680857	2137003	chr17	18343221	18346208	2987	NR_073414	KRT16P1
108	chr17	16543854	18680857	2137003	chr17	18380098	18398259	18161	NM_001040078	LGALS9C
108	chr17	16543854	18680857	2137003	chr17	18414575	18424566	9991	NR_003554	USP32P2
108	chr17	16543854	18680857	2137003	chr17	18561741	18585572	23831	NM_001145045	ZNF286B
108	chr17	16543854	18680857	2137003	chr17	18538841	18547740	8899	NM_001039397	TBC1D28
108	chr17	16543854	18680857	2137003	chr17	18441114	18528930	87816	NR_036647	CCDC144B
108	chr17	16543854	18680857	2137003	chr17	18569235	18576494	7259	NR_026718	FOXO3B
108	chr17	16543854	18680857	2137003	chr17	18625401	18639431	14030	NM_001037330	TRIM16L
108	chr17	16543854	18680857	2137003	chr17	18647325	18682662	35337	NR_051988	FBXW10
108	chr17	16543854	18680857	2137003	chr17	18647325	18682662	35337	NM_001267586	FBXW10
109	chr17	18716654	19431280	714626	chr17	19286754	19290532	3778	NM_002404	MFAP4
109	chr17	18716654	19431280	714626	chr17	18855477	18924004	68527	NM_001270648	SLC5A10
109	chr17	18716654	19431280	714626	chr17	18761380	18834599	73219	NM_002767	PRPSAP2
109	chr17	18716654	19431280	714626	chr17	18761380	18834599	73219	NM_001243941	PRPSAP2
109	chr17	18716654	19431280	714626	chr17	18759611	18834599	74988	NM_001243942	PRPSAP2
109	chr17	18716654	19431280	714626	chr17	18759611	18834599	74988	NM_001243936	PRPSAP2
109	chr17	18716654	19431280	714626	chr17	18853988	18924004	70016	NR_073067	SLC5A10
109	chr17	18716654	19431280	714626	chr17	18768781	18834599	65818	NM_001243940	PRPSAP2
109	chr17	18716654	19431280	714626	chr17	18855477	18924004	68527	NM_001270649	SLC5A10
109	chr17	18716654	19431280	714626	chr17	18923989	18950336	26347	NM_006613	GRAP
109	chr17	18716654	19431280	714626	chr17	18855477	18924004	68527	NM_152351	SLC5A10
109	chr17	18716654	19431280	714626	chr17	18855477	18924004	68527	NM_001042450	SLC5A10
109	chr17	18716654	19431280	714626	chr17	18874380	18908060	33680	NM_001039999	FAM83G
109	chr17	18716654	19431280	714626	chr17	19030781	19062148	31367	NM_001129778	GRAPL
109	chr17	18716654	19431280	714626	chr17	19140689	19240028	99339	NM_001102664	EPN2
109	chr17	18716654	19431280	714626	chr17	19140689	19240028	99339	NM_148921	EPN2
109	chr17	18716654	19431280	714626	chr17	19140689	19240028	99339	NM_014964	EPN2
109	chr17	18716654	19431280	714626	chr17	19247818	19247887	69	NR_031591	MIR1180
109	chr17	18716654	19431280	714626	chr17	19174705	19177701	2996	NR_046824	EPN2-IT1
109	chr17	18716654	19431280	714626	chr17	19240866	19281495	40629	NM_001243475	B9D1
109	chr17	18716654	19431280	714626	chr17	19199908	19209574	9666	NR_048576	EPN2-AS1
109	chr17	18716654	19431280	714626	chr17	19246482	19266046	19564	NM_001243473	B9D1
109	chr17	18716654	19431280	714626	chr17	19246482	19266046	19564	NM_015681	B9D1
109	chr17	18716654	19431280	714626	chr17	19286754	19290532	3778	NM_001198695	MFAP4
109	chr17	18716654	19431280	714626	chr17	19281773	19286857	5084	NM_139034	MAPK7
109	chr17	18716654	19431280	714626	chr17	19281773	19286857	5084	NM_002749	MAPK7
109	chr17	18716654	19431280	714626	chr17	19281033	19286857	5824	NM_139033	MAPK7
109	chr17	18716654	19431280	714626	chr17	19281033	19286857	5824	NM_139032	MAPK7
109	chr17	18716654	19431280	714626	chr17	19314490	19320589	6099	NM_007148	RNF112
110	chr17	19455859	19476708	20849	chr17	19460872	19461024	152	NR_003025	SNORA59A
110	chr17	19455859	19476708	20849	chr17	19437166	19482346	45180	NM_018242	SLC47A1
110	chr17	19455859	19476708	20849	chr17	19460872	19461024	152	NR_003022	SNORA59B
111	chr17	21191517	21228002	36485	chr17	21187967	21218551	30584	NM_145109	MAP2K3
111	chr17	21191517	21228002	36485	chr17	21191347	21218551	27204	NM_002756	MAP2K3
112	chr17	21250924	21287409	36485	chr17	21279698	21323179	43481	NM_021012	KCNJ12
113	chr17	21429827	21447332	17505	chr17	21431570	21454941	23371	NM_001113434	C17orf51
114	chr17	21471896	22408962	937066	chr17	22022436	22023991	1555	NM_001190452	MTRNR2L1
114	chr17	21471896	22408962	937066	chr17	21825369	21826499	1130	NR_028336	FAM27L
114	chr17	21471896	22408962	937066	chr17	21904061	21913070	9009	NR_027084	FLJ36000
115	chr17	26571445	26831890	260445	chr17	26655350	26662515	7165	NM_174887	IFT20
115	chr17	26571445	26831890	260445	chr17	26646120	26655711	9591	NM_014573	TMEM97
115	chr17	26571445	26831890	260445	chr17	26603011	26634408	31397	NR_028334	KRT18P55
115	chr17	26571445	26831890	260445	chr17	26574469	26575315	846	NR_002181	PPY2
115	chr17	26571445	26831890	260445	chr17	26655350	26662515	7165	NM_001267778	IFT20
115	chr17	26571445	26831890	260445	chr17	26655350	26662515	7165	NM_001267777	IFT20
115	chr17	26571445	26831890	260445	chr17	26655350	26662515	7165	NM_001267774	IFT20
115	chr17	26571445	26831890	260445	chr17	26655350	26662515	7165	NM_001267775	IFT20
115	chr17	26571445	26831890	260445	chr17	26655350	26662515	7165	NM_001267776	IFT20
115	chr17	26571445	26831890	260445	chr17	26698986	26728065	29079	NM_015077	SARM1
115	chr17	26571445	26831890	260445	chr17	26684686	26689089	4403	NM_152464	TMEM199
115	chr17	26571445	26831890	260445	chr17	26673658	26684603	10945	NM_015584	POLDIP2
115	chr17	26571445	26831890	260445	chr17	26662547	26674035	11488	NM_021137	TNFAIP1
115	chr17	26571445	26831890	260445	chr17	26687676	26687757	81	NR_039875	MIR4723
115	chr17	26571445	26831890	260445	chr17	26691289	26692265	976	NM_001080837	SEBOX
115	chr17	26571445	26831890	260445	chr17	26694298	26697373	3075	NM_000638	VTN
115	chr17	26571445	26831890	260445	chr17	26721660	26733230	11570	NM_001242366	SLC46A1
115	chr17	26571445	26831890	260445	chr17	26721660	26733230	11570	NM_080669	SLC46A1
115	chr17	26571445	26831890	260445	chr17	26800663	26824798	24135	NM_003984	SLC13A2
115	chr17	26571445	26831890	260445	chr17	26800663	26824798	24135	NM_001145975	SLC13A2
115	chr17	26571445	26831890	260445	chr17	26800663	26824798	24135	NR_027384	SLC13A2
116	chr17	27983761	28049600	65839	chr17	27952964	28257018	304054	NM_033389	SSH2
117	chr17	28986871	29961663	974792	chr17	29036625	29097068	60443	NR_024187	SUZ12P1
117	chr17	28986871	29961663	974792	chr17	29643427	29648767	5340	NM_001003927	EVI2A
117	chr17	28986871	29961663	974792	chr17	29421944	29549782	127838	NM_001128147	NF1
117	chr17	28986871	29961663	974792	chr17	29421944	29704695	282751	NM_001042492	NF1
117	chr17	28986871	29961663	974792	chr17	29421367	29421443	76	NR_039886	MIR4733
117	chr17	28986871	29961663	974792	chr17	29226000	29233286	7286	NM_024683	TEFM
117	chr17	28986871	29961663	974792	chr17	29159022	29222295	63273	NM_024857	ATAD5
117	chr17	28986871	29961663	974792	chr17	29109701	29151778	42077	NM_015986	CRLF3
117	chr17	28986871	29961663	974792	chr17	29109701	29151778	42077	NR_073118	CRLF3
117	chr17	28986871	29961663	974792	chr17	29297955	29326929	28974	NM_001184992	RNF135
117	chr17	28986871	29961663	974792	chr17	29248753	29286211	37458	NM_018404	ADAP2
117	chr17	28986871	29961663	974792	chr17	29297955	29326927	28972	NM_032322	RNF135
117	chr17	28986871	29961663	974792	chr17	29297955	29326927	28972	NM_197939	RNF135
117	chr17	28986871	29961663	974792	chr17	29302352	29303017	665	NR_002221	DPRXP4
117	chr17	28986871	29961663	974792	chr17	29421944	29704695	282751	NM_000267	NF1
117	chr17	28986871	29961663	974792	chr17	29621667	29624380	2713	NM_002544	OMG
117	chr17	28986871	29961663	974792	chr17	29630787	29641130	10343	NM_006495	EVI2B
117	chr17	28986871	29961663	974792	chr17	29643427	29648767	5340	NM_014210	EVI2A
117	chr17	28986871	29961663	974792	chr17	29887014	29887102	88	NR_029710	MIR193A
117	chr17	28986871	29961663	974792	chr17	29718641	29865232	146591	NM_032932	RAB11FIP4
117	chr17	28986871	29961663	974792	chr17	29861900	29861989	89	NR_039877	MIR4724
117	chr17	28986871	29961663	974792	chr17	29902429	29902540	111	NR_029856	MIR365B
117	chr17	28986871	29961663	974792	chr17	29902287	29902377	90	NR_039878	MIR4725
118	chr17	31474517	33262814	1788297	chr17	32683470	32685629	2159	NM_005408	CCL13
118	chr17	31474517	33262814	1788297	chr17	32582295	32584220	1925	NM_002982	CCL2
118	chr17	31474517	33262814	1788297	chr17	31340105	32483825	1143720	NM_001094	ASIC2
118	chr17	31474517	33262814	1788297	chr17	31340105	31620006	279901	NM_183377	ASIC2
118	chr17	31474517	33262814	1788297	chr17	31856805	31860779	3974	NR_037584	AA06
118	chr17	31474517	33262814	1788297	chr17	32612686	32615199	2513	NM_002986	CCL11
118	chr17	31474517	33262814	1788297	chr17	32597234	32599261	2027	NM_006273	CCL7
118	chr17	31474517	33262814	1788297	chr17	32646065	32648421	2356	NM_005623	CCL8
118	chr17	31474517	33262814	1788297	chr17	32901141	32906388	5247	NM_207454	C17orf102
118	chr17	31474517	33262814	1788297	chr17	32687398	32690252	2854	NM_002981	CCL1
118	chr17	31474517	33262814	1788297	chr17	33254877	33288528	33651	NM_001193529	CCT6B
118	chr17	31474517	33262814	1788297	chr17	32907767	32966337	58570	NM_207313	TMEM132E
118	chr17	31474517	33262814	1788297	chr17	33254877	33288528	33651	NM_001193530	CCT6B
118	chr17	31474517	33262814	1788297	chr17	33254877	33288528	33651	NM_006584	CCT6B
119	chr17	34450404	36188701	1738297	chr17	35441926	35766902	324976	NM_198839	ACACA
119	chr17	34450404	36188701	1738297	chr17	34538467	34540274	1807	NM_001001435	CCL4L1
119	chr17	34450404	36188701	1738297	chr17	34493060	34503988	10928	NM_001001417	TBC1D3B
119	chr17	34450404	36188701	1738297	chr17	34522267	34524147	1880	NM_001001437	CCL3L3
119	chr17	34450404	36188701	1738297	chr17	34522267	34524156	1889	NM_021006	CCL3L1
119	chr17	34450404	36188701	1738297	chr17	34640033	34641840	1807	NM_001001435	CCL4L1
119	chr17	34450404	36188701	1738297	chr17	34623841	34625730	1889	NM_021006	CCL3L1
119	chr17	34450404	36188701	1738297	chr17	34581084	34592032	10948	NM_001001418	TBC1D3C
119	chr17	34450404	36188701	1738297	chr17	34538467	34540274	1807	NM_207007	CCL4L2
119	chr17	34450404	36188701	1738297	chr17	34623841	34625721	1880	NM_001001437	CCL3L3
119	chr17	34450404	36188701	1738297	chr17	34900736	34946276	45540	NM_024835	GGNBP2
119	chr17	34450404	36188701	1738297	chr17	34851598	34891305	39707	NM_001163735	MYO19
119	chr17	34450404	36188701	1738297	chr17	34842472	34851662	9190	NM_004773	ZNHIT3
119	chr17	34450404	36188701	1738297	chr17	34745935	34757050	11115	NM_001123392	TBC1D3H
119	chr17	34450404	36188701	1738297	chr17	34640033	34641840	1807	NM_207007	CCL4L2
119	chr17	34450404	36188701	1738297	chr17	34797174	34808103	10929	NM_001040282	TBC1D3G
119	chr17	34450404	36188701	1738297	chr17	34851598	34891305	39707	NM_025109	MYO19
119	chr17	34450404	36188701	1738297	chr17	34891402	34895150	3748	NM_178517	PIGW
119	chr17	34450404	36188701	1738297	chr17	34868916	34891305	22389	NM_001033580	MYO19
119	chr17	34450404	36188701	1738297	chr17	35441926	35656692	214766	NM_198838	ACACA
119	chr17	34450404	36188701	1738297	chr17	35391041	35391110	69	NR_036056	MIR2909
119	chr17	34450404	36188701	1738297	chr17	34958024	34965407	7383	NM_024864	MRM1
119	chr17	34450404	36188701	1738297	chr17	34948225	34957233	9008	NM_024308	DHRS11
119	chr17	34450404	36188701	1738297	chr17	35306174	35414171	107997	NM_012138	AATF
119	chr17	34450404	36188701	1738297	chr17	35294771	35301915	7144	NM_005568	LHX1
119	chr17	34450404	36188701	1738297	chr17	35441926	35656692	214766	NM_198837	ACACA
119	chr17	34450404	36188701	1738297	chr17	35767311	35837226	69915	NM_001488	TADA2A
119	chr17	34450404	36188701	1738297	chr17	35732984	35749662	16678	NM_173625	C17orf78
119	chr17	34450404	36188701	1738297	chr17	35441926	35716059	274133	NM_198836	ACACA
119	chr17	34450404	36188701	1738297	chr17	35441926	35766902	324976	NM_198834	ACACA
119	chr17	34450404	36188701	1738297	chr17	35766976	35837226	70250	NM_001166105	TADA2A
119	chr17	34450404	36188701	1738297	chr17	35767311	35825757	58446	NM_133439	TADA2A
119	chr17	34450404	36188701	1738297	chr17	35874899	35969486	94587	NM_001163545	SYNRG
119	chr17	34450404	36188701	1738297	chr17	35874899	35969486	94587	NM_198882	SYNRG
119	chr17	34450404	36188701	1738297	chr17	35874899	35969486	94587	NM_080550	SYNRG
119	chr17	34450404	36188701	1738297	chr17	35874899	35969486	94587	NM_007247	SYNRG
119	chr17	34450404	36188701	1738297	chr17	35849950	35873588	23638	NM_007026	DUSP14
119	chr17	34450404	36188701	1738297	chr17	35874899	35969486	94587	NM_001163547	SYNRG
119	chr17	34450404	36188701	1738297	chr17	35972362	36003493	31131	NM_007010	DDX52
119	chr17	34450404	36188701	1738297	chr17	35874899	35969486	94587	NM_001163546	SYNRG
119	chr17	34450404	36188701	1738297	chr17	35874899	35969486	94587	NM_001163544	SYNRG
119	chr17	34450404	36188701	1738297	chr17	36046433	36105096	58663	NM_000458	HNF1B
119	chr17	34450404	36188701	1738297	chr17	36046433	36105096	58663	NM_001165923	HNF1B
120	chr17	37892843	38054482	161639	chr17	37913967	38020441	106474	NR_047559	IKZF3
120	chr17	37892843	38054482	161639	chr17	37894161	37903538	9377	NM_005310	GRB7
120	chr17	37892843	38054482	161639	chr17	37895023	37903538	8515	NM_001242442	GRB7
120	chr17	37892843	38054482	161639	chr17	37894575	37903538	8963	NM_001030002	GRB7
120	chr17	37892843	38054482	161639	chr17	37896219	37903538	7319	NM_001242443	GRB7
120	chr17	37892843	38054482	161639	chr17	37913967	37934478	20511	NR_047561	IKZF3
120	chr17	37892843	38054482	161639	chr17	37913967	38020441	106474	NM_183229	IKZF3
120	chr17	37892843	38054482	161639	chr17	37913967	38020441	106474	NM_012481	IKZF3
120	chr17	37892843	38054482	161639	chr17	37913967	38020441	106474	NM_001257410	IKZF3
120	chr17	37892843	38054482	161639	chr17	37913967	38020441	106474	NM_183232	IKZF3
120	chr17	37892843	38054482	161639	chr17	37913967	38020441	106474	NM_001257414	IKZF3
120	chr17	37892843	38054482	161639	chr17	37913967	38020441	106474	NR_047560	IKZF3
120	chr17	37892843	38054482	161639	chr17	37913967	38020441	106474	NM_001257413	IKZF3
120	chr17	37892843	38054482	161639	chr17	37913967	38020441	106474	NM_001257412	IKZF3
120	chr17	37892843	38054482	161639	chr17	37913967	38020441	106474	NM_001257411	IKZF3
120	chr17	37892843	38054482	161639	chr17	37913967	38020441	106474	NM_183230	IKZF3
120	chr17	37892843	38054482	161639	chr17	37913967	38020441	106474	NM_001257409	IKZF3
120	chr17	37892843	38054482	161639	chr17	37913967	38020441	106474	NM_001257408	IKZF3
120	chr17	37892843	38054482	161639	chr17	37913967	38020441	106474	NM_183228	IKZF3
120	chr17	37892843	38054482	161639	chr17	38024454	38034149	9695	NM_199321	ZPBP2
120	chr17	37892843	38054482	161639	chr17	37913967	38020441	106474	NM_183231	IKZF3
120	chr17	37892843	38054482	161639	chr17	38024454	38034149	9695	NM_198844	ZPBP2
121	chr17	40764398	40800956	36558	chr17	40761357	40767256	5899	NM_001070	TUBG1
122	chr17	41131964	41314862	182898	chr17	41102542	41132020	29478	NM_025267	PTGES3L-AARSD1
122	chr17	41131964	41314862	182898	chr17	41196311	41276132	79821	NM_007298	BRCA1
122	chr17	41131964	41314862	182898	chr17	41102542	41132545	30003	NM_001136042	PTGES3L-AARSD1
122	chr17	41131964	41314862	182898	chr17	41120104	41132545	12441	NM_001142653	PTGES3L
122	chr17	41131964	41314862	182898	chr17	41120104	41132545	12441	NM_001261430	PTGES3L
122	chr17	41131964	41314862	182898	chr17	41120104	41132545	12441	NM_001142654	PTGES3L
122	chr17	41131964	41314862	182898	chr17	41166621	41174459	7838	NM_006373	VAT1
122	chr17	41131964	41314862	182898	chr17	41158741	41166476	7735	NM_005533	IFI35
122	chr17	41131964	41314862	182898	chr17	41150445	41154971	4526	NM_000988	RPL27
122	chr17	41131964	41314862	182898	chr17	41132581	41145707	13126	NM_173079	RUNDC1
122	chr17	41131964	41314862	182898	chr17	41177257	41184058	6801	NM_005440	RND2
122	chr17	41131964	41314862	182898	chr17	41196311	41277468	81157	NM_007297	BRCA1
122	chr17	41131964	41314862	182898	chr17	41196311	41277500	81189	NM_007294	BRCA1
122	chr17	41131964	41314862	182898	chr17	41196311	41277500	81189	NM_007300	BRCA1
122	chr17	41131964	41314862	182898	chr17	41196311	41277340	81029	NR_027676	BRCA1
122	chr17	41131964	41314862	182898	chr17	41277599	41297125	19526	NR_003108	NBR2
122	chr17	41131964	41314862	182898	chr17	41196311	41277468	81157	NM_007299	BRCA1
123	chr17	41487912	42179520	691608	chr17	41952726	41985113	32387	NM_005374	MPP2
123	chr17	41487912	42179520	691608	chr17	41522173	41522253	80	NR_031751	MIR2117
123	chr17	41487912	42179520	691608	chr17	41605210	41623800	18590	NM_001079675	ETV4
123	chr17	41487912	42179520	691608	chr17	41605210	41623305	18095	NM_001261438	ETV4
123	chr17	41487912	42179520	691608	chr17	41561333	41601680	40347	NM_004941	DHX8
123	chr17	41487912	42179520	691608	chr17	41605210	41607803	2593	NM_001261439	ETV4
123	chr17	41487912	42179520	691608	chr17	41831098	41836156	5058	NM_025237	SOST
123	chr17	41487912	42179520	691608	chr17	41717757	41739262	21505	NM_001040002	MEOX1
123	chr17	41487912	42179520	691608	chr17	41605210	41623305	18095	NM_001986	ETV4
123	chr17	41487912	42179520	691608	chr17	41605210	41623800	18590	NM_001261437	ETV4
123	chr17	41487912	42179520	691608	chr17	41717757	41738931	21174	NM_004527	MEOX1
123	chr17	41487912	42179520	691608	chr17	41717757	41738931	21174	NM_013999	MEOX1
123	chr17	41487912	42179520	691608	chr17	41924515	41935602	11087	NM_001168322	CD300LG
[truncated: 8,426 more rows]

## Sheet: Stefansson et al
Merged.CNV.ID	CNV.Chr	CNV.Start	CNV.End	CNV.Size	TX.Chr	TX.Start	TX.End	TX.Length	Accession	GeneSymbol
1	chr7	149081	295765	146684	chr7	288051	304059	16008	NM_020223	FAM20C
2	chr7	5050267	5190933	140666	chr7	5052078	5075645	23567	NM_021163	RBAK
2	chr7	5050267	5190933	140666	chr7	5051977	5075645	23668	NM_001204456	RBAK
2	chr7	5050267	5190933	140666	chr7	5051977	5079380	27403	NM_001204513	RBAK-LOC389458
2	chr7	5050267	5190933	140666	chr7	5127466	5150703	23237	NR_034163	ZNF890P
2	chr7	5050267	5190933	140666	chr7	5078216	5079380	1164	NR_015343	LOC389458
3	chr7	5229720	5653268	423548	chr7	5220425	5240012	19587	NM_001033520	WIPI2
3	chr7	5229720	5653268	423548	chr7	5196360	5240012	43652	NM_016003	WIPI2
3	chr7	5229720	5653268	423548	chr7	5196360	5240012	43652	NM_015610	WIPI2
3	chr7	5229720	5653268	423548	chr7	5196360	5240012	43652	NM_001033518	WIPI2
3	chr7	5229720	5653268	423548	chr7	5196360	5240012	43652	NM_001033519	WIPI2
3	chr7	5229720	5653268	423548	chr7	5626197	5787887	161690	NM_207111	RNF216
3	chr7	5229720	5653268	423548	chr7	5289086	5310230	21144	NM_001040661	SLC29A4
3	chr7	5229720	5653268	423548	chr7	5289086	5310230	21144	NM_153247	SLC29A4
3	chr7	5229720	5653268	423548	chr7	5501975	5502074	99	NR_030318	MIR589
3	chr7	5229720	5653268	423548	chr7	5481953	5519925	37972	NM_024963	FBXL18
3	chr7	5229720	5653268	423548	chr7	5312948	5429703	116755	NM_001080495	TNRC18
3	chr7	5229720	5653268	423548	chr7	5598961	5612813	13852	NM_003088	FSCN1
3	chr7	5229720	5653268	423548	chr7	5533304	5536758	3454	NM_001101	ACTB
3	chr7	5229720	5653268	423548	chr7	5626197	5787887	161690	NM_207116	RNF216
4	chr7	15609872	16251148	641276	chr7	16216635	16276754	60119	NR_038946	LOC100506025
4	chr7	15609872	16251148	641276	chr7	15617361	15692833	75472	NM_005924	MEOX2
4	chr7	15609872	16251148	641276	chr7	16216635	16276754	60119	NR_038947	LOC100506025
4	chr7	15609872	16251148	641276	chr7	16093676	16427472	333796	NM_001101426	ISPD
4	chr7	15609872	16251148	641276	chr7	16093676	16427472	333796	NM_001101417	ISPD
5	chr7	57212608	57659300	446692	chr7	57237318	57251805	14487	NR_030766	GUSBP10
5	chr7	57212608	57659300	446692	chr7	57513824	57537207	23383	NM_001159279	ZNF716
5	chr7	57212608	57659300	446692	chr7	57476672	57476738	66	NR_036102	MIR3147
6	chr7	72388281	73777987	1389706	chr7	73262022	73282100	20078	NM_014146	LAT2
6	chr7	72388281	73777987	1389706	chr7	72720109	72724376	4267	NM_001077621	VPS37D
6	chr7	72388281	73777987	1389706	chr7	72486044	72488386	2342	NM_003508	FZD9
6	chr7	72388281	73777987	1389706	chr7	72380235	72410577	30342	NM_003602	FKBP6
6	chr7	72388281	73777987	1389706	chr7	72380090	72410577	30487	NM_001135211	FKBP6
6	chr7	72388281	73777987	1389706	chr7	72588618	72610001	21383	NM_001197244	BCL7B
6	chr7	72388281	73777987	1389706	chr7	72492663	72574551	81888	NM_032408	BAZ1B
6	chr7	72388281	73777987	1389706	chr7	72588618	72610001	21383	NM_001707	BCL7B
6	chr7	72388281	73777987	1389706	chr7	72645459	72676806	31347	NM_032951	MLXIPL
6	chr7	72388281	73777987	1389706	chr7	72588618	72609538	20920	NR_036682	BCL7B
6	chr7	72388281	73777987	1389706	chr7	72621209	72630949	9740	NM_012453	TBL2
6	chr7	72388281	73777987	1389706	chr7	72645459	72676806	31347	NM_032954	MLXIPL
6	chr7	72388281	73777987	1389706	chr7	72645459	72676806	31347	NM_032952	MLXIPL
6	chr7	72388281	73777987	1389706	chr7	72645459	72676806	31347	NM_032953	MLXIPL
6	chr7	72388281	73777987	1389706	chr7	73080362	73122172	41810	NM_000501	ELN
6	chr7	72388281	73777987	1389706	chr7	72886857	72894791	7934	NM_152559	WBSCR27
6	chr7	72388281	73777987	1389706	chr7	72735833	72750487	14654	NR_045512	WBSCR22
6	chr7	72388281	73777987	1389706	chr7	72735833	72750487	14654	NR_037776	WBSCR22
6	chr7	72388281	73777987	1389706	chr7	72735833	72750487	14654	NM_017528	WBSCR22
6	chr7	72388281	73777987	1389706	chr7	72733183	72735717	2534	NM_032317	DNAJC30
6	chr7	72388281	73777987	1389706	chr7	72735833	72750487	14654	NM_001202560	WBSCR22
6	chr7	72388281	73777987	1389706	chr7	72788362	72791126	2764	NR_026912	ABHD11
6	chr7	72388281	73777987	1389706	chr7	72788362	72791120	2758	NM_148913	ABHD11
6	chr7	72388281	73777987	1389706	chr7	72788360	72791120	2760	NM_001145364	ABHD11
6	chr7	72388281	73777987	1389706	chr7	72751470	72771953	20483	NM_004603	STX1A
6	chr7	72388281	73777987	1389706	chr7	72751470	72771953	20483	NM_001165903	STX1A
6	chr7	72388281	73777987	1389706	chr7	72763582	72763663	81	NR_036247	MIR4284
6	chr7	72388281	73777987	1389706	chr7	72787334	72788266	932	NR_026690	LINC00035
6	chr7	72388281	73777987	1389706	chr7	72788362	72791120	2758	NR_026910	ABHD11
6	chr7	72388281	73777987	1389706	chr7	72788362	72791120	2758	NM_148912	ABHD11
6	chr7	72388281	73777987	1389706	chr7	72821262	72822536	1274	NM_001306	CLDN3
6	chr7	72388281	73777987	1389706	chr7	72883128	72884951	1823	NM_001305	CLDN4
6	chr7	72388281	73777987	1389706	chr7	72913424	72918159	4735	NM_182504	WBSCR28
6	chr7	72388281	73777987	1389706	chr7	73080362	73122172	41810	NM_001081753	ELN
6	chr7	72388281	73777987	1389706	chr7	73080362	73122172	41810	NM_001081755	ELN
6	chr7	72388281	73777987	1389706	chr7	73080362	73122172	41810	NM_001081754	ELN
6	chr7	72388281	73777987	1389706	chr7	73080362	73122172	41810	NM_001081752	ELN
6	chr7	72388281	73777987	1389706	chr7	73226641	73249365	22724	NM_022170	EIF4H
6	chr7	72388281	73777987	1389706	chr7	73226641	73249365	22724	NM_031992	EIF4H
6	chr7	72388281	73777987	1389706	chr7	73136042	73174791	38749	NM_002314	LIMK1
6	chr7	72388281	73777987	1389706	chr7	73145421	73174791	29370	NM_001204426	LIMK1
6	chr7	72388281	73777987	1389706	chr7	73243463	73243560	97	NR_030321	MIR590
6	chr7	72388281	73777987	1389706	chr7	73283767	73306674	22907	NM_181471	RFC2
6	chr7	72388281	73777987	1389706	chr7	73283767	73306674	22907	NM_002914	RFC2
6	chr7	72388281	73777987	1389706	chr7	73262022	73282100	20078	NM_032464	LAT2
6	chr7	72388281	73777987	1389706	chr7	73262022	73282100	20078	NM_032463	LAT2
6	chr7	72388281	73777987	1389706	chr7	73506055	73654856	148801	NM_016328	GTF2IRD1
6	chr7	72388281	73777987	1389706	chr7	73341740	73458209	116469	NM_003388	CLIP2
6	chr7	72388281	73777987	1389706	chr7	73341740	73458209	116469	NM_032421	CLIP2
6	chr7	72388281	73777987	1389706	chr7	73709965	73812958	102993	NM_001518	GTF2I
6	chr7	72388281	73777987	1389706	chr7	73506055	73654856	148801	NM_001199207	GTF2IRD1
6	chr7	72388281	73777987	1389706	chr7	73506055	73654856	148801	NM_005685	GTF2IRD1
6	chr7	72388281	73777987	1389706	chr7	73709965	73812958	102993	NM_032999	GTF2I
6	chr7	72388281	73777987	1389706	chr7	73709965	73812958	102993	NM_001163636	GTF2I
6	chr7	72388281	73777987	1389706	chr7	73709965	73812958	102993	NM_033000	GTF2I
6	chr7	72388281	73777987	1389706	chr7	73709965	73812958	102993	NM_033001	GTF2I
7	chr7	83887393	85199723	1312330	chr7	84462807	84589183	126376	NM_152754	SEMA3D
8	chr7	146077700	147445123	1367423	chr7	146274840	146274860	20	NR_049838	MIR548AQ
8	chr7	146077700	147445123	1367423	chr7	145444385	147749021	2304636	NM_014141	CNTNAP2
8	chr7	146077700	147445123	1367423	chr7	146274840	146274860	20	NR_049839	MIR548AR
8	chr7	146077700	147445123	1367423	chr7	146706041	146706146	105	NR_031645	MIR548F4
8	chr7	146077700	147445123	1367423	chr7	147257617	147674860	417243	NR_036093	MIR548T
9	chr7	157553706	158812247	1258541	chr7	158513626	158630410	116784	NM_003382	VIPR2
9	chr7	157553706	158812247	1258541	chr7	158116763	158190281	73518	NM_017760	NCAPG2
9	chr7	157553706	158812247	1258541	chr7	157024510	158073243	1048733	NM_002847	PTPRN2
9	chr7	157553706	158812247	1258541	chr7	157024510	158073243	1048733	NM_130843	PTPRN2
9	chr7	157553706	158812247	1258541	chr7	157024510	158073243	1048733	NM_130842	PTPRN2
9	chr7	157553706	158812247	1258541	chr7	158018170	158018266	96	NR_030325	MIR595
9	chr7	157553706	158812247	1258541	chr7	158077068	158077149	81	NR_049893	MIR5707
9	chr7	157553706	158812247	1258541	chr7	158493805	158511690	17885	NR_024394	LINC00689
9	chr7	157553706	158812247	1258541	chr7	158216449	158315080	98631	NM_020728	ESYT2
9	chr7	157553706	158812247	1258541	chr7	158342029	158431644	89615	NM_018051	WDR60
10	chr6	16699739	16803452	103713	chr6	16407321	16869700	462379	NM_001128164	ATXN1
10	chr6	16699739	16803452	103713	chr6	16407321	16869700	462379	NM_000332	ATXN1
11	chr6	162767020	162943840	176820	chr6	161688579	163068824	1380245	NM_013988	PARK2
11	chr6	162767020	162943840	176820	chr6	161688579	163068824	1380245	NM_013987	PARK2
11	chr6	162767020	162943840	176820	chr6	161688579	163068824	1380245	NM_004562	PARK2
12	chr5	58116787	72845587	14728800	chr5	65258137	65412607	154470	NM_001006600	ERBB2IP
12	chr5	58116787	72845587	14728800	chr5	63837529	63943877	106348	NM_001029875	RGS7BP
12	chr5	58116787	72845587	14728800	chr5	60205415	60276662	71247	NM_000082	ERCC8
12	chr5	58116787	72845587	14728800	chr5	58300622	58688484	387862	NM_001197219	PDE4D
12	chr5	58116787	72845587	14728800	chr5	57914695	58183163	268468	NM_138453	RAB3C
12	chr5	58116787	72845587	14728800	chr5	58300622	58331516	30894	NM_001197223	PDE4D
12	chr5	58116787	72845587	14728800	chr5	58300622	58607702	307080	NM_001197220	PDE4D
12	chr5	58116787	72845587	14728800	chr5	58300622	58371096	70474	NM_001197222	PDE4D
12	chr5	58116787	72845587	14728800	chr5	58300622	58371096	70474	NM_001197221	PDE4D
12	chr5	58116787	72845587	14728800	chr5	58300622	59225378	924756	NM_001104631	PDE4D
12	chr5	58116787	72845587	14728800	chr5	58300622	59819682	1519060	NM_001165899	PDE4D
12	chr5	58116787	72845587	14728800	chr5	58300622	59100195	799573	NM_001197218	PDE4D
12	chr5	58116787	72845587	14728800	chr5	59928495	60031750	103255	NM_001145208	DEPDC1B
12	chr5	58116787	72845587	14728800	chr5	59819296	59879241	59945	NR_024617	PART1
12	chr5	58116787	72845587	14728800	chr5	58300622	58918081	617459	NM_006203	PDE4D
12	chr5	58116787	72845587	14728800	chr5	59928495	60031750	103255	NM_018369	DEPDC1B
12	chr5	58116787	72845587	14728800	chr5	59819515	59858002	38487	NR_028509	PART1
12	chr5	58116787	72845587	14728800	chr5	59819515	59822849	3334	NR_028508	PART1
12	chr5	58116787	72845587	14728800	chr5	60083372	60175858	92486	NM_001104558	ELOVL7
12	chr5	58116787	72845587	14728800	chr5	60083372	60175858	92486	NM_024930	ELOVL7
12	chr5	58116787	72845587	14728800	chr5	61637745	61718768	81023	NM_001243952	KIF2A
12	chr5	58116787	72845587	14728800	chr5	60489292	60494059	4767	NM_001048249	SMIM15
12	chr5	58116787	72845587	14728800	chr5	60276712	60484621	207909	NM_174889	NDUFAF2
12	chr5	58116787	72845587	14728800	chr5	60969392	61038119	68727	NM_173667	C5orf64
12	chr5	58116787	72845587	14728800	chr5	60663856	60877756	213900	NM_020928	ZSWIM6
12	chr5	58116787	72845587	14728800	chr5	61637745	61718768	81023	NM_001098511	KIF2A
12	chr5	58116787	72845587	14728800	chr5	61910318	61960172	49854	NR_073584	IPO11-LRRC70
12	chr5	58116787	72845587	14728800	chr5	61720107	61735485	15378	NM_014473	DIMT1
12	chr5	58116787	72845587	14728800	chr5	61637745	61718768	81023	NM_001243953	KIF2A
12	chr5	58116787	72845587	14728800	chr5	61637745	61718768	81023	NM_004520	KIF2A
12	chr5	58116787	72845587	14728800	chr5	61744329	61960172	215843	NM_016338	IPO11
12	chr5	58116787	72845587	14728800	chr5	61750467	61960172	209705	NM_001134779	IPO11
12	chr5	58116787	72845587	14728800	chr5	63291630	63293875	2245	NM_000524	HTR1A
12	chr5	58116787	72845587	14728800	chr5	61910318	61913031	2713	NM_181506	LRRC70
12	chr5	58116787	72845587	14728800	chr5	63497426	63704452	207026	NM_001113561	RNF180
12	chr5	58116787	72845587	14728800	chr5	63497426	63549095	51669	NM_178532	RNF180
12	chr5	58116787	72845587	14728800	chr5	64894818	64919132	24314	NR_046350	PPWD1
12	chr5	58116787	72845587	14728800	chr5	64849348	64894751	45403	NM_001267038	CENPK
12	chr5	58116787	72845587	14728800	chr5	64049733	64100252	50519	NM_173829	SREK1IP1
12	chr5	58116787	72845587	14728800	chr5	63907232	63943877	36645	NR_073511	RGS7BP
12	chr5	58116787	72845587	14728800	chr5	63907232	63943877	36645	NM_001271890	RGS7BP
12	chr5	58116787	72845587	14728800	chr5	63907232	63943877	36645	NM_001271891	RGS7BP
12	chr5	58116787	72845587	14728800	chr5	64021890	64049773	27883	NM_001164442	FAM159B
12	chr5	58116787	72845587	14728800	chr5	64480318	64813460	333142	NM_197941	ADAMTS6
12	chr5	58116787	72845587	14728800	chr5	64100510	64350346	249836	NM_005869	CWC27
12	chr5	58116787	72845587	14728800	chr5	64849348	64894751	45403	NM_022145	CENPK
12	chr5	58116787	72845587	14728800	chr5	65053778	65160867	107089	NM_020726	NLN
12	chr5	58116787	72845587	14728800	chr5	64956313	64997710	41397	NM_001093756	TRAPPC13
12	chr5	58116787	72845587	14728800	chr5	64894818	64919132	24314	NR_046348	PPWD1
12	chr5	58116787	72845587	14728800	chr5	64894818	64919132	24314	NR_046349	PPWD1
12	chr5	58116787	72845587	14728800	chr5	64921262	64955943	34681	NM_033228	TRIM23
12	chr5	58116787	72845587	14728800	chr5	64894818	64919132	24314	NM_015342	PPWD1
12	chr5	58116787	72845587	14728800	chr5	64921262	64955943	34681	NM_033227	TRIM23
12	chr5	58116787	72845587	14728800	chr5	64921262	64955943	34681	NM_001656	TRIM23
12	chr5	58116787	72845587	14728800	chr5	64956313	64997710	41397	NM_001093755	TRAPPC13
12	chr5	58116787	72845587	14728800	chr5	64956313	64962288	5975	NR_003545	TRAPPC13
12	chr5	58116787	72845587	14728800	chr5	64956313	64997710	41397	NM_024941	TRAPPC13
12	chr5	58116787	72845587	14728800	chr5	64956313	64997710	41397	NM_001243737	TRAPPC13
12	chr5	58116787	72845587	14728800	chr5	64997510	65053697	56187	NM_019072	SGTB
12	chr5	58116787	72845587	14728800	chr5	65258137	65412607	154470	NM_001253701	ERBB2IP
12	chr5	58116787	72845587	14728800	chr5	65258137	65412607	154470	NM_001253697	ERBB2IP
12	chr5	58116787	72845587	14728800	chr5	65258137	65412607	154470	NM_001253699	ERBB2IP
12	chr5	58116787	72845587	14728800	chr5	65927931	66501179	573248	NM_001164664	MAST4
12	chr5	58116787	72845587	14728800	chr5	65475801	65515200	39399	NM_001270492	SREK1
12	chr5	58116787	72845587	14728800	chr5	65276388	65277157	769	NR_028474	LOC100303749
12	chr5	58116787	72845587	14728800	chr5	65258137	65412607	154470	NM_018695	ERBB2IP
12	chr5	58116787	72845587	14728800	chr5	65258137	65412607	154470	NM_001253698	ERBB2IP
12	chr5	58116787	72845587	14728800	chr5	65475801	65515200	39399	NM_001077199	SREK1
12	chr5	58116787	72845587	14728800	chr5	65475801	65489324	13523	NM_001270493	SREK1
12	chr5	58116787	72845587	14728800	chr5	65476418	65515200	38782	NM_139168	SREK1
12	chr5	58116787	72845587	14728800	chr5	71550991	71651840	100849	NM_015084	MRPS27
12	chr5	58116787	72845587	14728800	chr5	66513859	66528373	14514	NM_005582	CD180
12	chr5	58116787	72845587	14728800	chr5	65927931	66318107	390176	NM_198828	MAST4
12	chr5	58116787	72845587	14728800	chr5	66160359	66501179	340820	NM_015183	MAST4
12	chr5	58116787	72845587	14728800	chr5	68702617	68746387	43770	NM_133340	RAD17
12	chr5	58116787	72845587	14728800	chr5	67547339	67633405	86066	NM_181523	PIK3R1
12	chr5	58116787	72845587	14728800	chr5	67620007	67633405	13398	NM_181524	PIK3R1
12	chr5	58116787	72845587	14728800	chr5	67624151	67633405	9254	NM_001242466	PIK3R1
12	chr5	58116787	72845587	14728800	chr5	67622222	67633405	11183	NM_181504	PIK3R1
12	chr5	58116787	72845587	14728800	chr5	68425531	68436323	10792	NM_024055	SLC30A5
12	chr5	58116787	72845587	14728800	chr5	68566377	68609013	42636	NM_001799	CDK7
12	chr5	58116787	72845587	14728800	chr5	68498592	68509826	11234	NM_031966	CCNB1
12	chr5	58116787	72845587	14728800	chr5	68425531	68436323	10792	NM_001251969	SLC30A5
12	chr5	58116787	72845587	14728800	chr5	68425531	68462655	37124	NM_022902	SLC30A5
12	chr5	58116787	72845587	14728800	chr5	68549328	68561741	12413	NM_033281	MRPS36
12	chr5	58116787	72845587	14728800	chr5	68521130	68541940	20810	NM_022909	CENPH
12	chr5	58116787	72845587	14728800	chr5	68701394	68746387	44993	NM_133344	RAD17
12	chr5	58116787	72845587	14728800	chr5	68683308	68701596	18288	NM_001015891	TAF9
12	chr5	58116787	72845587	14728800	chr5	68612274	68652166	39892	NM_176816	CCDC125
12	chr5	58116787	72845587	14728800	chr5	68696325	68701165	4840	NM_003187	TAF9
12	chr5	58116787	72845587	14728800	chr5	68683308	68701165	17857	NM_016283	TAF9
12	chr5	58116787	72845587	14728800	chr5	68696325	68701596	5271	NM_001015892	TAF9
12	chr5	58116787	72845587	14728800	chr5	68700879	68746387	45508	NM_133343	RAD17
12	chr5	58116787	72845587	14728800	chr5	68701394	68746387	44993	NM_133338	RAD17
12	chr5	58116787	72845587	14728800	chr5	68701394	68746387	44993	NM_133342	RAD17
12	chr5	58116787	72845587	14728800	chr5	68702287	68746384	44097	NM_002873	RAD17
12	chr5	58116787	72845587	14728800	chr5	70366706	70399253	32547	NM_001515	GTF2H2
12	chr5	58116787	72845587	14728800	chr5	68702617	68746387	43770	NM_133341	RAD17
12	chr5	58116787	72845587	14728800	chr5	68835759	68889687	53928	NM_001205255	OCLN
12	chr5	58116787	72845587	14728800	chr5	68713442	69917303	1203861	NR_029426	SMA4
12	chr5	58116787	72845587	14728800	chr5	68703036	68746387	43351	NM_133339	RAD17
12	chr5	58116787	72845587	14728800	chr5	68824345	68889687	65342	NM_001205254	OCLN
12	chr5	58116787	72845587	14728800	chr5	68823874	68889687	65813	NM_002538	OCLN
12	chr5	58116787	72845587	14728800	chr5	68746694	68773646	26952	NM_001038603	MARVELD2
12	chr5	58116787	72845587	14728800	chr5	68746694	68773646	26952	NM_001244734	MARVELD2
12	chr5	58116787	72845587	14728800	chr5	68971045	69042028	70983	NR_027386	GUSBP3
12	chr5	58116787	72845587	14728800	chr5	68891829	68924108	32279	NM_001042490	GTF2H2D
12	chr5	58116787	72845587	14728800	chr5	68891809	68924334	32525	NM_001515	GTF2H2
12	chr5	58116787	72845587	14728800	chr5	68866398	68885276	18878	NR_026578	LOC647859
12	chr5	58116787	72845587	14728800	chr5	68891806	68924485	32679	NM_001098728	GTF2H2C
12	chr5	58116787	72845587	14728800	chr5	68891805	68926811	35006	NR_033417	GTF2H2B
12	chr5	58116787	72845587	14728800	chr5	68962735	68964784	2049	NR_027439	LOC100272216
12	chr5	58116787	72845587	14728800	chr5	69381105	69409178	28073	NM_022876	SMN2
12	chr5	58116787	72845587	14728800	chr5	69206796	69247894	41098	NR_033968	GUSBP9
12	chr5	58116787	72845587	14728800	chr5	69356833	69374690	17857	NM_022978	SERF1B
12	chr5	58116787	72845587	14728800	chr5	69356827	69364281	7454	NM_022968	SERF1A
12	chr5	58116787	72845587	14728800	chr5	69356827	69374696	17869	NM_021967	SERF1A
12	chr5	58116787	72845587	14728800	chr5	69356833	69364279	7446	NM_001178087	SERF1B
12	chr5	58116787	72845587	14728800	chr5	70256523	70284594	28071	NM_022874	SMN1
12	chr5	58116787	72845587	14728800	chr5	69746953	69779640	32687	NM_001098728	GTF2H2C
12	chr5	58116787	72845587	14728800	chr5	69746952	69781945	34993	NR_033417	GTF2H2B
12	chr5	58116787	72845587	14728800	chr5	69459044	69557378	98334	NR_024054	SMA4
12	chr5	58116787	72845587	14728800	chr5	69381105	69409178	28073	NM_017411	SMN2
12	chr5	58116787	72845587	14728800	chr5	69381105	69409178	28073	NM_022875	SMN2
12	chr5	58116787	72845587	14728800	chr5	69381105	69409174	28069	NM_000344	SMN1
12	chr5	58116787	72845587	14728800	chr5	69381105	69409174	28069	NM_022874	SMN1
12	chr5	58116787	72845587	14728800	chr5	69381105	69409178	28073	NM_022877	SMN2
12	chr5	58116787	72845587	14728800	chr5	69470444	69621760	151316	NR_029426	SMA4
12	chr5	58116787	72845587	14728800	chr5	69533394	69590570	57176	NR_033968	GUSBP9
12	chr5	58116787	72845587	14728800	chr5	70232251	70250107	17856	NM_022978	SERF1B
12	chr5	58116787	72845587	14728800	chr5	70051514	70185976	134462	NR_029426	SMA4
12	chr5	58116787	72845587	14728800	chr5	69746976	69779263	32287	NM_001042490	GTF2H2D
12	chr5	58116787	72845587	14728800	chr5	69847834	69886906	39072	NR_033968	GUSBP9
12	chr5	58116787	72845587	14728800	chr5	69812625	69917305	104680	NR_034021	SMA5
12	chr5	58116787	72845587	14728800	chr5	69818083	69823370	5287	NR_073404	LOC441081
12	chr5	58116787	72845587	14728800	chr5	70082709	70122945	40236	NR_033968	GUSBP9
12	chr5	58116787	72845587	14728800	chr5	70232245	70250113	17868	NM_021967	SERF1A
12	chr5	58116787	72845587	14728800	chr5	70232245	70239700	7455	NM_022968	SERF1A
12	chr5	58116787	72845587	14728800	chr5	70232251	70239698	7447	NM_001178087	SERF1B
12	chr5	58116787	72845587	14728800	chr5	70364245	70399257	35012	NR_033417	GTF2H2B
12	chr5	58116787	72845587	14728800	chr5	70256523	70284598	28075	NM_022876	SMN2
12	chr5	58116787	72845587	14728800	chr5	70256523	70284594	28071	NM_000344	SMN1
12	chr5	58116787	72845587	14728800	chr5	70256523	70284598	28075	NM_022875	SMN2
12	chr5	58116787	72845587	14728800	chr5	70300065	70356697	56632	NM_022892	NAIP
12	chr5	58116787	72845587	14728800	chr5	70256523	70284598	28075	NM_022877	SMN2
12	chr5	58116787	72845587	14728800	chr5	70256523	70284598	28075	NM_017411	SMN2
12	chr5	58116787	72845587	14728800	chr5	70300065	70356697	56632	NM_004536	NAIP
12	chr5	58116787	72845587	14728800	chr5	70366555	70399256	32701	NM_001098728	GTF2H2C
12	chr5	58116787	72845587	14728800	chr5	71438873	71541153	102280	NM_005909	MAP1B
12	chr5	58116787	72845587	14728800	chr5	70405785	70424653	18868	NR_026578	LOC647859
12	chr5	58116787	72845587	14728800	chr5	70366932	70399233	32301	NM_001042490	GTF2H2D
12	chr5	58116787	72845587	14728800	chr5	70533779	70539713	5934	NR_033968	GUSBP9
12	chr5	58116787	72845587	14728800	chr5	70432838	70460336	27498	NM_004536	NAIP
12	chr5	58116787	72845587	14728800	chr5	70432838	70460339	27501	NM_022892	NAIP
12	chr5	58116787	72845587	14728800	chr5	70551808	70590878	39070	NR_033968	GUSBP9
12	chr5	58116787	72845587	14728800	chr5	70707367	70717576	10209	NR_003922	PMCHL2
12	chr5	58116787	72845587	14728800	chr5	70787197	70899405	112208	NM_018429	BDP1
12	chr5	58116787	72845587	14728800	chr5	70918870	70990286	71416	NM_022132	MCCC2
12	chr5	58116787	72845587	14728800	chr5	71050745	71052631	1886	NM_004291	CARTPT
12	chr5	58116787	72845587	14728800	chr5	71501049	71501123	74	NR_039967	MIR4803
12	chr5	58116787	72845587	14728800	chr5	72452143	72463400	11257	NM_173490	TMEM171
12	chr5	58116787	72845587	14728800	chr5	72148173	72245971	97798	NM_002270	TNPO1
12	chr5	58116787	72845587	14728800	chr5	71774989	71839005	64016	NM_152625	ZNF366
12	chr5	58116787	72845587	14728800	chr5	71651955	71690936	38981	NM_024754	PTCD2
12	chr5	58116787	72845587	14728800	chr5	72287563	72422105	134542	NM_001146032	FCHO2
12	chr5	58116787	72845587	14728800	chr5	72179685	72245971	66286	NM_153188	TNPO1
12	chr5	58116787	72845587	14728800	chr5	72210173	72210246	73	NR_039968	MIR4804
12	chr5	58116787	72845587	14728800	chr5	72452143	72463400	11257	NM_001161342	TMEM171
12	chr5	58116787	72845587	14728800	chr5	72287563	72422105	134542	NM_138782	FCHO2
12	chr5	58116787	72845587	14728800	chr5	72830005	72837204	7199	NM_001037637	BTF3
12	chr5	58116787	72845587	14728800	chr5	72830005	72837204	7199	NM_001207	BTF3
12	chr5	58116787	72845587	14728800	chr5	72504778	72506726	1948	NM_153217	TMEM174
12	chr5	58116787	72845587	14728800	chr5	72777840	72780108	2268	NM_004472	FOXD1
13	chr4	151856718	151884547	27829	chr4	151405260	152156099	750839	NM_006726	LRBA
13	chr4	151856718	151884547	27829	chr4	151405260	152155869	750609	NM_001199282	LRBA
14	chr3	71223511	71819797	596286	chr3	71086554	71715830	629276	NM_032682	FOXP1
14	chr3	71223511	71819797	596286	chr3	71086554	71262782	176228	NM_001244815	FOXP1
14	chr3	71223511	71819797	596286	chr3	71086554	71715830	629276	NM_001244810	FOXP1
14	chr3	71223511	71819797	596286	chr3	71086554	71715594	629040	NM_001244808	FOXP1
14	chr3	71223511	71819797	596286	chr3	71811129	71886222	75093	NM_001134649	EIF4E3
14	chr3	71223511	71819797	596286	chr3	71329723	71715830	386107	NM_001012505	FOXP1
14	chr3	71223511	71819797	596286	chr3	71086554	71377006	290452	NM_001244814	FOXP1
14	chr3	71223511	71819797	596286	chr3	71086554	71436601	350047	NM_001244812	FOXP1
14	chr3	71223511	71819797	596286	chr3	71086554	71675398	588844	NM_001244816	FOXP1
14	chr3	71223511	71819797	596286	chr3	71673810	71673930	120	NR_031697	MIR1284
14	chr3	71223511	71819797	596286	chr3	71811129	71886614	75485	NM_173359	EIF4E3
14	chr3	71223511	71819797	596286	chr3	71811129	71857216	46087	NM_001134651	EIF4E3
14	chr3	71223511	71819797	596286	chr3	71811129	71860959	49830	NM_001134650	EIF4E3
15	chr3	95019980	101883423	6863443	chr3	101694152	101778975	84823	NM_018004	TMEM45A
15	chr3	95019980	101883423	6863443	chr3	101316463	101380166	63703	NM_001167924	CMSS1
15	chr3	95019980	101883423	6863443	chr3	100840129	100998267	158138	NM_001850	COL8A1
15	chr3	95019980	101883423	6863443	chr3	100840129	100998267	158138	NM_020351	COL8A1
15	chr3	95019980	101883423	6863443	chr3	99288706	99289636	930	NM_054106	OR5AC2
15	chr3	95019980	101883423	6863443	chr3	95181672	95257212	75540	NM_001174150	ARL13B
15	chr3	95019980	101883423	6863443	chr3	95074570	95175624	101054	NM_000313	PROS1
15	chr3	95019980	101883423	6863443	chr3	95181672	95257212	75540	NM_182896	ARL13B
15	chr3	95019980	101883423	6863443	chr3	95181672	95257212	75540	NR_033427	ARL13B
15	chr3	95019980	101883423	6863443	chr3	95181672	95257212	75540	NM_144996	ARL13B
15	chr3	95019980	101883423	6863443	chr3	95259455	95264521	5066	NM_176815	DHFRL1
15	chr3	95019980	101883423	6863443	chr3	95215904	95230144	14240	NM_001001850	STX19
15	chr3	95019980	101883423	6863443	chr3	95181672	95257212	75540	NM_001174151	ARL13B
15	chr3	95019980	101883423	6863443	chr3	95259455	95264757	5302	NM_001195643	DHFRL1
15	chr3	95019980	101883423	6863443	chr3	99143350	99173985	30635	NM_153182	MINA
15	chr3	95019980	101883423	6863443	chr3	99143350	99173985	30635	NM_032778	MINA
15	chr3	95019980	101883423	6863443	chr3	98016114	98950476	934362	NM_001080448	EPHA6
15	chr3	95019980	101883423	6863443	chr3	95264544	95328320	63776	NM_022072	NSUN3
15	chr3	95019980	101883423	6863443	chr3	96855956	96884727	28771	NR_077228	LOC100287639
15	chr3	95019980	101883423	6863443	chr3	96139796	96192859	53063	NR_015400	LINC00879
15	chr3	95019980	101883423	6863443	chr3	98641179	98850111	208932	NM_173655	EPHA6
15	chr3	95019980	101883423	6863443	chr3	99023573	99146520	122947	NM_153605	CRYBG3
15	chr3	95019980	101883423	6863443	chr3	98966284	99000063	33779	NM_177976	ARL6
15	chr3	95019980	101883423	6863443	chr3	98966284	99000063	33779	NM_032146	ARL6
15	chr3	95019980	101883423	6863443	chr3	99143350	99173985	30635	NM_001261829	MINA
15	chr3	95019980	101883423	6863443	chr3	99143350	99173985	30635	NM_001042533	MINA
15	chr3	95019980	101883423	6863443	chr3	99188216	99236838	48622	NM_001105580	GABRR3
15	chr3	95019980	101883423	6863443	chr3	99188216	99236838	48622	NR_047685	GABRR3
15	chr3	95019980	101883423	6863443	chr3	99465818	99466796	978	NM_001005479	OR5H6
15	chr3	95019980	101883423	6863443	chr3	99350919	99351852	933	NM_001005514	OR5H14
15	chr3	95019980	101883423	6863443	chr3	99334231	99335173	942	NM_001005338	OR5H1
15	chr3	95019980	101883423	6863443	chr3	99370233	99371175	942	NM_001005515	OR5H15
15	chr3	95019980	101883423	6863443	chr3	99717006	99724600	7594	NM_001040199	CLDND1
15	chr3	95019980	101883423	6863443	chr3	99717006	99724600	7594	NM_001040182	CLDND1
15	chr3	95019980	101883423	6863443	chr3	99717006	99724600	7594	NM_001040181	CLDND1
15	chr3	95019980	101883423	6863443	chr3	99717006	99724600	7594	NM_001040183	CLDND1
15	chr3	95019980	101883423	6863443	chr3	99671110	99672062	952	NM_001004736	OR5K1
15	chr3	95019980	101883423	6863443	chr3	99484421	99485366	945	NM_001005482	OR5H2
15	chr3	95019980	101883423	6863443	chr3	99555387	99556353	966	NM_001005517	OR5K4
15	chr3	95019980	101883423	6863443	chr3	99592199	99593165	966	NM_001005516	OR5K3
15	chr3	95019980	101883423	6863443	chr3	99699214	99700165	951	NM_001004737	OR5K2
15	chr3	95019980	101883423	6863443	chr3	99717006	99724600	7594	NM_019895	CLDND1
15	chr3	95019980	101883423	6863443	chr3	99934237	99997379	63142	NM_006100	ST3GAL6
15	chr3	95019980	101883423	6863443	chr3	99717006	99724600	7594	NM_001040200	CLDND1
15	chr3	95019980	101883423	6863443	chr3	99780979	99795145	14166	NM_000097	CPOX
15	chr3	95019980	101883423	6863443	chr3	99733432	99734684	1252	NM_005290	GPR15
15	chr3	95019980	101883423	6863443	chr3	99934237	99997379	63142	NM_001271145	ST3GAL6
15	chr3	95019980	101883423	6863443	chr3	99933769	99997379	63610	NM_001271146	ST3GAL6
15	chr3	95019980	101883423	6863443	chr3	99915866	99934185	18319	NR_046683	ST3GAL6-AS1
15	chr3	95019980	101883423	6863443	chr3	99933769	99997379	63610	NM_001271148	ST3GAL6
15	chr3	95019980	101883423	6863443	chr3	99933769	99997379	63610	NM_001271147	ST3GAL6
15	chr3	95019980	101883423	6863443	chr3	99933769	99997379	63610	NM_001271142	ST3GAL6
15	chr3	95019980	101883423	6863443	chr3	99997503	100103223	105720	NM_080927	DCBLD2
15	chr3	95019980	101883423	6863443	chr3	101049461	101316039	266578	NM_001042459	FILIP1L
15	chr3	95019980	101883423	6863443	chr3	101034677	101316039	281362	NM_182909	FILIP1L
15	chr3	95019980	101883423	6863443	chr3	101019367	101380166	360799	NM_032359	CMSS1
15	chr3	95019980	101883423	6863443	chr3	101049461	101077736	28275	NM_014890	FILIP1L
15	chr3	95019980	101883423	6863443	chr3	101165847	101165932	85	NR_037486	MIR3921
15	chr3	95019980	101883423	6863443	chr3	101564992	101602932	37940	NM_014820	TOMM70A
15	chr3	95019980	101883423	6863443	chr3	101462350	101526786	64436	NM_001199198	TBC1D23
15	chr3	95019980	101883423	6863443	chr3	101462350	101526786	64436	NM_018309	TBC1D23
15	chr3	95019980	101883423	6863443	chr3	101387357	101391728	4371	NR_028358	TMEM30C
15	chr3	95019980	101883423	6863443	chr3	101387357	101395720	8363	NR_028357	TMEM30C
15	chr3	95019980	101883423	6863443	chr3	101536251	101557168	20917	NM_020202	NIT2
15	chr3	95019980	101883423	6863443	chr3	101602726	101657860	55134	NM_001085451	LNP1
15	chr3	95019980	101883423	6863443	chr3	101811122	101897013	85891	NM_032787	GPR128
16	chr3	174806420	176937369	2130949	chr3	176279795	176315726	35931	NR_046390	NAALADL2-AS3
16	chr3	174806420	176937369	2130949	chr3	176059804	177006122	946318	NM_207015	NAALADL2
16	chr3	174806420	176937369	2130949	chr3	174598937	175483810	884873	NM_014932	NLGN1
16	chr3	174806420	176937369	2130949	chr3	176570022	176570104	82	NR_039952	MIR4789
17	chr3	197326041	197704191	378150	chr3	197534813	197549688	14875	NM_001204897	TM4SF19
17	chr3	197326041	197704191	378150	chr3	197449649	197498981	49332	NM_005017	PCYT1A
17	chr3	197326041	197704191	378150	chr3	197353903	197372158	18255	NR_034088	LINC00885
17	chr3	197326041	197704191	378150	chr3	197408719	197422697	13978	NM_001039617	ZDHHC19
17	chr3	197326041	197704191	378150	chr3	197427779	197444698	16919	NM_152672	SLC51A
17	chr3	197326041	197704191	378150	chr3	197527352	197549688	22336	NR_037950	TM4SF19-TCTEX1D2
17	chr3	197326041	197704191	378150	chr3	197502486	197529562	27076	NM_152773	TCTEX1D2
17	chr3	197326041	197704191	378150	chr3	197680053	197715036	34983	NM_152617	RNF168
17	chr3	197326041	197704191	378150	chr3	197534813	197549688	14875	NM_138461	TM4SF19
17	chr3	197326041	197704191	378150	chr3	197534813	197549688	14875	NM_001204898	TM4SF19
17	chr3	197326041	197704191	378150	chr3	197564765	197643742	78977	NM_015562	UBXN7
18	chr2	19443	11594900	11575457	chr2	9264344	9463263	198919	NM_001135191	ASAP2
18	chr2	19443	11594900	11575457	chr2	8065351	8386000	320649	NR_034135	LINC00299
18	chr2	19443	11594900	11575457	chr2	3983120	3999497	16377	NR_037881	LOC100505964
18	chr2	19443	11594900	11575457	chr2	254868	268282	13414	NR_024080	ACP1
18	chr2	19443	11594900	11575457	chr2	254868	268282	13414	NM_004300	ACP1
18	chr2	19443	11594900	11575457	chr2	28813	36588	7775	NM_001077710	FAM110C
18	chr2	19443	11594900	11575457	chr2	208135	254068	45933	NM_015677	SH3YL1
18	chr2	19443	11594900	11575457	chr2	208135	254068	45933	NM_001159597	SH3YL1
18	chr2	19443	11594900	11575457	chr2	1396239	1525506	129267	NM_000547	TPO
18	chr2	19443	11594900	11575457	chr2	1396239	1525506	129267	NM_001206745	TPO
18	chr2	19443	11594900	11575457	chr2	1396239	1525506	129267	NM_001206744	TPO
18	chr2	19443	11594900	11575457	chr2	936553	1350391	413838	NM_018968	SNTG2
18	chr2	19443	11594900	11575457	chr2	254868	268282	13414	NM_007099	ACP1
18	chr2	19443	11594900	11575457	chr2	254868	262481	7613	NM_001040649	ACP1
18	chr2	19443	11594900	11575457	chr2	769836	854112	84276	NR_033880	LOC339822
18	chr2	19443	11594900	11575457	chr2	269560	278308	8748	NM_001002919	FAM150B
18	chr2	19443	11594900	11575457	chr2	657972	667439	9467	NM_152834	TMEM18
18	chr2	19443	11594900	11575457	chr2	1396239	1525506	129267	NM_175719	TPO
18	chr2	19443	11594900	11575457	chr2	1771891	2314052	542161	NM_015025	MYT1L
18	chr2	19443	11594900	11575457	chr2	1614665	1727298	112633	NM_012293	PXDN
18	chr2	19443	11594900	11575457	chr2	1397186	1525506	128320	NM_175722	TPO
18	chr2	19443	11594900	11575457	chr2	1397186	1525506	128320	NM_175721	TPO
18	chr2	19443	11594900	11575457	chr2	3620296	3670109	49813	NM_199235	COLEC11
18	chr2	19443	11594900	11575457	chr2	3600727	3606384	5657	NM_001011	RPS7
18	chr2	19443	11594900	11575457	chr2	2302010	2309887	7877	NR_024468	LOC730811
18	chr2	19443	11594900	11575457	chr2	3362452	3462349	99897	NM_016030	TRAPPC12
18	chr2	19443	11594900	11575457	chr2	3171747	3360660	188913	NM_003310	TSSC1
18	chr2	19443	11594900	11575457	chr2	3480696	3502354	21658	NM_018269	ADI1
18	chr2	19443	11594900	11575457	chr2	3570565	3583815	13250	NM_002936	RNASEH1
18	chr2	19443	11594900	11575457	chr2	3583851	3587215	3364	NR_038431	LOC100506054
18	chr2	19443	11594900	11575457	chr2	3583851	3587215	3364	NR_038430	LOC100506054
18	chr2	19443	11594900	11575457	chr2	3583850	3587215	3365	NR_038429	LOC100506054
18	chr2	19443	11594900	11575457	chr2	3620296	3670109	49813	NM_001255982	COLEC11
18	chr2	19443	11594900	11575457	chr2	3620296	3670109	49813	NM_024027	COLEC11
18	chr2	19443	11594900	11575457	chr2	3620296	3670109	49813	NM_001255984	COLEC11
18	chr2	19443	11594900	11575457	chr2	3620296	3670109	49813	NM_001255983	COLEC11
18	chr2	19443	11594900	11575457	chr2	3620296	3670109	49813	NR_045659	COLEC11
18	chr2	19443	11594900	11575457	chr2	3631516	3670109	38593	NM_001255988	COLEC11
18	chr2	19443	11594900	11575457	chr2	3627370	3670109	42739	NM_001255985	COLEC11
18	chr2	19443	11594900	11575457	chr2	3631516	3670109	38593	NM_001255987	COLEC11
18	chr2	19443	11594900	11575457	chr2	3631516	3670109	38593	NM_001255986	COLEC11
18	chr2	19443	11594900	11575457	chr2	3631516	3670109	38593	NM_001255989	COLEC11
18	chr2	19443	11594900	11575457	chr2	3683660	3728135	44475	NM_018436	ALLC
18	chr2	19443	11594900	11575457	chr2	5750249	5758968	8719	NM_003108	SOX11
18	chr2	19443	11594900	11575457	chr2	4653682	4681687	28005	NR_034134	LOC727982
18	chr2	19443	11594900	11575457	chr2	6935246	6955814	20568	NM_080657	RSAD2
18	chr2	19443	11594900	11575457	chr2	6786750	6827893	41143	NR_038369	LINC00487
18	chr2	19443	11594900	11575457	chr2	6039560	6045815	6255	NR_026833	LOC400940
18	chr2	19443	11594900	11575457	chr2	5990269	6037801	47532	NR_026832	LOC150622
18	chr2	19443	11594900	11575457	chr2	6908231	6923401	15170	NM_001256477	CMPK2
18	chr2	19443	11594900	11575457	chr2	6898134	6923401	25267	NM_001256478	CMPK2
18	chr2	19443	11594900	11575457	chr2	6905890	6923401	17511	NM_207315	CMPK2
18	chr2	19443	11594900	11575457	chr2	6905890	6924217	18327	NR_046236	CMPK2
18	chr2	19443	11594900	11575457	chr2	6974973	7101760	126787	NM_014746	RNF144A
18	chr2	19443	11594900	11575457	chr2	6969857	6976264	6407	NR_033997	RNF144A-AS1
18	chr2	19443	11594900	11575457	chr2	7980006	8034396	54390	NR_015405	LOC339788
18	chr2	19443	11594900	11575457	chr2	7478842	7507832	28990	NR_038432	LOC100506274
18	chr2	19443	11594900	11575457	chr2	8914151	9061327	147176	NM_138799	MBOAT2
18	chr2	19443	11594900	11575457	chr2	8739563	8742034	2471	NM_002166	ID2
18	chr2	19443	11594900	11575457	chr2	8786437	8895206	108769	NM_020738	KIDINS220
18	chr2	19443	11594900	11575457	chr2	9901021	9991996	90975	NM_005680	TAF1B
18	chr2	19443	11594900	11575457	chr2	9641556	9688557	47001	NM_006826	YWHAQ
18	chr2	19443	11594900	11575457	chr2	9264344	9463263	198919	NM_003887	ASAP2
18	chr2	19443	11594900	11575457	chr2	9546861	9613368	66507	NM_003183	ADAM17
18	chr2	19443	11594900	11575457	chr2	9463265	9481094	17829	NM_022334	ITGB1BP1
18	chr2	19443	11594900	11575457	chr2	9463265	9481094	17829	NM_004763	ITGB1BP1
18	chr2	19443	11594900	11575457	chr2	9481116	9530690	49574	NM_016207	CPSF3
18	chr2	19443	11594900	11575457	chr2	9532120	9546042	13922	NM_001039613	IAH1
18	chr2	19443	11594900	11575457	chr2	10840967	10870411	29444	NM_005742	PDIA6
18	chr2	19443	11594900	11575457	chr2	10426254	10485194	58940	NM_001258358	HPCAL1
18	chr2	19443	11594900	11575457	chr2	10180145	10188997	8852	NM_001165931	RRM2
18	chr2	19443	11594900	11575457	chr2	10009242	10059863	50621	NM_198182	GRHL1
18	chr2	19443	11594900	11575457	chr2	10101406	10112414	11008	NM_001177716	KLF11
18	chr2	19443	11594900	11575457	chr2	10101132	10112414	11282	NM_003597	KLF11
18	chr2	19443	11594900	11575457	chr2	10101822	10112414	10592	NM_001177718	KLF11
18	chr2	19443	11594900	11575457	chr2	10114376	10137989	23613	NM_001037160	CYS1
18	chr2	19443	11594900	11575457	chr2	10361276	10485194	123918	NM_134421	HPCAL1
18	chr2	19443	11594900	11575457	chr2	10250190	10250248	58	NR_036222	MIR4261
18	chr2	19443	11594900	11575457	chr2	10199431	10268393	68962	NM_182626	C2orf48
18	chr2	19443	11594900	11575457	chr2	10180313	10188997	8684	NM_001034	RRM2
18	chr2	19443	11594900	11575457	chr2	10360480	10485194	124714	NM_002149	HPCAL1
18	chr2	19443	11594900	11575457	chr2	10387739	10485194	97455	NM_001258357	HPCAL1
18	chr2	19443	11594900	11575457	chr2	10504290	10504426	136	NR_028374	SNORA80B
18	chr2	19443	11594900	11575457	chr2	10497958	10505904	7946	NM_002539	ODC1
18	chr2	19443	11594900	11575457	chr2	10426340	10485194	58854	NM_001258359	HPCAL1
18	chr2	19443	11594900	11575457	chr2	10779225	10842687	63462	NM_144583	ATP6V1C2
18	chr2	19443	11594900	11575457	chr2	10628342	10747564	119222	NR_048552	NOL10
18	chr2	19443	11594900	11575457	chr2	10628342	10747564	119222	NM_001261394	NOL10
18	chr2	19443	11594900	11575457	chr2	10628342	10747564	119222	NM_001261392	NOL10
18	chr2	19443	11594900	11575457	chr2	10628342	10747564	119222	NM_024894	NOL10
18	chr2	19443	11594900	11575457	chr2	10779225	10842687	63462	NM_001039362	ATP6V1C2
18	chr2	19443	11594900	11575457	chr2	11157427	11189753	32326	NR_040080	FLJ33534
18	chr2	19443	11594900	11575457	chr2	10969513	10971802	2289	NM_002236	KCNF1
18	chr2	19443	11594900	11575457	chr2	11501951	11523748	21797	NM_198256	E2F6
18	chr2	19443	11594900	11575457	chr2	11501951	11523748	21797	NR_003093	E2F6
18	chr2	19443	11594900	11575457	chr2	11501951	11523748	21797	NR_003094	E2F6
18	chr2	19443	11594900	11575457	chr2	11239228	11402162	162934	NM_004850	ROCK2
18	chr2	19443	11594900	11575457	chr2	11190629	11204367	13738	NM_182500	C2orf50
18	chr2	19443	11594900	11575457	chr2	11212990	11236449	23459	NM_152391	PQLC3
18	chr2	19443	11594900	11575457	chr2	11451557	11460654	9097	NR_047499	LINC00570
18	chr2	19443	11594900	11575457	chr2	11501951	11523748	21797	NR_003095	E2F6
18	chr2	19443	11594900	11575457	chr2	11591692	11700363	108671	NM_014668	GREB1
18	chr2	19443	11594900	11575457	chr2	11501951	11523748	21797	NR_003092	E2F6
19	chr2	50947040	51164471	217431	chr2	49999146	51113178	1114032	NM_001135659	NRXN1
19	chr2	50947040	51164471	217431	chr2	49999146	51113178	1114032	NM_004801	NRXN1
20	chr2	95514686	97033113	1518427	chr2	96172634	96174906	2272	NM_004418	DUSP2
20	chr2	95514686	97033113	1518427	chr2	96142349	96145615	3266	NM_000682	ADRA2B
20	chr2	95514686	97033113	1518427	chr2	95621492	95629196	7704	NM_138800	TRIM43
20	chr2	95514686	97033113	1518427	chr2	96040025	96052611	12586	NR_003698	FAHD2CP
20	chr2	95514686	97033113	1518427	chr2	96051420	96064454	13034	NM_207328	GPAT2
20	chr2	95514686	97033113	1518427	chr2	96153315	96167902	14587	NM_001002036	ASTL
20	chr2	95514686	97033113	1518427	chr2	96622618	96667843	45225	NR_047657	KANSL3
20	chr2	95514686	97033113	1518427	chr2	96354788	96357818	3030	NM_001008949	ITPRIPL1
20	chr2	95514686	97033113	1518427	chr2	96214329	96238300	23971	NM_020151	STARD7
20	chr2	95514686	97033113	1518427	chr2	96279672	96295478	15806	NM_017849	TMEM127
20	chr2	95514686	97033113	1518427	chr2	96279672	96295478	15806	NM_001193304	TMEM127
20	chr2	95514686	97033113	1518427	chr2	96237880	96272089	34209	NR_046322	LOC285033
20	chr2	95514686	97033113	1518427	chr2	96295610	96303627	8017	NM_004804	CIAO1
20	chr2	95514686	97033113	1518427	chr2	96303800	96335034	31234	NM_014014	SNRNP200
20	chr2	95514686	97033113	1518427	chr2	96355671	96357818	2147	NM_001163524	ITPRIPL1
20	chr2	95514686	97033113	1518427	chr2	96354795	96357818	3023	NM_001163523	ITPRIPL1
20	chr2	95514686	97033113	1518427	chr2	96355661	96357818	2157	NM_178495	ITPRIPL1
20	chr2	95514686	97033113	1518427	chr2	96365210	96405001	39791	NM_015341	NCAPH
20	chr2	95514686	97033113	1518427	chr2	96566190	96582098	15908	NM_212481	ARID5A
20	chr2	95514686	97033113	1518427	chr2	96527109	96537573	10464	NR_026875	NEURL3
20	chr2	95514686	97033113	1518427	chr2	96622618	96667524	44906	NR_047658	KANSL3
20	chr2	95514686	97033113	1518427	chr2	96735393	96769540	34147	NR_024520	LMAN2L
20	chr2	95514686	97033113	1518427	chr2	96622618	96667843	45225	NR_047655	KANSL3
20	chr2	95514686	97033113	1518427	chr2	96622618	96667843	45225	NR_047653	KANSL3
20	chr2	95514686	97033113	1518427	chr2	96622618	96667843	45225	NR_047656	KANSL3
20	chr2	95514686	97033113	1518427	chr2	96622618	96667843	45225	NR_047654	KANSL3
20	chr2	95514686	97033113	1518427	chr2	96672300	96734351	62051	NM_001113382	FER1L5
20	chr2	95514686	97033113	1518427	chr2	96622618	96667843	45225	NM_001115016	KANSL3
20	chr2	95514686	97033113	1518427	chr2	96735393	96769540	34147	NR_024519	LMAN2L
20	chr2	95514686	97033113	1518427	chr2	96735393	96769540	34147	NR_024518	LMAN2L
20	chr2	95514686	97033113	1518427	chr2	96845717	96864848	19131	NM_199078	CNNM3
20	chr2	95514686	97033113	1518427	chr2	96827741	96827817	76	NR_036074	MIR3127
20	chr2	95514686	97033113	1518427	chr2	96735393	96769540	34147	NM_030805	LMAN2L
20	chr2	95514686	97033113	1518427	chr2	96735393	96769540	34147	NM_001142292	LMAN2L
20	chr2	95514686	97033113	1518427	chr2	96735393	96769540	34147	NR_024521	LMAN2L
20	chr2	95514686	97033113	1518427	chr2	96790365	96841355	50990	NM_020184	CNNM4
20	chr2	95514686	97033113	1518427	chr2	96905345	96924626	19281	NM_001172667	FAM178B
20	chr2	95514686	97033113	1518427	chr2	96877450	96887483	10033	NM_016466	ANKRD39
20	chr2	95514686	97033113	1518427	chr2	96845717	96864848	19131	NM_017623	CNNM3
20	chr2	95514686	97033113	1518427	chr2	96867377	96873485	6108	NM_144994	ANKRD23
20	chr2	95514686	97033113	1518427	chr2	96889199	96899462	10263	NM_017789	SEMA4C
20	chr2	95514686	97033113	1518427	chr2	96905345	96927597	22252	NM_016490	FAM178B
20	chr2	95514686	97033113	1518427	chr2	96905345	97016028	110683	NM_001122646	FAM178B
21	chr2	197605805	204072966	6467161	chr2	202866018	202866102	84	NR_003031	SNORD11
21	chr2	197605805	204072966	6467161	chr2	197559630	197883766	324136	NM_001195144	ANKRD44
21	chr2	197605805	204072966	6467161	chr2	202060388	202192150	131762	NM_152525	ALS2CR11
21	chr2	197605805	204072966	6467161	chr2	201285272	201308145	22873	NR_037886	LOC100507140
21	chr2	197605805	204072966	6467161	chr2	198059552	198072885	13333	NM_002156	HSPD1
21	chr2	197605805	204072966	6467161	chr2	197991765	198008016	16251	NM_001005526	SF3B1
21	chr2	197605805	204072966	6467161	chr2	197672439	197883766	211327	NM_153697	ANKRD44
21	chr2	197605805	204072966	6467161	chr2	197964942	198008016	43074	NM_012433	SF3B1
21	chr2	197605805	204072966	6467161	chr2	198026475	198048096	21621	NM_025147	COQ10B
21	chr2	197605805	204072966	6467161	chr2	198089011	198126668	37657	NM_001100819	MOB4
21	chr2	197605805	204072966	6467161	chr2	198088539	198126668	38129	NM_199482	MOB4
21	chr2	197605805	204072966	6467161	chr2	198072965	198126668	53703	NM_001202485	HSPE1-MOB4
21	chr2	197605805	204072966	6467161	chr2	198072965	198076432	3467	NM_002157	HSPE1
21	chr2	197605805	204072966	6467161	chr2	198059552	198073243	13691	NM_199440	HSPD1
21	chr2	197605805	204072966	6467161	chr2	198089011	198126668	37657	NM_015387	MOB4
21	chr2	197605805	204072966	6467161	chr2	200528284	200537092	8808	NM_024520	C2orf47
21	chr2	197605805	204072966	6467161	chr2	198299847	198359183	59336	NM_197970	BOLL
21	chr2	197605805	204072966	6467161	chr2	198278272	198281359	3087	NM_138395	MARS2
21	chr2	197605805	204072966	6467161	chr2	198089266	198126668	37402	NM_001204094	MOB4
21	chr2	197605805	204072966	6467161	chr2	198143771	198248829	105058	NM_144629	RFTN2
21	chr2	197605805	204072966	6467161	chr2	198299847	198358319	58472	NM_033030	BOLL
21	chr2	197605805	204072966	6467161	chr2	199842467	200038076	195609	NM_001172517	SATB2
21	chr2	197605805	204072966	6467161	chr2	198377670	198722853	345183	NM_006226	PLCL1
21	chr2	197605805	204072966	6467161	chr2	199842467	200031064	188597	NM_001172509	SATB2
21	chr2	197605805	204072966	6467161	chr2	200333503	200424141	90638	NR_034096	FONG
21	chr2	197605805	204072966	6467161	chr2	200041065	200045726	4661	NR_026830	SATB2-AS1
21	chr2	197605805	204072966	6467161	chr2	199842467	200044234	201767	NM_015265	SATB2
21	chr2	197605805	204072966	6467161	chr2	200484223	200501241	17018	NM_153689	C2orf69
21	chr2	197605805	204072966	6467161	chr2	200501878	200528704	26826	NM_001039693	TYW5
21	chr2	197605805	204072966	6467161	chr2	200501878	200528704	26826	NR_004862	TYW5
21	chr2	197605805	204072966	6467161	chr2	201268690	201367186	98496	NR_001557	AOX2P
21	chr2	197605805	204072966	6467161	chr2	200879229	201055231	176002	NM_001100422	SPATS2L
21	chr2	197605805	204072966	6467161	chr2	200878848	201055231	176383	NM_015535	SPATS2L
21	chr2	197605805	204072966	6467161	chr2	200879229	201055231	176002	NM_001100424	SPATS2L
21	chr2	197605805	204072966	6467161	chr2	201099109	201157063	57954	NM_152524	SGOL2
21	chr2	197605805	204072966	6467161	chr2	201061928	201083037	21109	NM_152387	KCTD18
21	chr2	197605805	204072966	6467161	chr2	200879600	201055231	175631	NM_001100423	SPATS2L
21	chr2	197605805	204072966	6467161	chr2	201099109	201153636	54527	NM_001160046	SGOL2
21	chr2	197605805	204072966	6467161	chr2	201099109	201157063	57954	NM_001160033	SGOL2
21	chr2	197605805	204072966	6467161	chr2	201158975	201244462	85487	NM_001159	AOX1
21	chr2	197605805	204072966	6467161	chr2	201425976	201437712	11736	NR_027856	CLK1
21	chr2	197605805	204072966	6467161	chr2	201384513	201396814	12301	NM_001207067	BZW1
21	chr2	197605805	204072966	6467161	chr2	201384513	201396814	12301	NM_014670	BZW1
21	chr2	197605805	204072966	6467161	chr2	201425976	201437712	11736	NR_027855	CLK1
21	chr2	197605805	204072966	6467161	chr2	201385152	201396814	11662	NM_001207069	BZW1
21	chr2	197605805	204072966	6467161	chr2	201385300	201395211	9911	NM_001207068	BZW1
21	chr2	197605805	204072966	6467161	chr2	201462294	201476900	14606	NM_001142355	NIF3L1
21	chr2	197605805	204072966	6467161	chr2	201425976	201437529	11553	NM_001162407	CLK1
21	chr2	197605805	204072966	6467161	chr2	201462294	201476900	14606	NM_001136039	NIF3L1
21	chr2	197605805	204072966	6467161	chr2	201443923	201462094	18171	NM_032472	PPIL3
21	chr2	197605805	204072966	6467161	chr2	201443923	201462094	18171	NM_130906	PPIL3
21	chr2	197605805	204072966	6467161	chr2	201425976	201437712	11736	NM_004071	CLK1
21	chr2	197605805	204072966	6467161	chr2	201691513	201745656	54143	NM_001127183	CFLAR
21	chr2	197605805	204072966	6467161	chr2	201483138	201536669	53531	NM_006190	ORC2
21	chr2	197605805	204072966	6467161	chr2	201464885	201476900	12015	NM_001142356	NIF3L1
21	chr2	197605805	204072966	6467161	chr2	201462352	201476900	14548	NM_021824	NIF3L1
21	chr2	197605805	204072966	6467161	chr2	201483138	201536669	53531	NR_033915	ORC2
21	chr2	197605805	204072966	6467161	chr2	201644706	201658718	14012	NM_002491	NDUFB3
21	chr2	197605805	204072966	6467161	chr2	201546685	201644637	97952	NM_173822	FAM126B
21	chr2	197605805	204072966	6467161	chr2	201689121	201745656	56535	NM_001202519	CFLAR
21	chr2	197605805	204072966	6467161	chr2	201644706	201658719	14013	NM_001257102	NDUFB3
21	chr2	197605805	204072966	6467161	chr2	201689121	201745656	56535	NM_001202517	CFLAR
21	chr2	197605805	204072966	6467161	chr2	201689121	201745656	56535	NM_001202516	CFLAR
21	chr2	197605805	204072966	6467161	chr2	201689121	201745656	56535	NM_003879	CFLAR
21	chr2	197605805	204072966	6467161	chr2	201689121	201714568	25447	NM_001127184	CFLAR
21	chr2	197605805	204072966	6467161	chr2	201806410	201860679	54269	NM_001228	CASP8
21	chr2	197605805	204072966	6467161	chr2	201705932	201745656	39724	NM_001202518	CFLAR
21	chr2	197605805	204072966	6467161	chr2	201755865	201802374	46509	NM_032974	CASP10
21	chr2	197605805	204072966	6467161	chr2	201755865	201802374	46509	NM_001206542	CASP10
21	chr2	197605805	204072966	6467161	chr2	201713242	201745656	32414	NM_001202515	CFLAR
21	chr2	197605805	204072966	6467161	chr2	201713256	201730760	17504	NR_040030	CFLAR-AS1
21	chr2	197605805	204072966	6467161	chr2	201755865	201794628	38763	NM_032976	CASP10
21	chr2	197605805	204072966	6467161	chr2	201755865	201794628	38763	NM_032977	CASP10
21	chr2	197605805	204072966	6467161	chr2	201806410	201854883	48473	NM_033358	CASP8
21	chr2	197605805	204072966	6467161	chr2	201755865	201794628	38763	NM_001230	CASP10
21	chr2	197605805	204072966	6467161	chr2	201755865	201794628	38763	NM_001206524	CASP10
21	chr2	197605805	204072966	6467161	chr2	201833467	201860679	27212	NM_033356	CASP8
21	chr2	197605805	204072966	6467161	chr2	201806410	201860679	54269	NM_001080124	CASP8
21	chr2	197605805	204072966	6467161	chr2	201806410	201860679	54269	NM_033355	CASP8
21	chr2	197605805	204072966	6467161	chr2	201830998	201860679	29681	NM_001080125	CASP8
21	chr2	197605805	204072966	6467161	chr2	201861391	201930346	68955	NM_139163	ALS2CR12
21	chr2	197605805	204072966	6467161	chr2	201861391	201930346	68955	NM_001127391	ALS2CR12
21	chr2	197605805	204072966	6467161	chr2	202024636	202053819	29183	NM_001206864	STRADB
21	chr2	197605805	204072966	6467161	chr2	202024636	202053819	29183	NM_018571	STRADB
21	chr2	197605805	204072966	6467161	chr2	201950174	202024564	74390	NM_015049	TRAK2
21	chr2	197605805	204072966	6467161	chr2	202779147	202811567	32420	NM_001005781	SUMO1
21	chr2	197605805	204072966	6467161	chr2	202060388	202192150	131762	NM_001168221	ALS2CR11
21	chr2	197605805	204072966	6467161	chr2	202060388	202192150	131762	NM_001168216	ALS2CR11
21	chr2	197605805	204072966	6467161	chr2	202107287	202192150	84863	NM_001168217	ALS2CR11
21	chr2	197605805	204072966	6467161	chr2	202646222	202770131	123909	NM_001277372	LOC100652824
21	chr2	197605805	204072966	6467161	chr2	202332425	202354140	21715	NM_001135745	ALS2
21	chr2	197605805	204072966	6467161	chr2	202217841	202271662	53821	NM_033066	MPP4
21	chr2	197605805	204072966	6467161	chr2	202193151	202216497	23346	NM_001044385	TMEM237
21	chr2	197605805	204072966	6467161	chr2	202193151	202215912	22761	NM_152388	TMEM237
21	chr2	197605805	204072966	6467161	chr2	202273230	202354140	80910	NM_020919	ALS2
21	chr2	197605805	204072966	6467161	chr2	202379546	202462420	82874	NM_001261436	CDK15
21	chr2	197605805	204072966	6467161	chr2	202379546	202468518	88972	NM_001261435	CDK15
21	chr2	197605805	204072966	6467161	chr2	202379396	202468518	89122	NM_139158	CDK15
21	chr2	197605805	204072966	6467161	chr2	202607554	202611405	3851	NM_003507	FZD7
21	chr2	197605805	204072966	6467161	chr2	202779147	202811567	32420	NM_001005782	SUMO1
21	chr2	197605805	204072966	6467161	chr2	202779147	202811567	32420	NM_003352	SUMO1
21	chr2	197605805	204072966	6467161	chr2	202864284	202864396	112	NR_003694	SNORD11B
21	chr2	197605805	204072966	6467161	chr2	202838759	202876629	37870	NM_015934	NOP58
21	chr2	197605805	204072966	6467161	chr2	202849398	202849486	88	NR_003058	SNORD70
21	chr2	197605805	204072966	6467161	chr2	203485222	203559305	74083	NM_001104586	ALS2CR8
21	chr2	197605805	204072966	6467161	chr2	202949294	203140719	191425	NM_001204	BMPR2
21	chr2	197605805	204072966	6467161	chr2	203453567	203485194	31627	NM_018256	WDR12
21	chr2	197605805	204072966	6467161	chr2	203398419	203444440	46021	NM_178231	ICA1L
21	chr2	197605805	204072966	6467161	chr2	203346117	203444616	98499	NM_138468	ICA1L
21	chr2	197605805	204072966	6467161	chr2	203208145	203342725	134580	NM_173511	FAM117B
21	chr2	197605805	204072966	6467161	chr2	204014436	204108303	93867	NM_203365	RAPH1
21	chr2	197605805	204072966	6467161	chr2	203811408	203878808	67400	NM_177538	CYP20A1
21	chr2	197605805	204072966	6467161	chr2	203587846	203790962	203116	NM_001114132	NBEAL1
21	chr2	197605805	204072966	6467161	chr2	203485361	203559305	73944	NM_024744	ALS2CR8
21	chr2	197605805	204072966	6467161	chr2	204006783	204108303	101520	NM_213589	RAPH1
21	chr2	197605805	204072966	6467161	chr2	203901247	204005137	103890	NM_005759	ABI2
22	chr2	239980943	242692820	2711877	chr2	239634800	239987580	352780	NM_006037	HDAC4
22	chr2	239980943	242692820	2711877	chr2	242364912	242392375	27463	NM_022134	GAL3ST2
22	chr2	239980943	242692820	2711877	chr2	241067511	241146078	78567	NM_017844	ANKMY1
22	chr2	239980943	242692820	2711877	chr2	241023787	241056168	32381	NM_002081	GPC1
22	chr2	239980943	242692820	2711877	chr2	240349490	240387293	37803	NR_037808	LOC150935
22	chr2	239980943	242692820	2711877	chr2	240531104	240531184	80	NR_039949	MIR4786
22	chr2	239980943	242692820	2711877	chr2	240714652	240724437	9785	NM_138336	MYEOV2
22	chr2	239980943	242692820	2711877	chr2	240629902	240631072	1170	NM_001080835	PRR21
22	chr2	239980943	242692820	2711877	chr2	240545461	240613492	68031	NM_004544	NDUFA10
22	chr2	239980943	242692820	2711877	chr2	240617580	240618519	939	NM_001005853	OR6B2
22	chr2	239980943	242692820	2711877	chr2	240633166	240634162	996	NM_173351	OR6B3
22	chr2	239980943	242692820	2711877	chr2	240727118	240728746	1628	NM_148961	OTOS
22	chr2	239980943	242692820	2711877	chr2	240718914	240724420	5506	NM_001163424	MYEOV2
22	chr2	239980943	242692820	2711877	chr2	241044090	241044179	89	NR_029702	MIR149
22	chr2	239980943	242692820	2711877	chr2	241037508	241044790	7282	NR_024014	PP14571
22	chr2	239980943	242692820	2711877	chr2	242263829	242275056	11227	NM_012145	DTYMK
22	chr2	239980943	242692820	2711877	chr2	241701722	241737592	35870	NM_001252124	PASK
22	chr2	239980943	242692820	2711877	chr2	241279934	241286573	6639	NM_198998	AQP12A
22	chr2	239980943	242692820	2711877	chr2	241156676	241166822	10146	NM_018226	RNPEPL1
22	chr2	239980943	242692820	2711877	chr2	241148143	241152104	3961	NM_001033575	DUSP28
22	chr2	239980943	242692820	2711877	chr2	241067511	241146078	78567	NM_016552	ANKMY1
22	chr2	239980943	242692820	2711877	chr2	241174805	241187199	12394	NM_023085	CAPN10
22	chr2	239980943	242692820	2711877	chr2	241174805	241187199	12394	NM_023083	CAPN10
22	chr2	239980943	242692820	2711877	chr2	241213334	241219349	6015	NM_005301	GPR35
22	chr2	239980943	242692820	2711877	chr2	241193497	241219349	25852	NM_001195381	GPR35
22	chr2	239980943	242692820	2711877	chr2	241193497	241219349	25852	NM_001195382	GPR35
22	chr2	239980943	242692820	2711877	chr2	241264507	241270990	6483	NM_001102467	AQP12B
22	chr2	239980943	242692820	2711877	chr2	241474137	241484246	10109	NM_001085437	C2orf54
22	chr2	239980943	242692820	2711877	chr2	241456834	241467209	10375	NM_000030	AGXT
22	chr2	239980943	242692820	2711877	chr2	241301853	241408398	106545	NM_001244008	KIF1A
22	chr2	239980943	242692820	2711877	chr2	241301853	241385902	84049	NM_004321	KIF1A
22	chr2	239980943	242692820	2711877	chr2	241474137	241480125	5988	NM_024861	C2orf54
22	chr2	239980943	242692820	2711877	chr2	241675181	241690420	15239	NR_028049	MTERFD2
22	chr2	239980943	242692820	2711877	chr2	241675181	241690420	15239	NR_028051	MTERFD2
22	chr2	239980943	242692820	2711877	chr2	241542708	241555541	12833	NR_033841	LOC200772
22	chr2	239980943	242692820	2711877	chr2	241586927	241682316	95389	NM_001080437	SNED1
22	chr2	239980943	242692820	2711877	chr2	241694186	241737592	43406	NM_001252122	PASK
22	chr2	239980943	242692820	2711877	chr2	241683653	241690420	6767	NM_182501	MTERFD2
22	chr2	239980943	242692820	2711877	chr2	241675181	241690420	15239	NR_028050	MTERFD2
22	chr2	239980943	242692820	2711877	chr2	241694186	241737592	43406	NM_015148	PASK
22	chr2	239980943	242692820	2711877	chr2	241694186	241738067	43881	NM_001252120	PASK
22	chr2	239980943	242692820	2711877	chr2	241694186	241737592	43406	NM_001252119	PASK
22	chr2	239980943	242692820	2711877	chr2	241815354	241903788	88434	NM_005336	HDLBP
22	chr2	239980943	242692820	2711877	chr2	241815354	241860919	45565	NM_203346	HDLBP
22	chr2	239980943	242692820	2711877	chr2	241776596	241784253	7657	NM_001001666	ANO7
22	chr2	239980943	242692820	2711877	chr2	241776596	241813464	36868	NM_001001891	ANO7
22	chr2	239980943	242692820	2711877	chr2	241738574	241771112	32538	NM_002712	PPP1R7
22	chr2	239980943	242692820	2711877	chr2	241815354	241860919	45565	NM_001243900	HDLBP
22	chr2	239980943	242692820	2711877	chr2	242082794	242096783	13989	NM_001271980	STK25
22	chr2	239980943	242692820	2711877	chr2	241903395	241942114	38719	NM_001008491	2002-09-01
22	chr2	239980943	242692820	2711877	chr2	241944336	242082929	138593	NM_014808	FARP2
22	chr2	239980943	242692820	2711877	chr2	241903953	241942114	38161	NM_004404	2002-09-01
22	chr2	239980943	242692820	2711877	chr2	241903395	241942114	38719	NM_006155	2002-09-01
22	chr2	239980943	242692820	2711877	chr2	241903953	241942114	38161	NM_001008492	2002-09-01
22	chr2	239980943	242692820	2711877	chr2	242082794	242096783	13989	NR_073532	STK25
22	chr2	239980943	242692820	2711877	chr2	242082794	242097660	14866	NR_073530	STK25
22	chr2	239980943	242692820	2711877	chr2	242082794	242096783	13989	NM_006374	STK25
22	chr2	239980943	242692820	2711877	chr2	242082794	242096448	13654	NM_001271978	STK25
22	chr2	239980943	242692820	2711877	chr2	242082794	242096783	13989	NM_001271979	STK25
22	chr2	239980943	242692820	2711877	chr2	242082794	242096783	13989	NM_001271977	STK25
22	chr2	239980943	242692820	2711877	chr2	242082794	242096783	13989	NR_073531	STK25
22	chr2	239980943	242692820	2711877	chr2	242225699	242261944	36245	NM_013325	ATG4B
22	chr2	239980943	242692820	2711877	chr2	242172492	242225398	52906	NM_015963	THAP4
22	chr2	239980943	242692820	2711877	chr2	242082794	242096783	13989	NR_073533	STK25
22	chr2	239980943	242692820	2711877	chr2	242146818	242162226	15408	NM_032515	BOK
22	chr2	239980943	242692820	2711877	chr2	242132473	242147231	14758	NR_033346	BOK-AS1
22	chr2	239980943	242692820	2711877	chr2	242172492	242205589	33097	NM_001164356	THAP4
22	chr2	239980943	242692820	2711877	chr2	242225699	242261944	36245	NM_178326	ATG4B
22	chr2	239980943	242692820	2711877	chr2	242263829	242275056	11227	NM_001165031	DTYMK
22	chr2	239980943	242692820	2711877	chr2	242263829	242275056	11227	NR_033255	DTYMK
22	chr2	239980943	242692820	2711877	chr2	242290128	242317569	27441	NM_032329	ING5
22	chr2	239980943	242692820	2711877	chr2	242322702	242356904	34202	NM_152783	D2HGDH
22	chr2	239980943	242692820	2711877	chr2	242398832	242407412	8580	NM_001167601	NEU4
22	chr2	239980943	242692820	2711877	chr2	242398832	242407412	8580	NM_001167600	NEU4
22	chr2	239980943	242692820	2711877	chr2	242400702	242407412	6710	NM_080741	NEU4
22	chr2	239980943	242692820	2711877	chr2	242400702	242407412	6710	NM_001167602	NEU4
22	chr2	239980943	242692820	2711877	chr2	242679516	242751142	71626	NR_024437	LOC728323
22	chr2	239980943	242692820	2711877	chr2	242460558	242464155	3597	NM_173821	CXXC11
22	chr2	239980943	242692820	2711877	chr2	242400702	242407412	6710	NM_001167599	NEU4
22	chr2	239980943	242692820	2711877	chr2	242440705	242449731	9026	NM_005018	PDCD1
23	chr1	66487172	66981676	494504	chr1	66031443	66612850	581407	NM_002600	PDE4B
23	chr1	66487172	66981676	494504	chr1	66030780	66612850	582070	NM_001037341	PDE4B
23	chr1	66487172	66981676	494504	chr1	66570380	66612850	42470	NM_001037339	PDE4B
23	chr1	66487172	66981676	494504	chr1	66230977	66612850	381873	NM_001037340	PDE4B
23	chr1	66487172	66981676	494504	chr1	66866710	66866788	78	NR_036060	MIR3117
23	chr1	66487172	66981676	494504	chr1	66772412	66983356	210944	NM_032291	SGIP1
24	chr1	144943150	146293282	1350132	chr1	145122507	145163854	41347	NM_001144829	FMO5
24	chr1	144943150	146293282	1350132	chr1	145093308	145110753	17445	NM_005399	PRKAB2
24	chr1	144943150	146293282	1350132	chr1	144957518	144981223	23705	NR_024442	LOC728989
24	chr1	144943150	146293282	1350132	chr1	145037689	145052552	14863	NR_103466	NBPF13P
24	chr1	144943150	146293282	1350132	chr1	145116053	145118152	2099	NR_002305	PDIA3P
24	chr1	144943150	146293282	1350132	chr1	145124461	145163854	39393	NM_001144830	FMO5
24	chr1	144943150	146293282	1350132	chr1	145585791	145609258	23467	NM_016361	ACP6
24	chr1	144943150	146293282	1350132	chr1	145180914	145234071	53157	NM_001256338	CHD1L
24	chr1	144943150	146293282	1350132	chr1	145180914	145234071	53157	NM_001256337	CHD1L
24	chr1	144943150	146293282	1350132	chr1	145180914	145234071	53157	NM_001256336	CHD1L
24	chr1	144943150	146293282	1350132	chr1	145180914	145234071	53157	NM_004284	CHD1L
24	chr1	144943150	146293282	1350132	chr1	145180914	145234071	53157	NR_046070	CHD1L
24	chr1	144943150	146293282	1350132	chr1	145180914	145234071	53157	NM_024568	CHD1L
24	chr1	144943150	146293282	1350132	chr1	145124461	145163854	39393	NM_001461	FMO5
24	chr1	144943150	146293282	1350132	chr1	145479805	145564639	84834	NM_004326	BCL9
24	chr1	144943150	146293282	1350132	chr1	145320537	145456323	135786	NR_038423	LINC00624
24	chr1	144943150	146293282	1350132	chr1	145932717	145950955	18238	NR_003377	PDZK1P1
24	chr1	144943150	146293282	1350132	chr1	145694955	145699338	4383	NM_181703	GJA5
24	chr1	144943150	146293282	1350132	chr1	145841569	145848019	6450	NM_005267	GJA8
24	chr1	144943150	146293282	1350132	chr1	145694955	145712108	17153	NM_005266	GJA5
24	chr1	144943150	146293282	1350132	chr1	145867129	145932377	65248	NM_016334	GPR89B
24	chr1	144943150	146293282	1350132	chr1	145892190	145932379	40189	NM_001097616	GPR89C
24	chr1	144943150	146293282	1350132	chr1	146040946	146091225	50279	NR_046188	NBPF24
24	chr1	144943150	146293282	1350132	chr1	146040946	146713553	672607	NM_001037501	NBPF8
24	chr1	144943150	146293282	1350132	chr1	146040946	146713553	672607	NR_102404	NBPF8
24	chr1	144943150	146293282	1350132	chr1	146040946	146066195	25249	NM_001101663	NBPF24
24	chr1	144943150	146293282	1350132	chr1	146040946	146091093	50147	NM_183372	NBPF11
24	chr1	144943150	146293282	1350132	chr1	146040946	146713553	672607	NR_102405	NBPF8
24	chr1	144943150	146293282	1350132	chr1	146273226	146273302	76	NR_049810	MIR5087
24	chr1	144943150	146293282	1350132	chr1	146042569	146713415	670846	NM_001039703	NBPF10
25	chr1	241675290	241777030	101740	chr1	241485929	241730016	244087	NM_006642	SDCCAG8
25	chr1	241675290	241777030	101740	chr1	241718157	242073207	355050	NM_181690	AKT3
25	chr1	241675290	241777030	101740	chr1	241729643	242073207	343564	NM_005465	AKT3
25	chr1	241675290	241777030	101740	chr1	241729643	242073509	343866	NM_001206729	AKT3
26	chr9	194201	5739305	5545104	chr9	5440502	5460567	20065	NM_014143	CD274
26	chr9	194201	5739305	5545104	chr9	2525654	2612373	86719	NR_015375	FLJ35024
26	chr9	194201	5739305	5545104	chr9	966967	981732	14765	NM_021240	DMRT3
26	chr9	194201	5739305	5545104	chr9	263047	455259	192212	NM_001193536	DOCK8
26	chr9	194201	5739305	5545104	chr9	203107	205893	2786	NM_152569	C9orf66
26	chr9	194201	5739305	5545104	chr9	204864	455259	250395	NM_203447	DOCK8
26	chr9	194201	5739305	5545104	chr9	831689	959090	127401	NM_021951	DMRT1
26	chr9	194201	5739305	5545104	chr9	460293	736106	275813	NM_001256876	KANK1
26	chr9	194201	5739305	5545104	chr9	263047	455259	192212	NM_001190458	DOCK8
26	chr9	194201	5739305	5545104	chr9	494694	736106	241412	NM_015158	KANK1
26	chr9	194201	5739305	5545104	chr9	696805	736106	39301	NM_153186	KANK1
26	chr9	194201	5739305	5545104	chr9	494694	736106	241412	NM_001256877	KANK1
26	chr9	194201	5739305	5545104	chr9	1040345	1047554	7209	NM_006557	DMRT2
26	chr9	194201	5739305	5545104	chr9	2005341	2183623	178282	NM_139045	SMARCA2
26	chr9	194201	5739305	5545104	chr9	2005341	2183623	178282	NM_003070	SMARCA2
26	chr9	194201	5739305	5545104	chr9	1040353	1047554	7201	NM_001130865	DMRT2
26	chr9	194201	5739305	5545104	chr9	1040619	1047554	6935	NM_181872	DMRT2
26	chr9	194201	5739305	5545104	chr9	3814127	4142183	328056	NM_152629	GLIS3
26	chr9	194201	5739305	5545104	chr9	3237036	3515983	278947	NM_002919	RFX3
26	chr9	194201	5739305	5545104	chr9	2611792	2644485	32693	NM_001018056	VLDLR
26	chr9	194201	5739305	5545104	chr9	2611792	2644485	32693	NM_003383	VLDLR
26	chr9	194201	5739305	5545104	chr9	3214646	3515983	301337	NM_134428	RFX3
26	chr9	194201	5739305	5545104	chr9	2707525	2720037	12512	NM_133497	KCNV2
26	chr9	194201	5739305	5545104	chr9	2794154	2834130	39976	NM_014878	KIAA0020
26	chr9	194201	5739305	5545104	chr9	4782833	4851064	68231	NM_005772	RCL1
26	chr9	194201	5739305	5545104	chr9	4480426	4577469	97043	NM_004170	SLC1A1
26	chr9	194201	5739305	5545104	chr9	3814127	4290035	475908	NM_001042413	GLIS3
26	chr9	194201	5739305	5545104	chr9	3888645	3891248	2603	NR_026663	GLIS3-AS1
26	chr9	194201	5739305	5545104	chr9	4669565	4696594	27029	NM_017913	CDC37L1
26	chr9	194201	5739305	5545104	chr9	4588315	4656674	68359	NM_001039395	SPATA6L
26	chr9	194201	5739305	5545104	chr9	4652293	4655272	2979	NM_203453	PPAPDC2
26	chr9	194201	5739305	5545104	chr9	4699556	4731799	32243	NM_001199855	AK3
26	chr9	194201	5739305	5545104	chr9	4699556	4731309	31753	NM_016282	AK3
26	chr9	194201	5739305	5545104	chr9	4699556	4716227	16671	NM_001199856	AK3
26	chr9	194201	5739305	5545104	chr9	4699556	4732043	32487	NM_001199853	AK3
26	chr9	194201	5739305	5545104	chr9	4699556	4731309	31753	NM_001199852	AK3
26	chr9	194201	5739305	5545104	chr9	5347966	5427937	79971	NM_018465	PLGRKT
26	chr9	194201	5739305	5545104	chr9	4840296	4840375	79	NR_029836	MIR101-2
26	chr9	194201	5739305	5545104	chr9	5153862	5175618	21756	NM_007179	INSL6
26	chr9	194201	5739305	5545104	chr9	4975244	5118183	142939	NM_004972	JAK2
26	chr9	194201	5739305	5545104	chr9	5289865	5294611	4746	NM_134441	RLN2
26	chr9	194201	5739305	5545104	chr9	5221418	5223967	2549	NM_002195	INSL4
26	chr9	194201	5739305	5545104	chr9	5289865	5294611	4746	NM_005059	RLN2
26	chr9	194201	5739305	5545104	chr9	5324931	5329873	4942	NM_006911	RLN1
[truncated: 867 more rows]

## Sheet: Stefansson et al SZ CNVs
Merged.CNV.ID	CNV.Chr	CNV.Start	CNV.End	CNV.Size	TX.Chr	TX.Start	TX.End	TX.Length	Accession	GeneSymbol
[truncated: 157 more rows]

[truncated: 4 more sheets: Mowry & Gratten, Murdoch & State, NSCgenelist, README]
